# Supplementary material
Source: PubMed Central journal article supplement (PMC2849972)
Supplement: NIHMS187452-supplement-1_si_001.pdf [file NIHMS187452-supplement-1_si_001.pdf]

# Supporting Information for

## Dictazoles: Potential Vinyl Cyclobutane Biosynthetic Precursors to the Dictazolines.

*Jingqiu Dai, Jorge I. Jiménez, Michelle Kelly, Philip G. Williams*

Department of Chemistry, University of Hawai`i at Manoa, Honolulu, Hawai`i, 96822, The Cancer Research Center of Hawai`i, 651 Ilalo Street, Honolulu, Hawai`i 96813, National Centre for Aquatic Biodiversity and Biosecurity, National Institute of Water and Atmospheric Research Ltd, Newmarket, Auckland, New Zealand, and AgraQuest, Inc., 1540 Drew Avenue, Davis, CA, 95618

## Table of Contents

|                                                                                                                                                        |     |
|--------------------------------------------------------------------------------------------------------------------------------------------------------|-----|
| General Experimental Procedures                                                                                                                        | S4  |
| <b>Table S1.</b> NMR Spectroscopic Data (500 MHz) for Dictazole A ( <b>1</b> ) in DMSO- <i>d</i> <sub>6</sub>                                          | S6  |
| <b>Table S2.</b> NMR Spectroscopic Data (500 MHz) for Dictazole A ( <b>1</b> ) in MeOH- <i>d</i> <sub>4</sub>                                          | S7  |
| <b>Table S3.</b> NMR Spectroscopic Data (500 MHz) for Dictazole B ( <b>2</b> ) in DMSO- <i>d</i> <sub>6</sub>                                          | S8  |
| <b>Table S4.</b> NMR Spectroscopic Data (500 MHz) for Dictazole C ( <b>5</b> ) in MeOH- <i>d</i> <sub>4</sub>                                          | S9  |
| <b>Table S5.</b> <sup>1</sup> H and <sup>13</sup> C NMR Spectroscopic Data (500 MHz) for Dictazoline C-E ( <b>5-7</b> ) in MeOH- <i>d</i> <sub>4</sub> | S10 |
| <b>Figure S1.</b> <sup>1</sup> H NMR Spectrum (500 MHz) of Dictazole A ( <b>1</b> ) in MeOH- <i>d</i> <sub>4</sub>                                     | S11 |
| <b>Figure S2.</b> <sup>1</sup> H NMR Spectrum (500 MHz) of Dictazole A ( <b>1</b> ) in MeOH- <i>d</i> <sub>4</sub> used for 2D NMR                     | S12 |
| <b>Figure S3.</b> <sup>13</sup> C NMR Spectrum (125 MHz) of Dictazole A ( <b>1</b> ) in MeOH- <i>d</i> <sub>4</sub>                                    | S13 |
| <b>Figure S4.</b> DEPT 90 NMR Spectrum (125 MHz) of Dictazole A ( <b>1</b> ) in MeOH- <i>d</i> <sub>4</sub>                                            | S14 |
| <b>Figure S5.</b> gHSQC NMR Spectrum (500 MHz) of Dictazole A ( <b>1</b> ) in MeOH- <i>d</i> <sub>4</sub>                                              | S15 |
| <b>Figure S6.</b> Expansion of gHSQC NMR Spectrum (500 MHz) of Dictazole A ( <b>1</b> ) in MeOH- <i>d</i> <sub>4</sub>                                 | S16 |
| <b>Figure S7.</b> Expansion of gHSQC NMR Spectrum (500 MHz) of Dictazole A ( <b>1</b> ) in MeOH- <i>d</i> <sub>4</sub>                                 | S17 |
| <b>Figure S8.</b> gDQF-COSY NMR Spectrum (500 MHz) of Dictazole A ( <b>1</b> ) in MeOH- <i>d</i> <sub>4</sub>                                          | S18 |
| <b>Figure S9.</b> Expansion of COSY NMR Spectrum (500 MHz) of Dictazole A ( <b>1</b> ) in MeOH- <i>d</i> <sub>4</sub>                                  | S19 |
| <b>Figure S10.</b> gHMBC NMR Spectrum (500 MHz) of Dictazole A ( <b>1</b> ) in MeOH- <i>d</i> <sub>4</sub>                                             | S20 |
| <b>Figure S11.</b> Expansion of HMBC NMR Spectrum (500 MHz) of Dictazole A ( <b>1</b> ) in MeOH- <i>d</i> <sub>4</sub>                                 | S21 |
| <b>Figure S12.</b> Expansion of HMBC NMR Spectrum (500 MHz) of Dictazole A ( <b>1</b> ) in MeOH- <i>d</i> <sub>4</sub>                                 | S22 |
| <b>Figure S13.</b> Expansion of HMBC NMR Spectrum (500 MHz) of Dictazole A ( <b>1</b> ) in MeOH- <i>d</i> <sub>4</sub>                                 | S23 |
| <b>Figure S14.</b> DPGFSE 1D NOE Spectrum at of Dictazole A ( <b>1</b> ) with excitation of H-8                                                        | S24 |
| <b>Figure S15.</b> DPGFSE 1D NOE Spectrum at of Dictazole A ( <b>1</b> ) with excitation of H-8'                                                       | S25 |
| <b>Figure S16.</b> <sup>1</sup> H NMR Spectrum (500 MHz) of Dictazole A ( <b>1</b> ) in DMSO- <i>d</i> <sub>6</sub>                                    | S26 |
| <b>Figure S17.</b> <sup>13</sup> C NMR Spectrum (125 MHz) of Dictazole A ( <b>1</b> ) in DMSO- <i>d</i> <sub>6</sub>                                   | S27 |
| <b>Figure S18.</b> meHSQC NMR Spectrum (500 MHz) of Dictazole A ( <b>1</b> ) in DMSO- <i>d</i> <sub>6</sub>                                            | S28 |
| <b>Figure S19.</b> Expansion of meHSQC NMR Spectrum (500 MHz) of Dictazole A ( <b>1</b> ) in DMSO- <i>d</i> <sub>6</sub>                               | S29 |
| <b>Figure S20.</b> Expansion of meHSQC NMR Spectrum (500 MHz) of Dictazole A ( <b>1</b> ) in DMSO- <i>d</i> <sub>6</sub>                               | S30 |
| <b>Figure S21.</b> Expansion of meHSQC NMR Spectrum (500 MHz) of Dictazole A ( <b>1</b> ) in DMSO- <i>d</i> <sub>6</sub>                               | S31 |
| <b>Figure S22.</b> gHMBC NMR Spectrum (500 MHz) of Dictazole A ( <b>1</b> ) in DMSO- <i>d</i> <sub>6</sub>                                             | S32 |
| <b>Figure S23.</b> Expansion of HMBC NMR Spectrum (500 MHz) of Dictazole A ( <b>1</b> ) in DMSO- <i>d</i> <sub>6</sub>                                 | S33 |
| <b>Figure S24.</b> Expansion of HMBC NMR Spectrum (500 MHz) of Dictazole A ( <b>1</b> ) in DMSO- <i>d</i> <sub>6</sub>                                 | S34 |
| <b>Figure S25.</b> Expansion of HMBC NMR Spectrum (500 MHz) of Dictazole A ( <b>1</b> ) in DMSO- <i>d</i> <sub>6</sub>                                 | S35 |
| <b>Figure S26.</b> Expansion of HMBC NMR Spectrum (500 MHz) of Dictazole A ( <b>1</b> ) in DMSO- <i>d</i> <sub>6</sub>                                 | S36 |
| <b>Figure S27.</b> <sup>1</sup> H NMR Spectrum (500 MHz) of Dictazole B ( <b>2</b> ) in DMSO- <i>d</i> <sub>6</sub>                                    | S37 |
| <b>Figure S28.</b> NOESY Spectrum (500 MHz) of Dictazole B ( <b>2</b> ) in DMSO- <i>d</i> <sub>6</sub>                                                 | S38 |
| <b>Figure S29.</b> Expansion of NOESY Spectrum (500 MHz) of Dictazole B ( <b>2</b> ) in DMSO- <i>d</i> <sub>6</sub>                                    | S39 |
| <b>Figure S30.</b> Expansion of NOESY Spectrum (500 MHz) of Dictazole B ( <b>2</b> ) in DMSO- <i>d</i> <sub>6</sub>                                    | S40 |
| <b>Figure S31.</b> Expansion of NOESY Spectrum (500 MHz) of Dictazole B ( <b>2</b> ) in DMSO- <i>d</i> <sub>6</sub>                                    | S41 |
| <b>Figure S32.</b> DPGFSE 1D NOE Spectrum at of Dictazole B ( <b>2</b> ) in DMSO- <i>d</i> <sub>6</sub> with excitation of H-8                         | S42 |
| <b>Figure S33.</b> DPGFSE 1D NOE Spectrum at of Dictazole B ( <b>2</b> ) in DMSO- <i>d</i> <sub>6</sub> with excitation of H-8'                        | S43 |
| <b>Figure S34.</b> <sup>1</sup> H NMR Spectrum (500 MHz) of Dictazoline C ( <b>5</b> ) in MeOH- <i>d</i> <sub>4</sub>                                  | S44 |
| <b>Figure S35.</b> <sup>13</sup> C NMR Spectrum (125 MHz) of Dictazoline C ( <b>5</b> ) in MeOH- <i>d</i> <sub>4</sub>                                 | S45 |
| <b>Figure S36.</b> meHSQC NMR Spectrum (500 MHz) of Dictazoline C ( <b>5</b> ) in MeOH- <i>d</i> <sub>4</sub>                                          | S46 |
| <b>Figure S37.</b> Expansion of HSQC NMR Spectrum (500 MHz) of Dictazoline C ( <b>5</b> ) in MeOH- <i>d</i> <sub>4</sub>                               | S47 |
| <b>Figure S38.</b> Expansion of HSQC NMR Spectrum (500 MHz) of Dictazoline C ( <b>5</b> ) in MeOH- <i>d</i> <sub>4</sub>                               | S48 |
| <b>Figure S39.</b> COSY NMR Spectrum (500 MHz) of Dictazoline C ( <b>5</b> ) in MeOH- <i>d</i> <sub>4</sub>                                            | S49 |
| <b>Figure S40.</b> HMBC NMR Spectrum (500 MHz) of Dictazoline C ( <b>5</b> ) in MeOH- <i>d</i> <sub>4</sub>                                            | S50 |
| <b>Figure S41.</b> Expansion of HMBC NMR Spectrum (500 MHz) of Dictazoline C ( <b>5</b> ) in MeOH- <i>d</i> <sub>4</sub>                               | S51 |

|                                                                                                                          |     |
|--------------------------------------------------------------------------------------------------------------------------|-----|
| <b>Figure S42.</b> Expansion of HMBC NMR Spectrum (500 MHz) of Dictazoline C ( <b>5</b> ) in MeOH- <i>d</i> <sub>4</sub> | S52 |
| <b>Figure S43.</b> NOESY Spectrum (500 MHz) of Dictazoline C ( <b>5</b> ) in MeOH- <i>d</i> <sub>4</sub>                 | S53 |
| <b>Figure S44.</b> Expansion of NOESY Spectrum (500 MHz) of Dictazoline C ( <b>5</b> ) in MeOH- <i>d</i> <sub>4</sub>    | S54 |
| <b>Figure S45.</b> Expansion of NOESY Spectrum (500 MHz) of Dictazoline C ( <b>5</b> ) in MeOH- <i>d</i> <sub>4</sub>    | S55 |
| <b>Figure S46.</b> <sup>1</sup> H NMR Spectrum (500 MHz) of Dictazoline D ( <b>6</b> ) in MeOH- <i>d</i> <sub>4</sub>    | S56 |
| <b>Figure S47.</b> NOESY Spectrum (500 MHz) of Dictazoline D ( <b>6</b> ) in MeOH- <i>d</i> <sub>4</sub>                 | S57 |
| <b>Figure S48.</b> Expansion of NOESY Spectrum (500 MHz) of Dictazoline D ( <b>6</b> ) in MeOH- <i>d</i> <sub>4</sub>    | S58 |
| <b>Figure S49.</b> <sup>1</sup> H NMR Spectrum (500 MHz) of Dictazoline E ( <b>7</b> ) in MeOH- <i>d</i> <sub>4</sub>    | S59 |
| <b>Figure S50.</b> <sup>13</sup> C NMR Spectrum (500 MHz) of Dictazoline E ( <b>7</b> ) in MeOH- <i>d</i> <sub>4</sub>   | S60 |
| <b>Figure S51.</b> NOESY Spectrum (500 MHz) of Dictazoline E ( <b>7</b> ) in MeOH- <i>d</i> <sub>4</sub>                 | S61 |
| <b>Figure S52.</b> Expansion of NOESY Spectrum (500 MHz) of Dictazoline E ( <b>7</b> ) in MeOH- <i>d</i> <sub>4</sub>    | S62 |
| <b>Figure S53.</b> LC-MS Chromatogram of <b>1</b>                                                                        | S63 |
| <b>Figure S54.</b> LC-MS Chromatogram of <b>1</b> after microwave heating in methanol                                    | S64 |
| <b>Figure S55.</b> LC-MS Chromatogram of <b>1</b> after microwave heating in water                                       | S65 |
| <b>Figure S56.</b> CD spectra of <b>1</b> and <b>5</b>                                                                   | S66 |

**General methods.** Optical rotations were measured on a polarimeter at the sodium line (589 nm). IR bands were measured as a thin film on a CaF<sub>2</sub> disc. NMR spectra were acquired on a 500 MHz spectrometer operating at 500 or 125 MHz using the residual solvent signals as an internal reference (CD<sub>3</sub>OD  $\delta_{\text{H}}$  3.30 ppm,  $\delta_{\text{C}}$  49.0 ppm). High-resolution mass spectral data were obtained on a LC-MSD-TOF using the ESI or APCI mode.

**Collection and Identification.** M. Kelly, National Institute of Water and Atmospheric Research, New Zealand, identified the sponge. The sponge sample was collected from Hospital Point on Solarte Isle, Boca del Toro, on the northwest coast of Panama, from a depth of 2-3 m, on January 8, 2000. In life, the sponge forms a thick encrusting pad with raised oscules and a honeycombed to conulose surface. The color in life is pinkish brown, darkening to wood brown out of the water. The texture is springy, and the sponge exudes slime. Large dark brown laminated and pithed fibers dominate the skeleton, and are concentrated at the surface. The sponge is most closely comparable to *Smenospongia cerebriformis* (Duchassaing & Michelotti, 1864) (Order Dictyoceratida: Family Thorectidae). A voucher specimen has been deposited in the Natural History Museum, London (BMHN 2000.12.11.6).

**Extraction and Isolation.** The freeze-dried sponge (114 g) was exhaustively extracted with 1:1 i-PrOH:CH<sub>2</sub>Cl<sub>2</sub> (3 x 3 L) to afford 14.85 g of lipophilic extract. Partitioning using a modified Kupchan procedure yielded four fractions of 6.07, 1.88, 2.94 and 5.78 g from the hexane, dichloromethane, n-butanol and water phases. The organic residue from the n-BuOH phase (2.94 g) was separated on a Sephadex LH-20 column (1300 x 30 mm) eluting with MeOH (flowrate 1.74 mL/min). The resulting thirty-three fractions were analyzed by TLC and pooled based on the results into seven fractions.

Sephadex fraction 2 (582.5 mg) was chromatographed on a Si gel flash column (6.0 g) eluting with a gradient of CH<sub>2</sub>Cl<sub>2</sub>-MeOH. LC-MS analysis of the resulting fractions indicated one contained a series of halogenated compounds. Separation of this fraction by RP-HPLC [Luna C8, 250 x 10 mm, a linear gradient from 10-50% MeCN in water with 0.1 % formic acid in both solvents over 40 min, flow rate 3 mL/min, PDA and ELSD detection] afforded Dictazoline D (**6**,  $t_{\text{R}}$  26.9 min, 0.3 mg) and Dictazoline E (**7**,  $t_{\text{R}}$  23.5 min, 0.5 mg).

Sephadex fraction 4 (598.4 mg) was chromatographed on a Si gel flash column (6.0 g) eluting with a gradient of CH<sub>2</sub>Cl<sub>2</sub>-MeOH. Separation of the fifth fraction from this silica flash column by RP-HPLC [Luna C8, 250 x 10

mm, a linear gradient from 15-35% MeCN in water with 0.1 % formic acid in both solvents over 40 min, flow rate 3 mL/min, PDA and ELSD detection] afforded Dictazole B (**2**,  $t_R$  29.0 min, 0.8 mg) and a fraction containing Dictazoline C (**5**). Further purification of **5** by RP-HPLC [Luna C8, 250 x 10 mm, a linear gradient from 10-30% MeCN in water with 0.1 % formic acid in both solvents over 40 min, flow rate 3 mL/min, PDA and ELSD detection] afforded dictazoline C (**5**,  $t_R$  28.5 min, 1.5 mg). Fraction 6 (40.0 mg) from the silica flash column of Sephadex fraction 4 was also purified by RP-HPLC [Luna C8, 250 x 10 mm, a linear gradient from 5-40% MeCN in water with 0.1 % formic acid in both solvents over 40 min, flow rate 3 mL/min, PDA and ELSD detection] to afford **1** ( $t_R$  35.0 min, 4.5 mg).

**Dictazole A (1, 4.5 mg,  $3.0 \times 10^{-2}$  % yield):** colorless powder;  $[\alpha]_D^{22} +8.5$  ( $c$  0.2, MeOH); UV (MeOH)  $\lambda_{max}$  (log  $\epsilon$ ) 223 (2.5) 284 (2.4) nm; IR (CaF<sub>2</sub>)  $\nu_{max}$  3337, 1643, 1592, 1352 cm<sup>-1</sup>; See Table S1 (DMSO-*d*<sub>6</sub>) and Table S2 (MeOH-*d*<sub>4</sub>) for tabulated spectral data; HRESI-TOFMS  $m/z$  561.1206 [M + H]<sup>+</sup> [Calcd for C<sub>26</sub>H<sub>24</sub><sup>81</sup>BrN<sub>8</sub>O<sub>2</sub><sup>+</sup>, 561.1185, +3.7 ppm].

**Dictazole B (2, 0.8 mg,  $5.0 \times 10^{-3}$  % yield):** colorless powder;  $[\alpha]_D^{22} -42.5$  ( $c$  0.2, MeOH); UV (MeOH)  $\lambda_{max}$  (log  $\epsilon$ ) 228 (2.5) 288 (1.9) nm; IR (CaF<sub>2</sub>)  $\nu_{max}$  3392, 1653, 1591, 1352 cm<sup>-1</sup>; See Table S3 for tabulated spectral data; HRESI-TOFMS  $m/z$  [M + H]<sup>+</sup> 651.0490 [Calcd for C<sub>27</sub>H<sub>25</sub><sup>79</sup>Br<sub>2</sub>N<sub>8</sub>O<sub>2</sub><sup>+</sup>, 651.0467, +3.5 ppm].

**Dictazoline C (5, 1.5 mg,  $1.0 \times 10^{-2}$  % yield):** colorless powder;  $[\alpha]_D^{22} -19.2$  ( $c$  0.2, MeOH); UV (MeOH)  $\lambda_{max}$  (log  $\epsilon$ ) 225 (2.6) 289 (1.9) nm; IR (CaF<sub>2</sub>)  $\nu_{max}$  3542, 1646 cm<sup>-1</sup>; See Table S4 for tabulated spectral data; HRESI-TOFMS  $m/z$  559.1221 [M + H]<sup>+</sup> [Calcd for C<sub>26</sub>H<sub>24</sub><sup>79</sup>BrN<sub>8</sub>O<sub>2</sub><sup>+</sup>, 559.1206, +2.8 ppm].

**Dictazoline D (6, 2.5 mg,  $1.7 \times 10^{-2}$  % yield):** colorless powder;  $[\alpha]_D^{22} -1.1$  ( $c$  0.1, MeOH); UV (MeOH)  $\lambda_{max}$  (log  $\epsilon$ ) 283 (9.14) nm; IR (CaF<sub>2</sub>)  $\nu_{max}$  3422, 2930, 1656, 1586 cm<sup>-1</sup>; See Table S5 for tabulated spectral data; HRESI-TOFMS  $m/z$  573.1352 [M + H]<sup>+</sup> [Calcd for C<sub>27</sub>H<sub>26</sub><sup>79</sup>BrN<sub>8</sub>O<sub>2</sub><sup>+</sup>, 573.1362, -1.7 ppm].

**Dictazoline E (7, 0.5 mg,  $3.4 \times 10^{-3}$  % yield):** colorless powder;  $[\alpha]_D^{22} -22.5$  ( $c$  0.2, MeOH); UV (MeOH)  $\lambda_{max}$  (log  $\epsilon$ ) 220 (4.6) 283 (3.8) nm; IR (CaF<sub>2</sub>)  $\nu_{max}$  3542, 1646 cm<sup>-1</sup>; See Table S5 for tabulated spectral data; HRESI-TOFMS  $m/z$  495.2279 [M + H]<sup>+</sup> [Calcd for C<sub>27</sub>H<sub>27</sub>N<sub>8</sub>O<sub>2</sub><sup>+</sup>, 495.2257, +4.4 ppm].

**Table S1.** NMR Spectroscopic Data (500 MHz) for Dictazole A (**1**) in DMSO-*d*<sub>6</sub>

| Position | $\delta_C$            | $\delta_H$ , mult ( <i>J</i> in Hz) | HMBC                            | ROESY                |
|----------|-----------------------|-------------------------------------|---------------------------------|----------------------|
| 2        | 124.6, CH             | 7.15, s                             |                                 | H-8, H-15'           |
| 3        | 106.5, C              |                                     | H-2, H-4, H-8                   |                      |
| 3a       | 126.4, C              |                                     | H-2, H-4, H-5,<br>H-7, H-8      |                      |
| 4        | 119.5, CH             | 7.25, d (8.3)                       |                                 | H-8, H-14'           |
| 5        | 121.9, CH             | 7.07, d (8.3)                       |                                 |                      |
| 6        | 114.2, C              |                                     | H-4, H-5, H-7                   |                      |
| 7        | 114.3, CH             | 7.54, s                             |                                 |                      |
| 7a       | 136.3, C              |                                     | H-2, H-4                        |                      |
| 8        | 43.4, CH              | 4.46, s                             | H-8'                            | H-2, H-14'           |
| 9        | 67.2, C               |                                     | H-8', H-8, H-10                 |                      |
| 10       |                       | 8.16, s                             |                                 | H-2'                 |
| 11       | 170.9, C              |                                     | H-10                            |                      |
| 13       | 188.4, C              |                                     | H-8, H-8', H-10                 |                      |
| 2'       | 123.6, CH             | 7.13, s                             |                                 | H-8, H-10            |
| 3'       | 105.9, C              |                                     | H-2', H-4', H-8                 |                      |
| 3a'      | 127.4, C              |                                     | H-2', H-4', H-5',<br>H-7', H-8' |                      |
| 4'       | 117.7, CH             | 7.31, d (8.0)                       |                                 | H-8, H-14'           |
| 5'       | 119.1, CH             | 6.95, t (8.0)                       |                                 |                      |
| 6'       | 121.6, CH             | 7.05, t (8.0)                       |                                 |                      |
| 7'       | 111.7, CH             | 7.32, d (8.0)                       |                                 |                      |
| 7a'      | 135.3, C              |                                     | H-2', H-4', H-6'                |                      |
| 8'       | 43.6, CH              | 4.49, s                             | H-8'                            | H-2', H-14'          |
| 9'       | 72.7, C               |                                     | H-8, H-8', H-14'                |                      |
| 11'      | 153.5, C              |                                     | H-14', H-15'                    |                      |
| 13'      | 172.5, C              |                                     | H-8, H-8', H-15'                |                      |
| 14'      | 25.8, CH <sub>3</sub> | 3.21, s                             |                                 | H-4', H-8', H-4, H-8 |
| 15'      | 25.1, CH <sub>3</sub> | 2.73, s                             |                                 | H-2                  |

**Table S2.** NMR Spectroscopic Data (500 MHz) for Dictazole A (**1**) in MeOH-*d*<sub>4</sub>

| Position | $\delta_C$            | $\delta_H$ , mult ( <i>J</i> in Hz) | HMBC                   | ROESY                |
|----------|-----------------------|-------------------------------------|------------------------|----------------------|
| 2        | 125.4, CH             | 7.17, s                             |                        | H-15'                |
| 3        | 106.7, C              |                                     | H-2, H-4, H-8          |                      |
| 3a       | 127.4, C              |                                     | H-2, H-5, H-7, H-8     |                      |
| 4        | 120.0, CH             | 7.27, d (7.9)                       |                        | H-14'                |
| 5        | 123.7, CH             | 7.11, d (7.9)                       |                        |                      |
| 6        | 116.4, C              |                                     | H-7                    |                      |
| 7        | 115.4, CH             | 7.50, s                             |                        |                      |
| 7a       | 138.0, C              |                                     | H-2, H-4, H-7          |                      |
| 8        | 45.7, CH              | 4.82, s                             |                        | H-8', H-14'          |
| 9        | 74.6, C               |                                     | H-8', H-8              |                      |
| 11       | 157.0, C              |                                     |                        |                      |
| 13       | 173.8, C              |                                     |                        |                      |
| 2'       | 124.5, CH             | 7.16, s                             |                        |                      |
| 3'       | 106.1, C              |                                     | H-2', H-4', H-8'       |                      |
| 3a'      | 128.4, C              |                                     | H-2', H-5', H-7', H-8' |                      |
| 4'       | 118.4, CH             | 7.36, d (8.0)                       |                        | H-14'                |
| 5'       | 120.6, CH             | 7.00, t (8.0)                       |                        |                      |
| 6'       | 123.1, CH             | 7.10, t (8.0)                       |                        |                      |
| 7'       | 112.5, CH             | 7.33, d (8.0)                       |                        |                      |
| 7a'      | 137.2, C              |                                     | H-2', H-4', H-6'       |                      |
| 8'       | 45.4, CH              | 4.78, s                             |                        | H-8, H-14'           |
| 9'       | 74.6, C               |                                     | H-8, H-8', H-14'       |                      |
| 11'      | 157.0, C              |                                     | H-14', H-15'           |                      |
| 13'      | 173.8, C              |                                     | H-8, H-8', H-15'       |                      |
| 14'      | 27.1, CH <sub>3</sub> | 3.51, s                             |                        | H-4', H-8', H-4, H-8 |
| 15'      | 25.9, CH <sub>3</sub> | 2.94, s                             |                        | H-2'                 |

**Table S3.** NMR Spectroscopic Data (500 MHz) for Dictazole B (**2**) in DMSO-*d*<sub>6</sub>

| Position | $\delta_C$            | $\delta_H$ , mult ( <i>J</i> in Hz) | HMBC                   | ROESY     |
|----------|-----------------------|-------------------------------------|------------------------|-----------|
| 2        | 124.6, CH             | 7.42, s                             |                        |           |
| 3        | 106.7, C              |                                     | H-2, H-4, H-8          |           |
| 3a       | 126.4, C              |                                     | H-2, H-5, H-7, H-8     |           |
| 4        | 118.4, CH             | 6.78, d (7.9)                       |                        | H-8       |
| 5        | 121.7, CH             | 7.05, dd (7.9, 2.1)                 |                        |           |
| 6        | 114.0, C              |                                     | H-4, H-5, H-7          |           |
| 7        | 114.2, CH             | 7.52, d (2.1)                       |                        |           |
| 7a       | 136.9, C              |                                     | H-2, H-4               |           |
| 8        | 44.5, CH              | 5.01, s                             |                        | H-4, H-14 |
| 9        | 68.5, C               |                                     | H-8', H-8, H-14        |           |
| 11       | 170.3, C              |                                     | H-14                   |           |
| 13       | 188.0, C              |                                     | H-8, H-8'              |           |
| 14       | 28.5, CH <sub>3</sub> | 3.09, s                             |                        | H-8       |
| 2'       | 123.5, CH             | 7.14, s                             |                        | H-15'     |
| 3'       | 107.3, C              |                                     | H-2', H-4', H-8'       |           |
| 3a'      | 125.8, C              |                                     | H-2', H-5', H-7', H-8' |           |
| 4'       | 119.2, CH             | 6.91, d (7.9)                       |                        |           |
| 5'       | 121.5, CH             | 7.02, dd (7.9, 2.1)                 |                        |           |
| 6'       | 114.0, C              |                                     | H-4', H-5', H-7'       |           |
| 7'       | 114.2, CH             | 7.54, d (2.1)                       |                        |           |
| 7a'      | 137.0, C              |                                     | H-2', H-4'             |           |
| 8'       | 45.9, CH              | 5.09, s                             |                        | H-14'     |
| 9'       | 66.5, C               |                                     | H-8, H-8', H-14'       |           |
| 11'      | 153.8, C              |                                     | H-14', H-15'           |           |
| 13'      | 174.6, C              |                                     | H-8, H-8', H-15'       |           |
| 14'      | 27.5, CH <sub>3</sub> | 3.04, s                             |                        | H-8'      |
| 15'      | 25.2, CH <sub>3</sub> | 3.00, s                             |                        | H-2'      |



**Table S4.** NMR Spectroscopic Data (500 MHz) for Dictazoline C (**5**) in MeOH-*d*<sub>4</sub>

| Position | $\delta_C$            | $\delta_H$ , mult ( <i>J</i> in Hz) | HMBC          | ROESY              |
|----------|-----------------------|-------------------------------------|---------------|--------------------|
| 2        | 128.2, C              |                                     | H-8, H-8'     |                    |
| 3        | 114.2, C              |                                     | H-8           |                    |
| 3a       | 128.2, C              |                                     | H-8           |                    |
| 4        | 120.9, CH             | 7.48, d (8.0)                       |               | H-8 $\alpha$       |
| 5        | 123.7, CH             | 7.20, dd (8.0, 1.6)                 |               |                    |
| 6        | 115.5, C              |                                     | H-4, H-5, H-7 |                    |
| 7        | 115.2, CH             | 7.48, d (1.6)                       |               |                    |
| 7a       | 139.9, C              |                                     | H-4, H-7      |                    |
| 8        | 32.8, CH <sub>2</sub> | 3.13, d (16.4)<br>3.56, d (16.4)    |               | H-4<br>H-8'        |
| 9        | 71.5, C               |                                     | H-8, H-8'     |                    |
| 11       | 157.9, C              |                                     |               |                    |
| 13       | 174.6, C              |                                     | H-8           |                    |
| 2'       | 123.0, CH             | 7.05, s                             |               | H-15'              |
| 3'       | 106.5, C              |                                     | H-2', H-8'    |                    |
| 3a'      | 129.6, C              |                                     | H-2', H-8'    |                    |
| 4'       | 118.8, CH             | 7.64, d (8.0)                       |               | H-14'              |
| 5'       | 120.2, CH             | 7.02, t (8.0)                       |               |                    |
| 6'       | 122.5, CH             | 7.08, t (8.0)                       |               |                    |
| 7'       | 112.2, CH             | 7.29, d (8.0)                       |               |                    |
| 7a'      | 136.4, C              |                                     | H-4', H-7'    |                    |
| 8'       | 40.7, CH              | 4.43, s                             |               | H-8 $\beta$ , H14' |
| 9'       | 71.0, C               |                                     | H-8', H-14'   |                    |
| 11'      | 157.9, C              |                                     | H-14', H-15'  |                    |
| 13'      | 174.6, C              |                                     | H-8', H-15'   |                    |
| 14'      | 26.0, CH <sub>3</sub> | 2.86, s                             |               | H-4', H-8'         |
| 15'      | 25.0, CH <sub>3</sub> | 2.88, s                             |               | H-2'               |

**Table S5.**  $^1\text{H}$  and  $^{13}\text{C}$  NMR Spectroscopic Data (500 MHz) for Dictazoline C-E (**5-7**) in  $\text{MeOH-}d_4$ 

| Dictazoline C |                       |                                              | Dictazoline D         |                                              |                       | Dictazoline E                                |                     |                                              |
|---------------|-----------------------|----------------------------------------------|-----------------------|----------------------------------------------|-----------------------|----------------------------------------------|---------------------|----------------------------------------------|
| C/H           | $\delta_{\text{C}}$   | $\delta_{\text{H}}$ , mult ( <i>J</i> in Hz) | $\delta_{\text{C}}$   | $\delta_{\text{H}}$ , mult ( <i>J</i> in Hz) | $\delta_{\text{C}}$   | $\delta_{\text{H}}$ , mult ( <i>J</i> in Hz) | $\delta_{\text{C}}$ | $\delta_{\text{H}}$ , mult ( <i>J</i> in Hz) |
| 2             | 128.2, C              |                                              | 129.1, C              |                                              | 127.9, C              |                                              |                     |                                              |
| 3             | 114.2, C              |                                              | 112.5, C              |                                              | 112.4, C              |                                              |                     |                                              |
| 3a            | 128.2, C              |                                              | 126.5, C              |                                              | 127.8, C              |                                              |                     |                                              |
| 4             | 120.9, CH             | 7.48, d (8.0)                                | 120.9, CH             | 7.48, d (8.4)                                | 119.6, CH             | 7.54, (d, 7.9)                               |                     |                                              |
| 5             | 123.7, CH             | 7.20, dd (8.0, 1.6)                          | 123.8, CH             | 7.21, d (8.4)                                | 120.6, CH             | 7.09, (t, 7.9)                               |                     |                                              |
| 6             | 115.5, C              |                                              | 116.0, C              |                                              | 124.4, CH             | 7.20, (t, 7.9)                               |                     |                                              |
| 7             | 115.2, CH             | 7.48, d (1.6)                                | 115.2, CH             | 7.50, br. s                                  | 112.6, CH             | 7.33, (d, 7.9)                               |                     |                                              |
| 7a            | 139.9, C              |                                              | 139.0, C              |                                              | 139.5, C              |                                              |                     |                                              |
| 8             | 32.8, CH <sub>2</sub> | 3.13, d (16.4)<br>3.56, d (16.4)             | 31.9, CH <sub>2</sub> | 3.33, d (16.4)<br>3.68, d (16.4)             | 32.5, CH <sub>2</sub> | 3.28, (d, 15.5)<br>3.67, (d, 15.5)           |                     |                                              |
| 9             | 71.5, C               |                                              | 69.0, C               |                                              | 69.0, C               |                                              |                     |                                              |
| 11            | 157.9, C              |                                              | 159.5, C              |                                              | 159.4, C              |                                              |                     |                                              |
| 13            | 174.6, C              |                                              | 174.8, C              |                                              | 175.6, C              |                                              |                     |                                              |
| 14            |                       |                                              |                       |                                              |                       |                                              |                     |                                              |
| 15            |                       |                                              | 25.4, CH <sub>3</sub> | 2.71, s                                      | 25.6, CH <sub>3</sub> | 2.68, s                                      |                     |                                              |
| 2'            | 123.0, CH             | 7.05, s                                      | 123.0, CH             | 7.07, s                                      | 123.2, CH             | 7.06, s                                      |                     |                                              |
| 3'            | 106.5, C              |                                              | 106.2, C              |                                              | 106.2, C              |                                              |                     |                                              |
| 3a'           | 129.6, C              |                                              | 128.5, C              |                                              | 129.3, C              |                                              |                     |                                              |
| 4'            | 118.8, CH             | 7.64, d (8.0)                                | 118.6, CH             | 7.62, d (7.9)                                | 118.9, CH             | 7.61, (d, 7.8)                               |                     |                                              |
| 5'            | 120.2, CH             | 7.02, t (8.0)                                | 120.5, CH             | 7.06, t (7.9)                                | 120.6, CH             | 7.05, (t, 7.8)                               |                     |                                              |
| 6'            | 122.5, CH             | 7.08, t (8.0)                                | 123.2, CH             | 7.12, t (7.9)                                | 123.2, CH             | 7.11, (t, 7.8)                               |                     |                                              |
| 7'            | 112.2, CH             | 7.29, d (8.0)                                | 112.1, CH             | 7.32, d (7.9)                                | 112.6, CH             | 7.31, (d, 7.8)                               |                     |                                              |
| 7a'           | 136.4, C              |                                              | 136.5, C              |                                              | 136.8, C              |                                              |                     |                                              |
| 8'            | 40.7, CH              | 4.43, s                                      | 41.6, CH              | 4.54, s                                      | 42.0, CH              | 4.51, s                                      |                     |                                              |
| 9'            | 71.0, C               |                                              | 70.3, C               |                                              | 71.1, C               |                                              |                     |                                              |
| 11'           | 157.9, C              |                                              | 156.7, C              |                                              | 156.9, C              |                                              |                     |                                              |
| 13'           | 174.6, C              |                                              | 174.4, C              |                                              | 175.1, C              |                                              |                     |                                              |
| 14'           | 26.0, CH <sub>3</sub> | 2.86, s                                      | 25.8, CH <sub>3</sub> | 2.87, s                                      | 27.0, CH <sub>3</sub> | 2.86, s                                      |                     |                                              |
| 15'           | 25.0, CH <sub>3</sub> | 2.88, s                                      | 26.8, CH <sub>3</sub> | 2.98, s                                      | 26.0, CH <sub>3</sub> | 2.97, s                                      |                     |                                              |

**Figure S1.**  $^1\text{H}$  NMR Spectrum at 500 MHz in  $\text{MeOH-}d_4$  of Dictazole A (**1**) with  $\text{H}_2\text{O}$  suppression

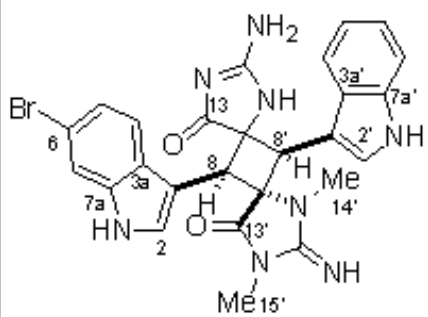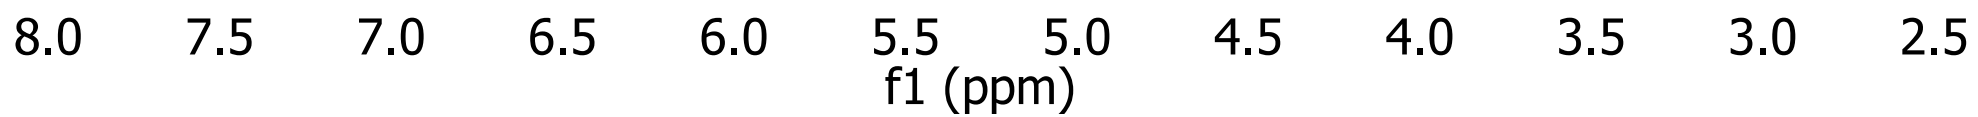

**Figure S2.**  $^1\text{H}$  NMR Spectrum at 500 MHz in  $\text{MeOH-}d_4$  of Dictazole A (**1**)

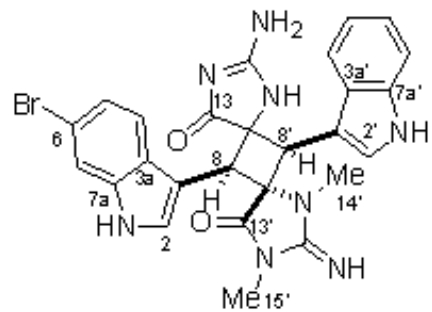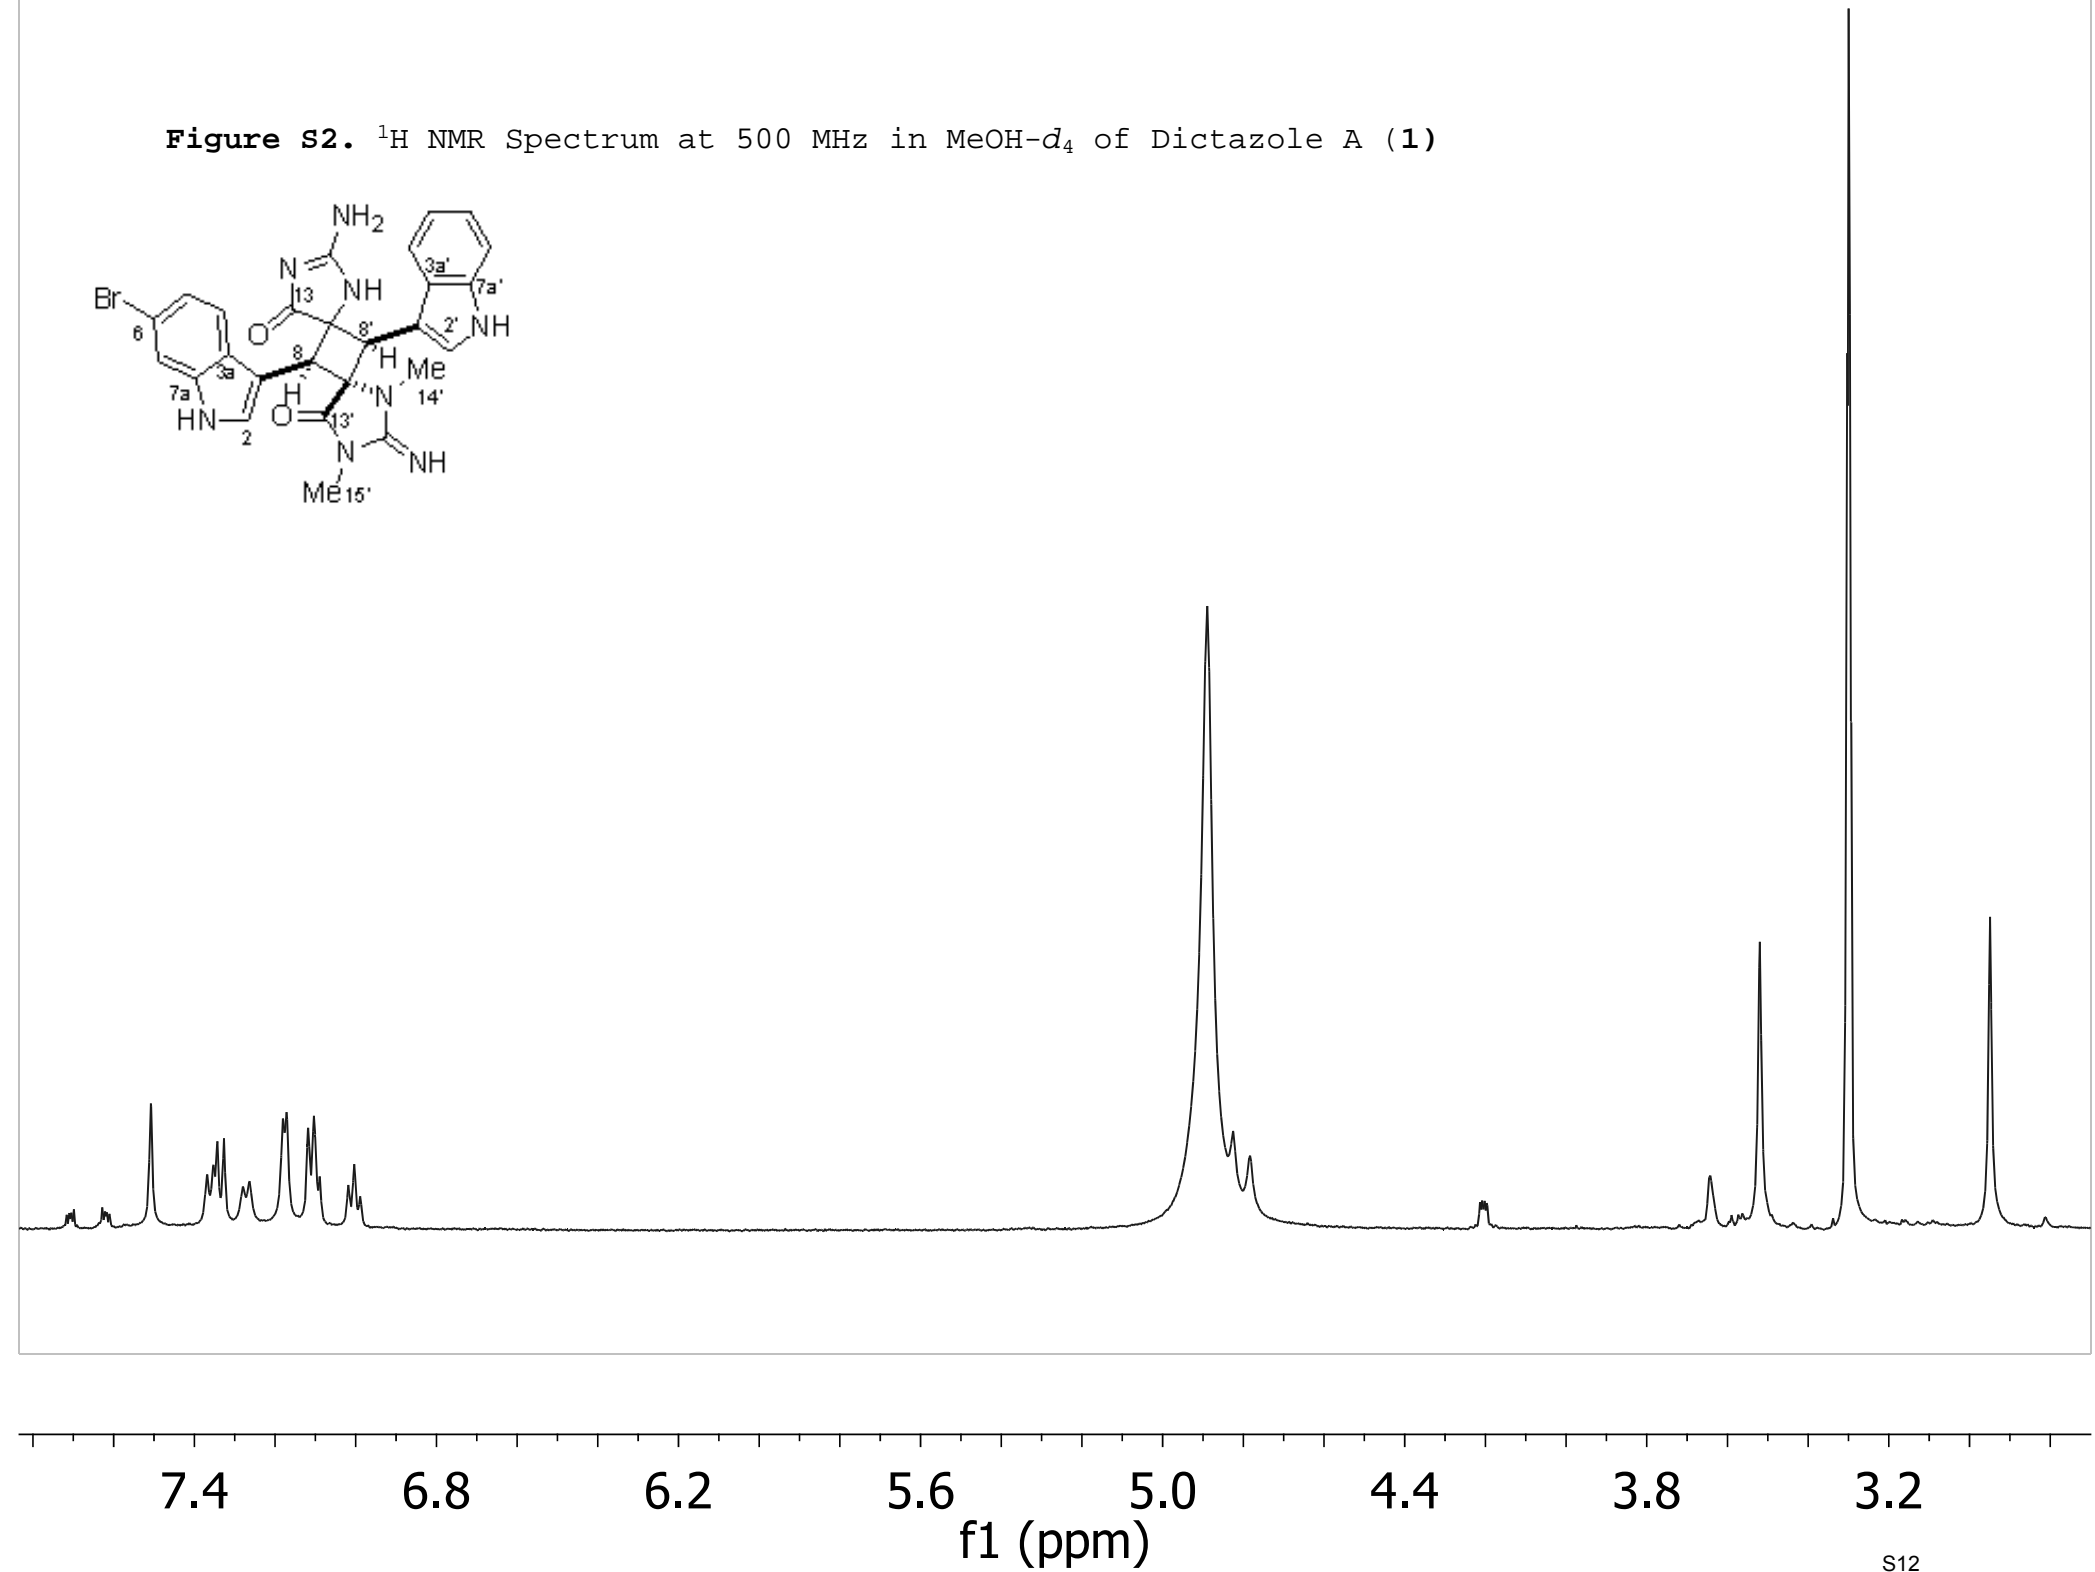

Figure S3.  $^{13}\text{C}$  NMR Spectrum at 125 MHz in  $\text{MeOH-d}_4$  of Dictazole A (1)

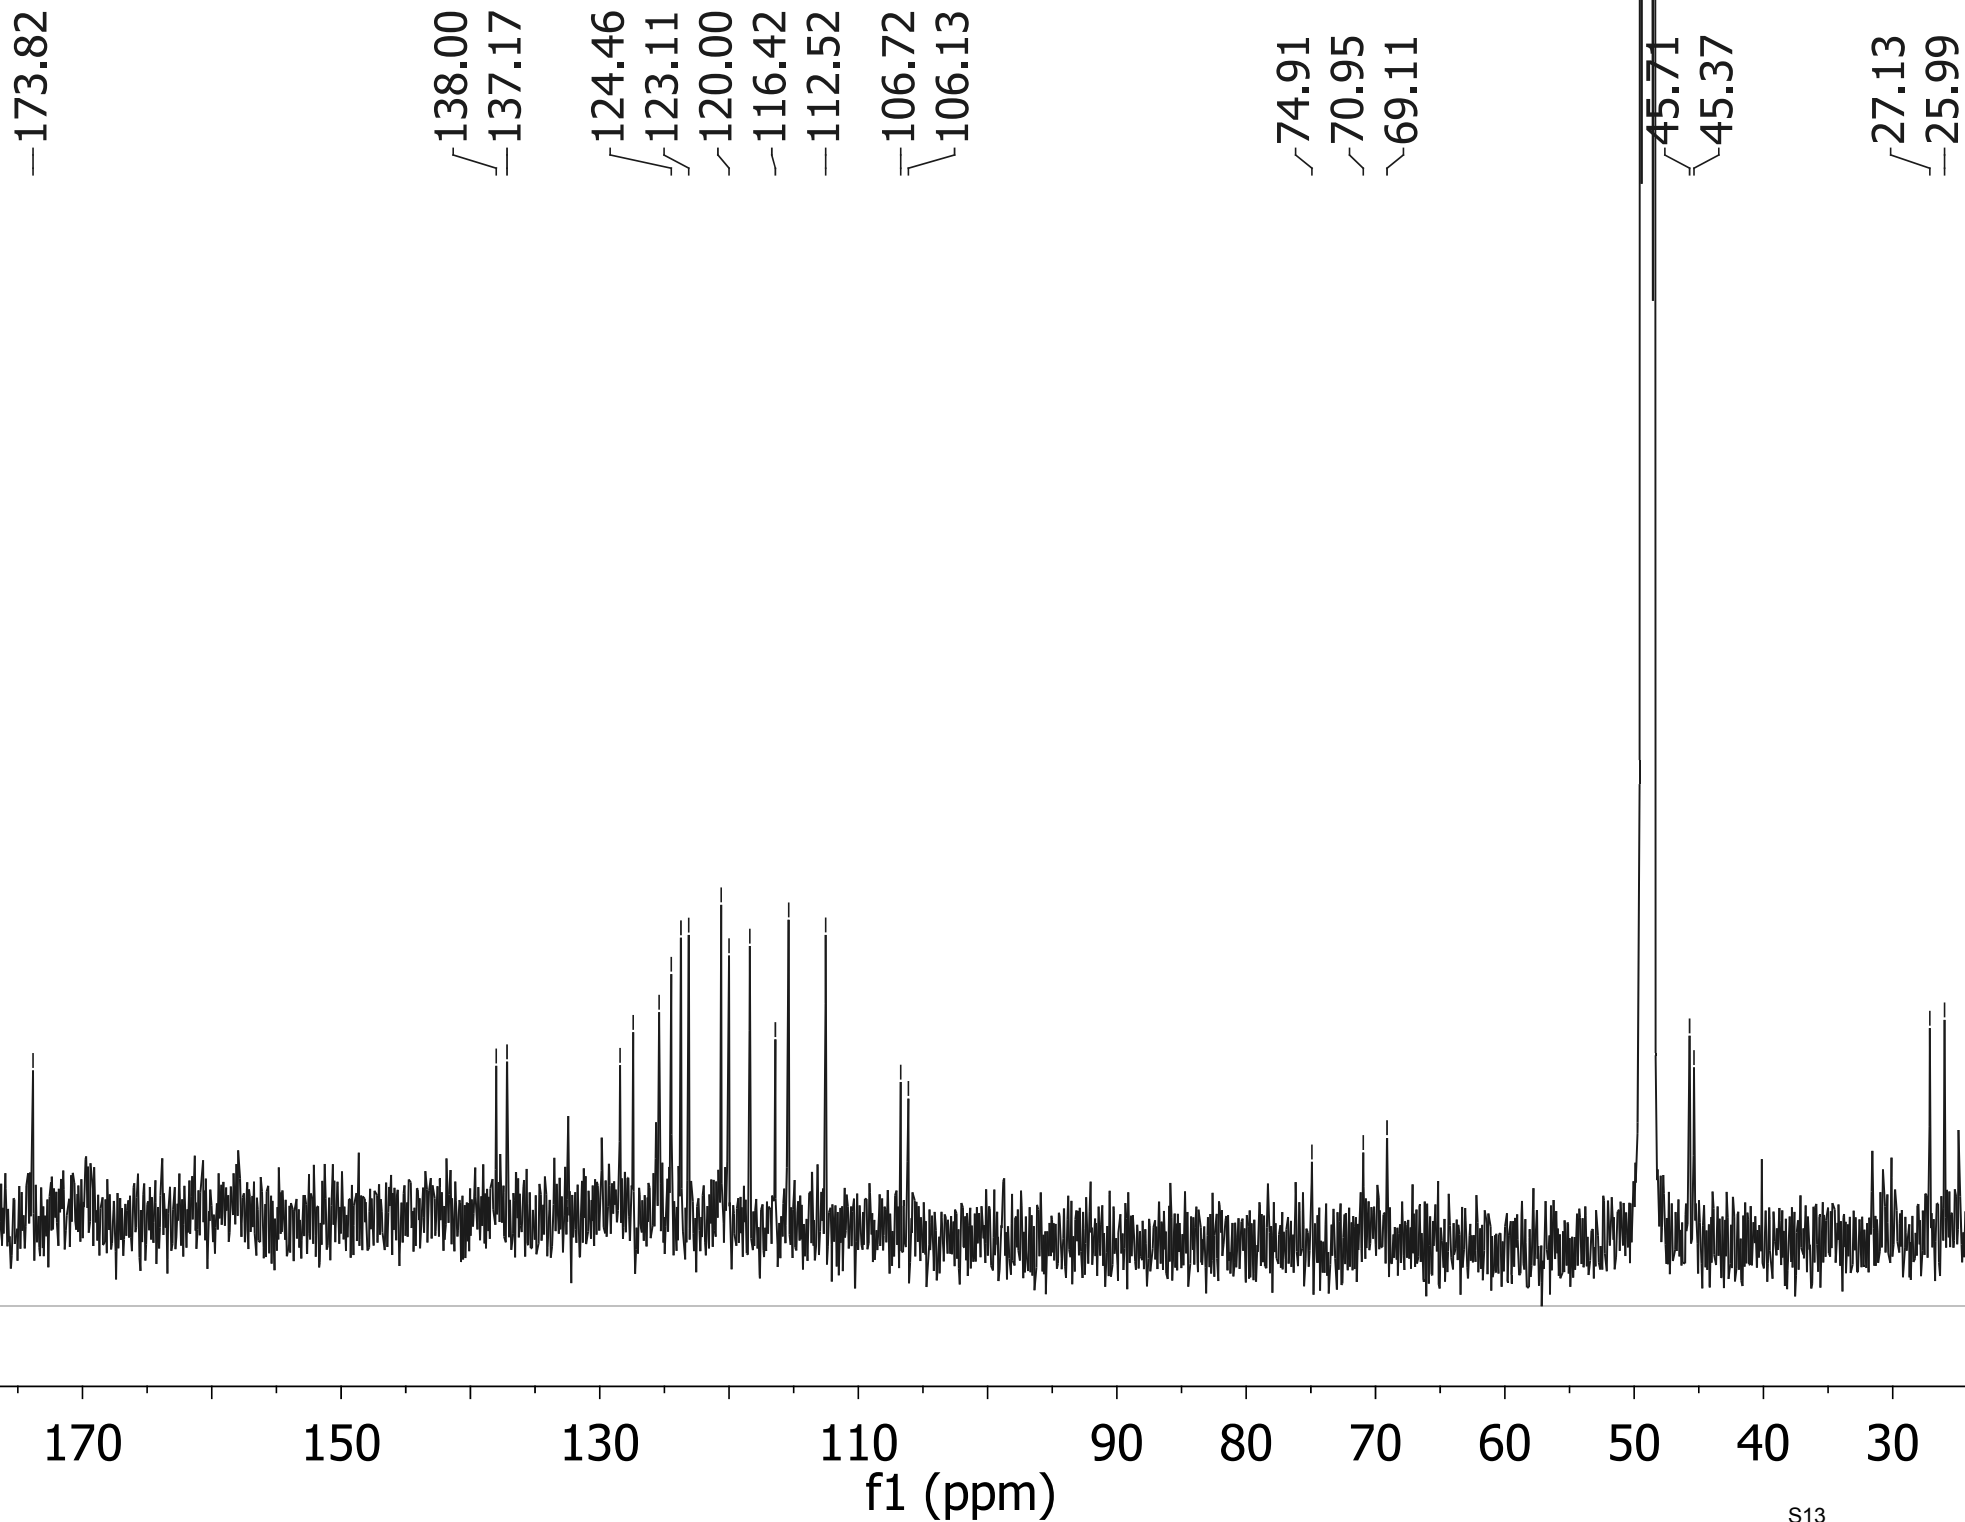

**Figure S4.** DEPT 90 NMR Spectrum at 125 MHz in MeOH- $d_4$  of Dictazole A (**1**)

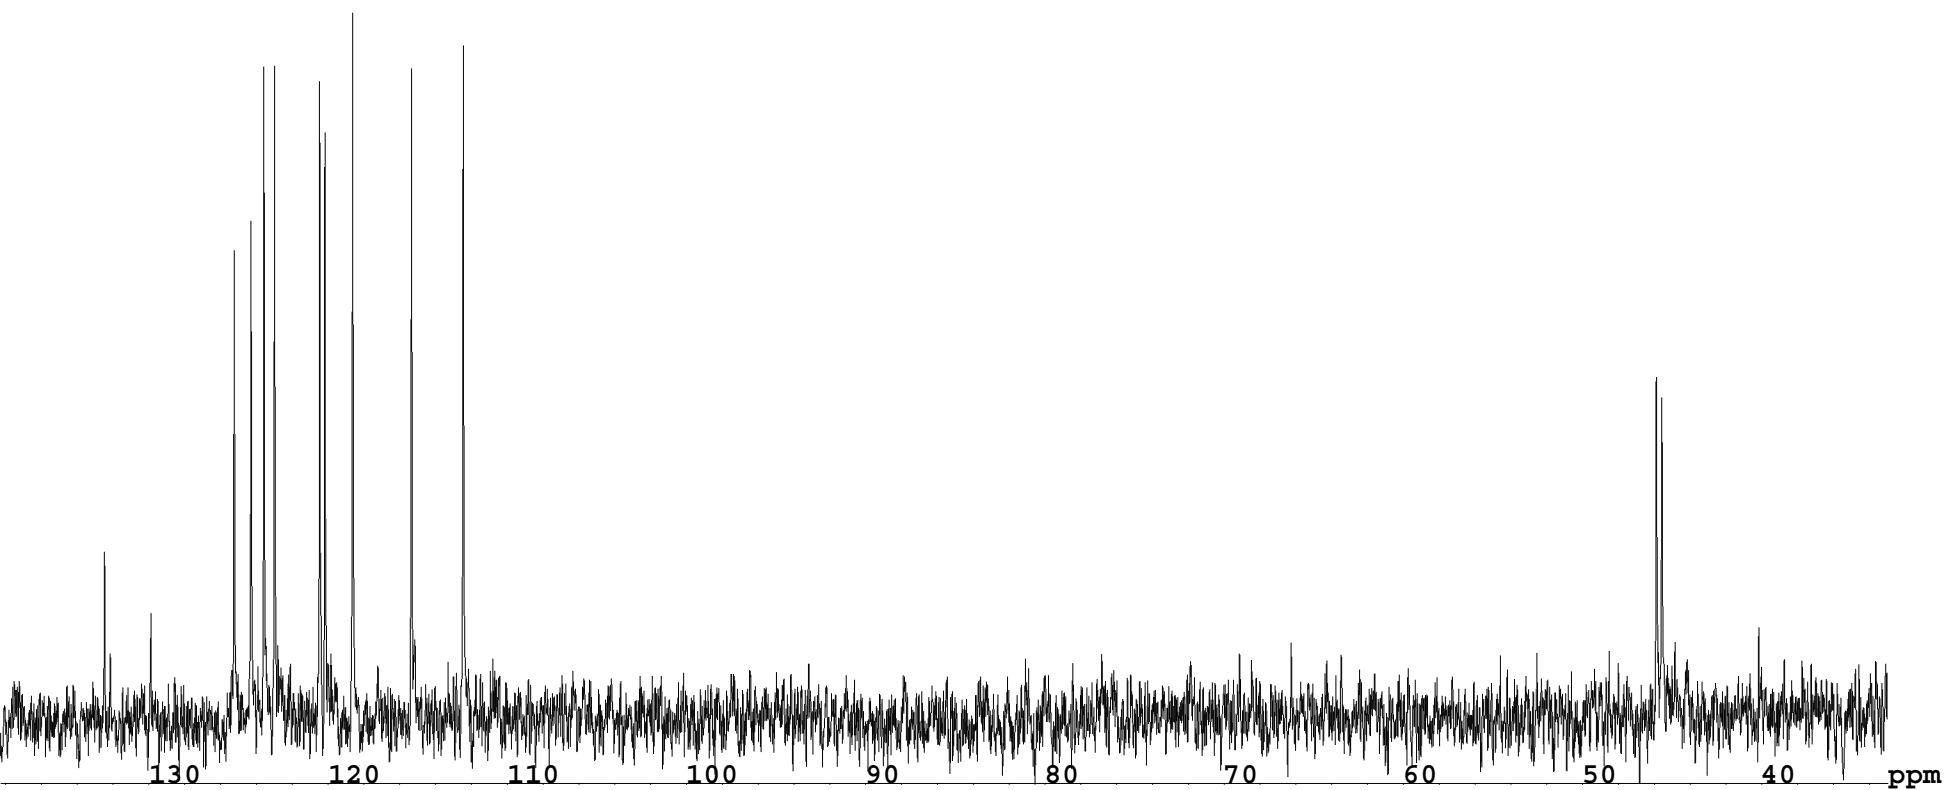

Figure S5. HSQC NMR Spectrum at 500 MHz in MeOH- $d_4$  of Dictazole A (1)

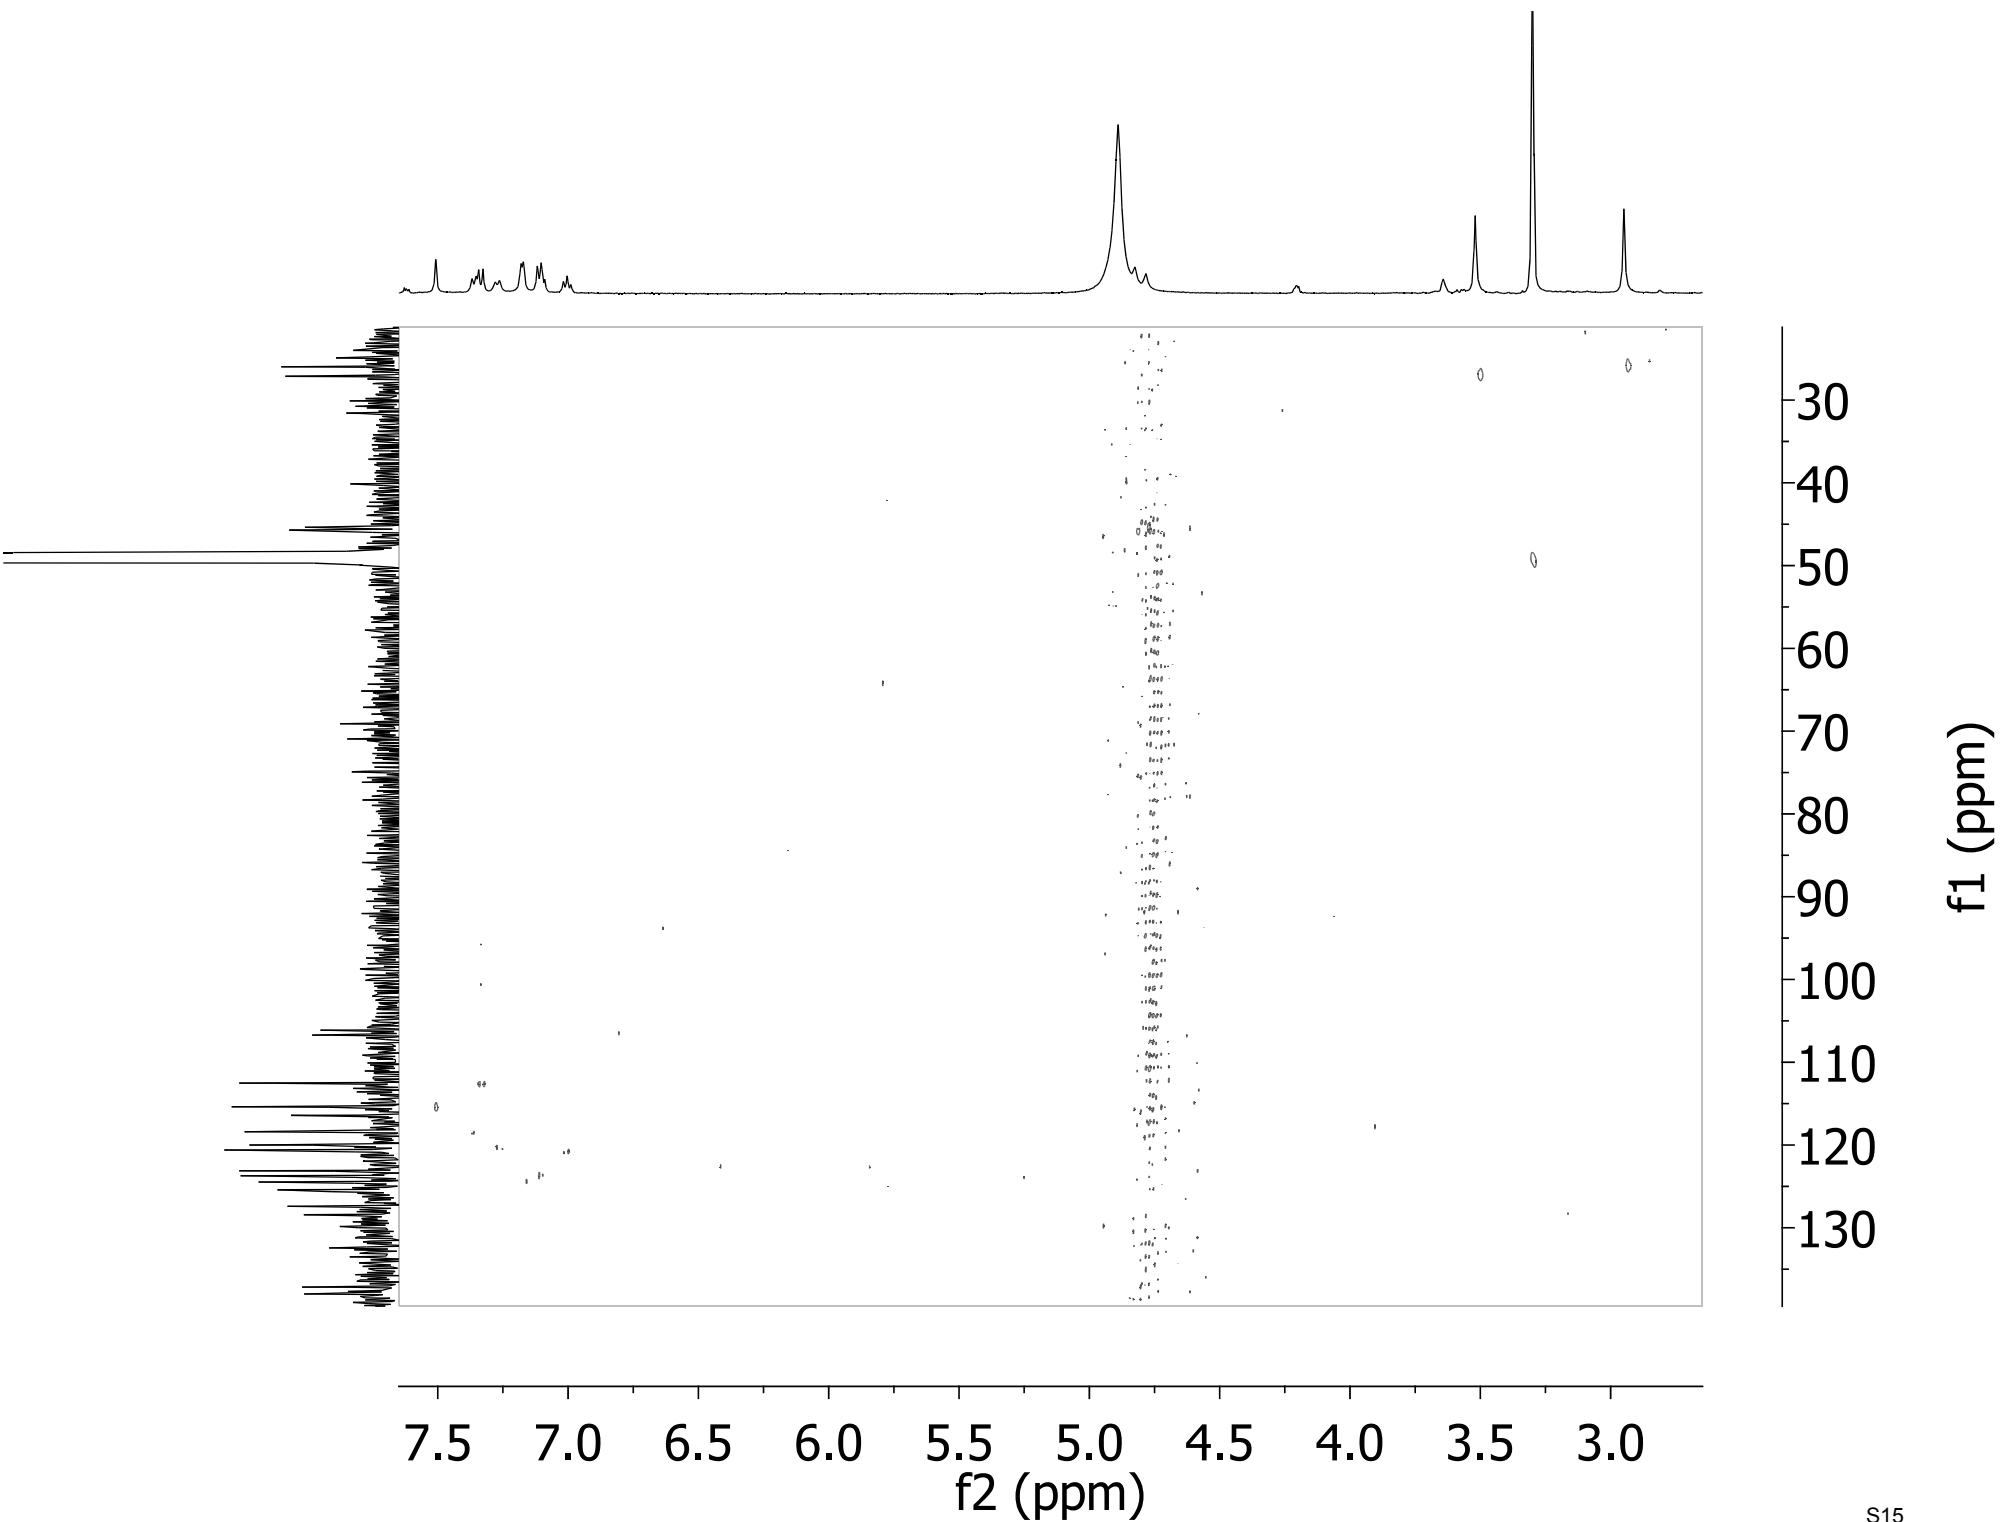

Figure S6. Expansion of HSQC NMR Spectrum at 500 MHz in MeOH- $d_4$  of Dictazole A (1)

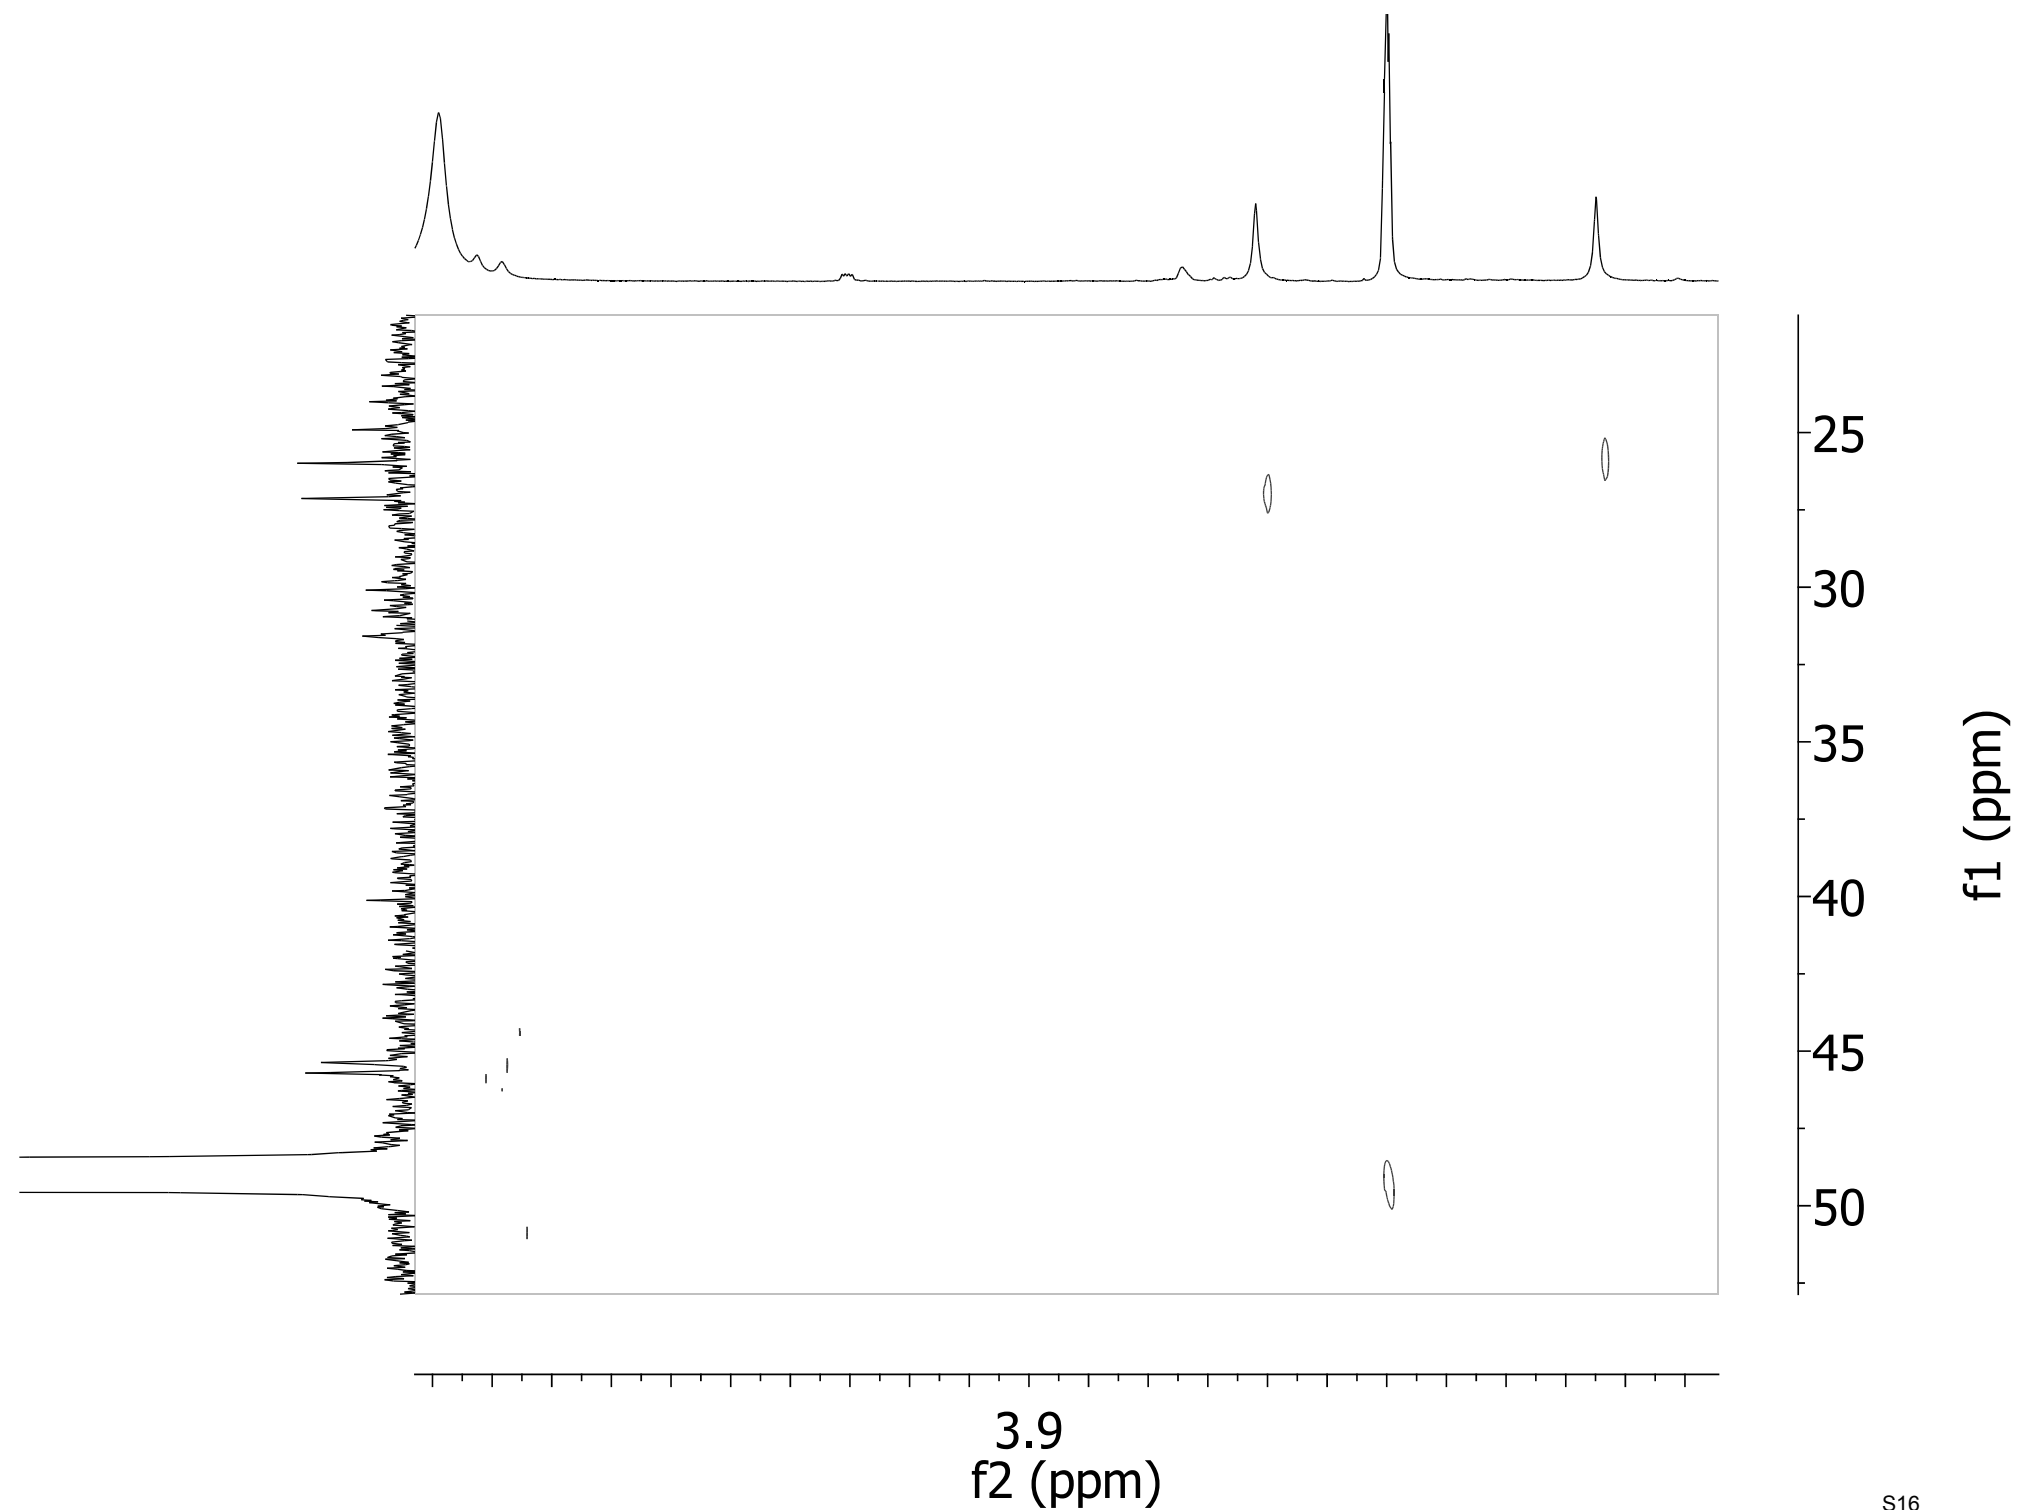



Figure S7. Expansion of HSQC NMR Spectrum at 500 MHz in MeOH- $d_4$  of Dictazole A (1)

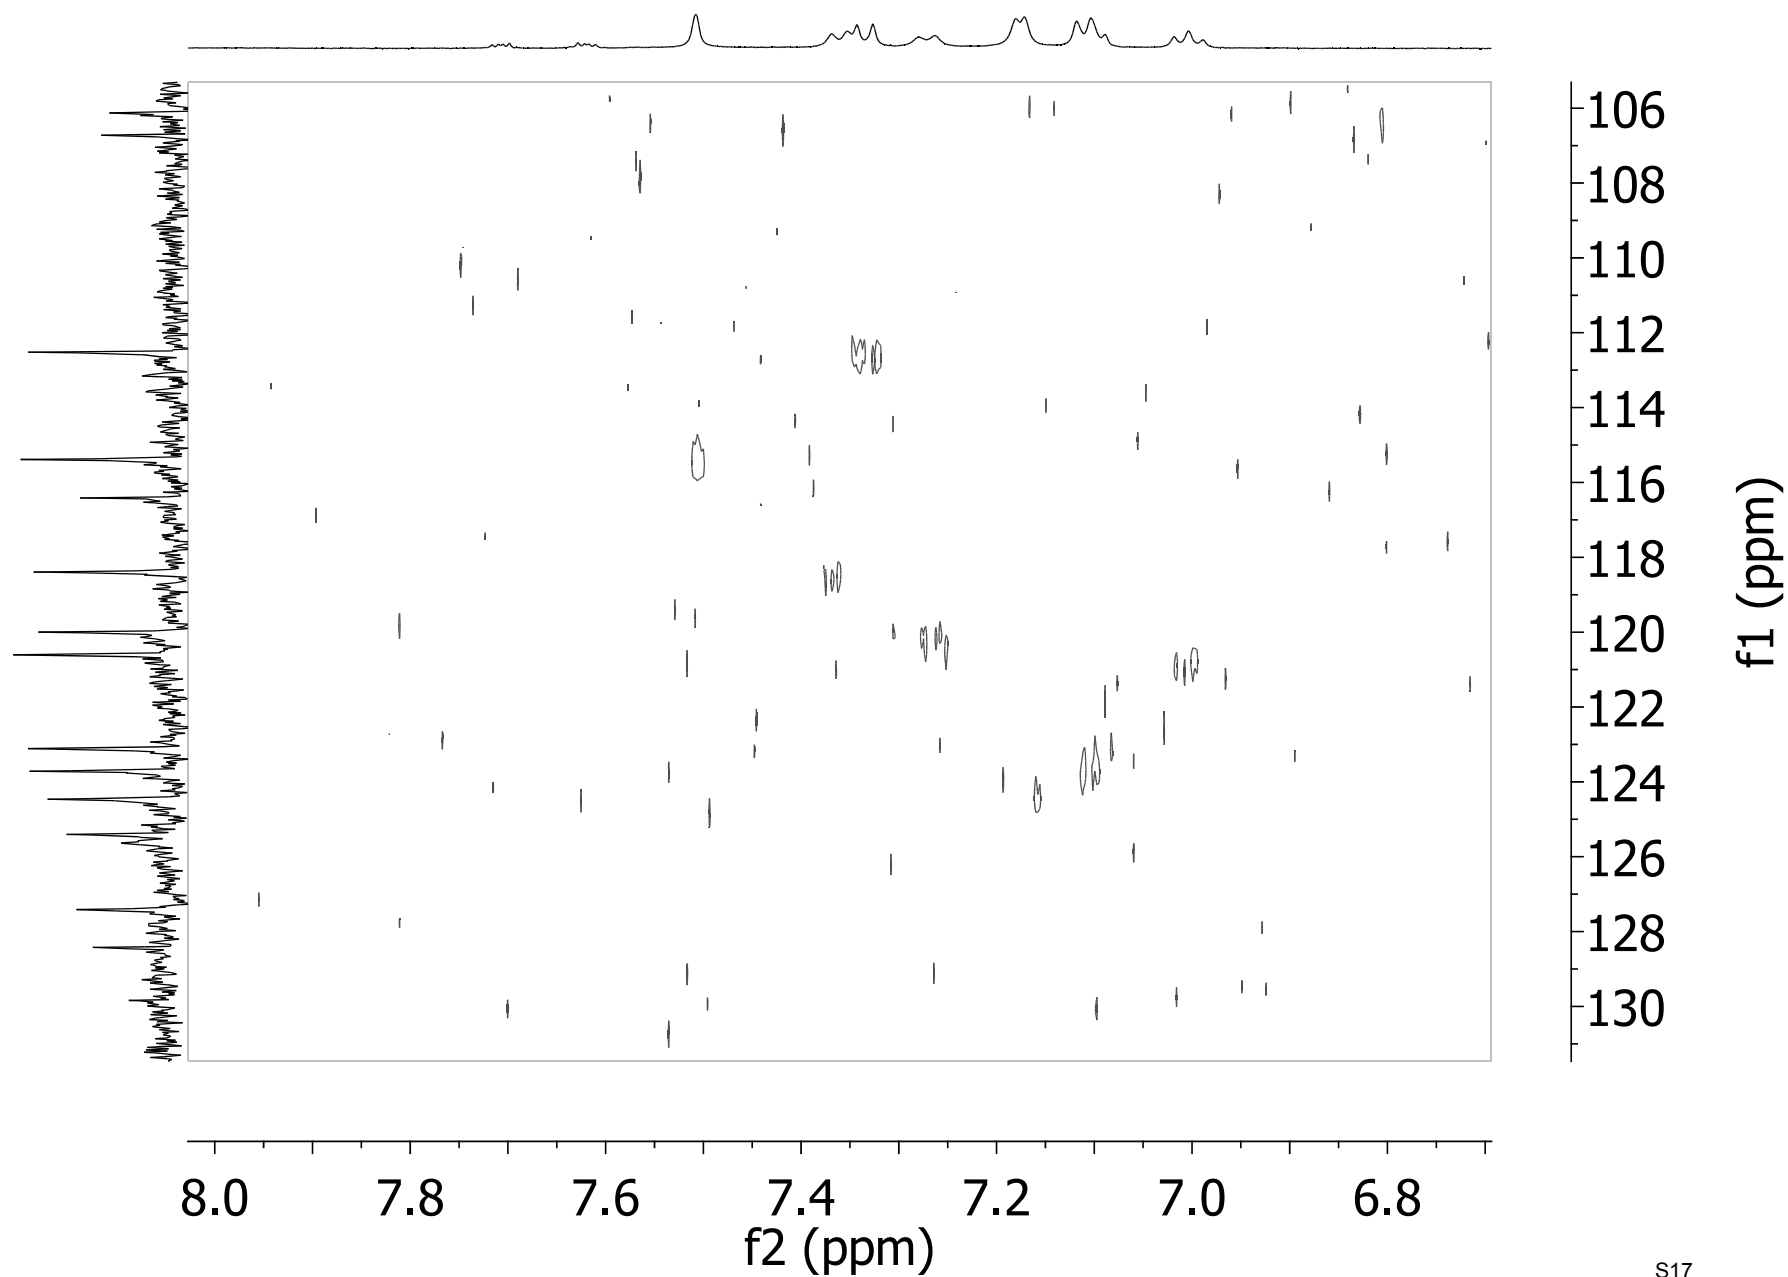

**Figure S8.** COSY NMR Spectrum at 500 MHz in MeOH- $d_4$  of Dictazole A (**1**)

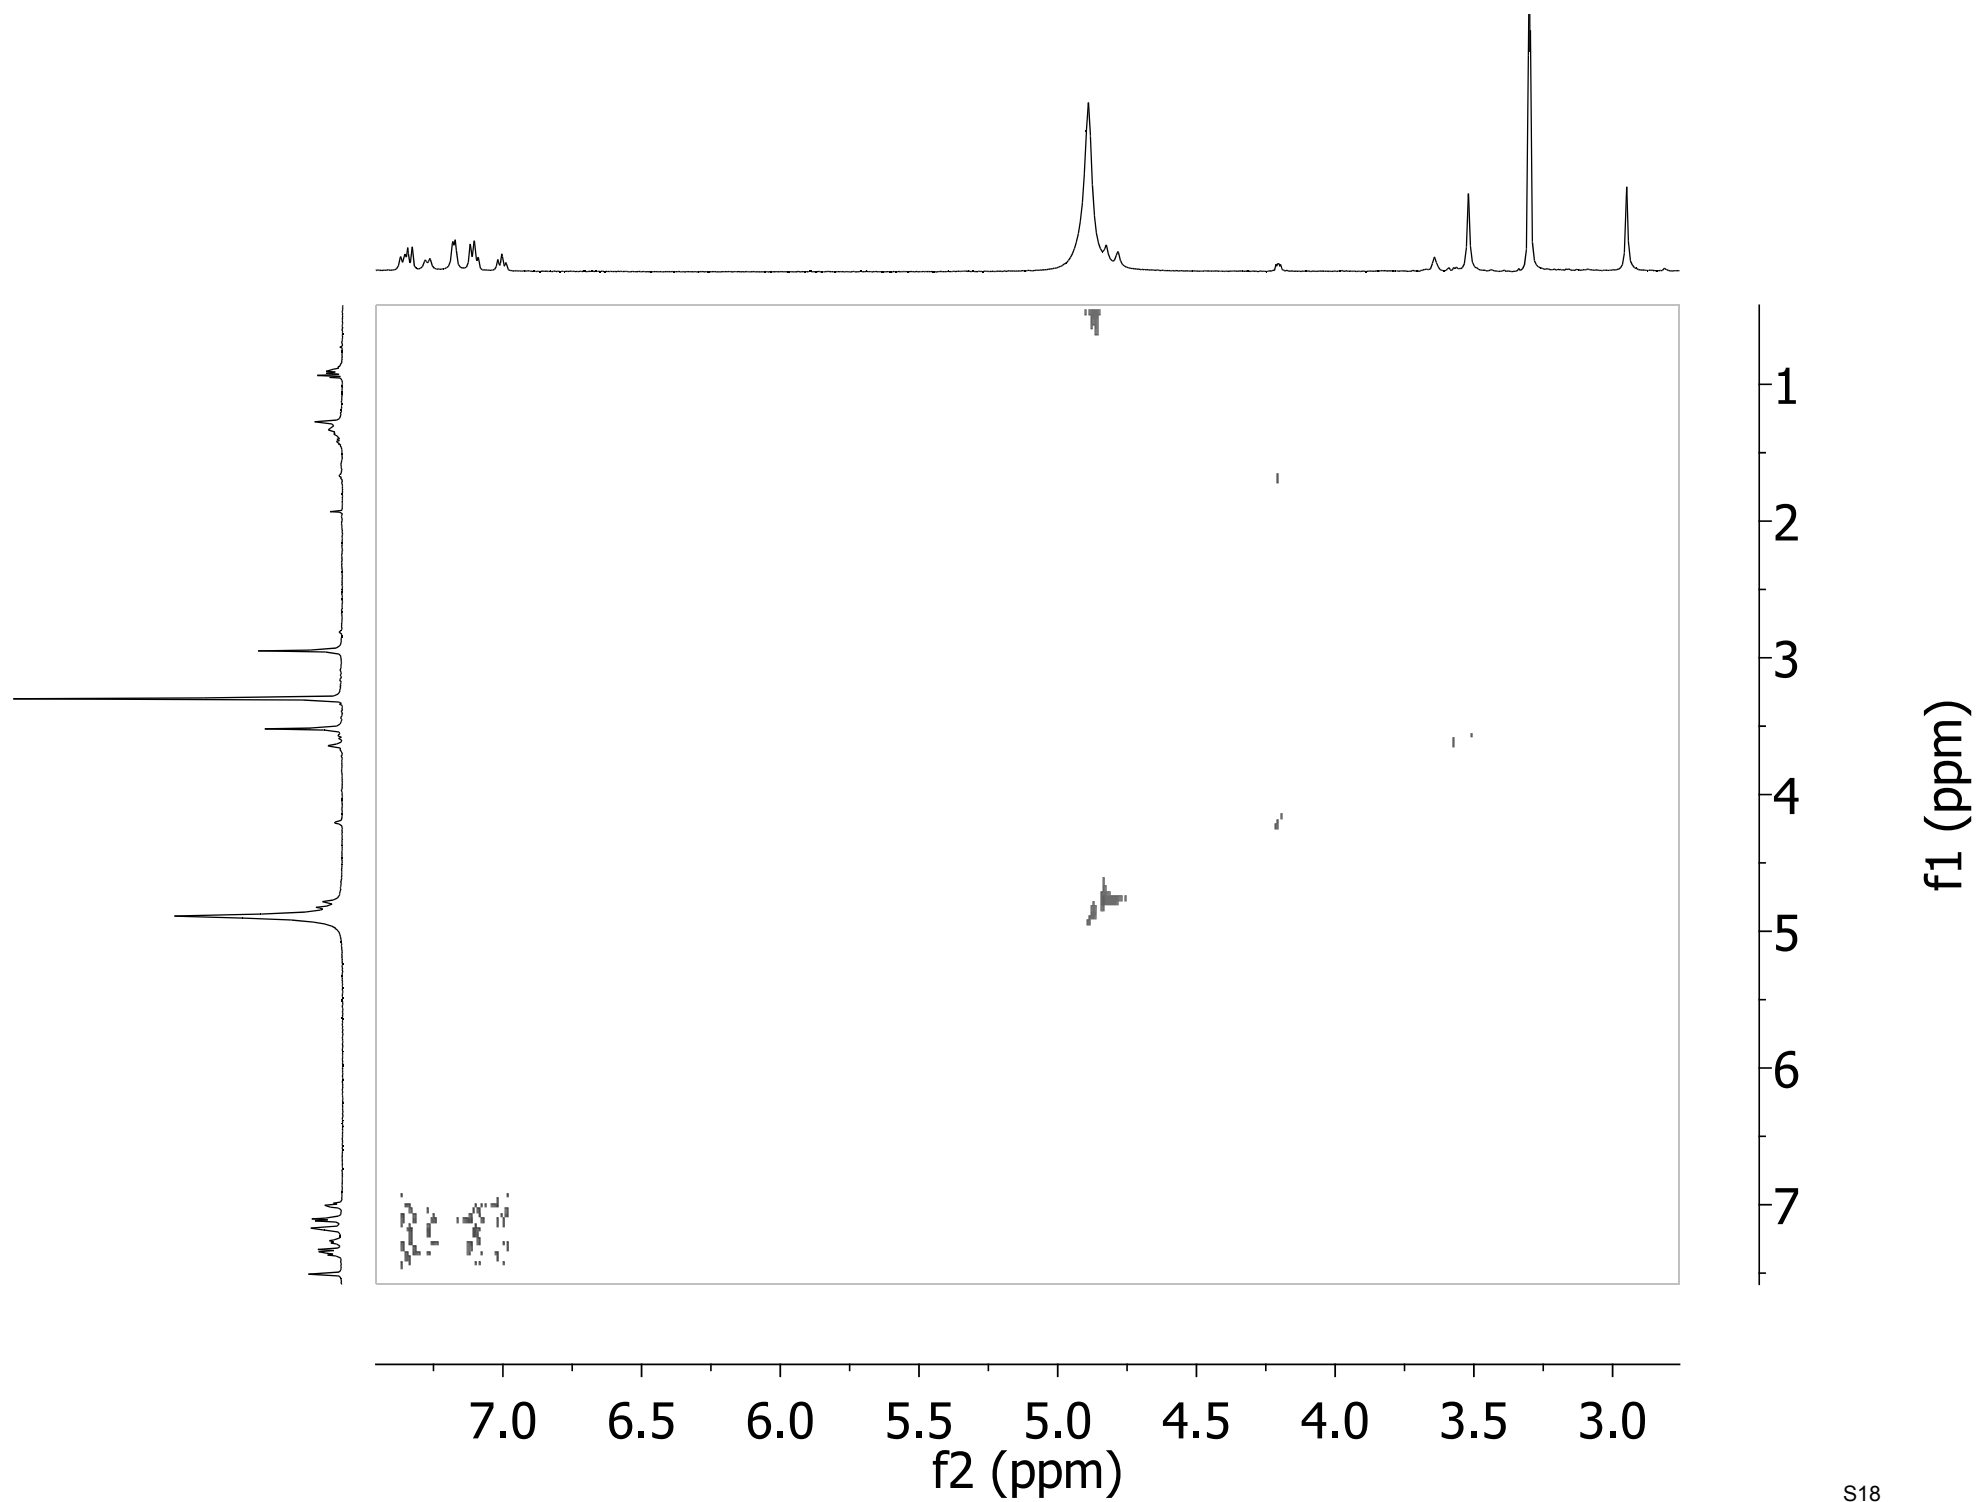

**Figure S9.** Expansion of COSY NMR Spectrum at 500 MHz in MeOH- $d_4$  of Dictazole A(1)

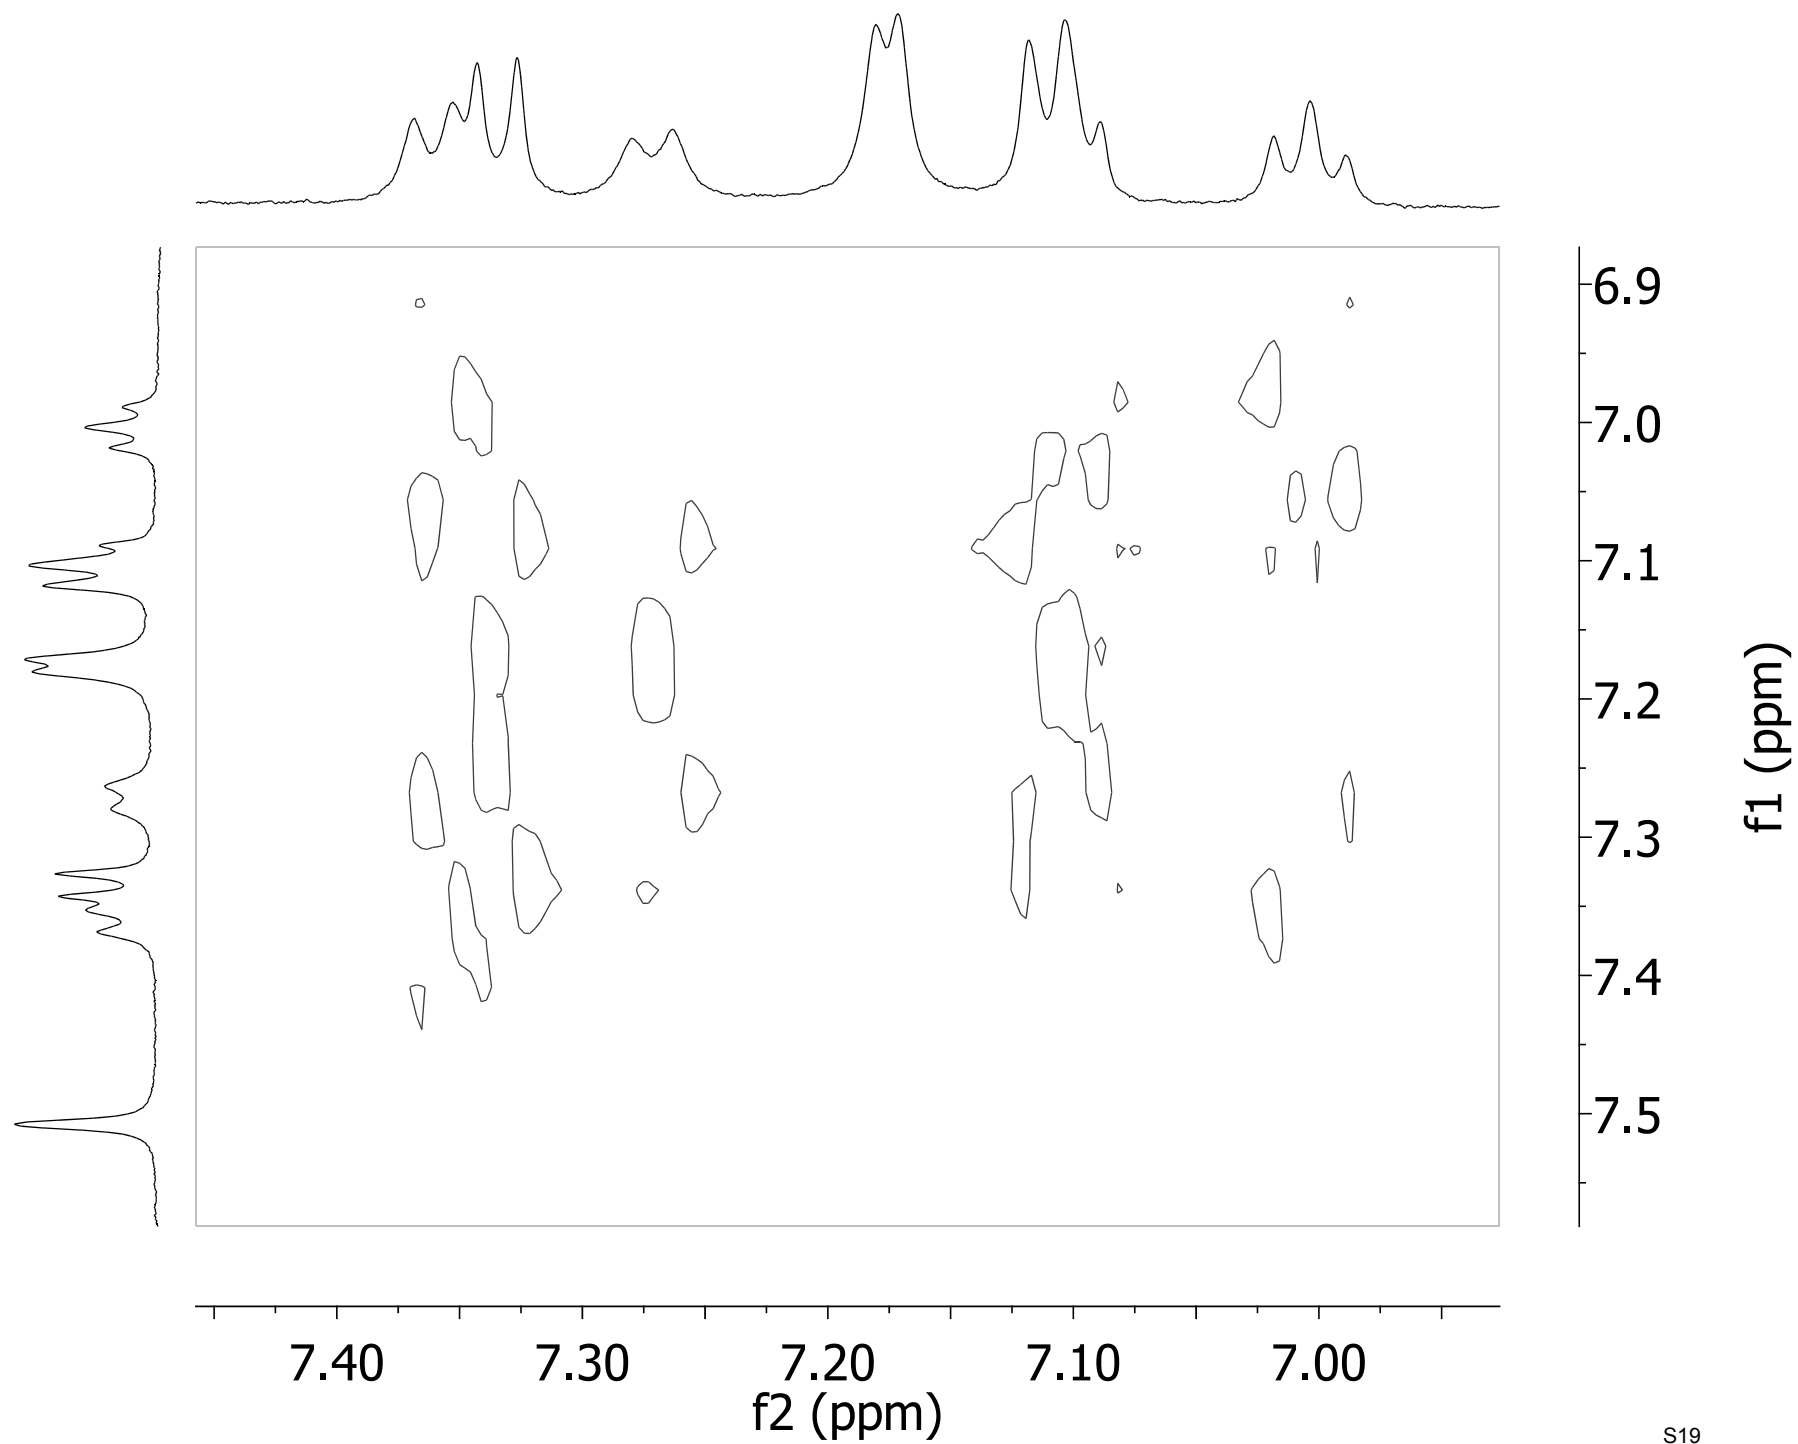

Figure S10. HMBC NMR Spectrum at 500 MHz in MeOH-*d*<sub>4</sub> of Dictazole A (1)

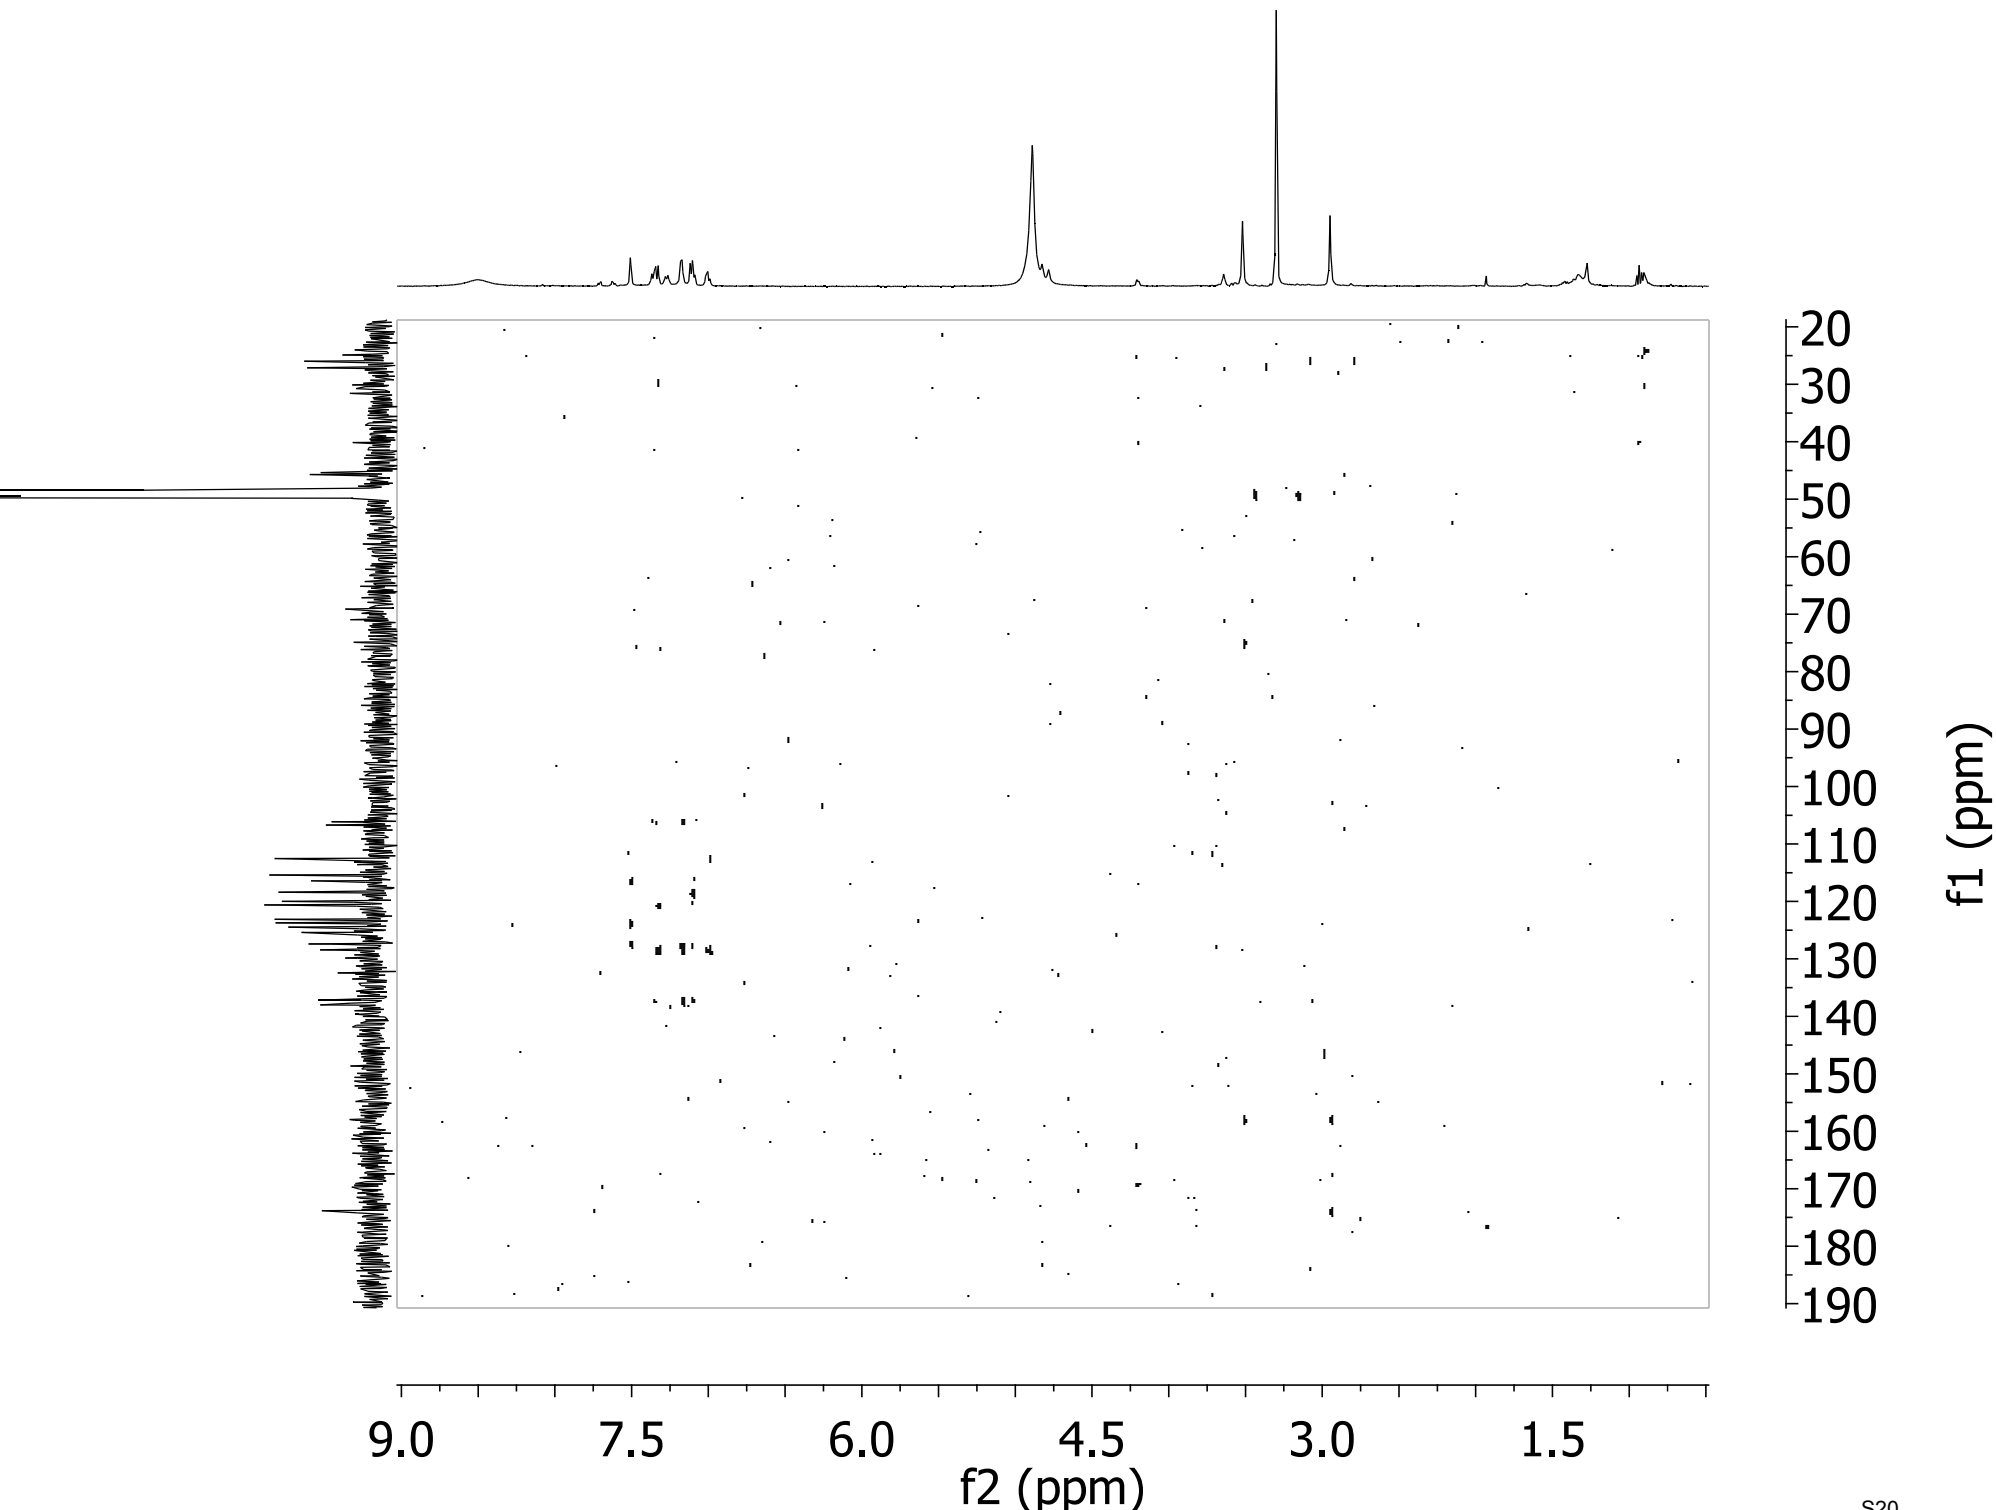

Figure S11. Expansion of HMBC NMR Spectrum at 500 MHz in MeOH- $d_4$  of Dictazole A (1)

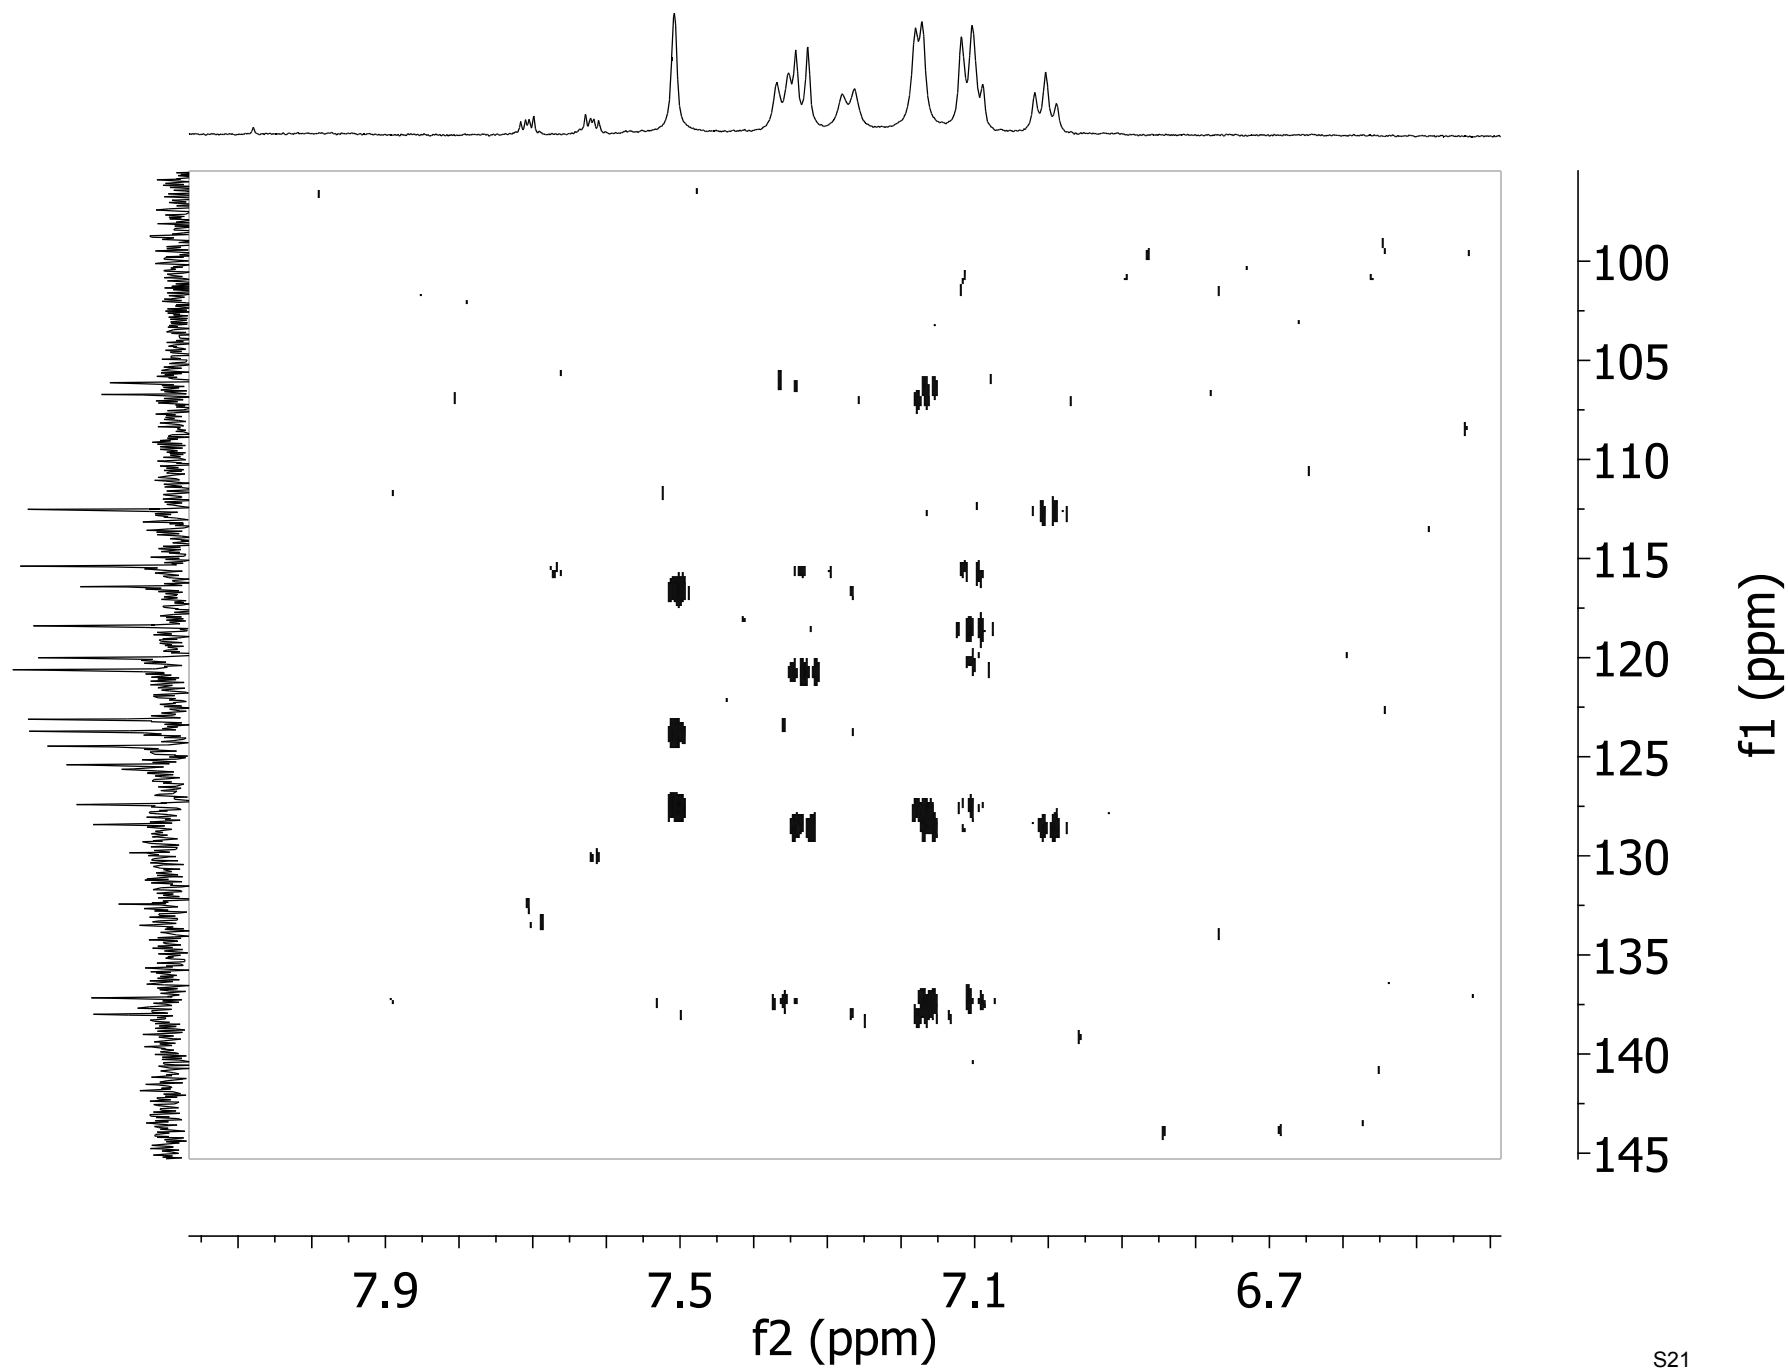

Figure S12. Expansion of HMBC NMR Spectrum at 500 MHz in MeOH- $d_4$  of Dictazole A(1)

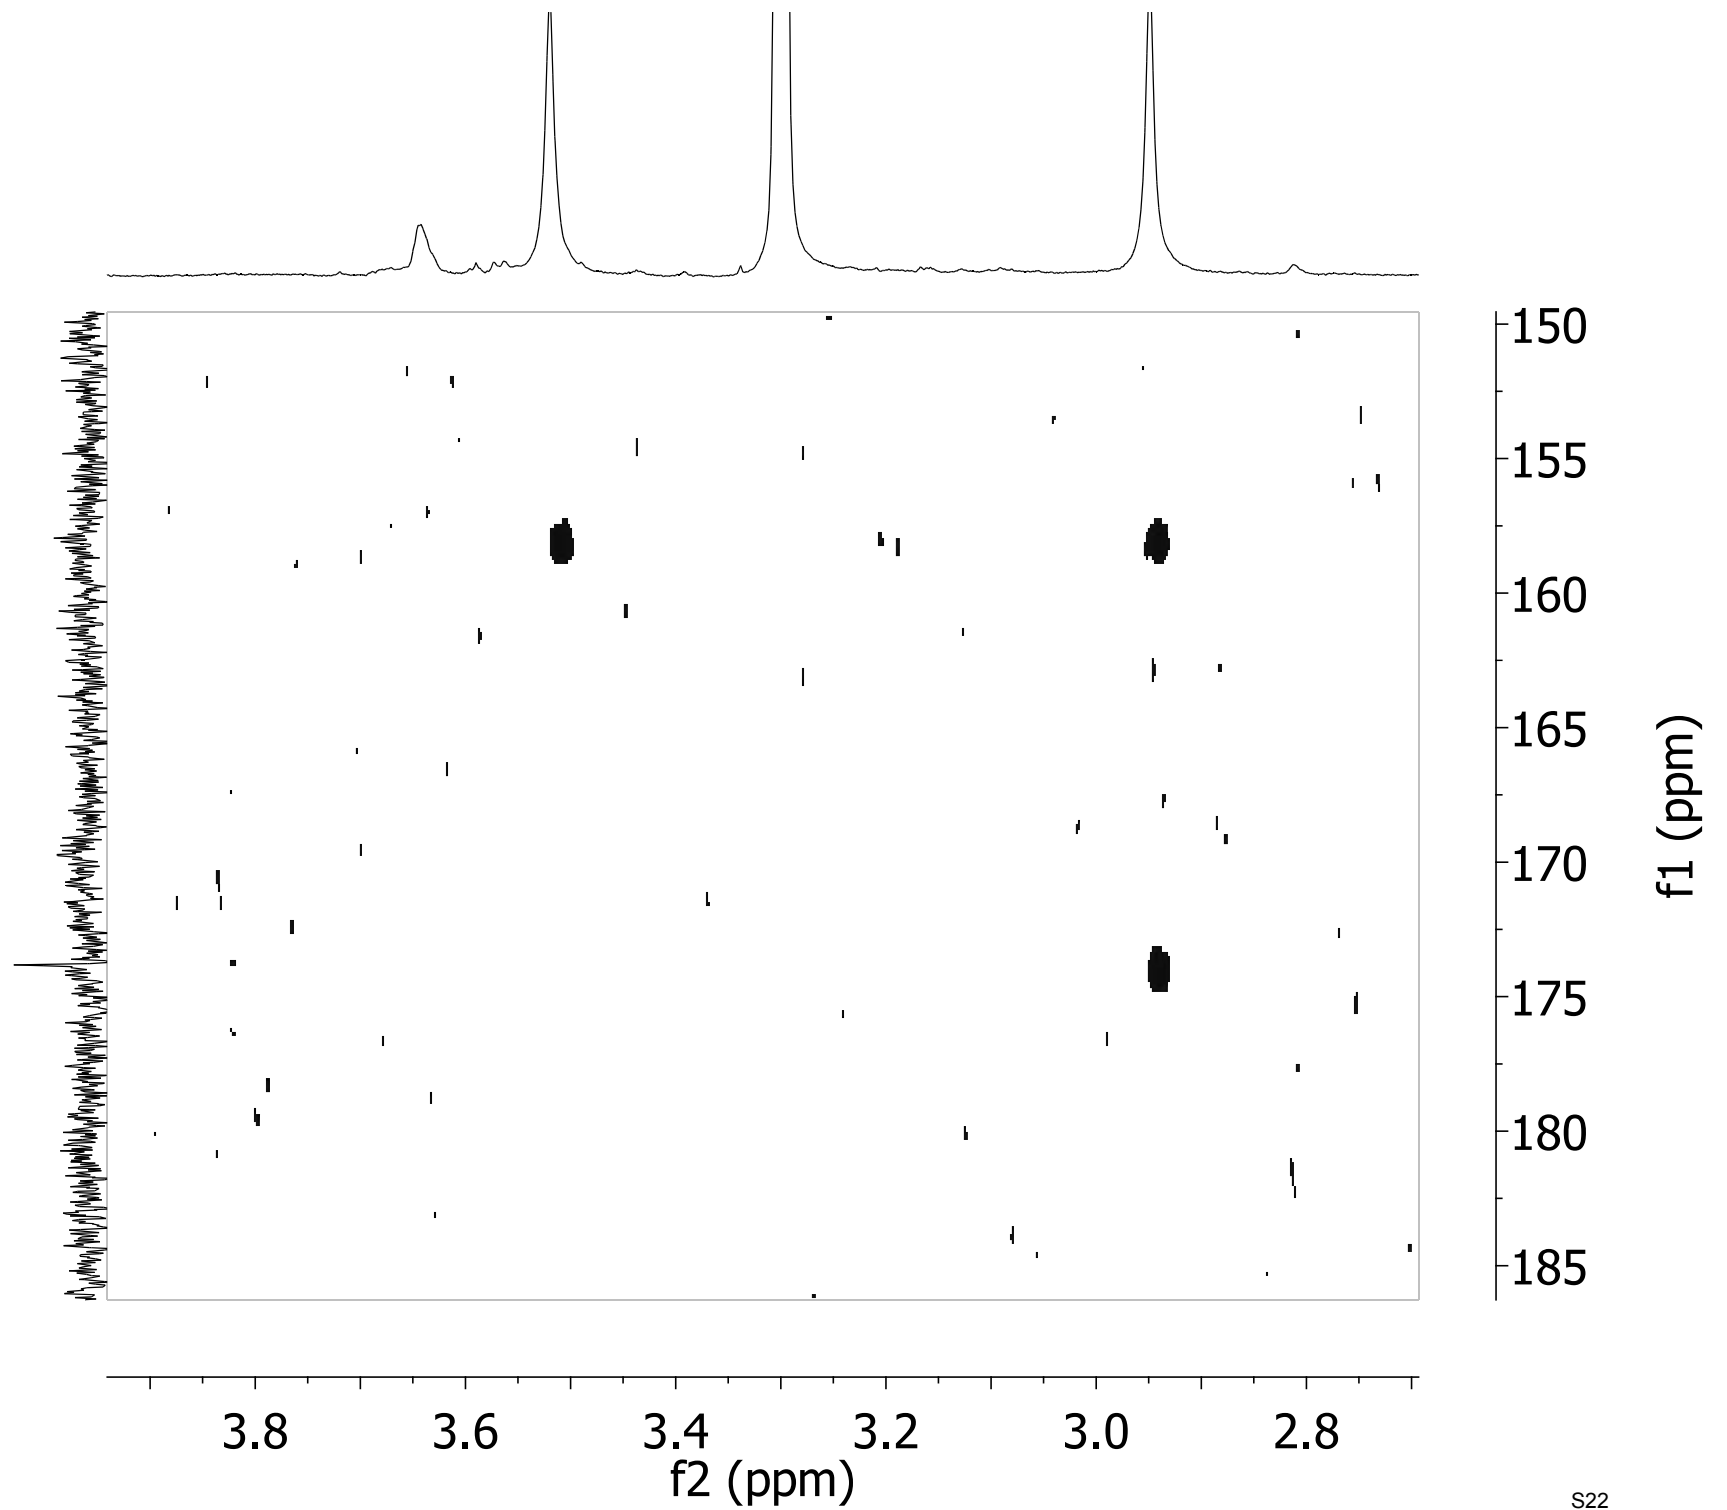

**Figure S13.** Expansion of HMBC NMR Spectrum at 500 MHz in MeOH- $d_4$  of Dictazole A (1)

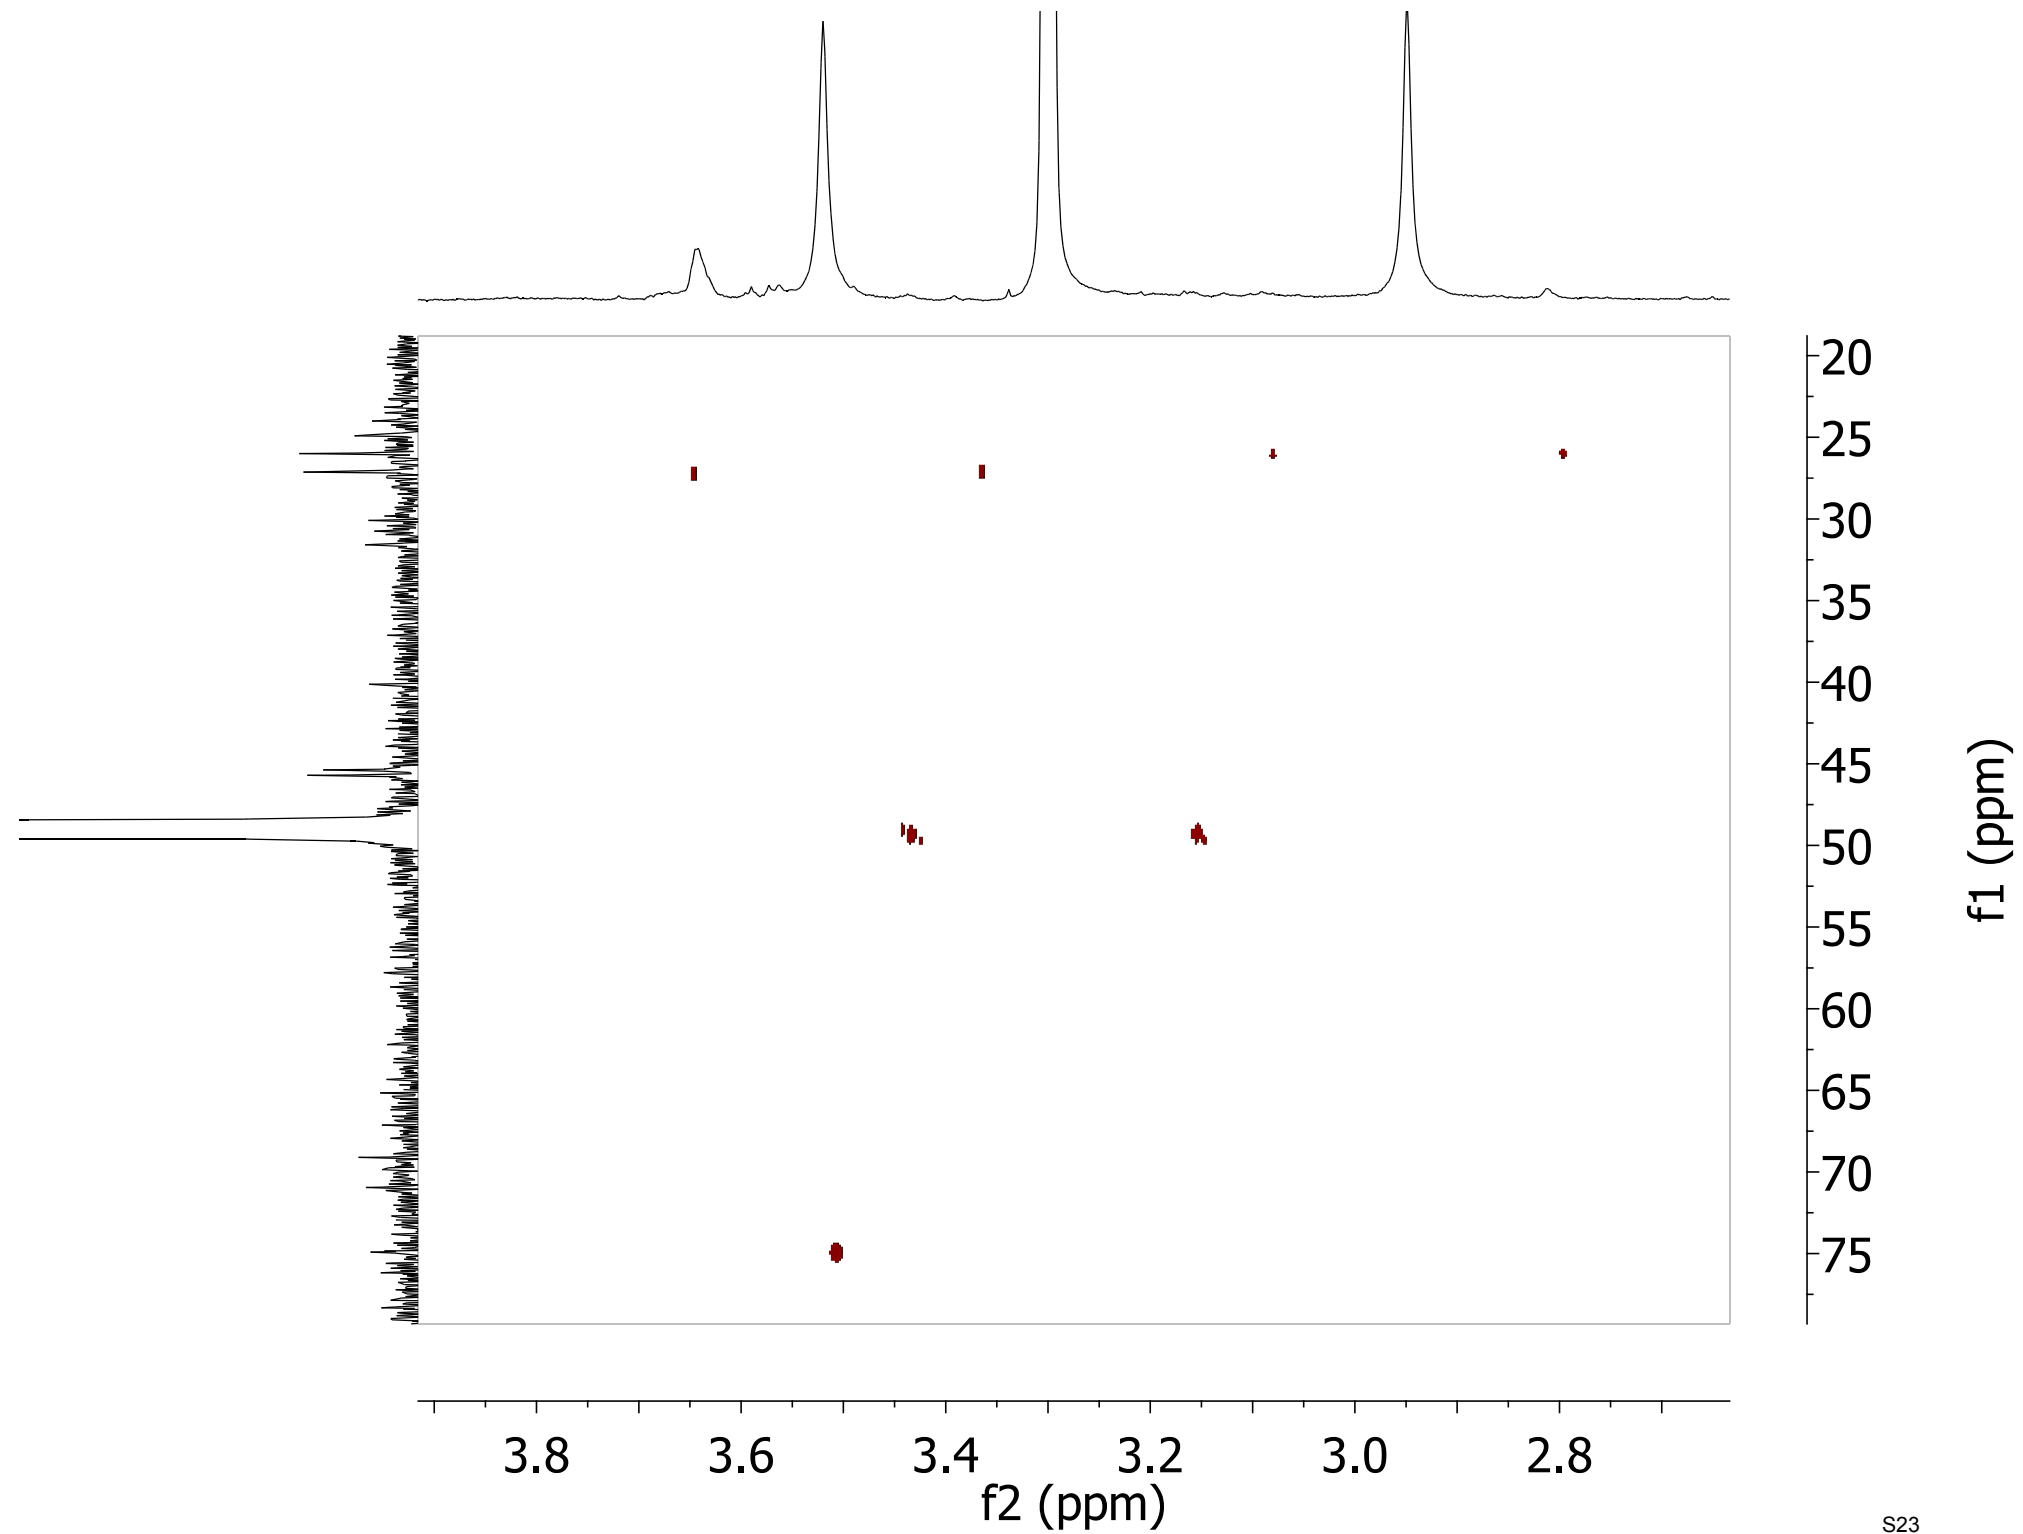

**Figure S14.** DPGSE 1D NOE NMR Spectrum at 500 MHz in MeOH- $d_4$  of Dictazole A (**1**)  
excitation of H-8

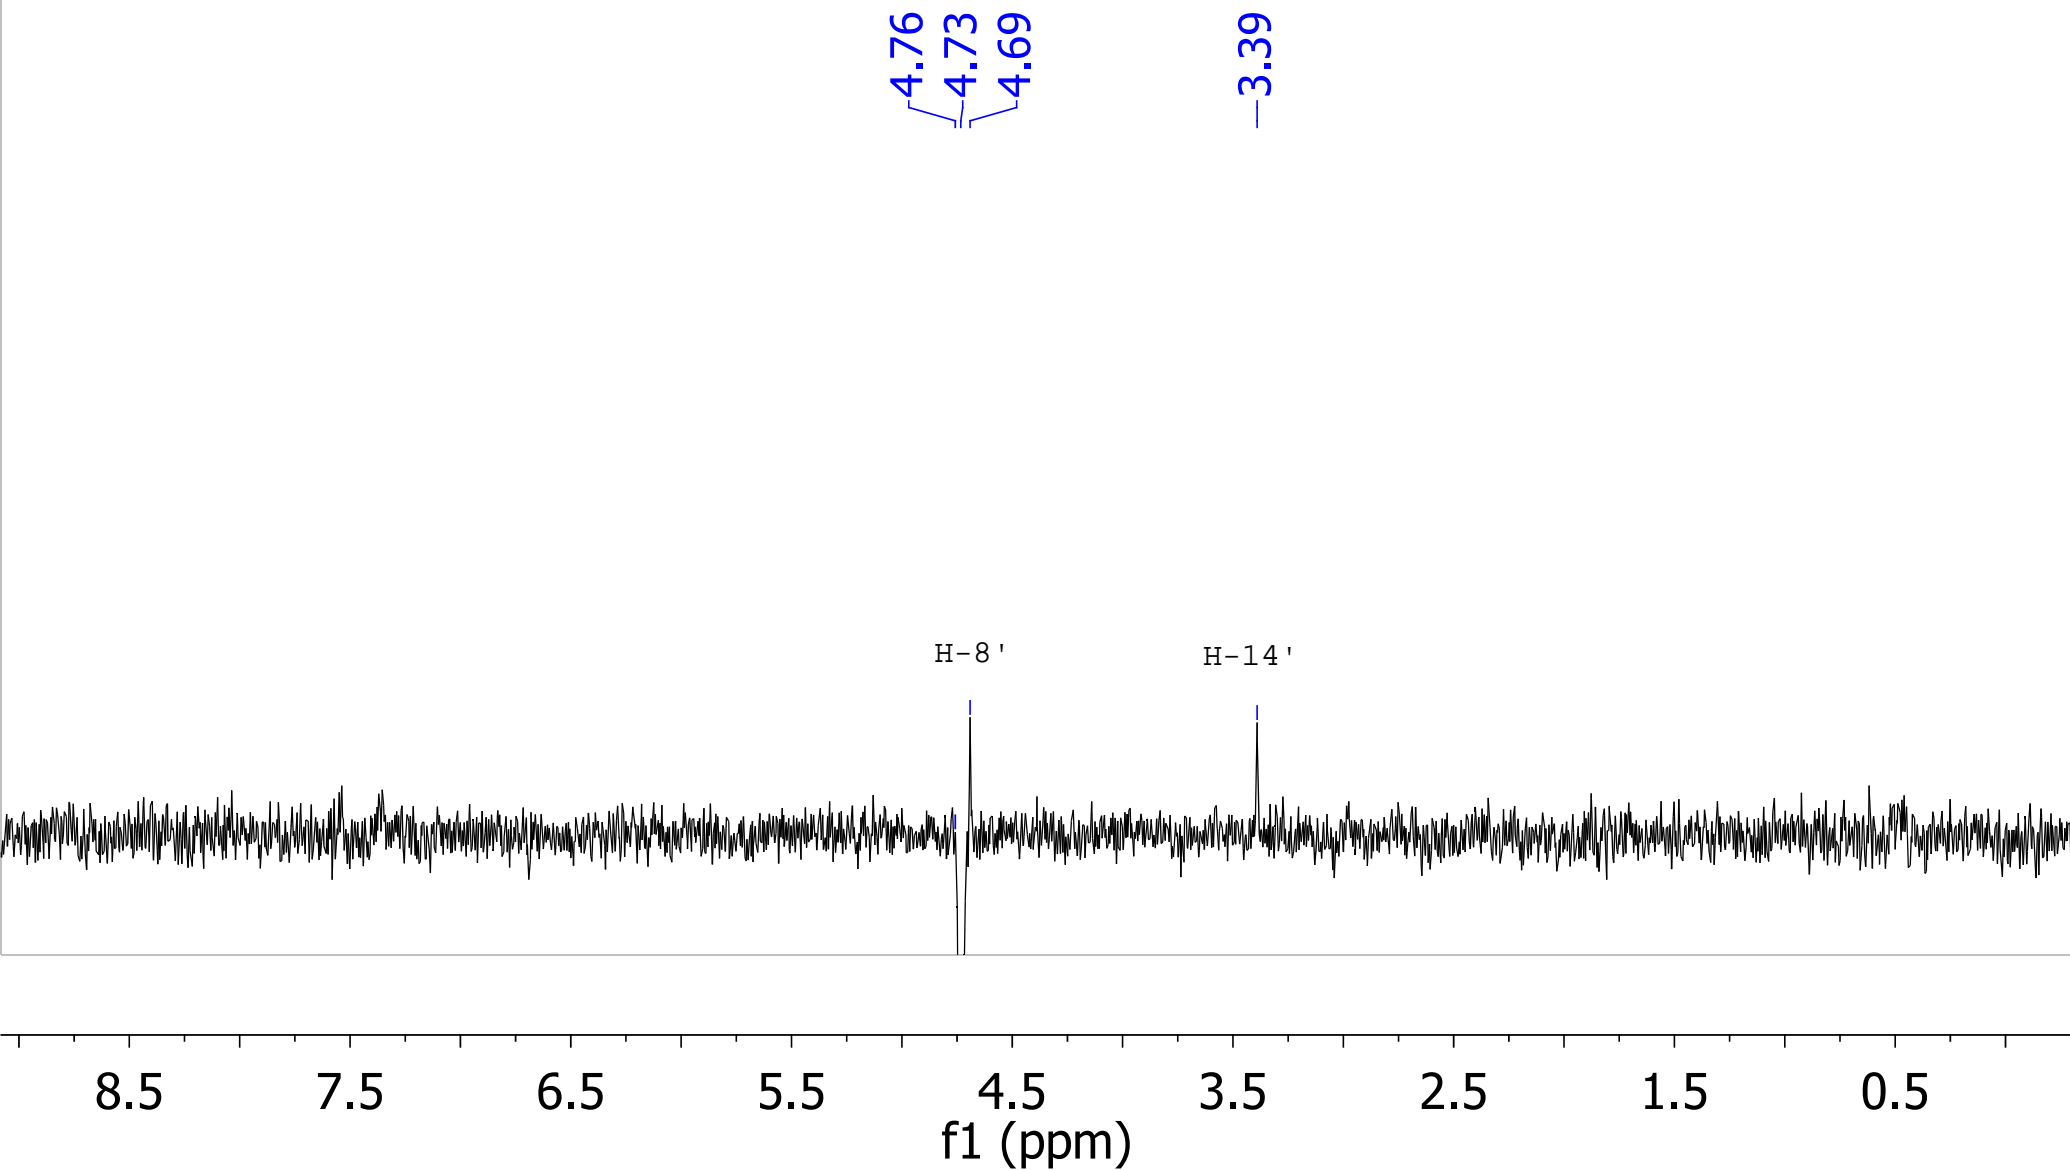

Note: Figure S14 and S15 were recorded along with Figure S1. The N-Me group H-14 has shifted upfield slightly compared to Figure S2.



**Figure S15.** DPGSE 1D NOE NMR Spectrum at 500 MHz in MeOH- $d_4$  of Dictazole A (**1**)  
excitation of H-8'

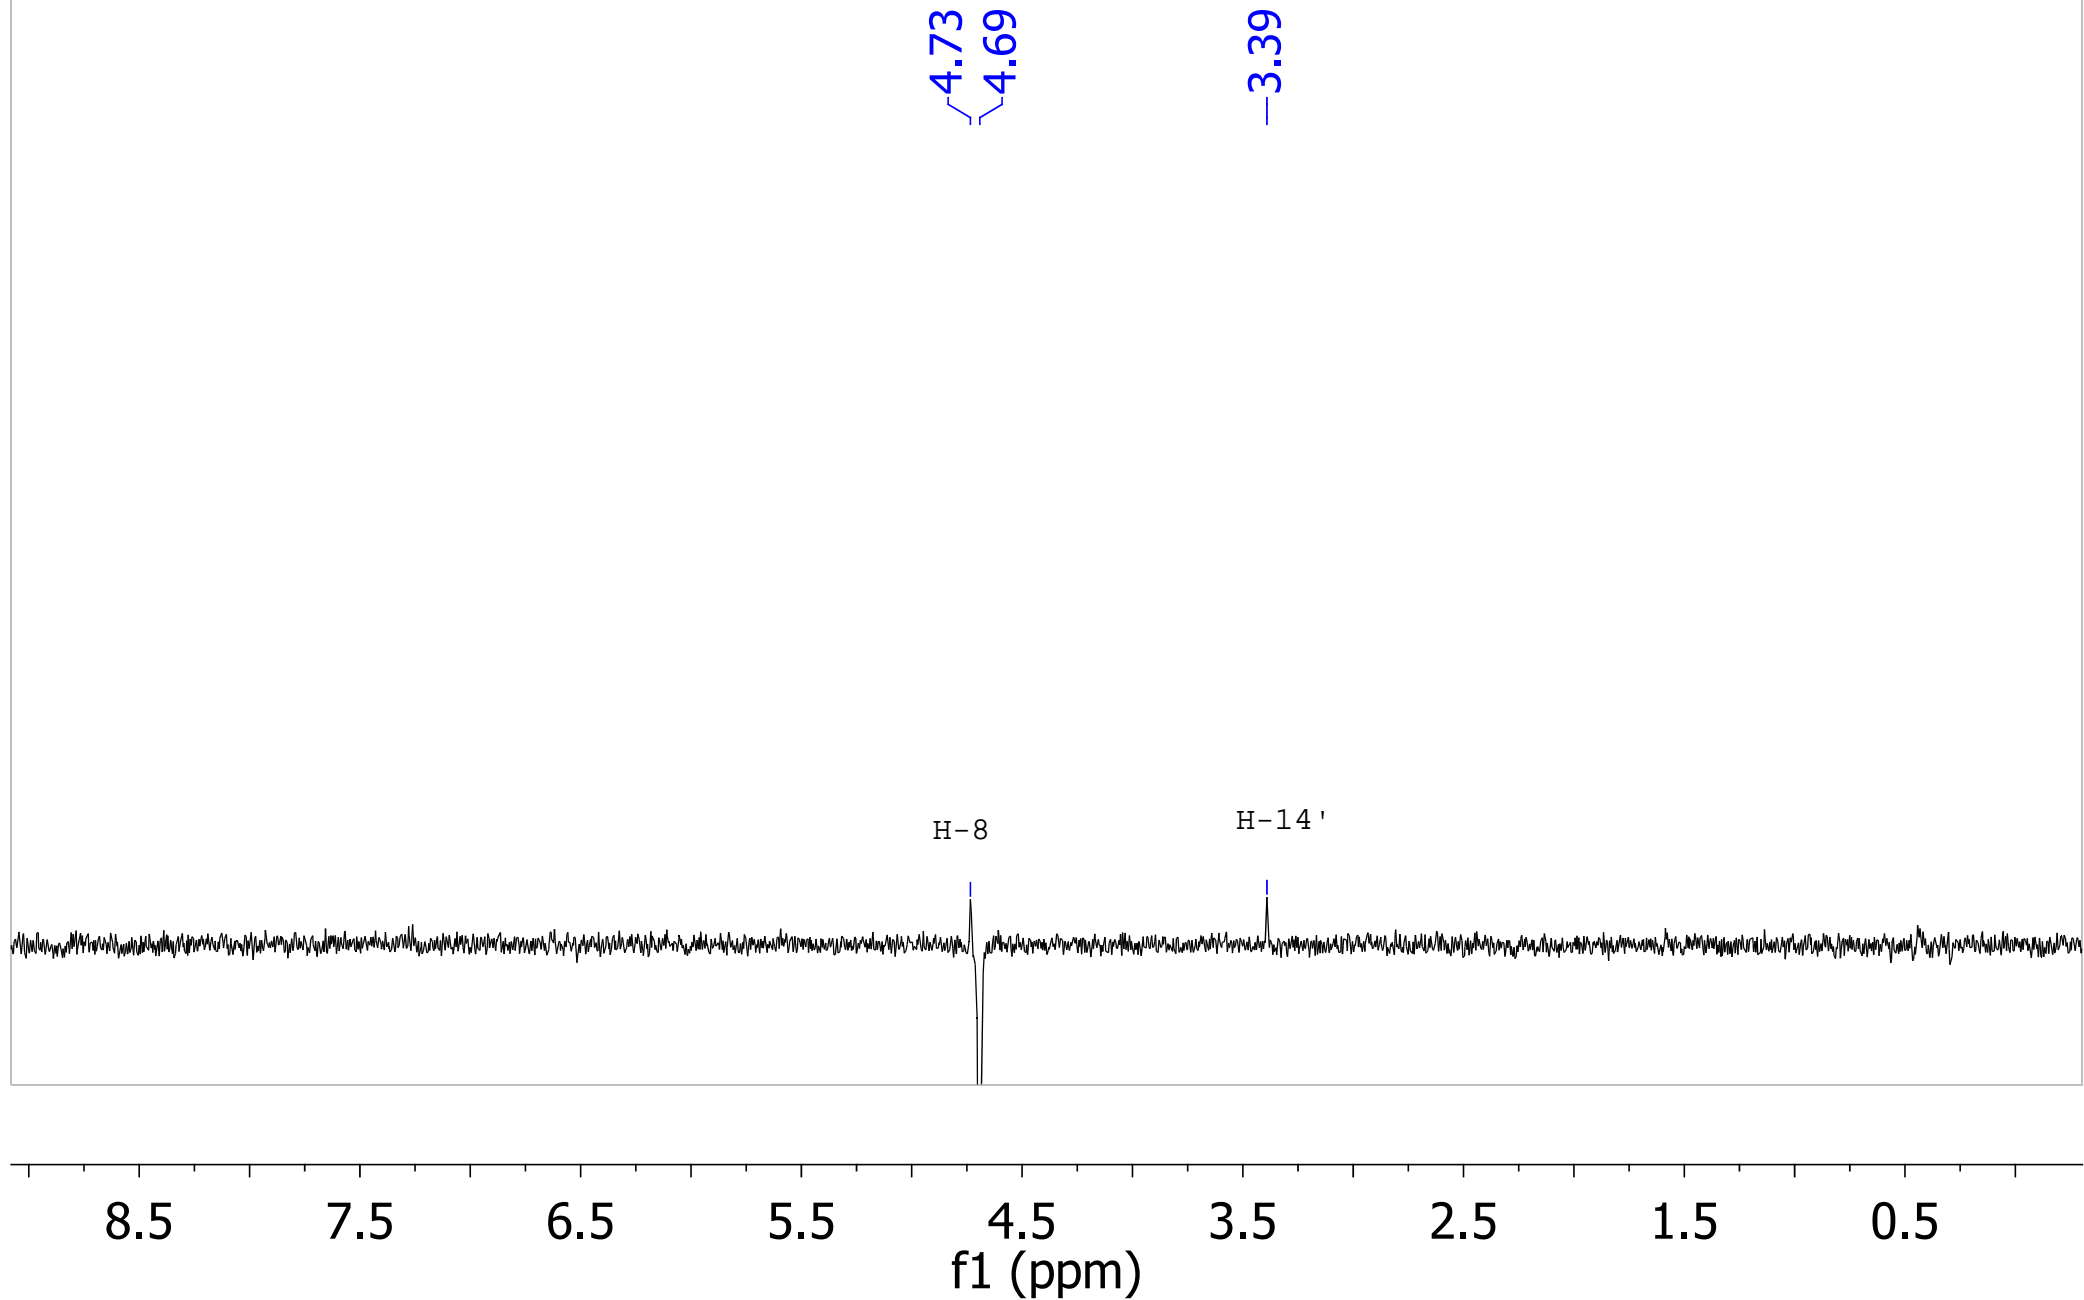

Note: Figure S14 and S15 were recorded along with Figure S1. The N-Me group H-14 has shifted upfield slightly compared to Figure S2.

Figure S16.  $^1\text{H}$  NMR Spectrum at 500 MHz in  $\text{DMSO}-d_6$  of Dictazole A (**1**)

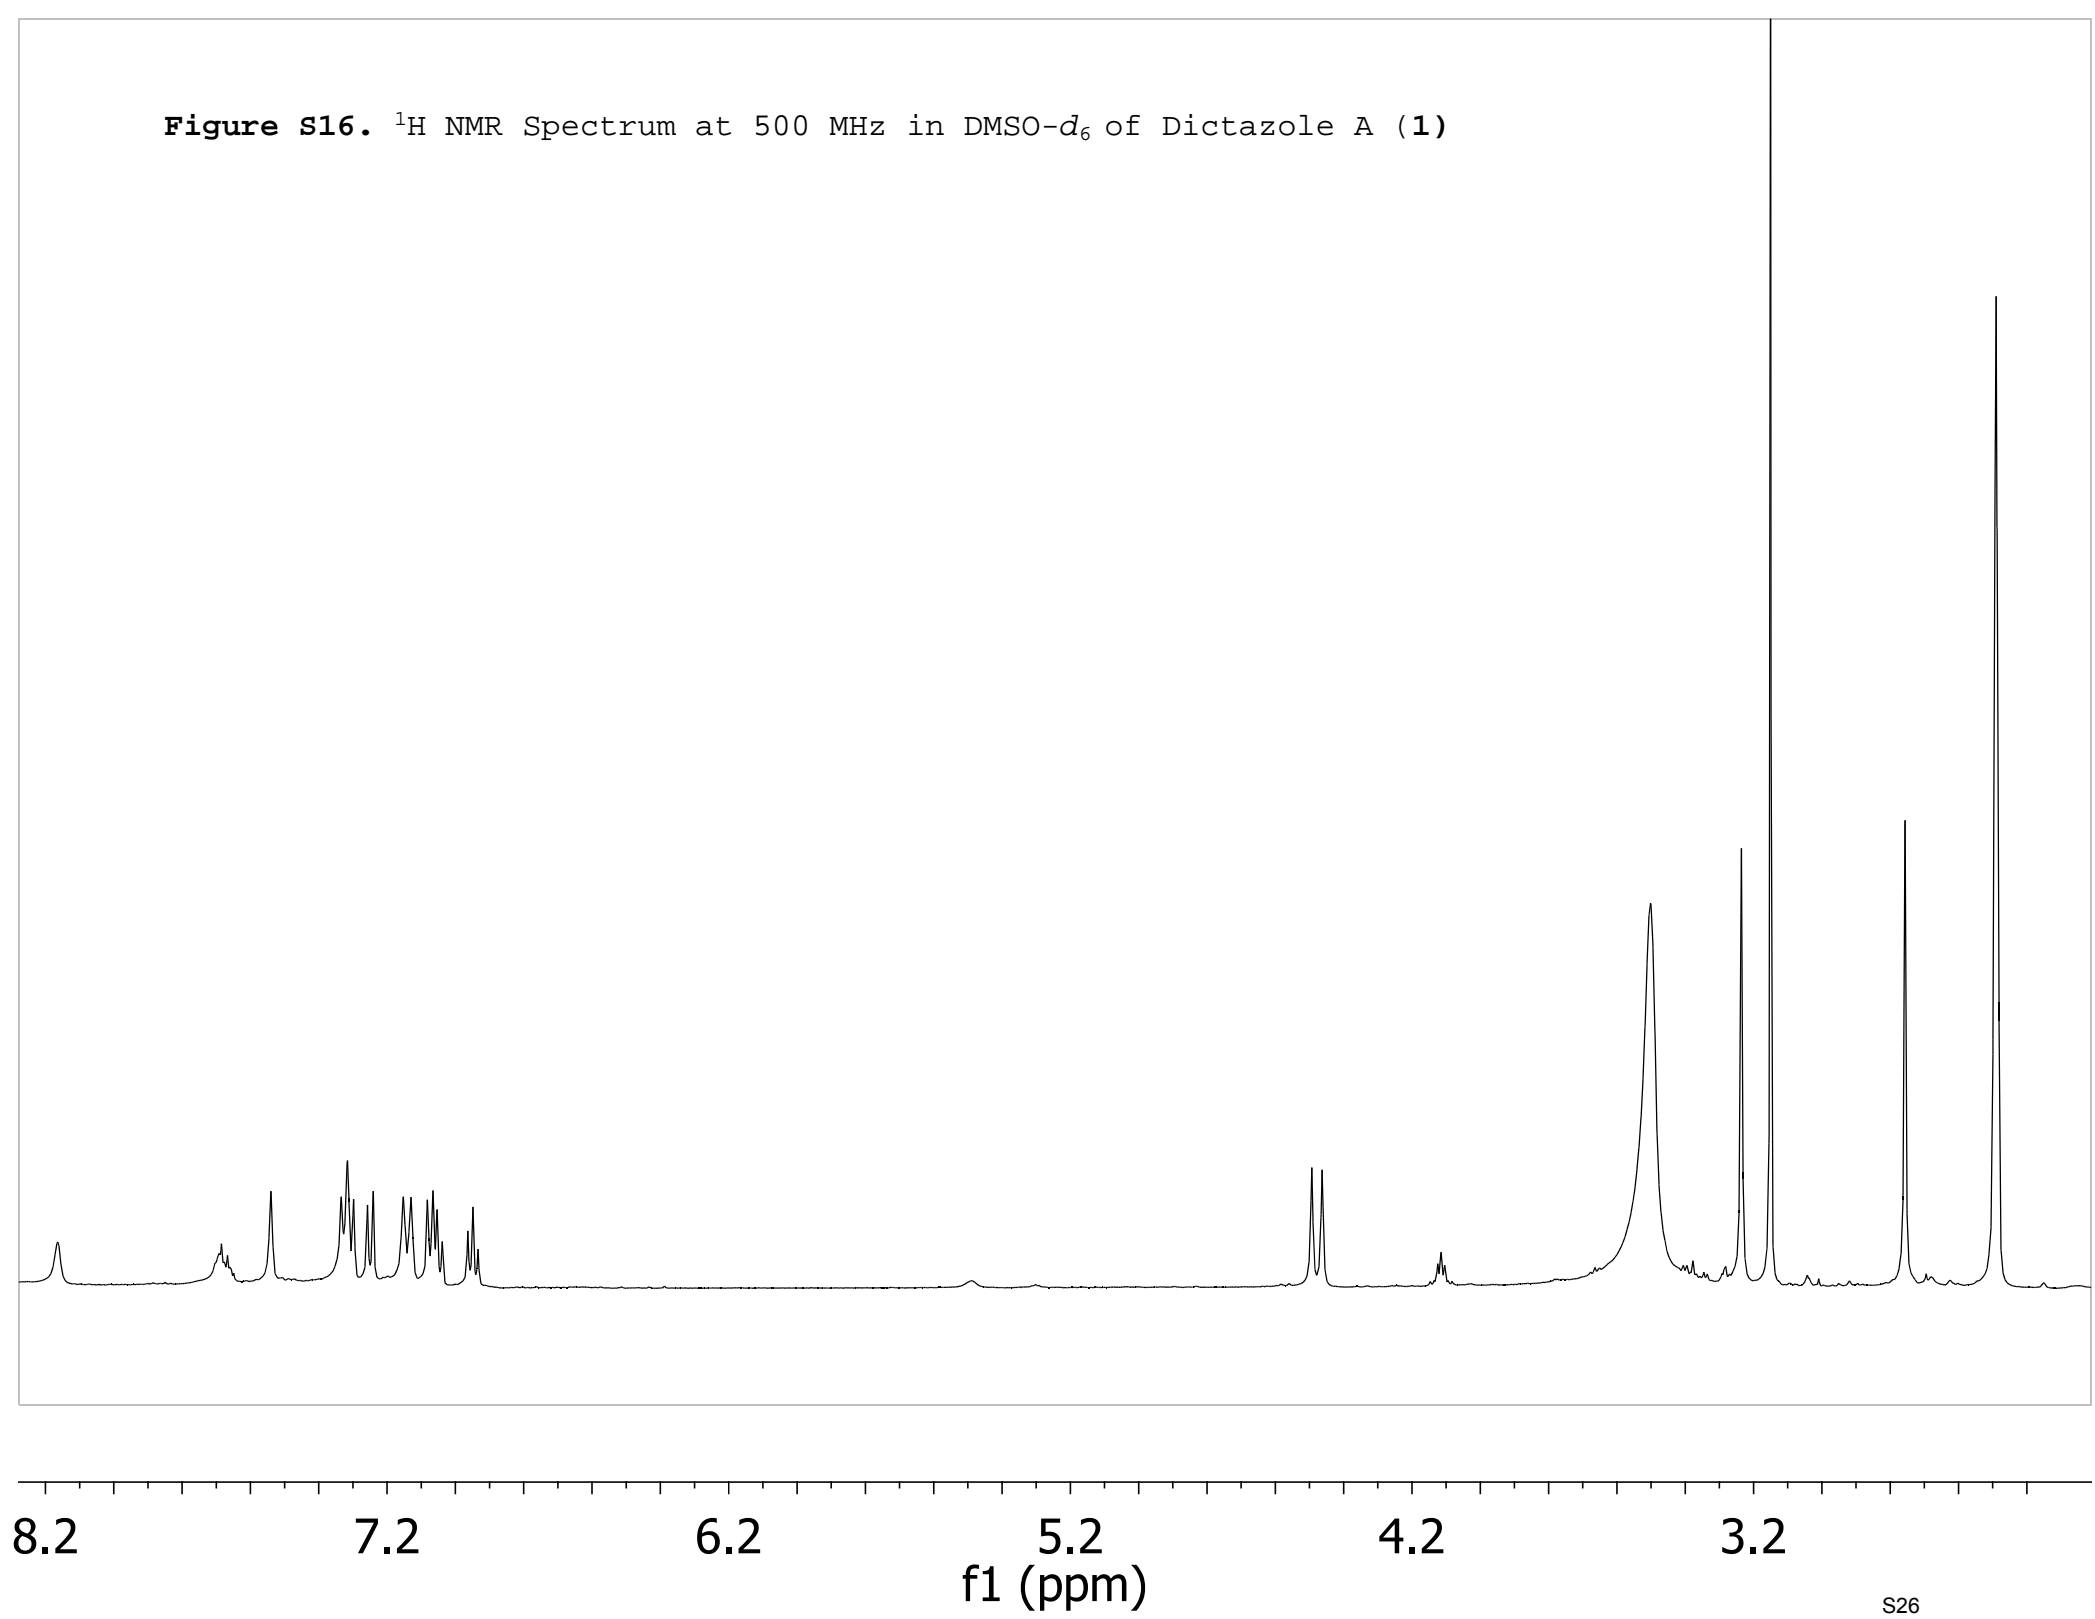

Figure S17.  $^{13}\text{C}$  NMR Spectrum at 125 MHz in  $\text{DMSO-}d_6$  of Dictazole A (1)

Chemical shift values (ppm) for the peaks in the spectrum:

- 188.50
- 172.58
- 170.88
- 153.53
- 135.29
- 128.81
- 126.42
- 123.61
- 121.55
- 119.13
- 114.32
- 111.70
- 106.51
- 105.96
- 72.72
- 69.88
- 67.57
- 67.20
- 48.73
- 40.01
- 39.50
- 39.00
- 25.76
- 25.07

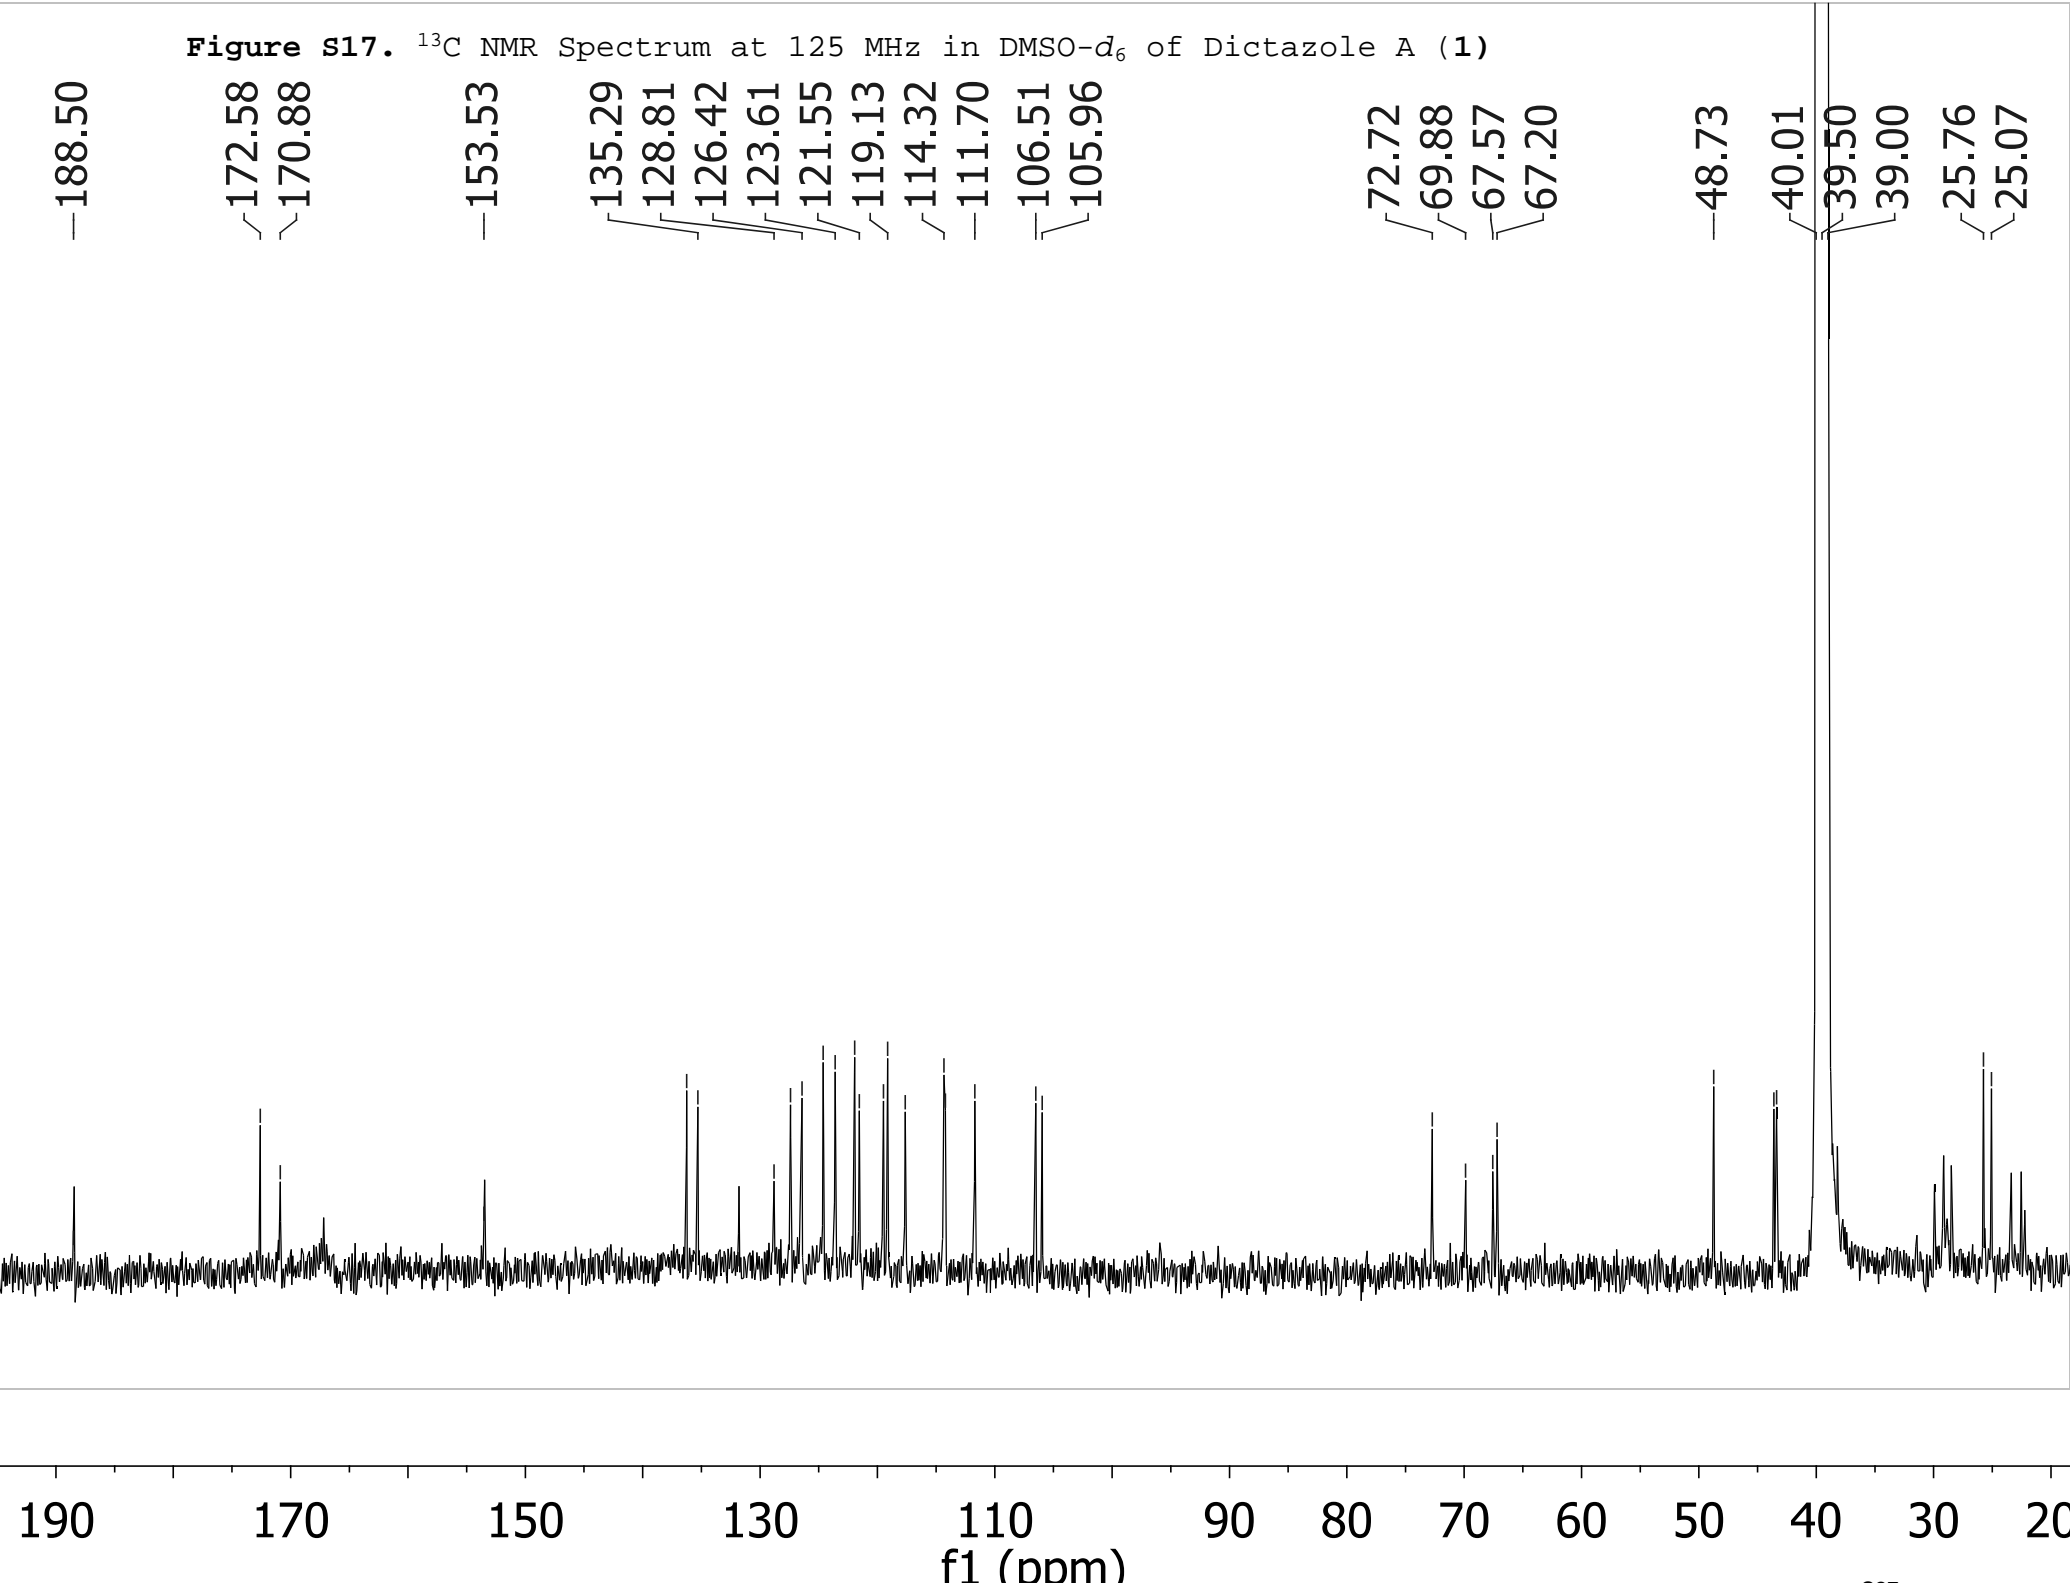

Figure S18. meHSQC NMR Spectrum at 500 MHz in DMSO- $d_6$  of Dicatzoze A (1)

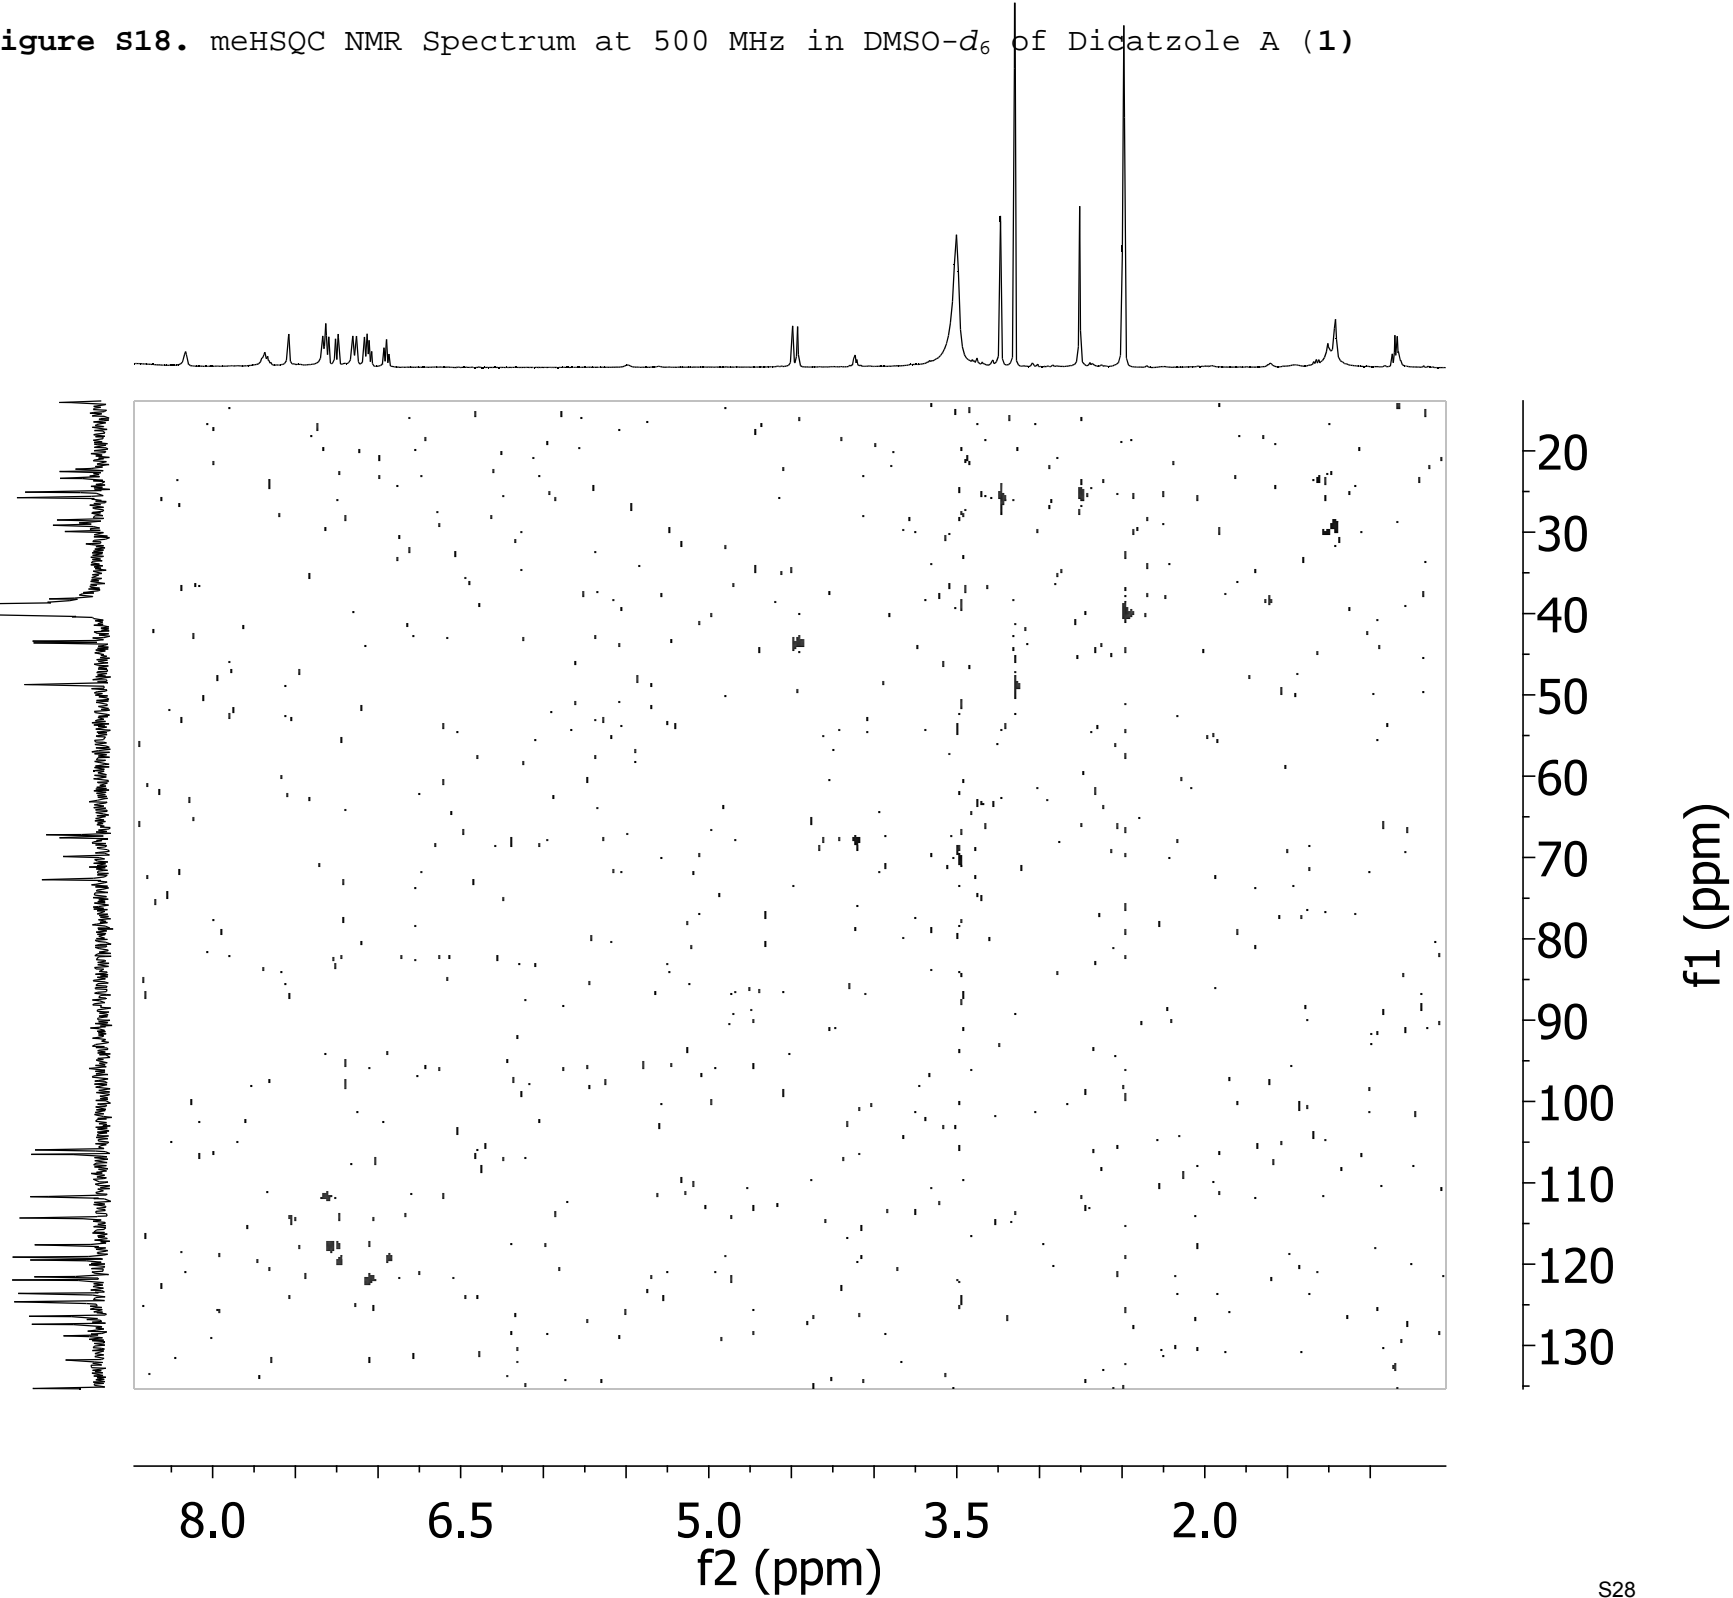

Figure S19. Expansion of meHSQC NMR Spectrum at 500 MHz in DMSO- $d_6$  of Dictazole A (1)

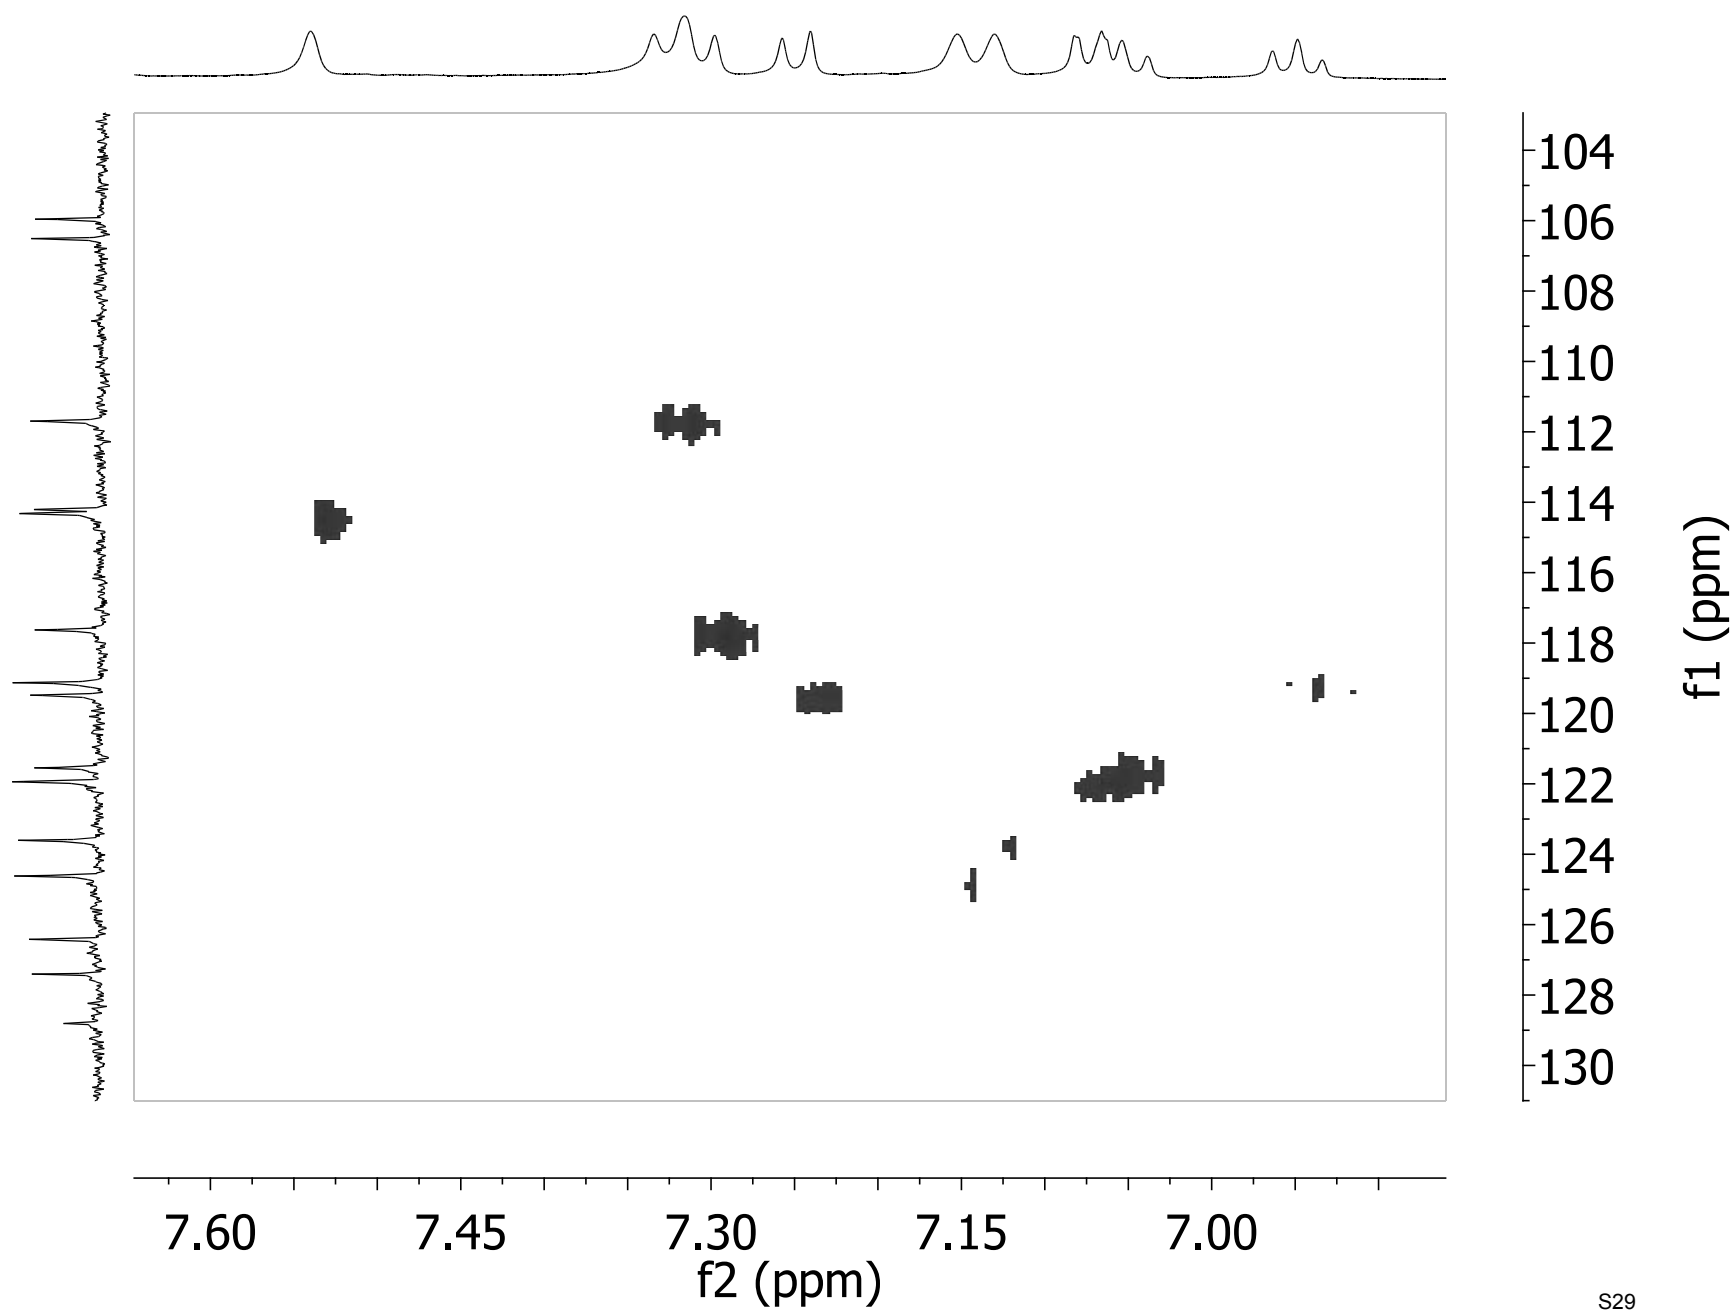

Figure S20. Expansion of meHSQC NMR Spectrum at 500 MHz in DMSO- $d_6$  of Dictazole A (1)

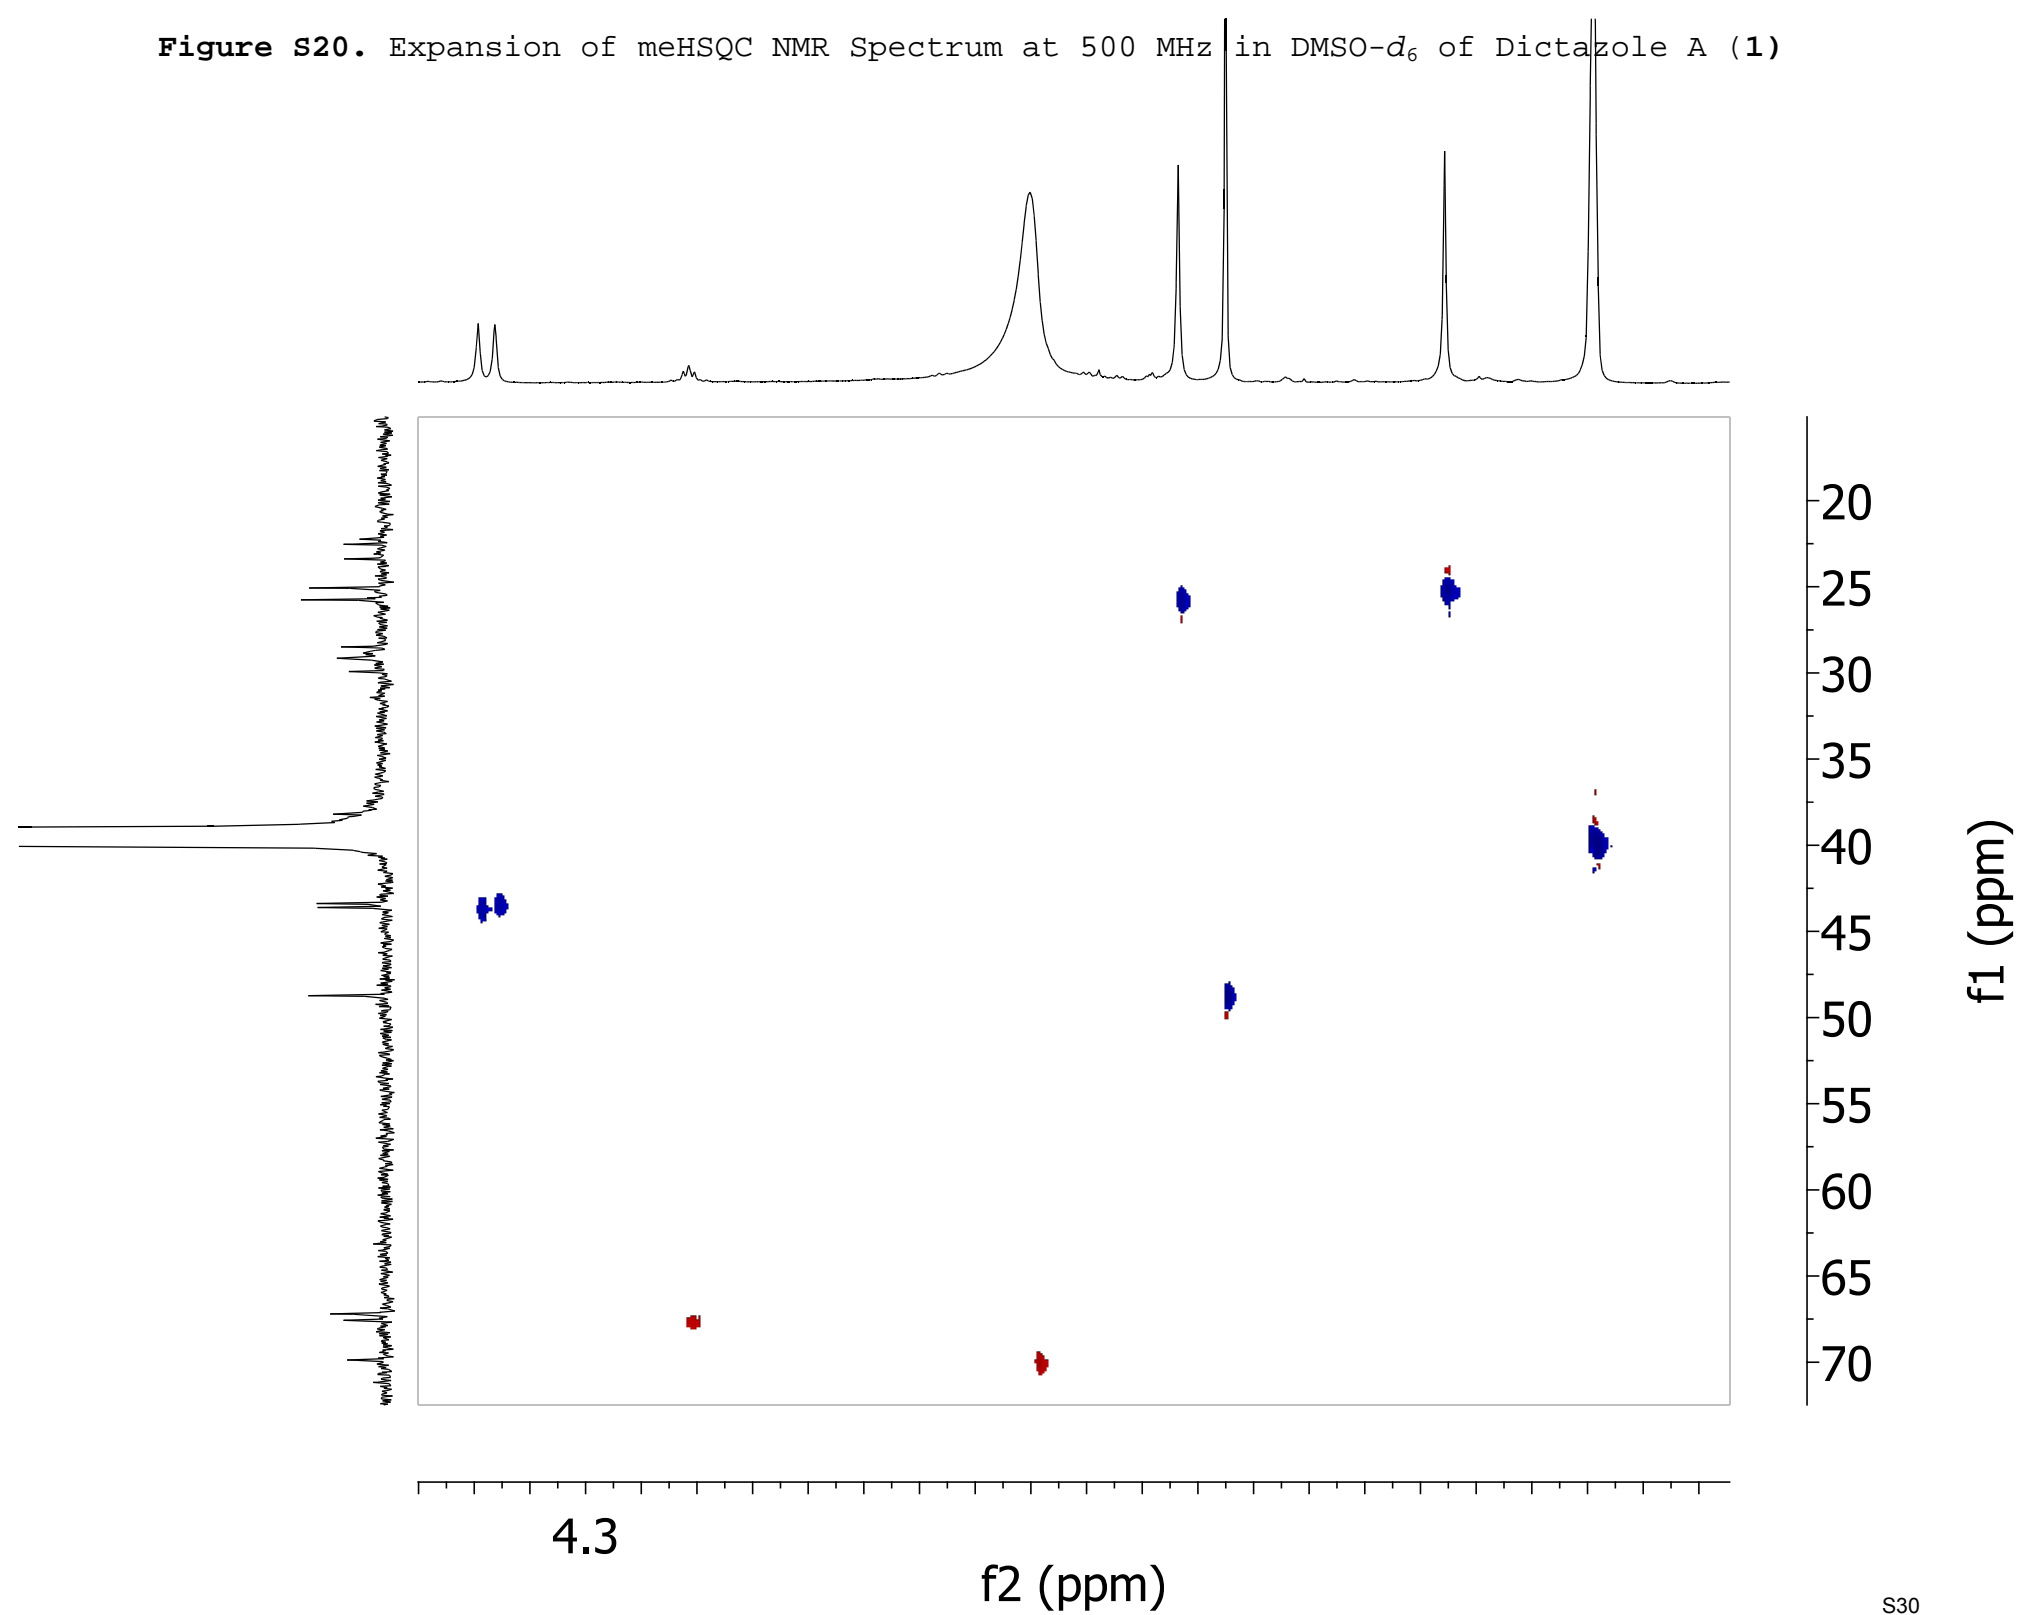

**Figure S21.** Expansion of meHSQC NMR Spectrum at 500 MHz in DMSO- $d_6$  of Dictazole A (**1**)

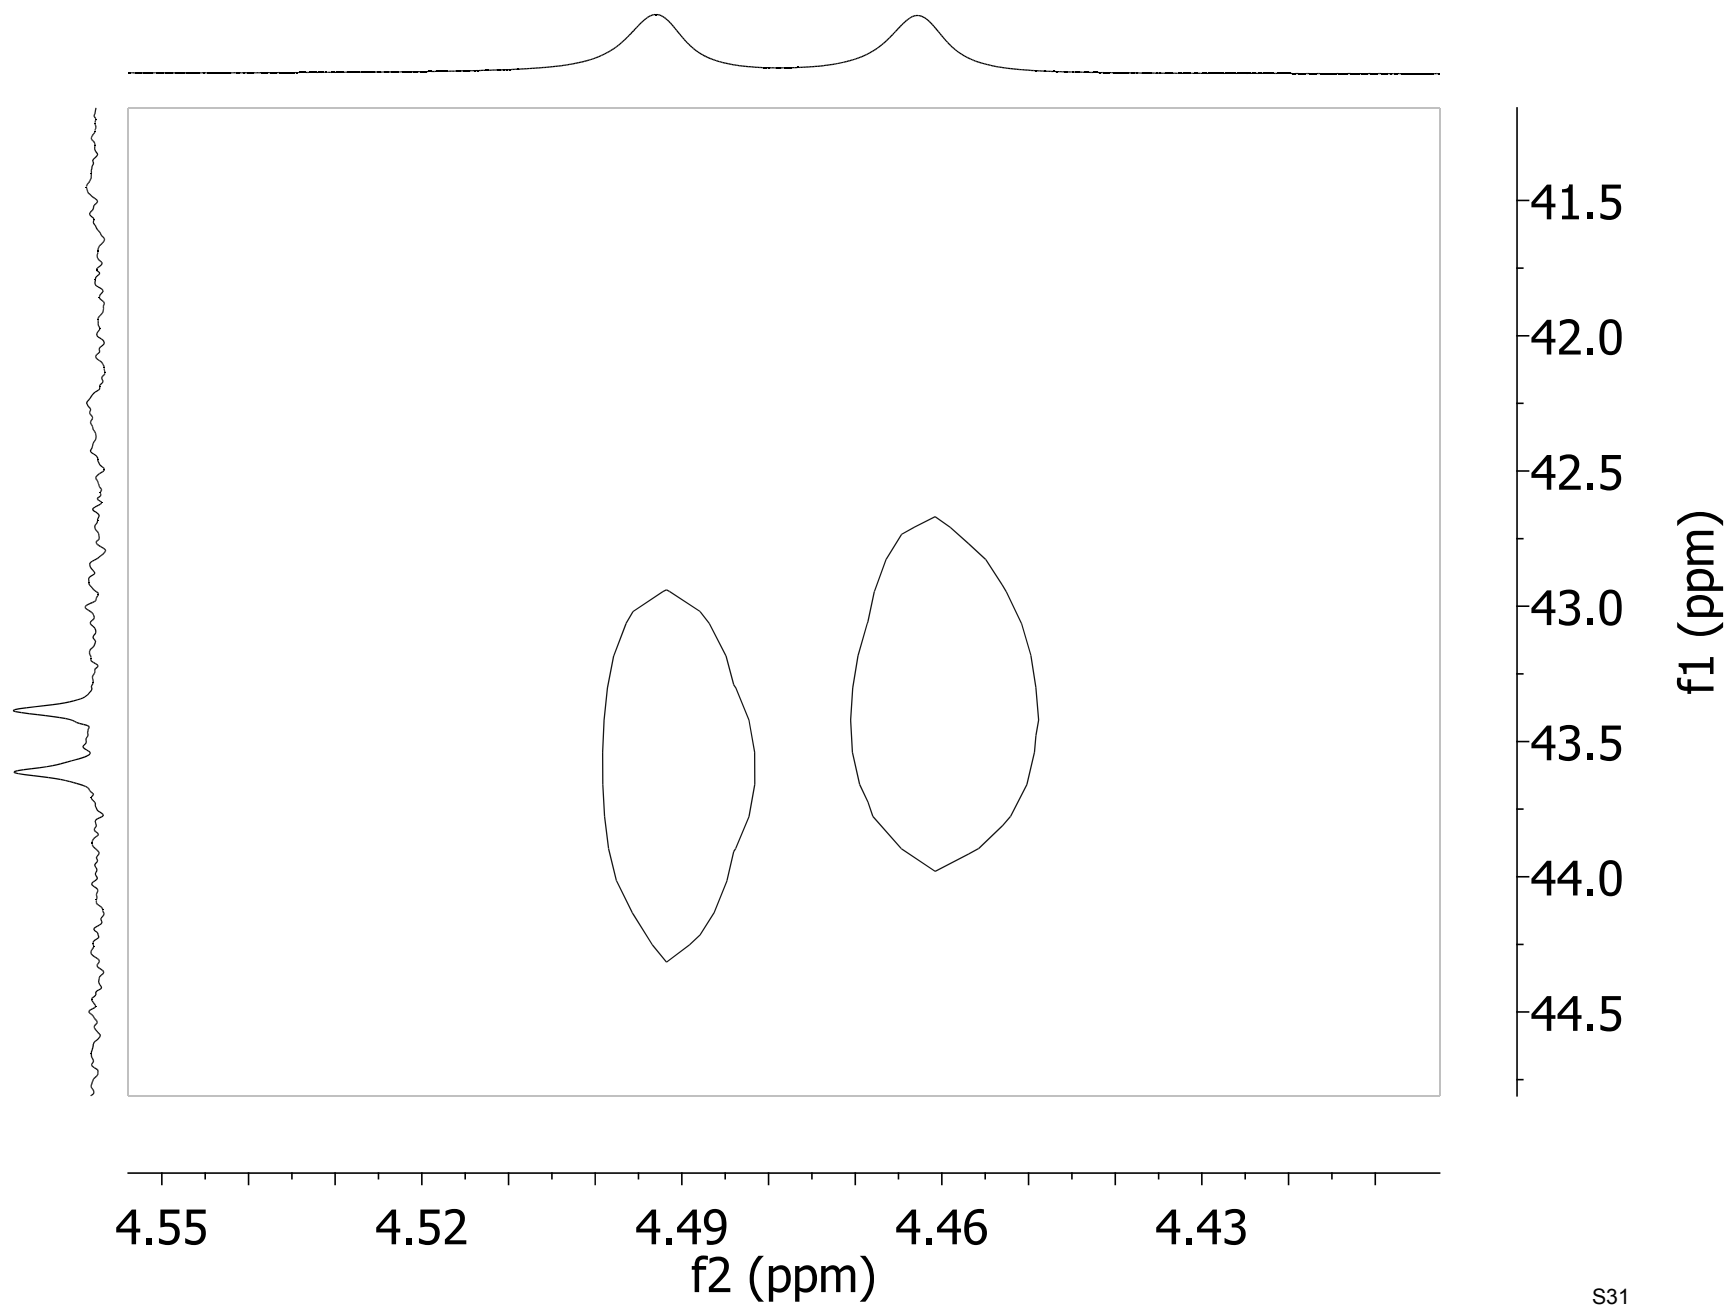

Figure S22. HMBC NMR Spectrum at 500 MHz in DMSO- $d_6$  of Dictazole A (1)

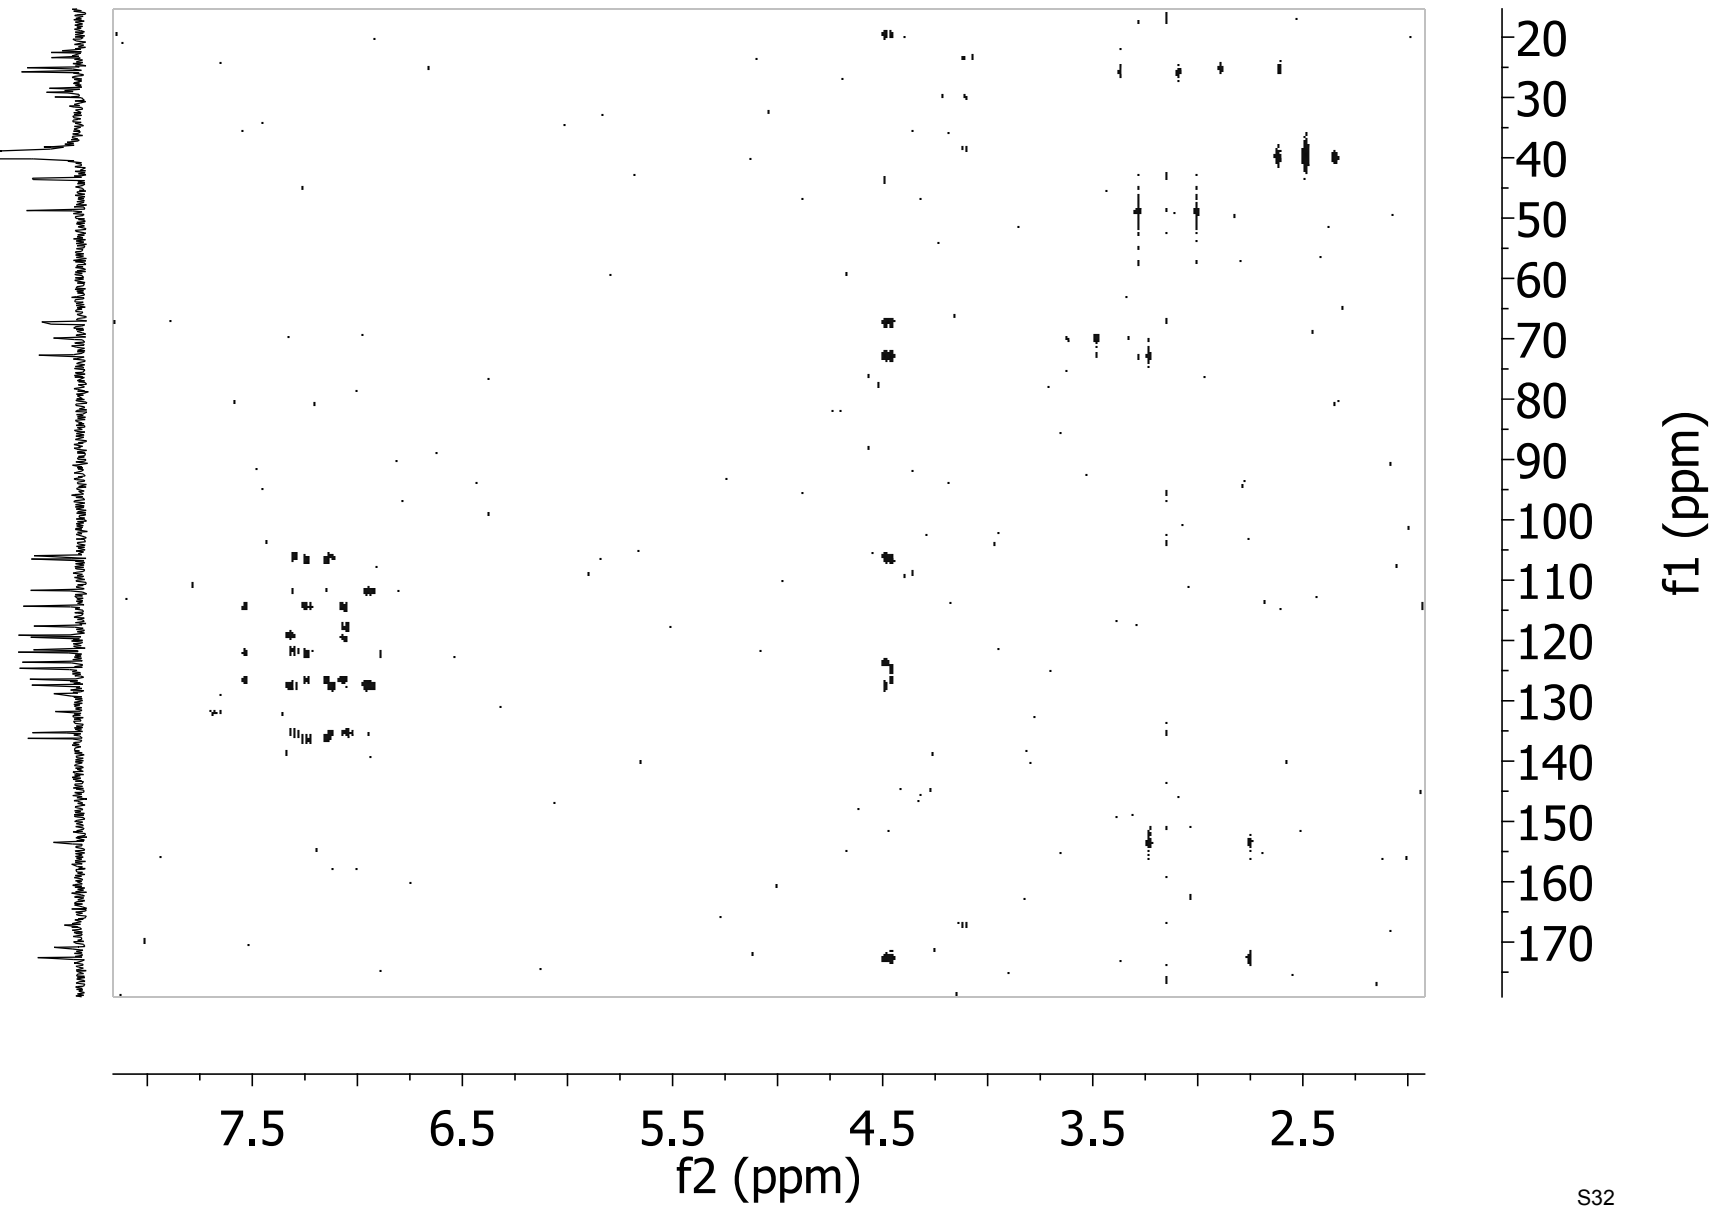



Figure S23. Expansion of HMBC NMR Spectrum at 500 MHz in DMSO- $d_6$  of Dictazole A (1)

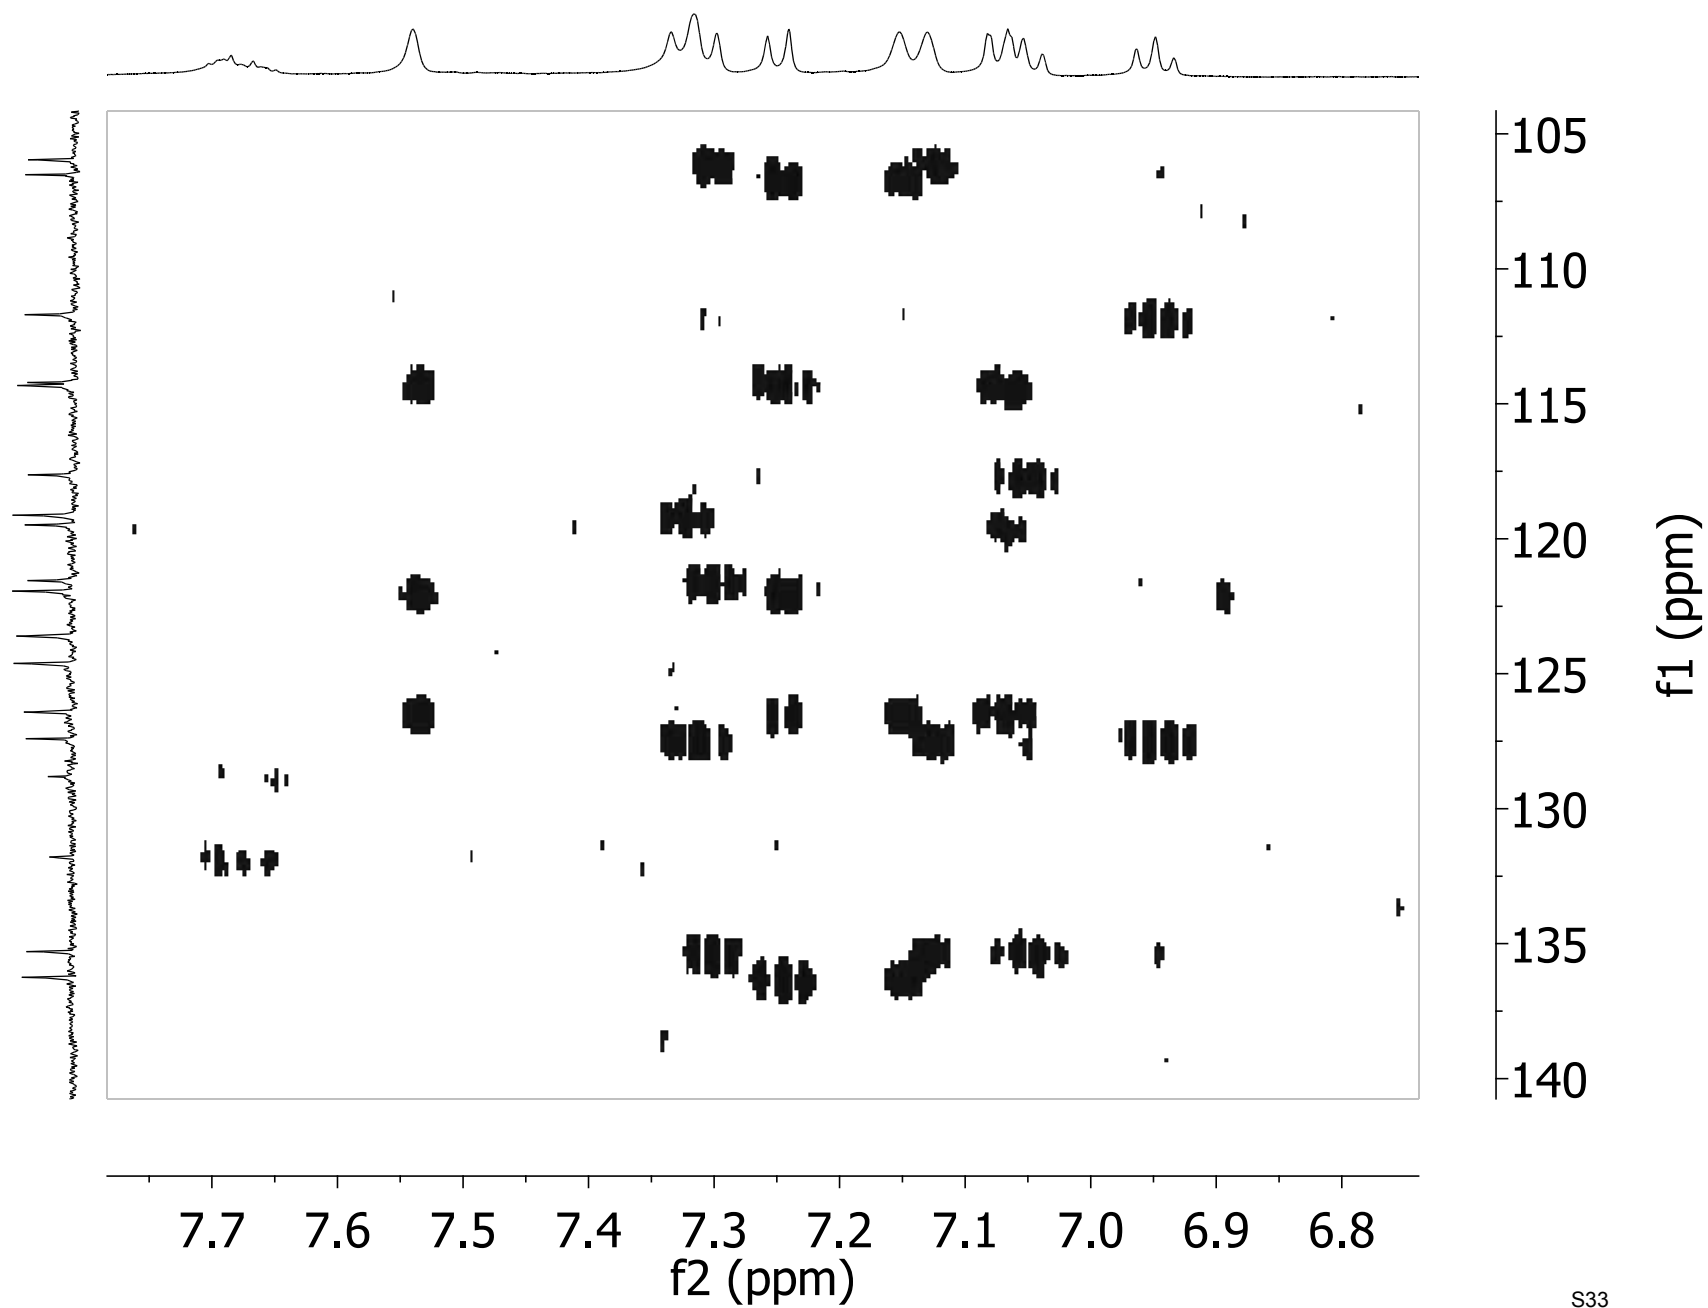

Figure S24. Expansion of HMBC NMR Spectrum at 500 MHz in DMSO- $d_6$  of Dictazole A (1)

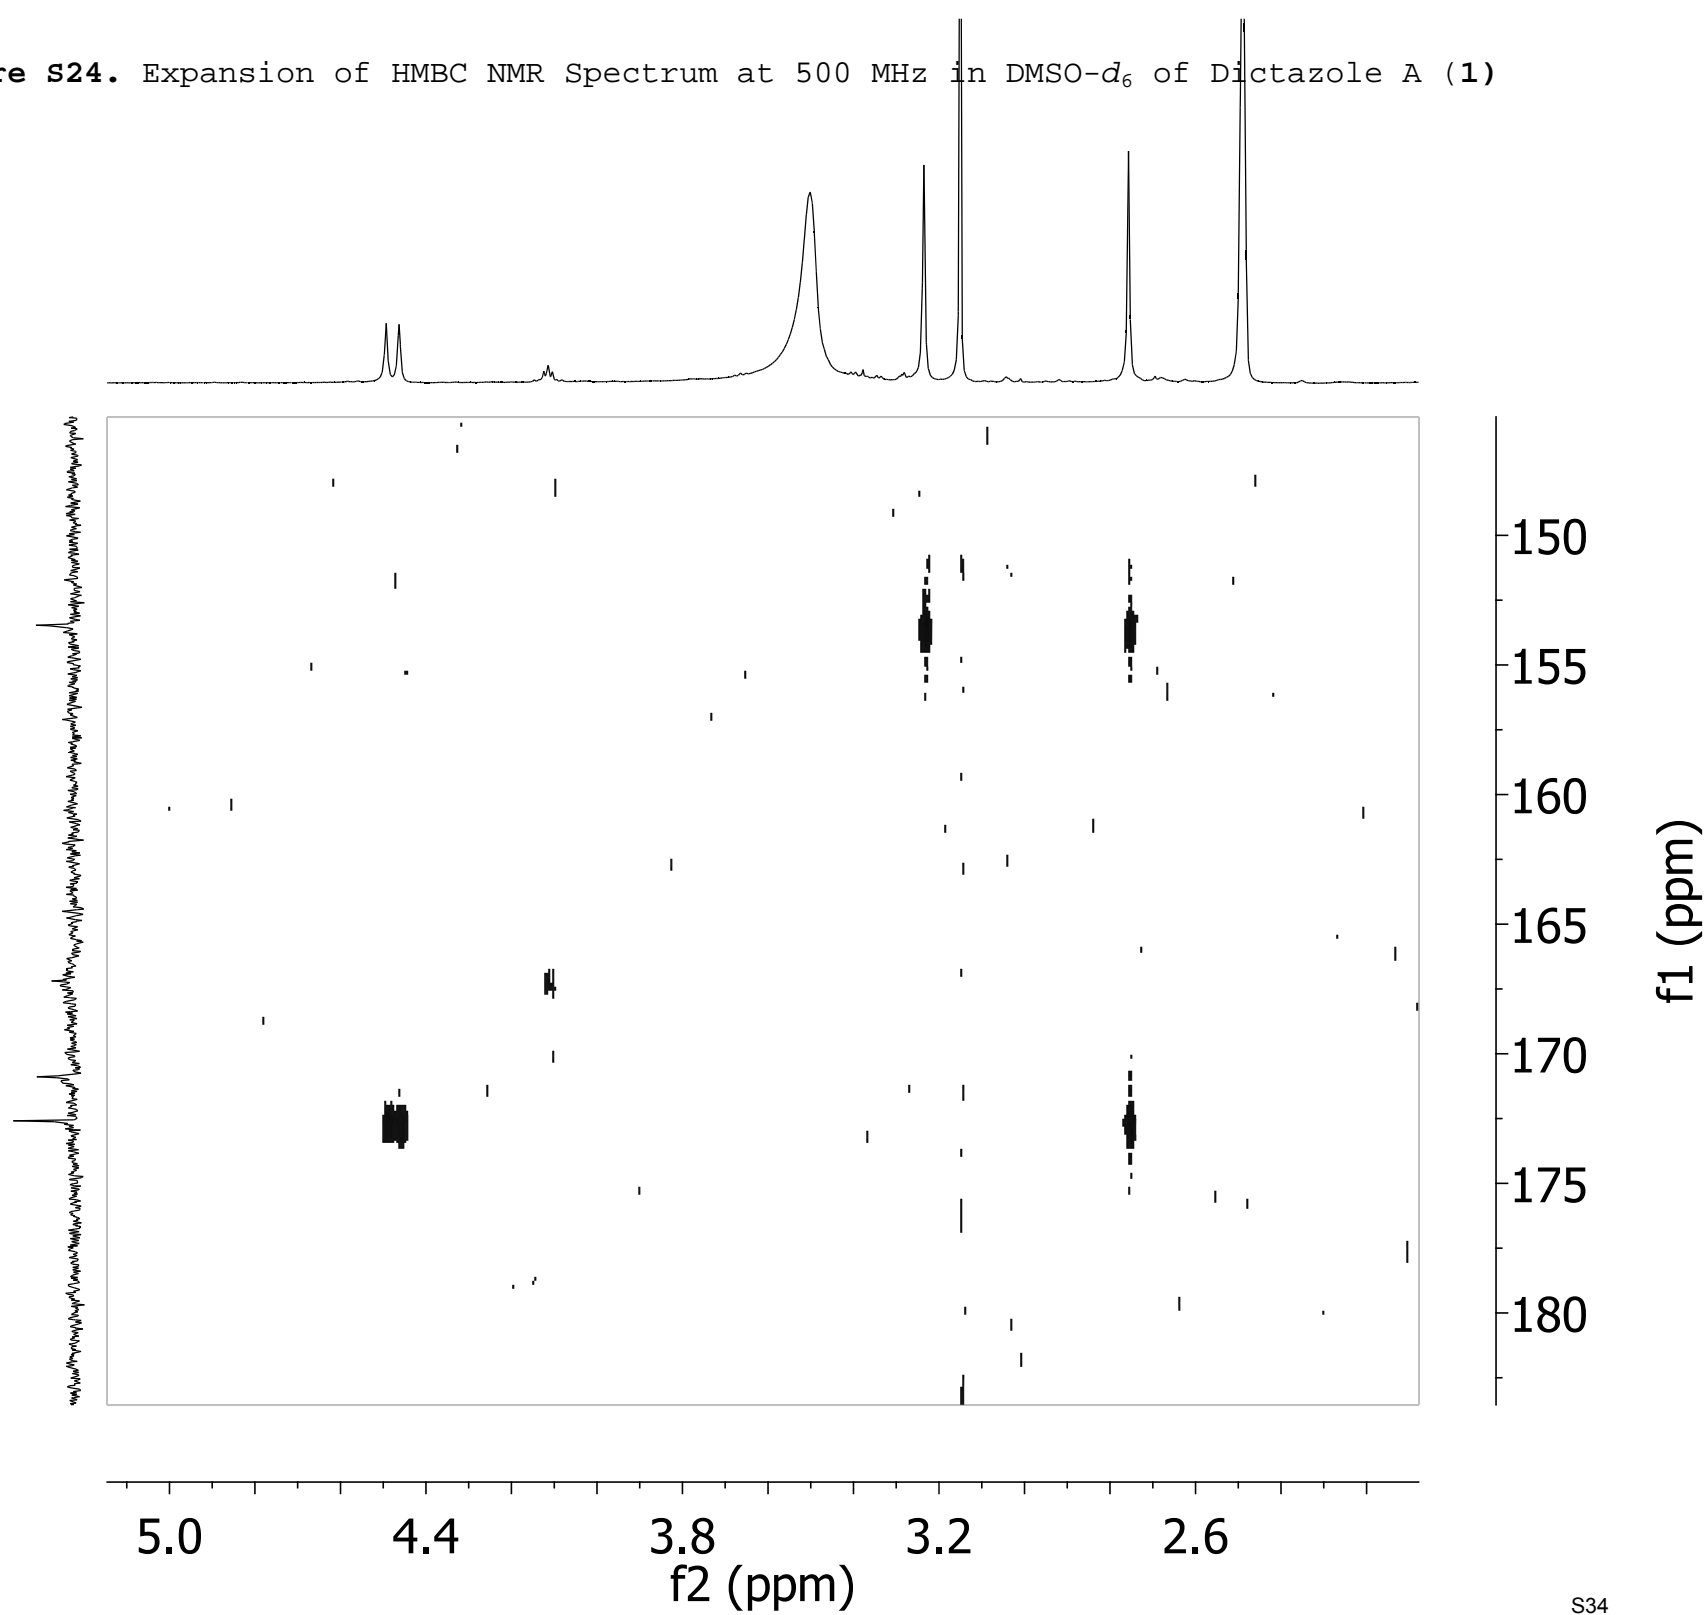

Figure S25. Expansion of HMBC NMR Spectrum at 500 MHz in DMSO- $d_6$  of Dictazole A (1)

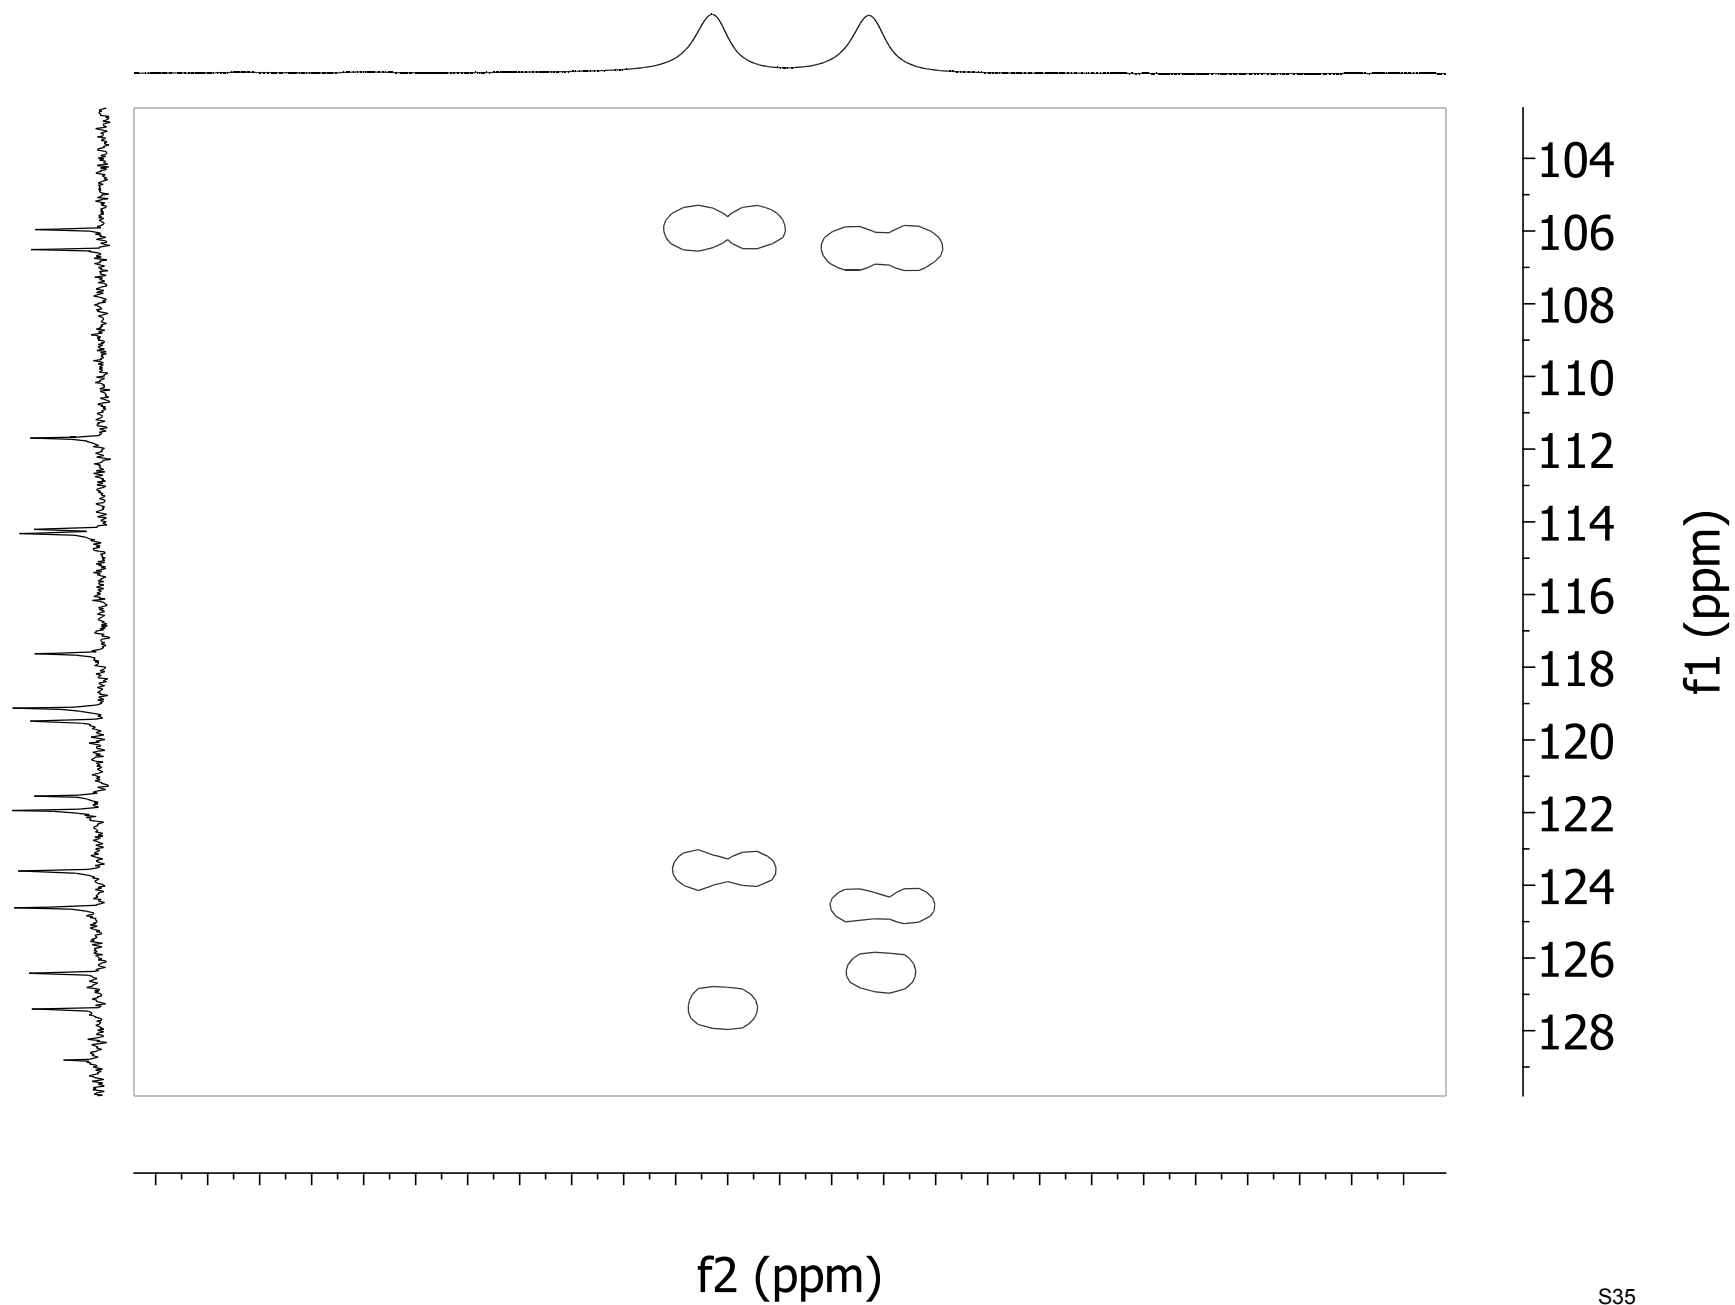

Figure S26. Expansion of HMBC NMR Spectrum at 500 MHz in DMSO- $d_6$  of Dictazole A (1)

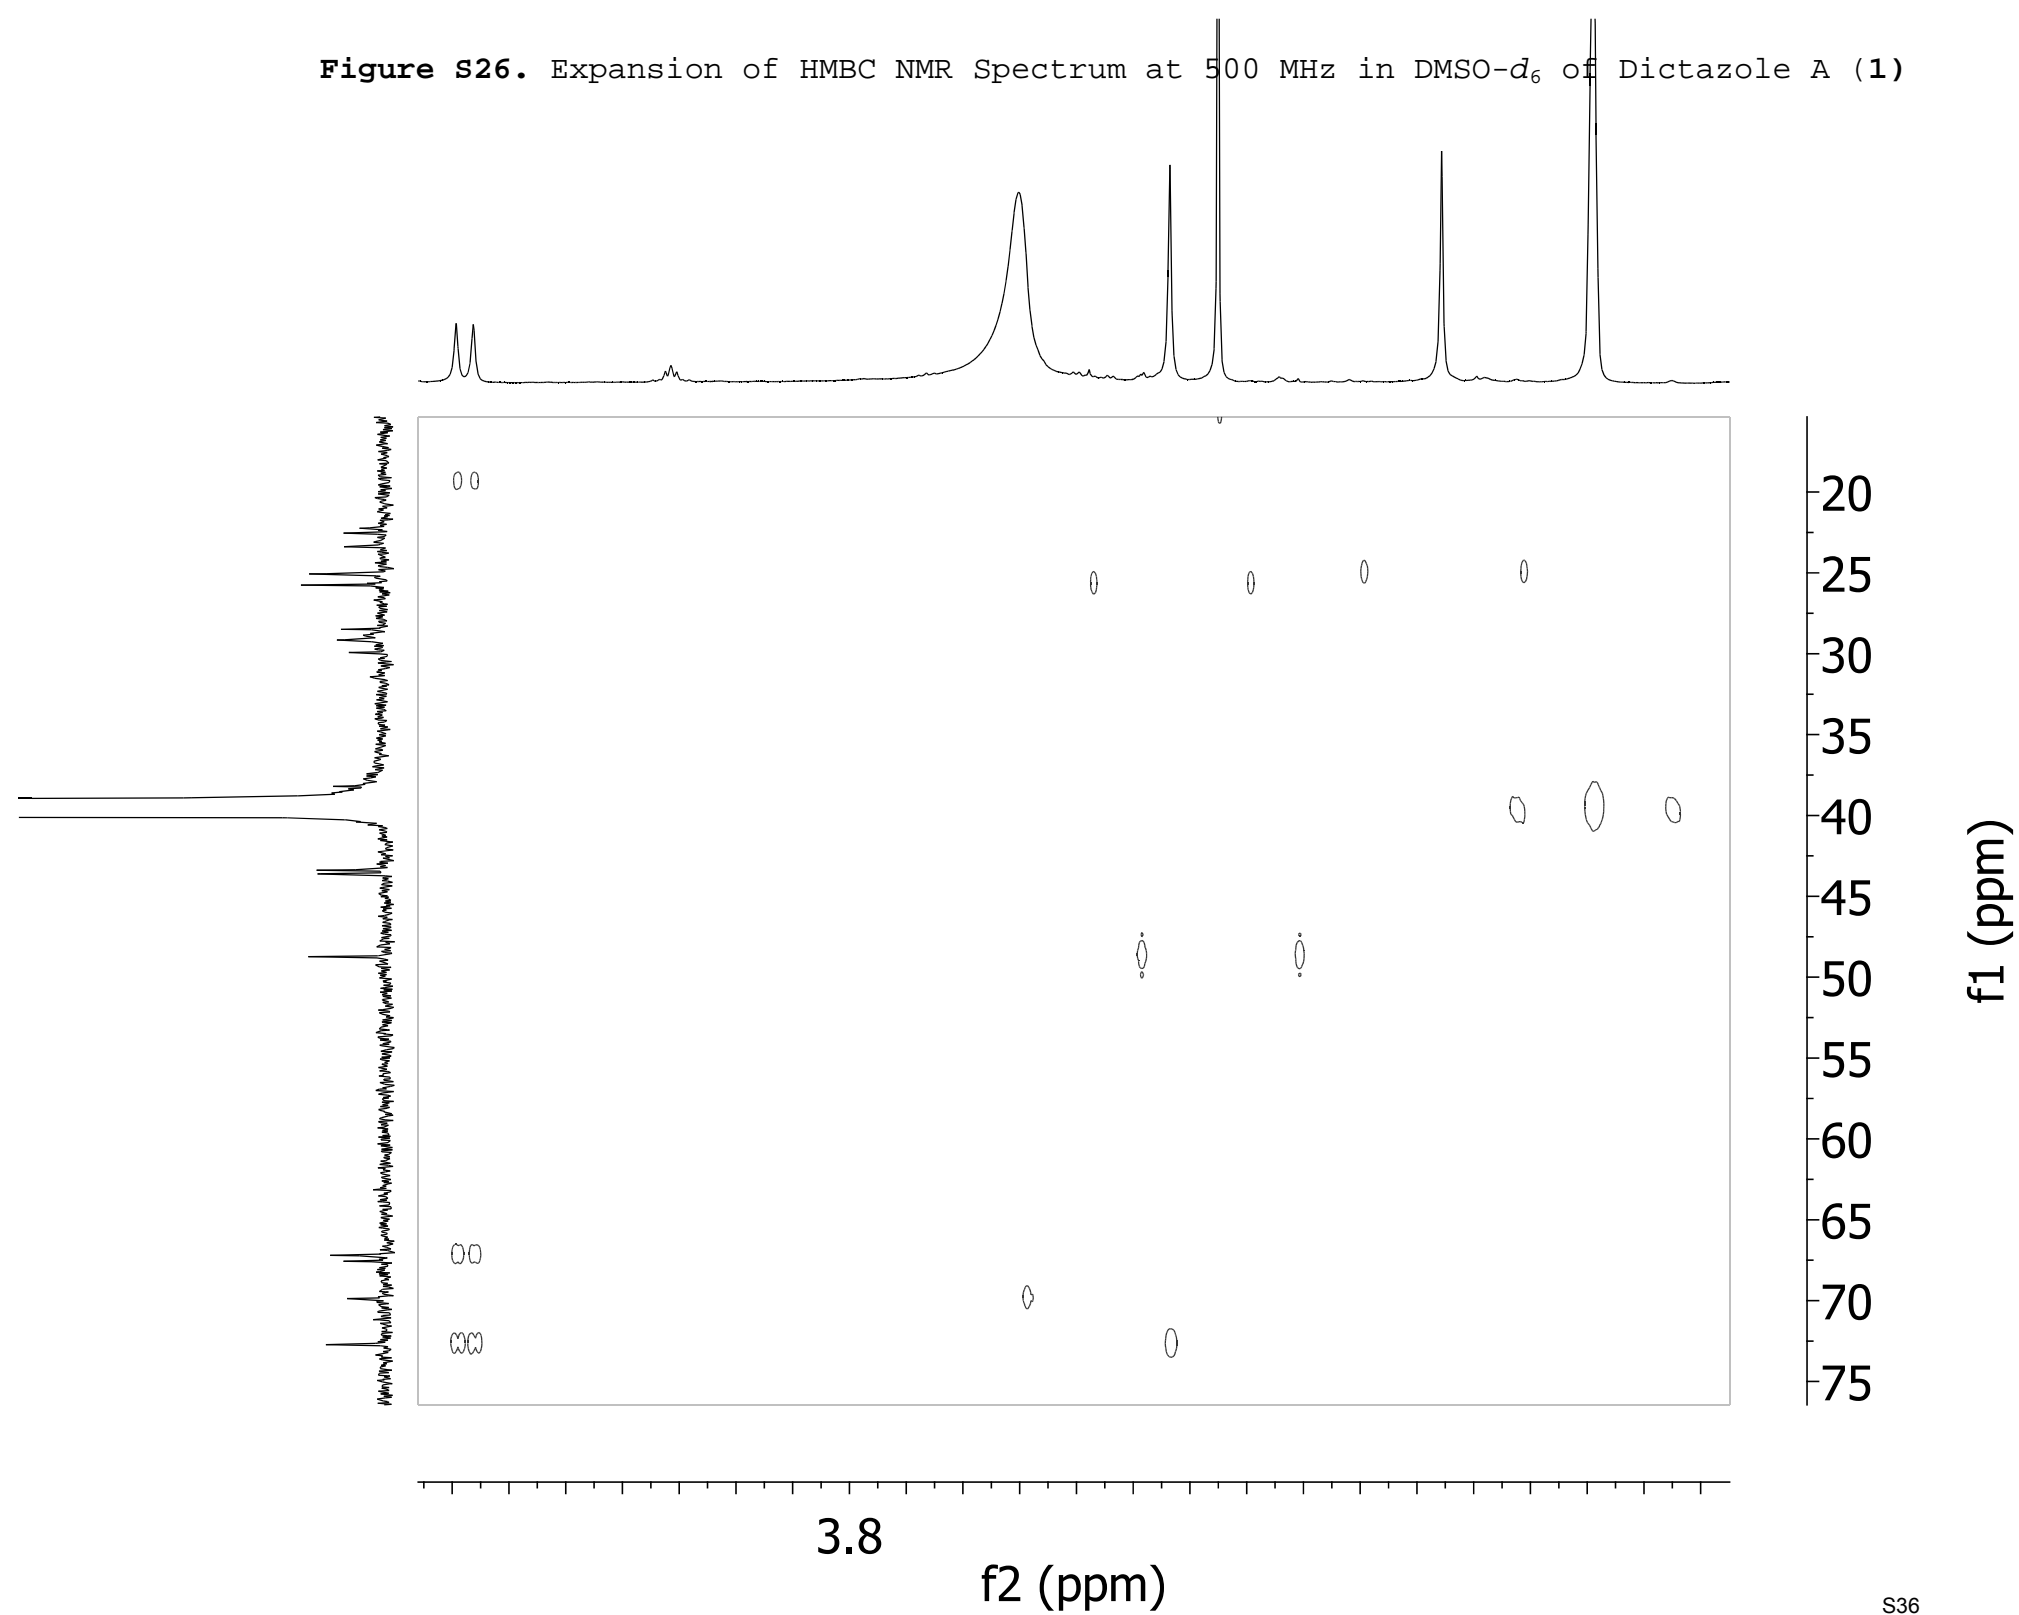

Figure S27.  $^1\text{H}$  NMR Spectrum at 500 MHz in  $\text{DMSO-}d_6$  of Dictazole B (**2**)

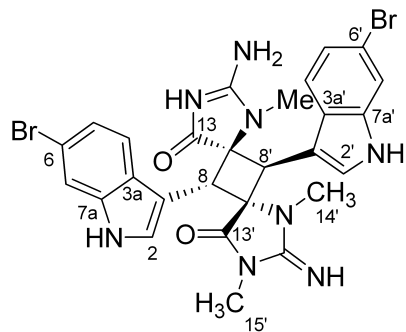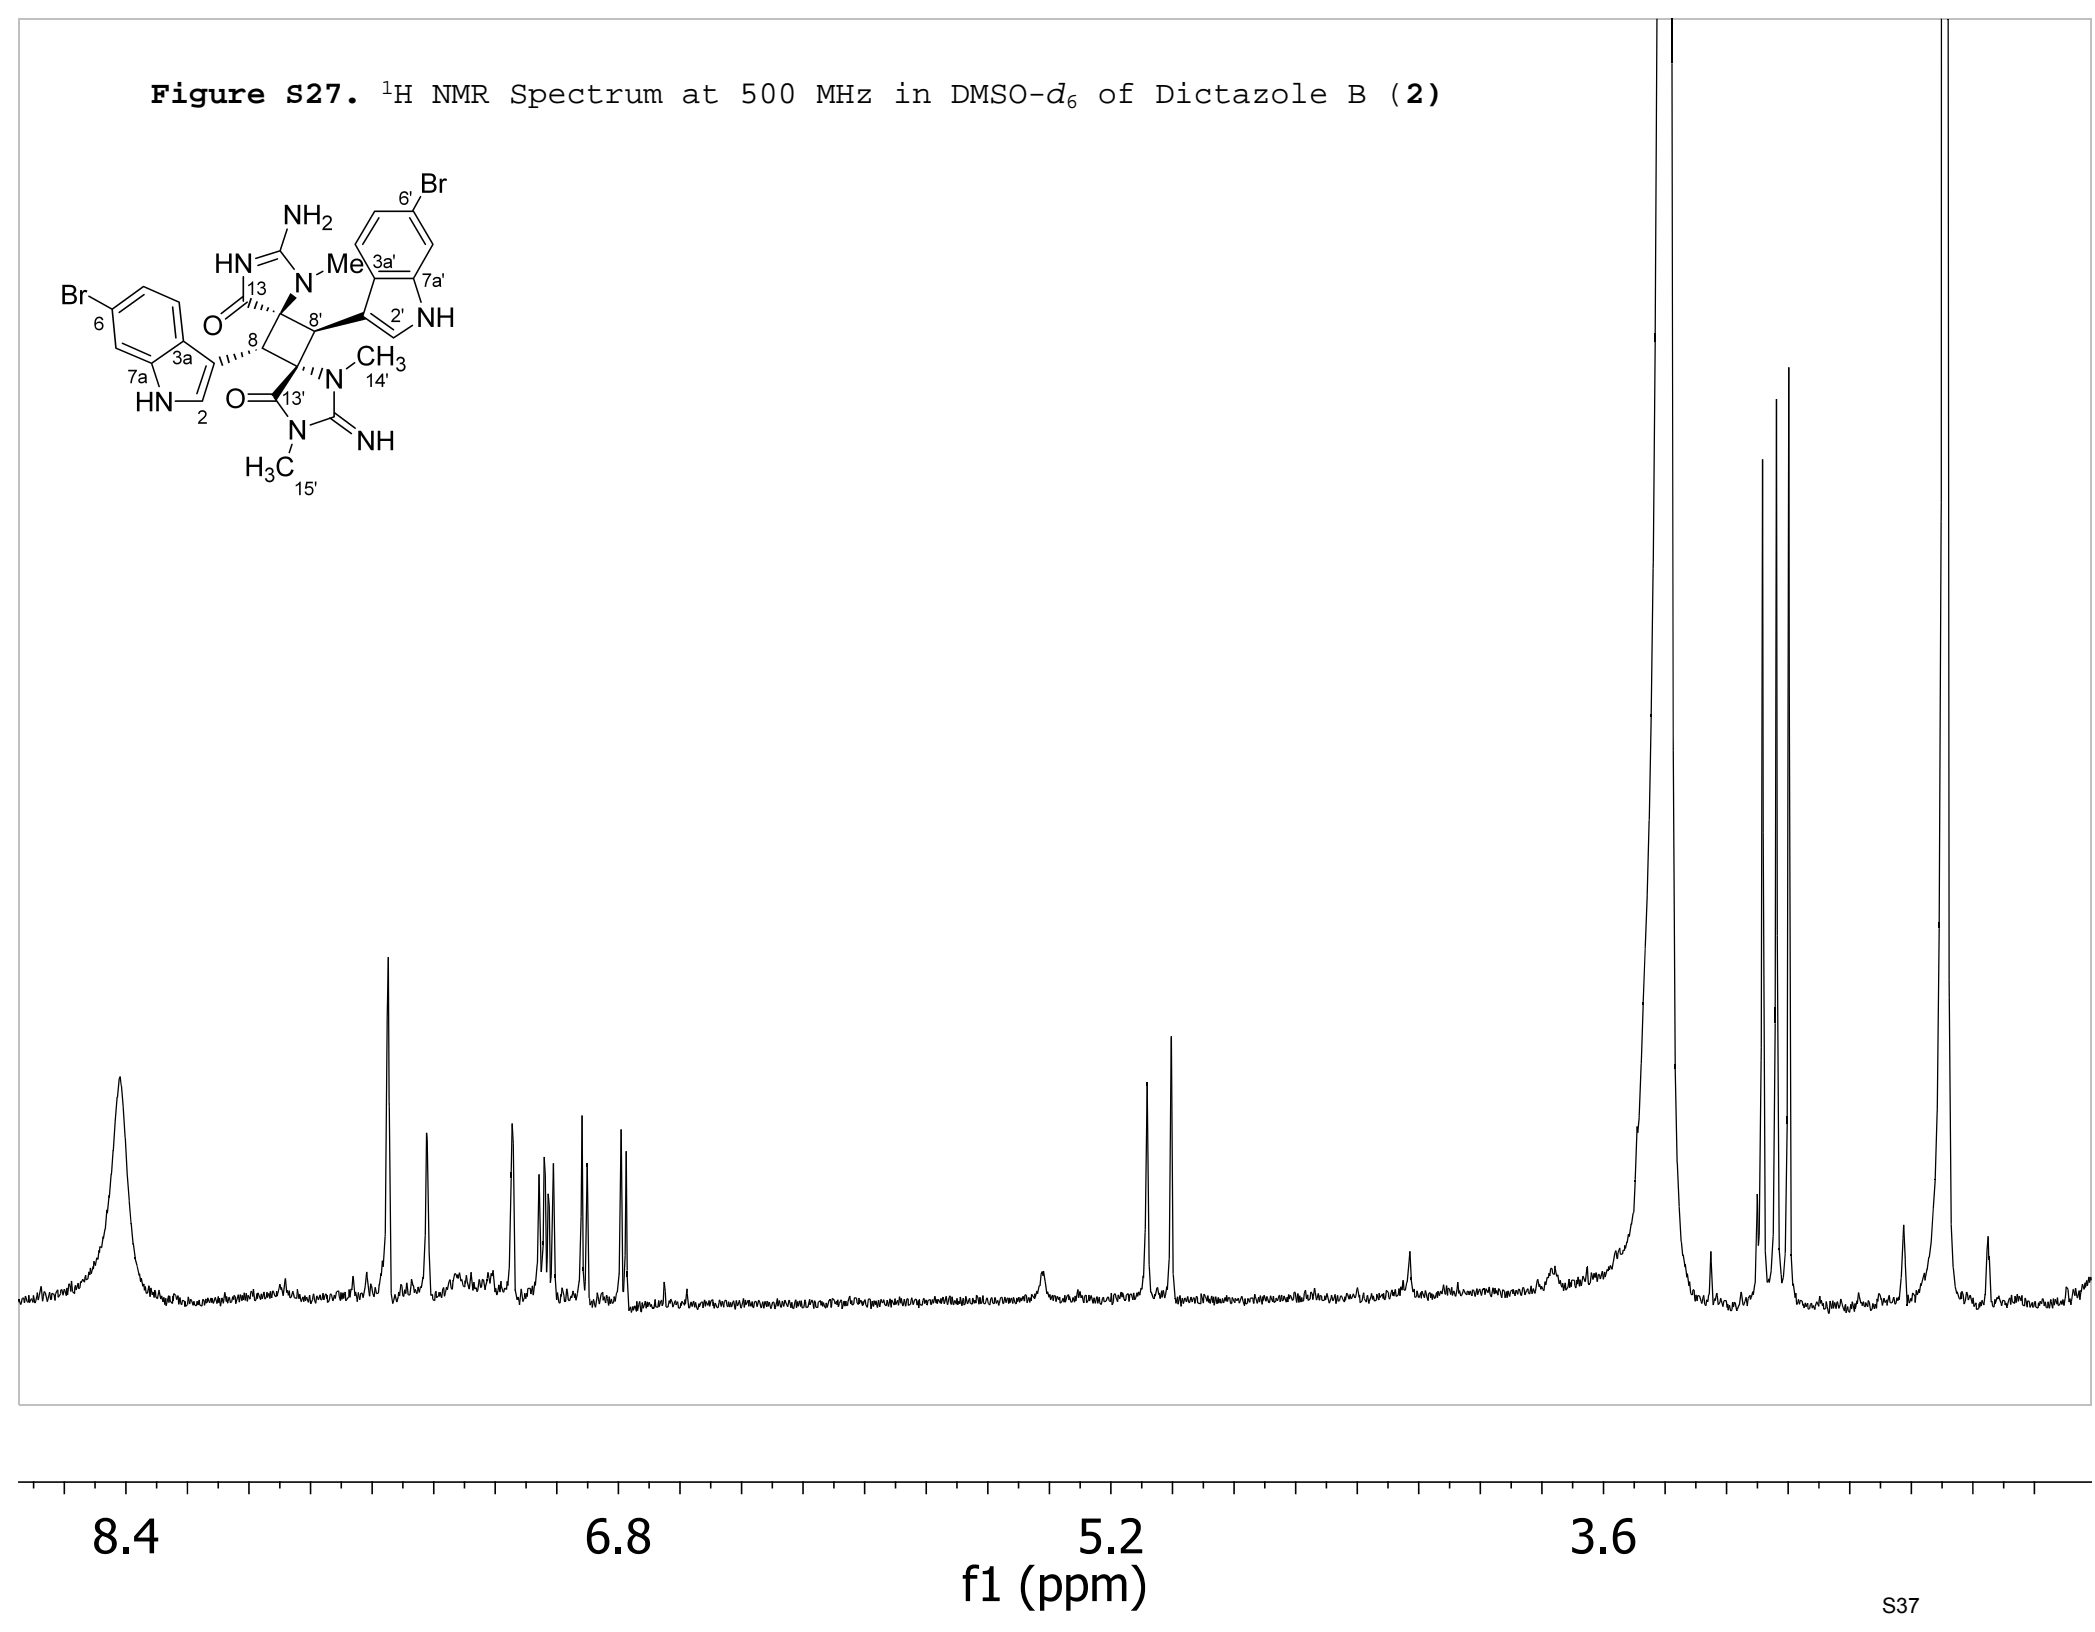

Figure S28. COSY Spectrum at 500 MHz in DMSO- $d_6$  of Dictazole B (2)

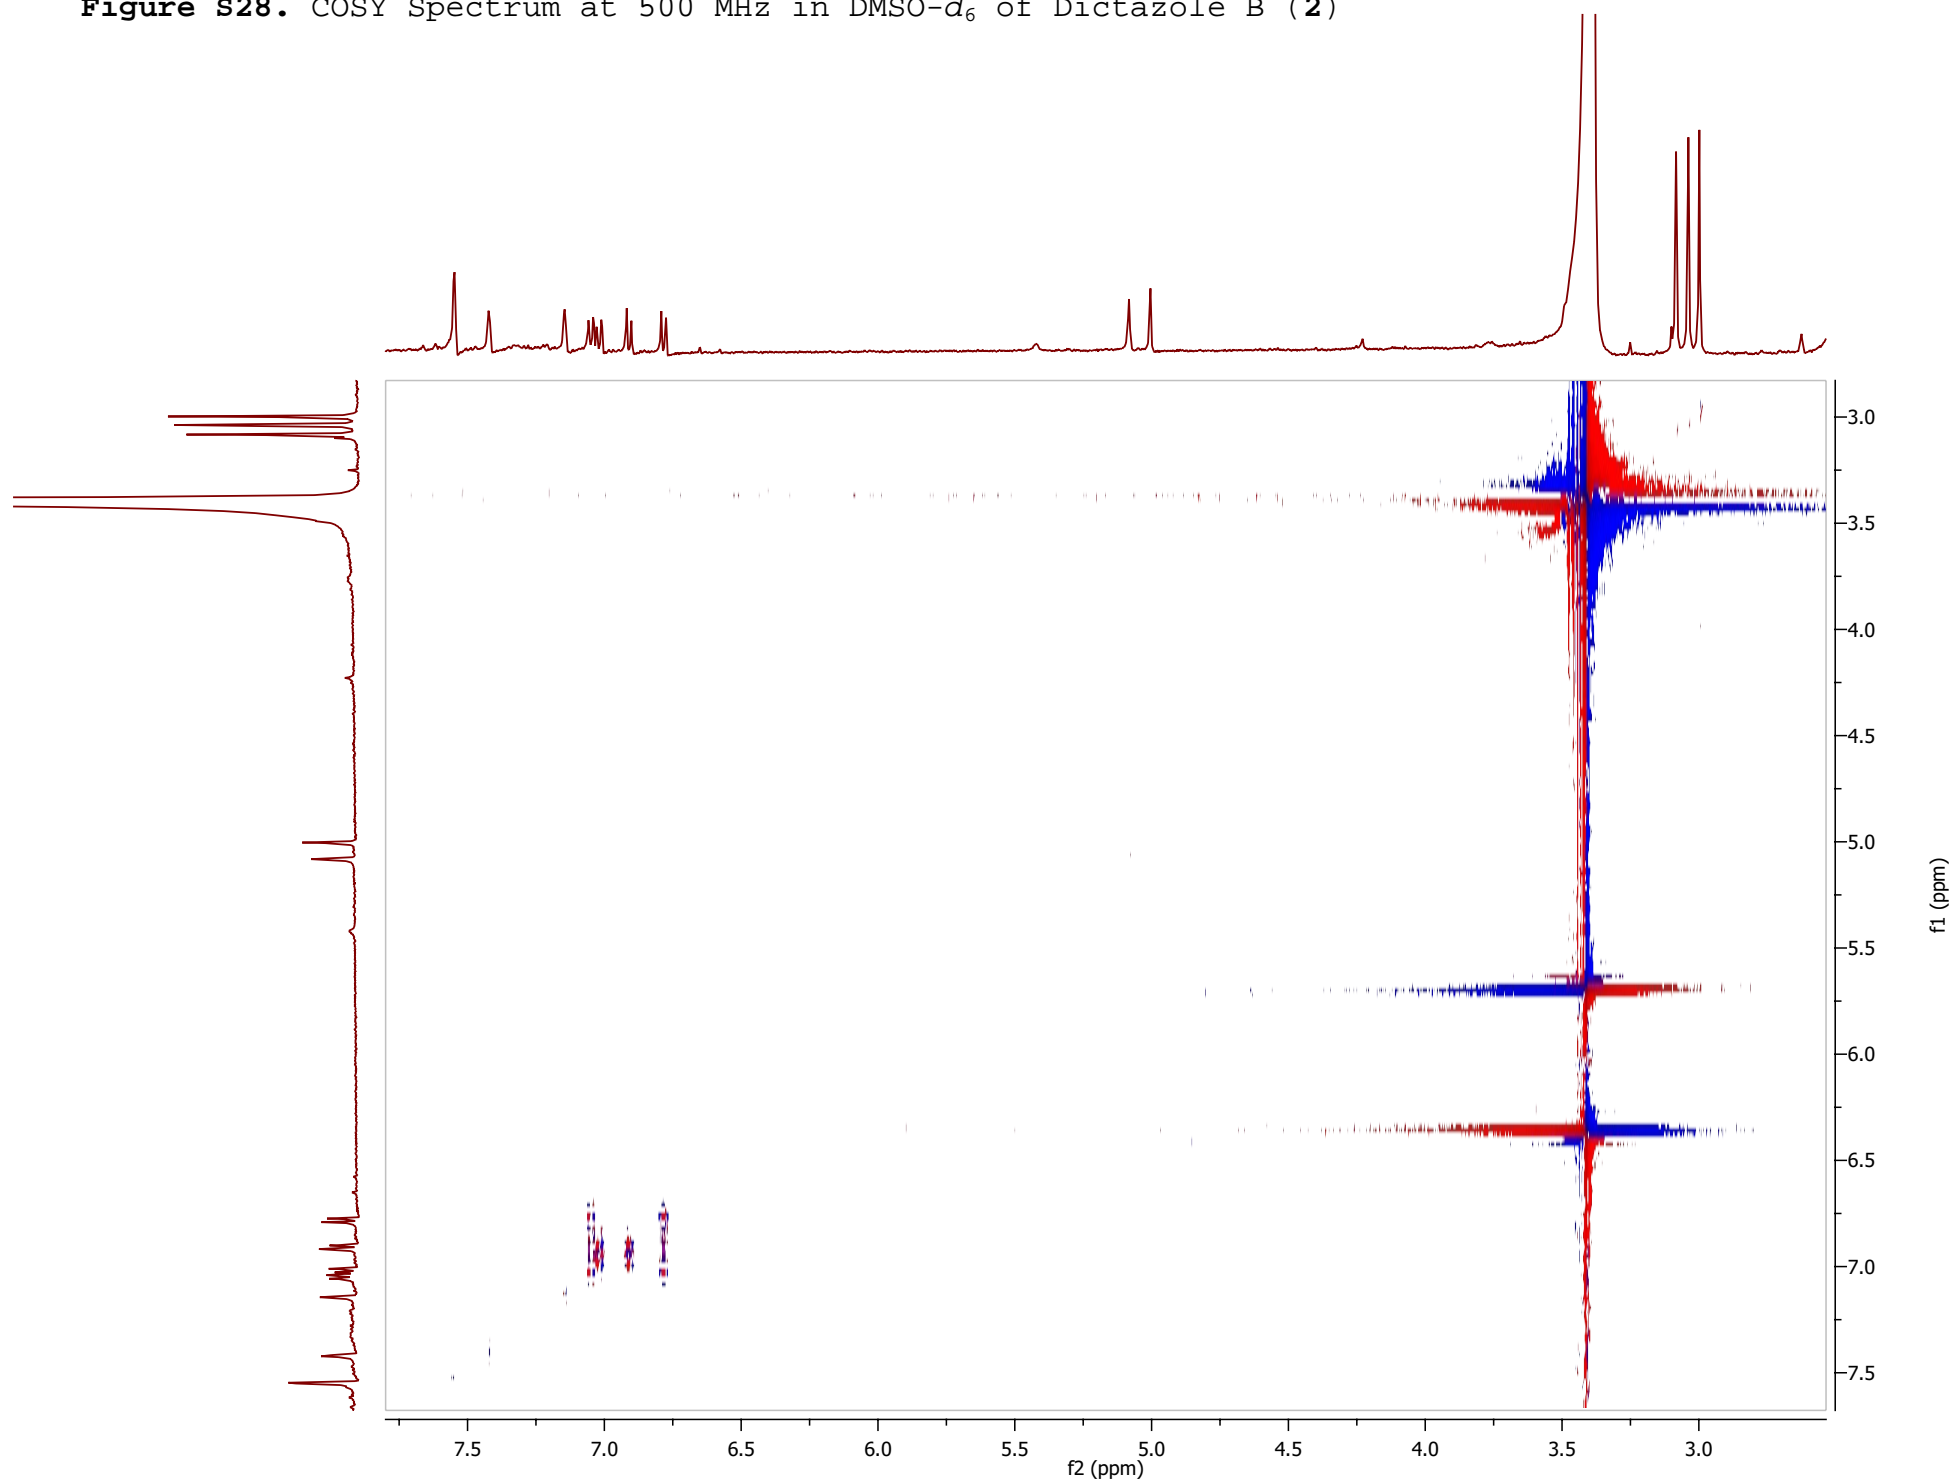

Figure S29. HSQC Spectrum at 500 MHz in DMSO- $d_6$  of Dictazole B (2)

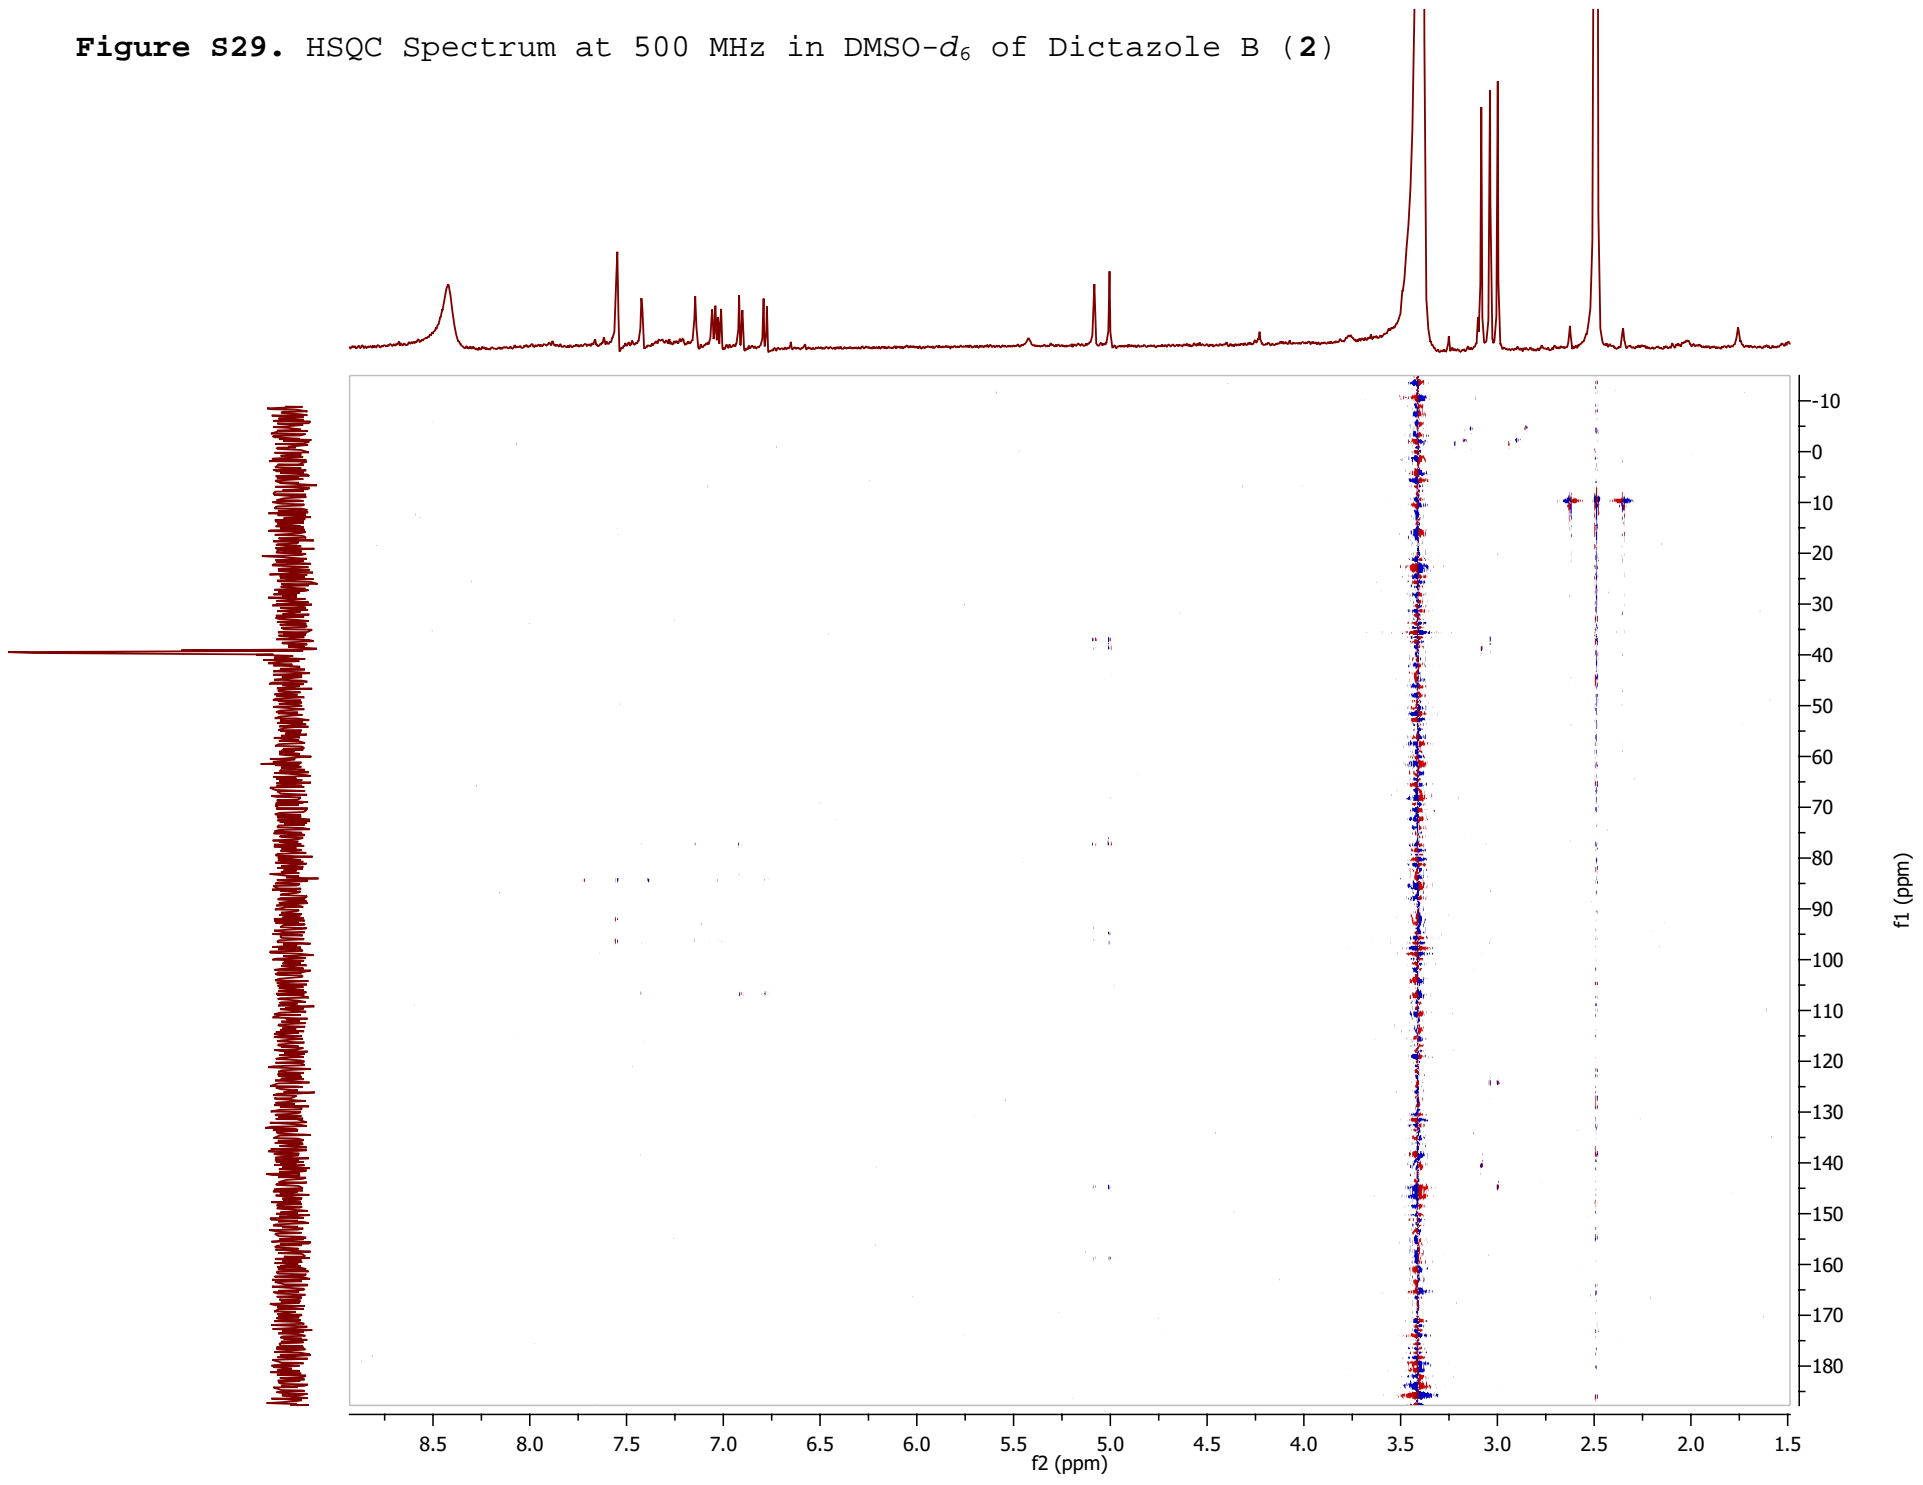

Figure S30. Expansion of HSQC Spectrum at 500 MHz in DMSO- $d_6$  of Dictazole B (2)

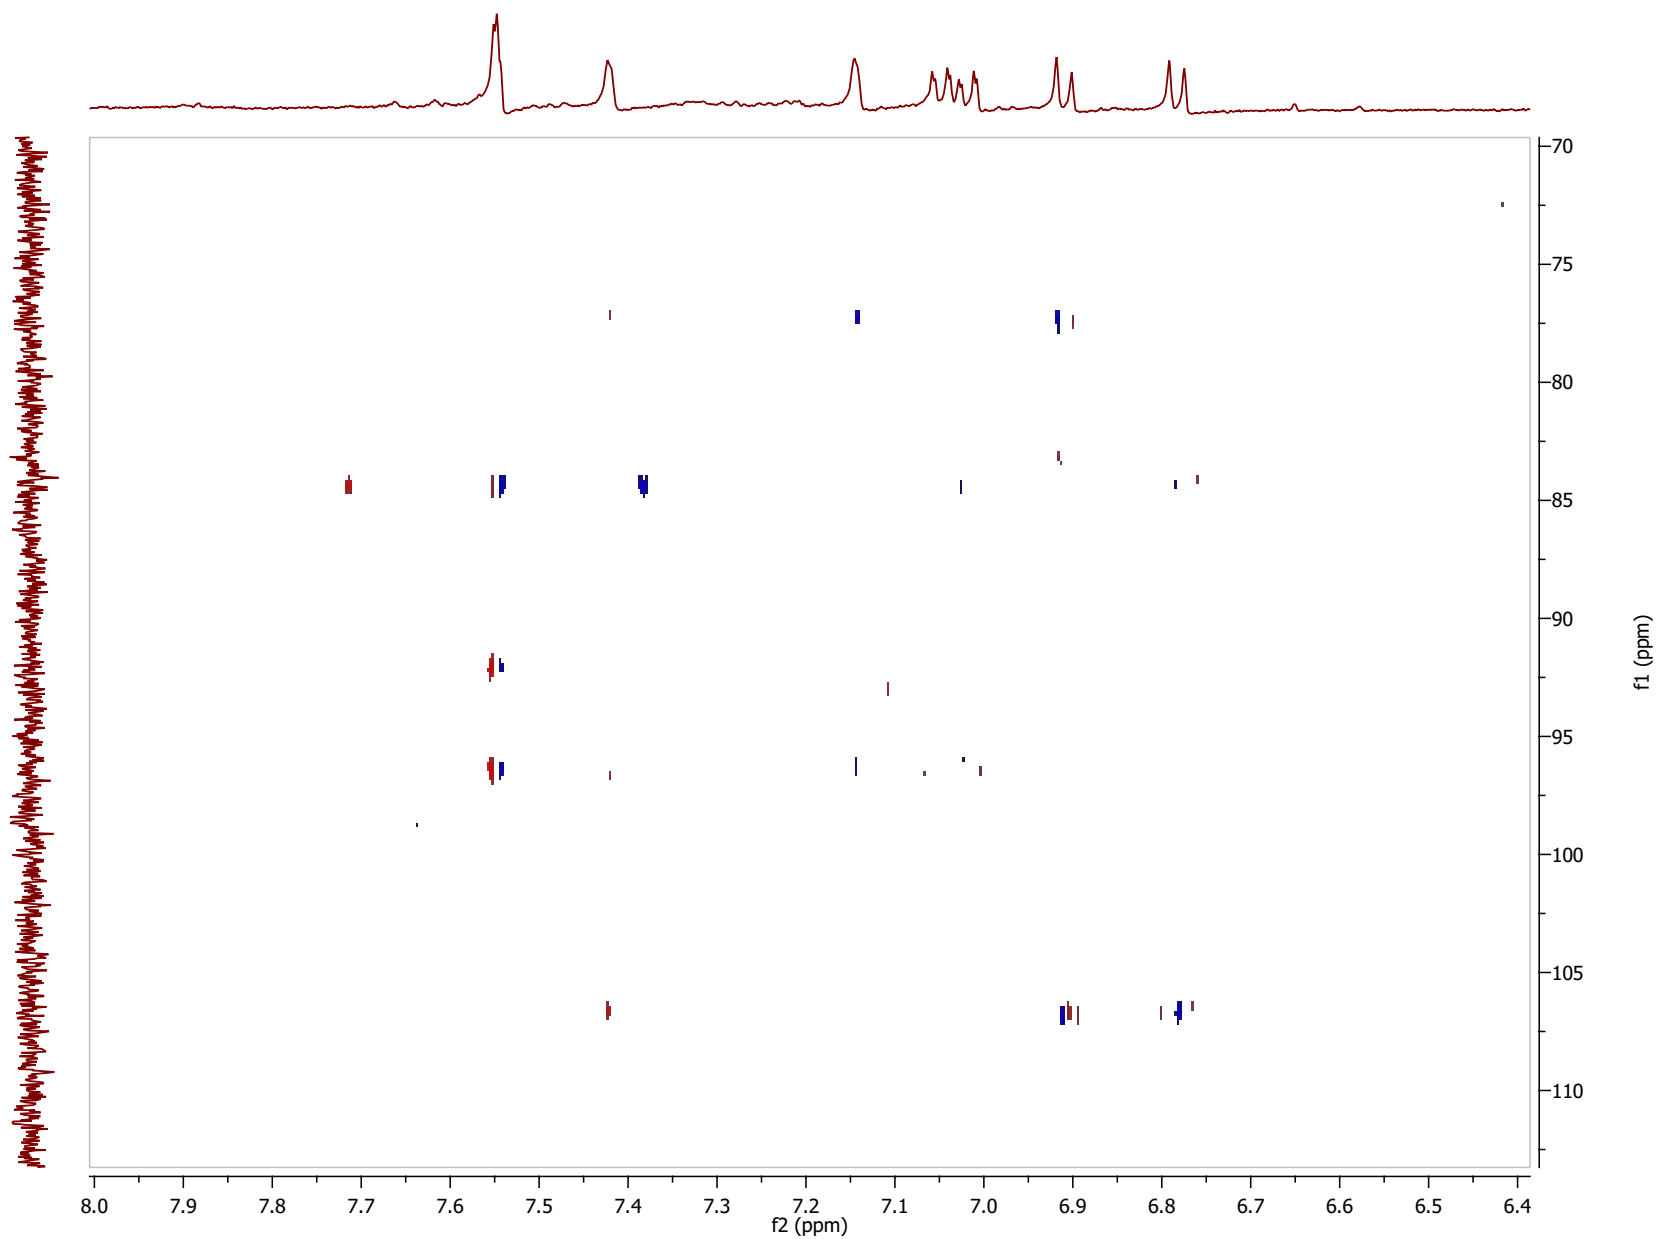



Figure S31. HMBC Spectrum at 500 MHz in DMSO- $d_6$  of Dictazole B (2)

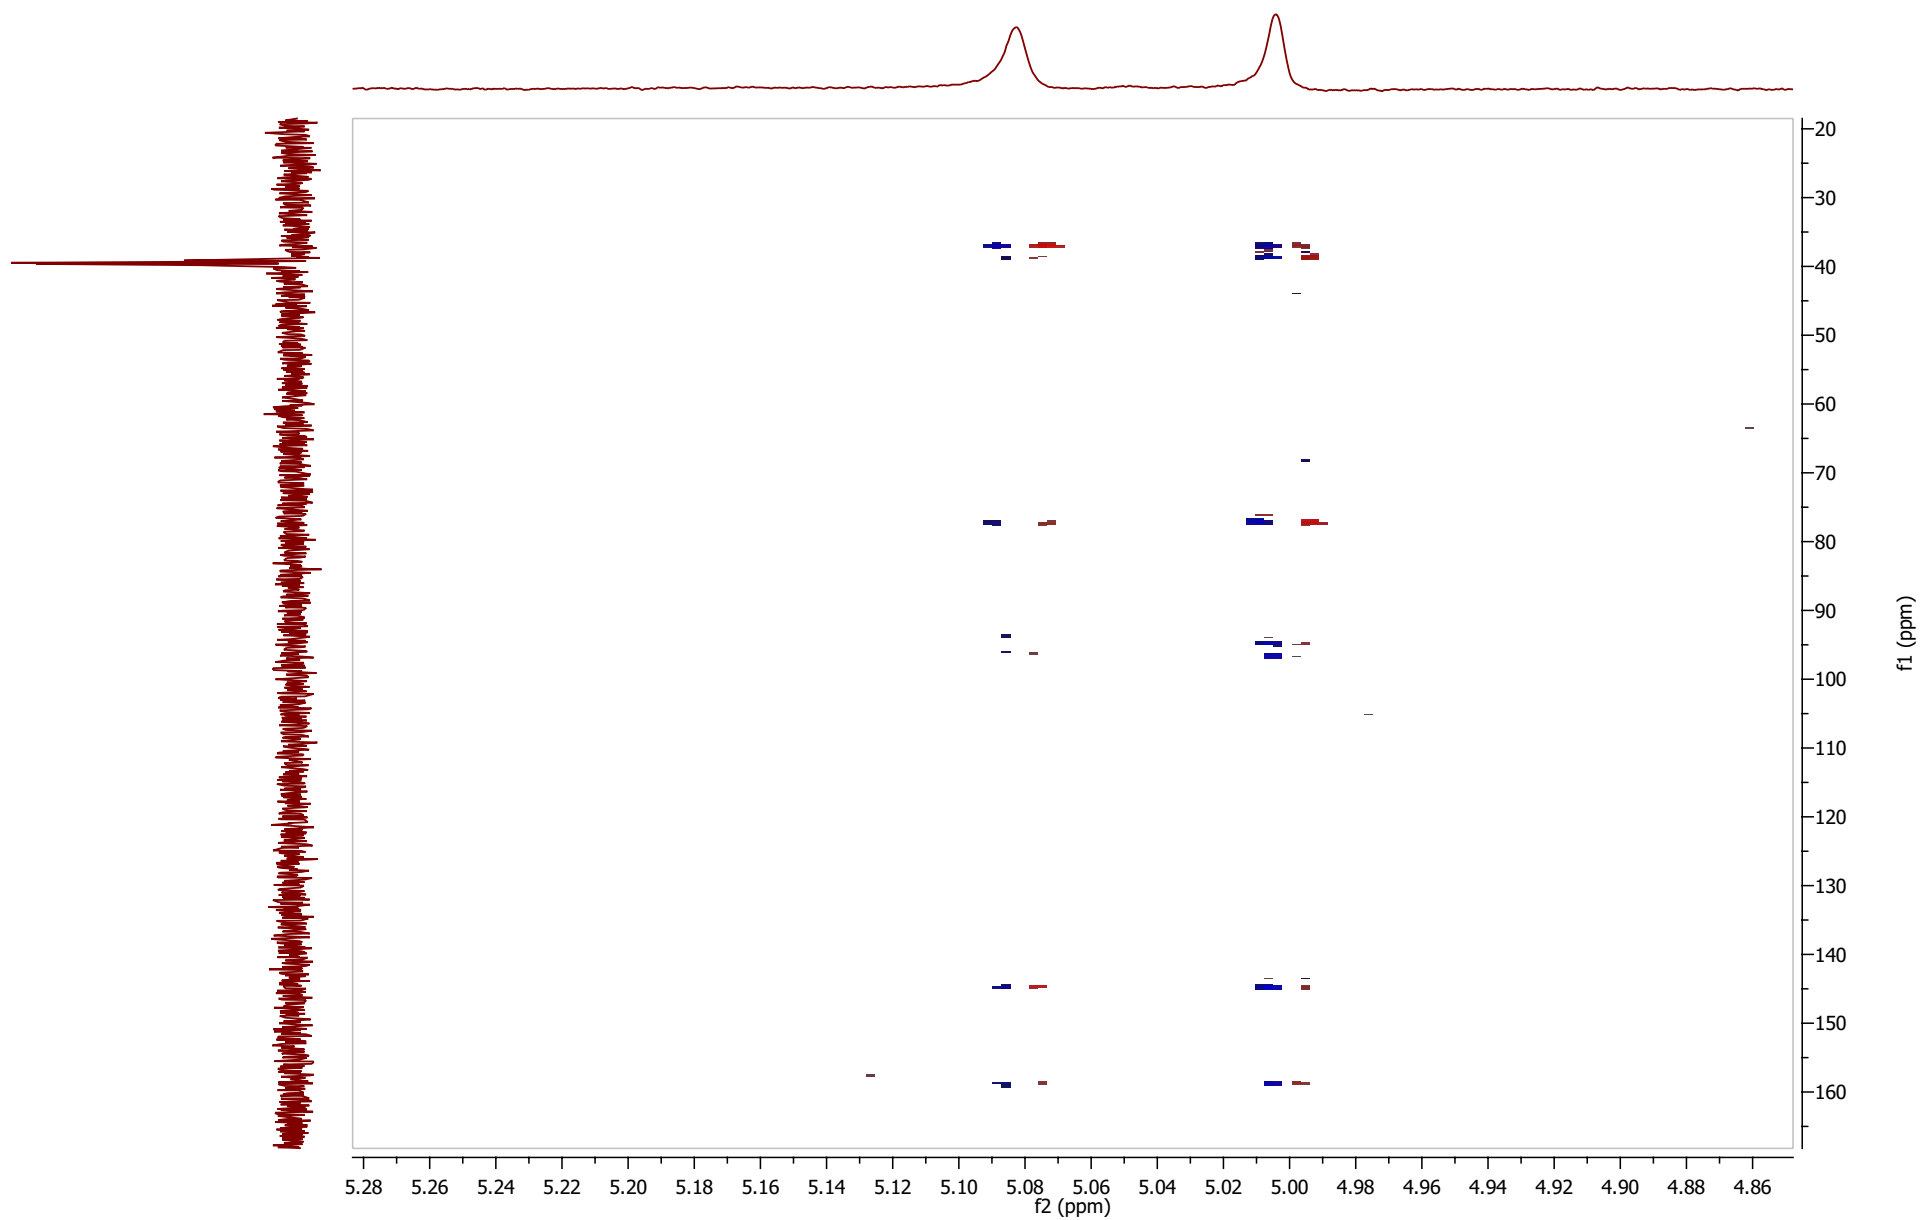

Figure S32. Expansion of HMBC Spectrum at 500 MHz in DMSO- $d_6$  of Dictazole B (2)

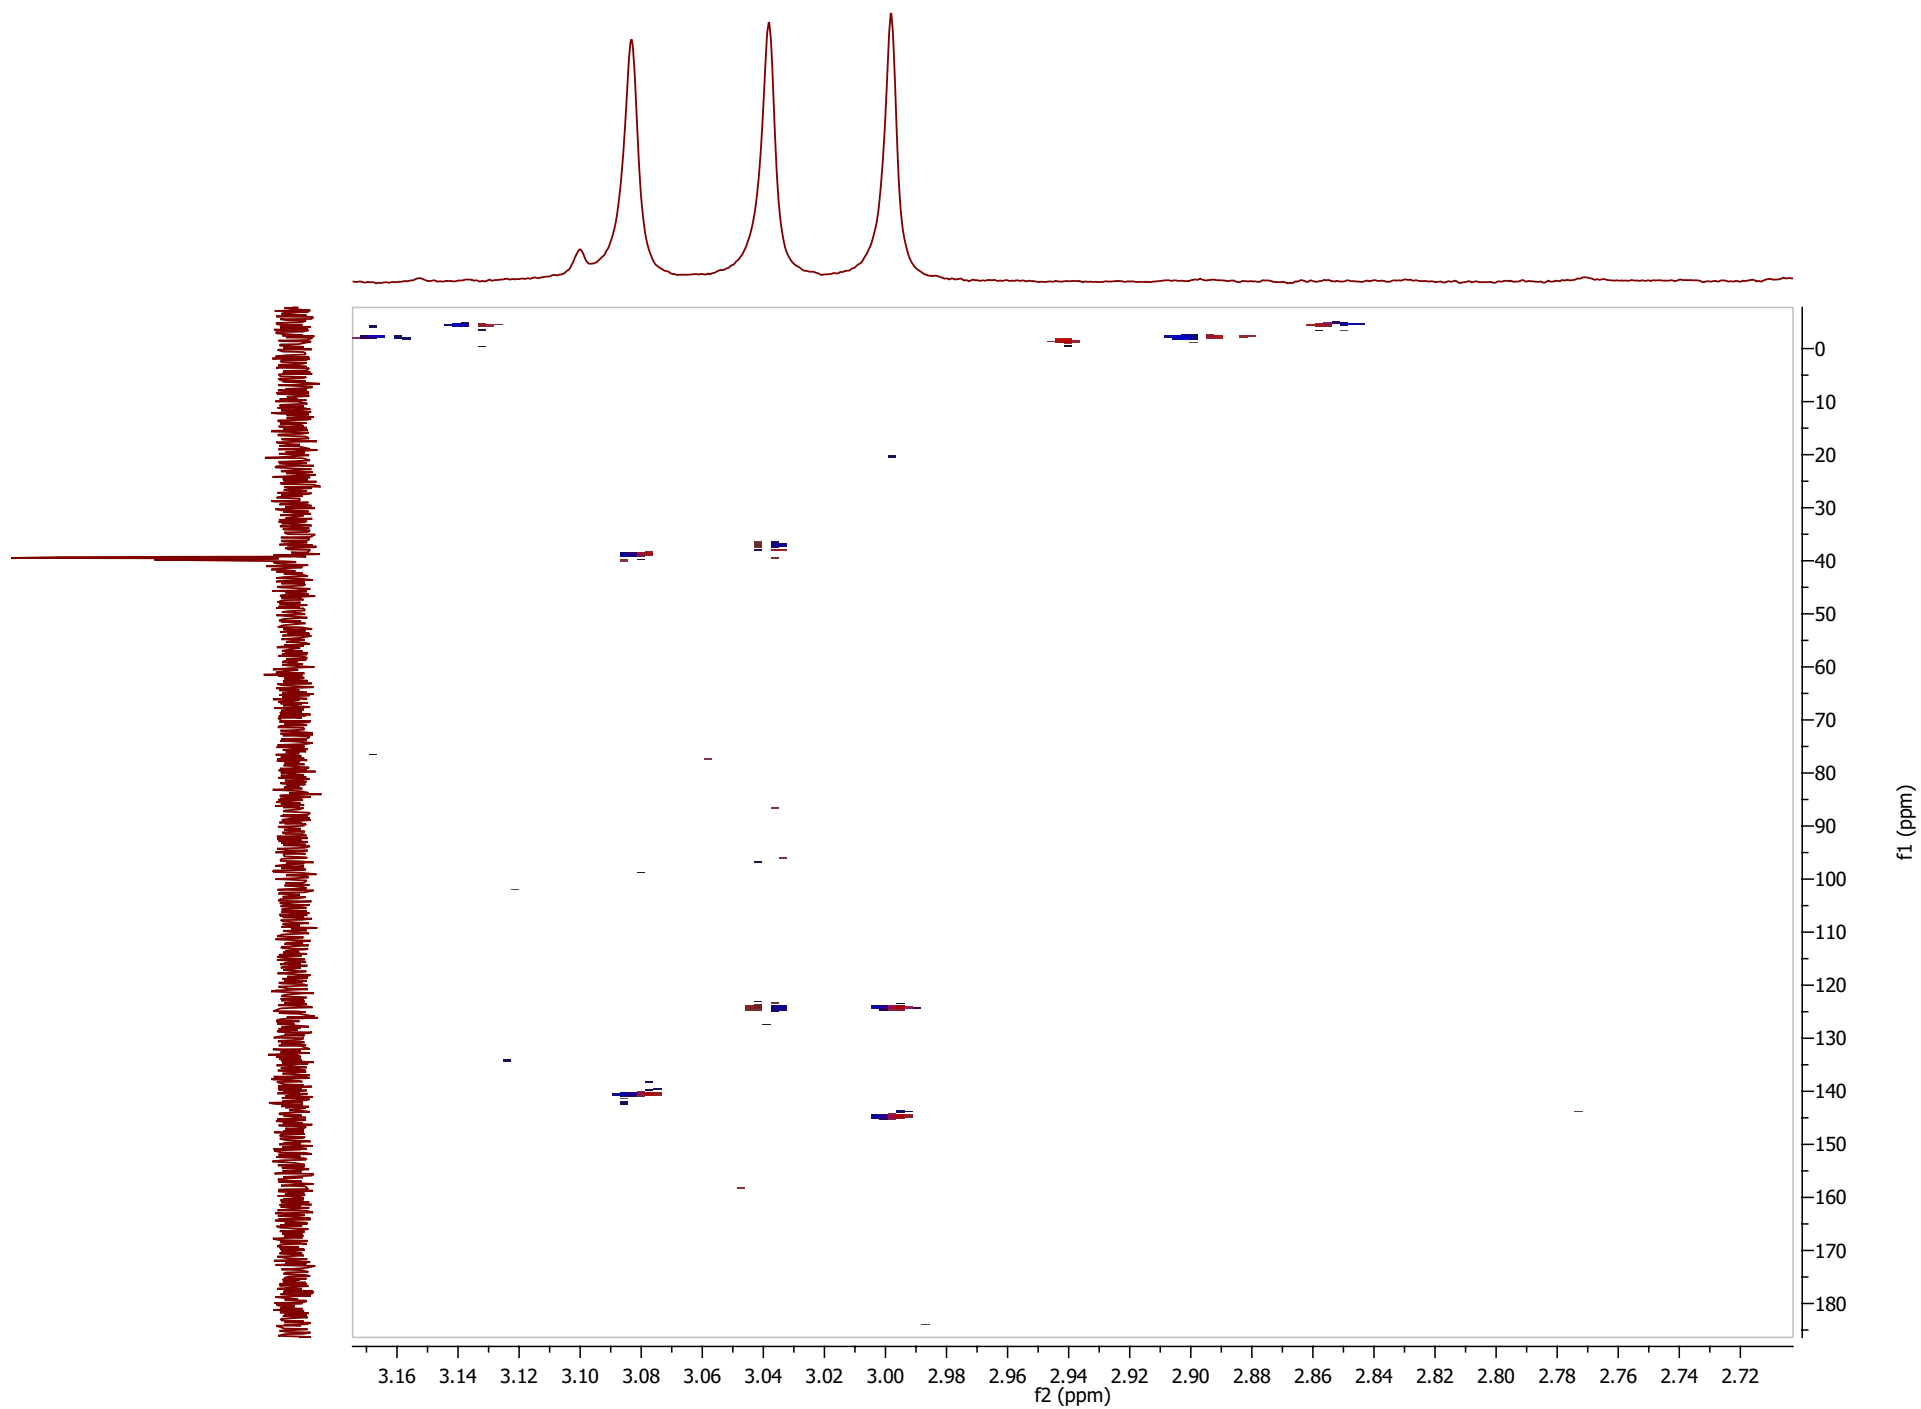

Figure S33. NOESY Spectrum at 500 MHz in DMSO- $d_6$  of Dictazole B (2)

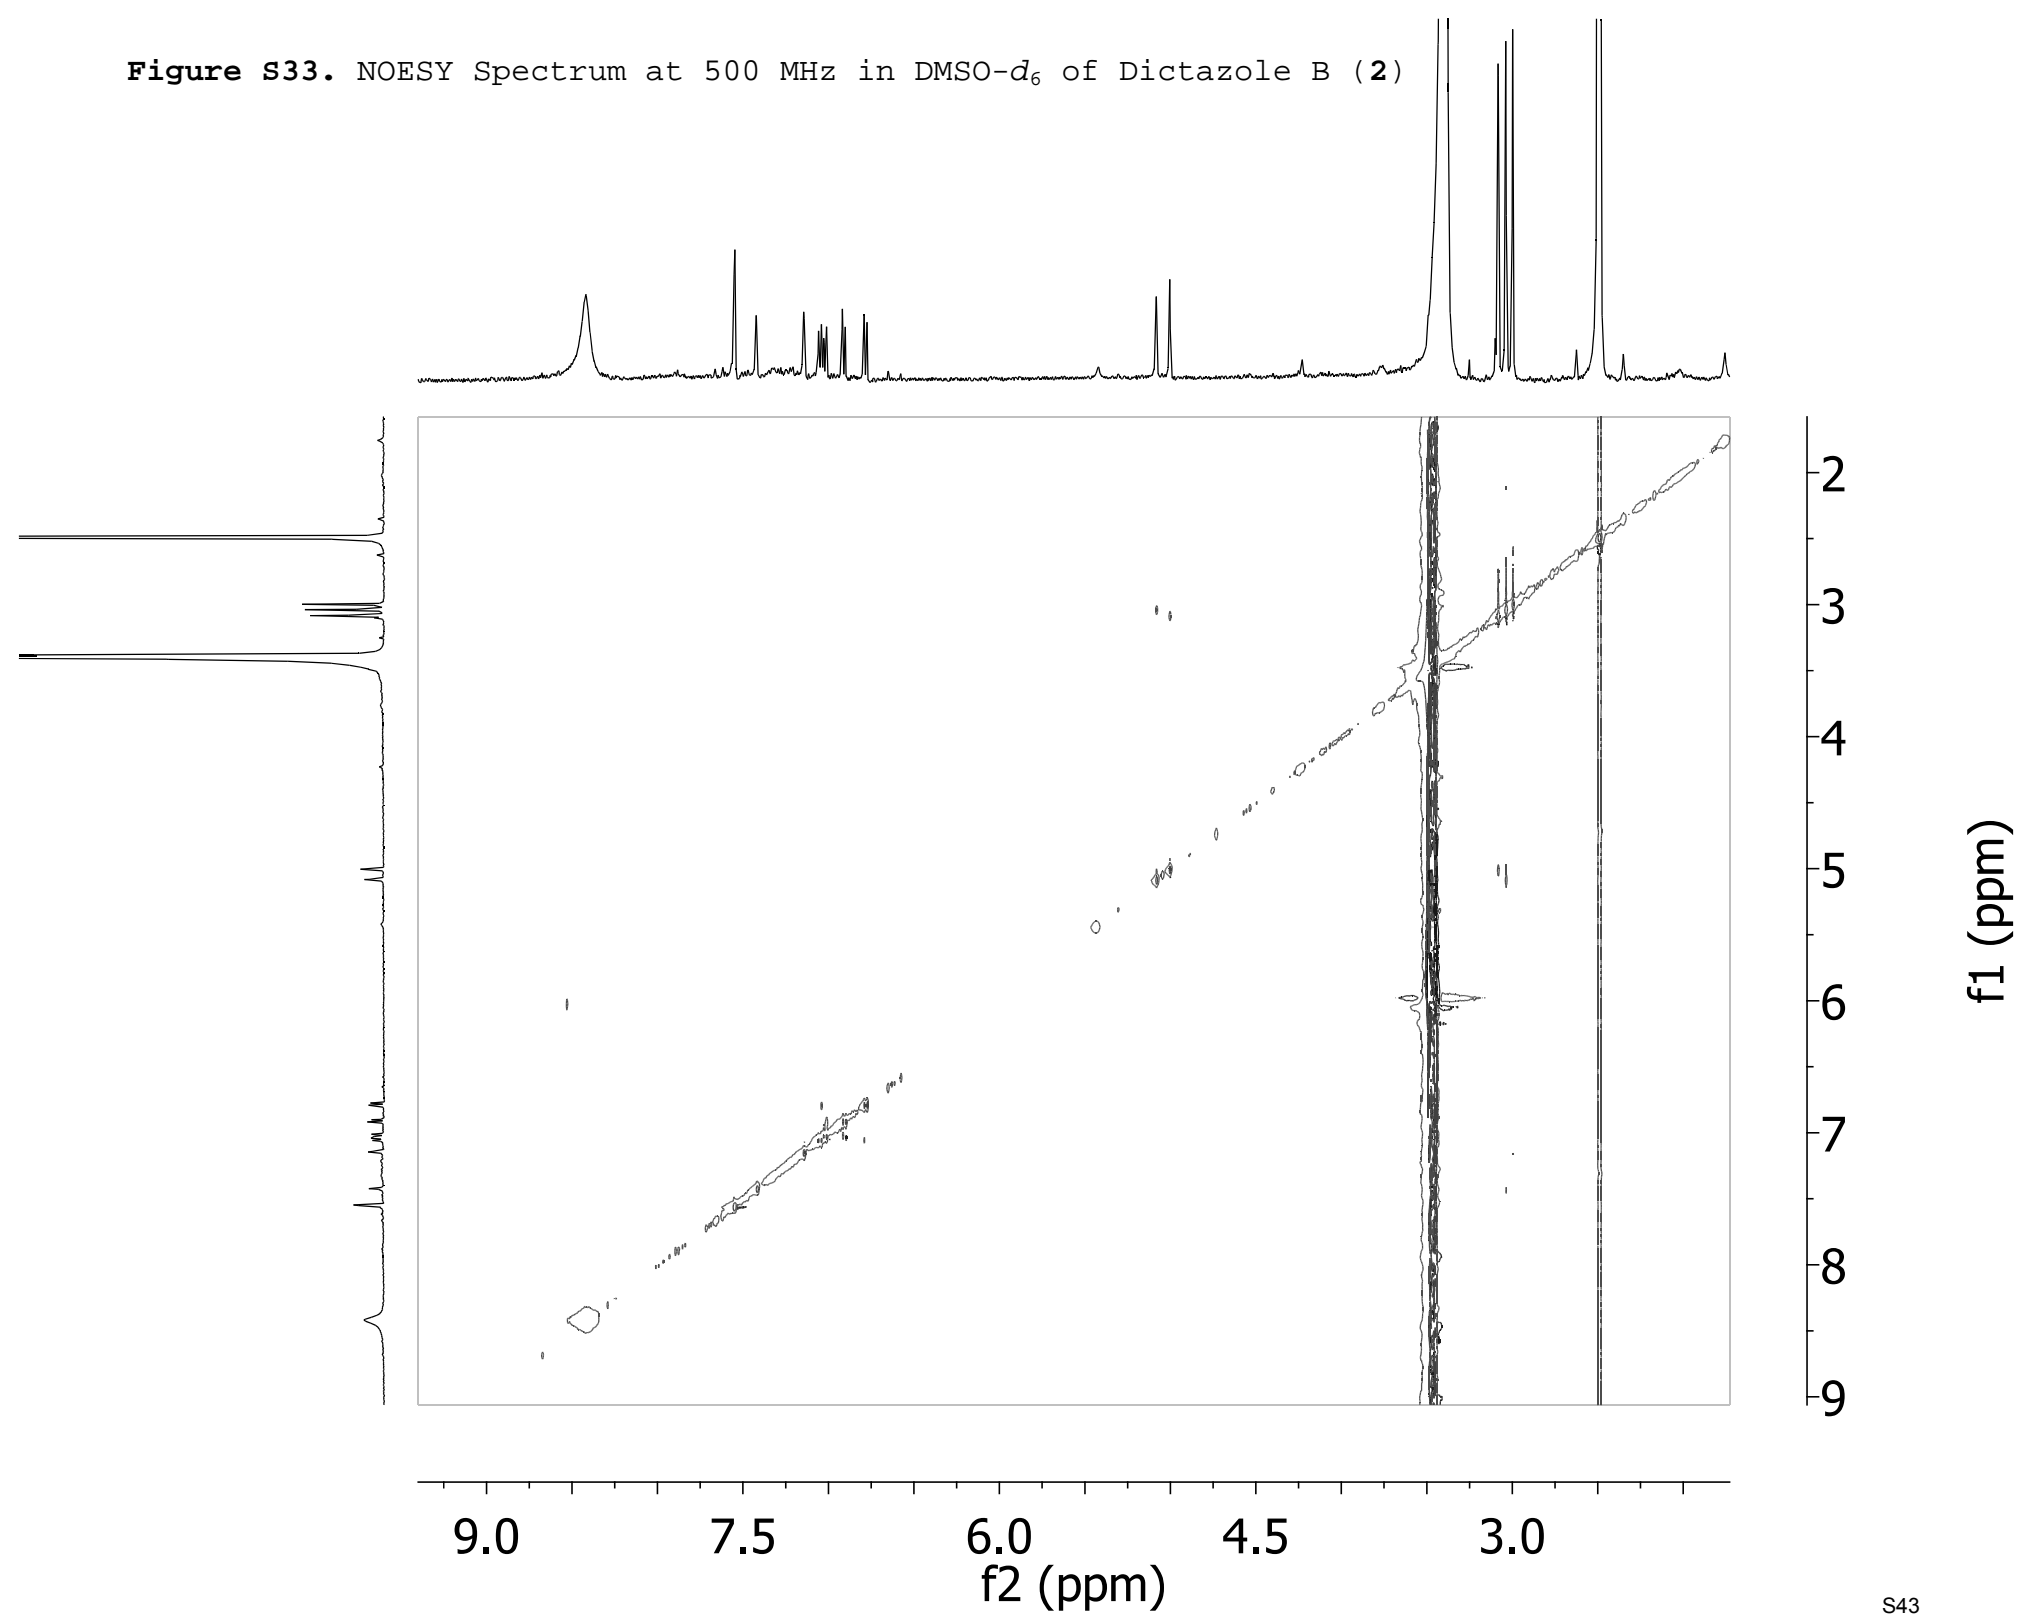

Figure S34. Expansion of NOESY Spectrum at 500 MHz in DMSO- $d_6$  of Dictazole B (2)

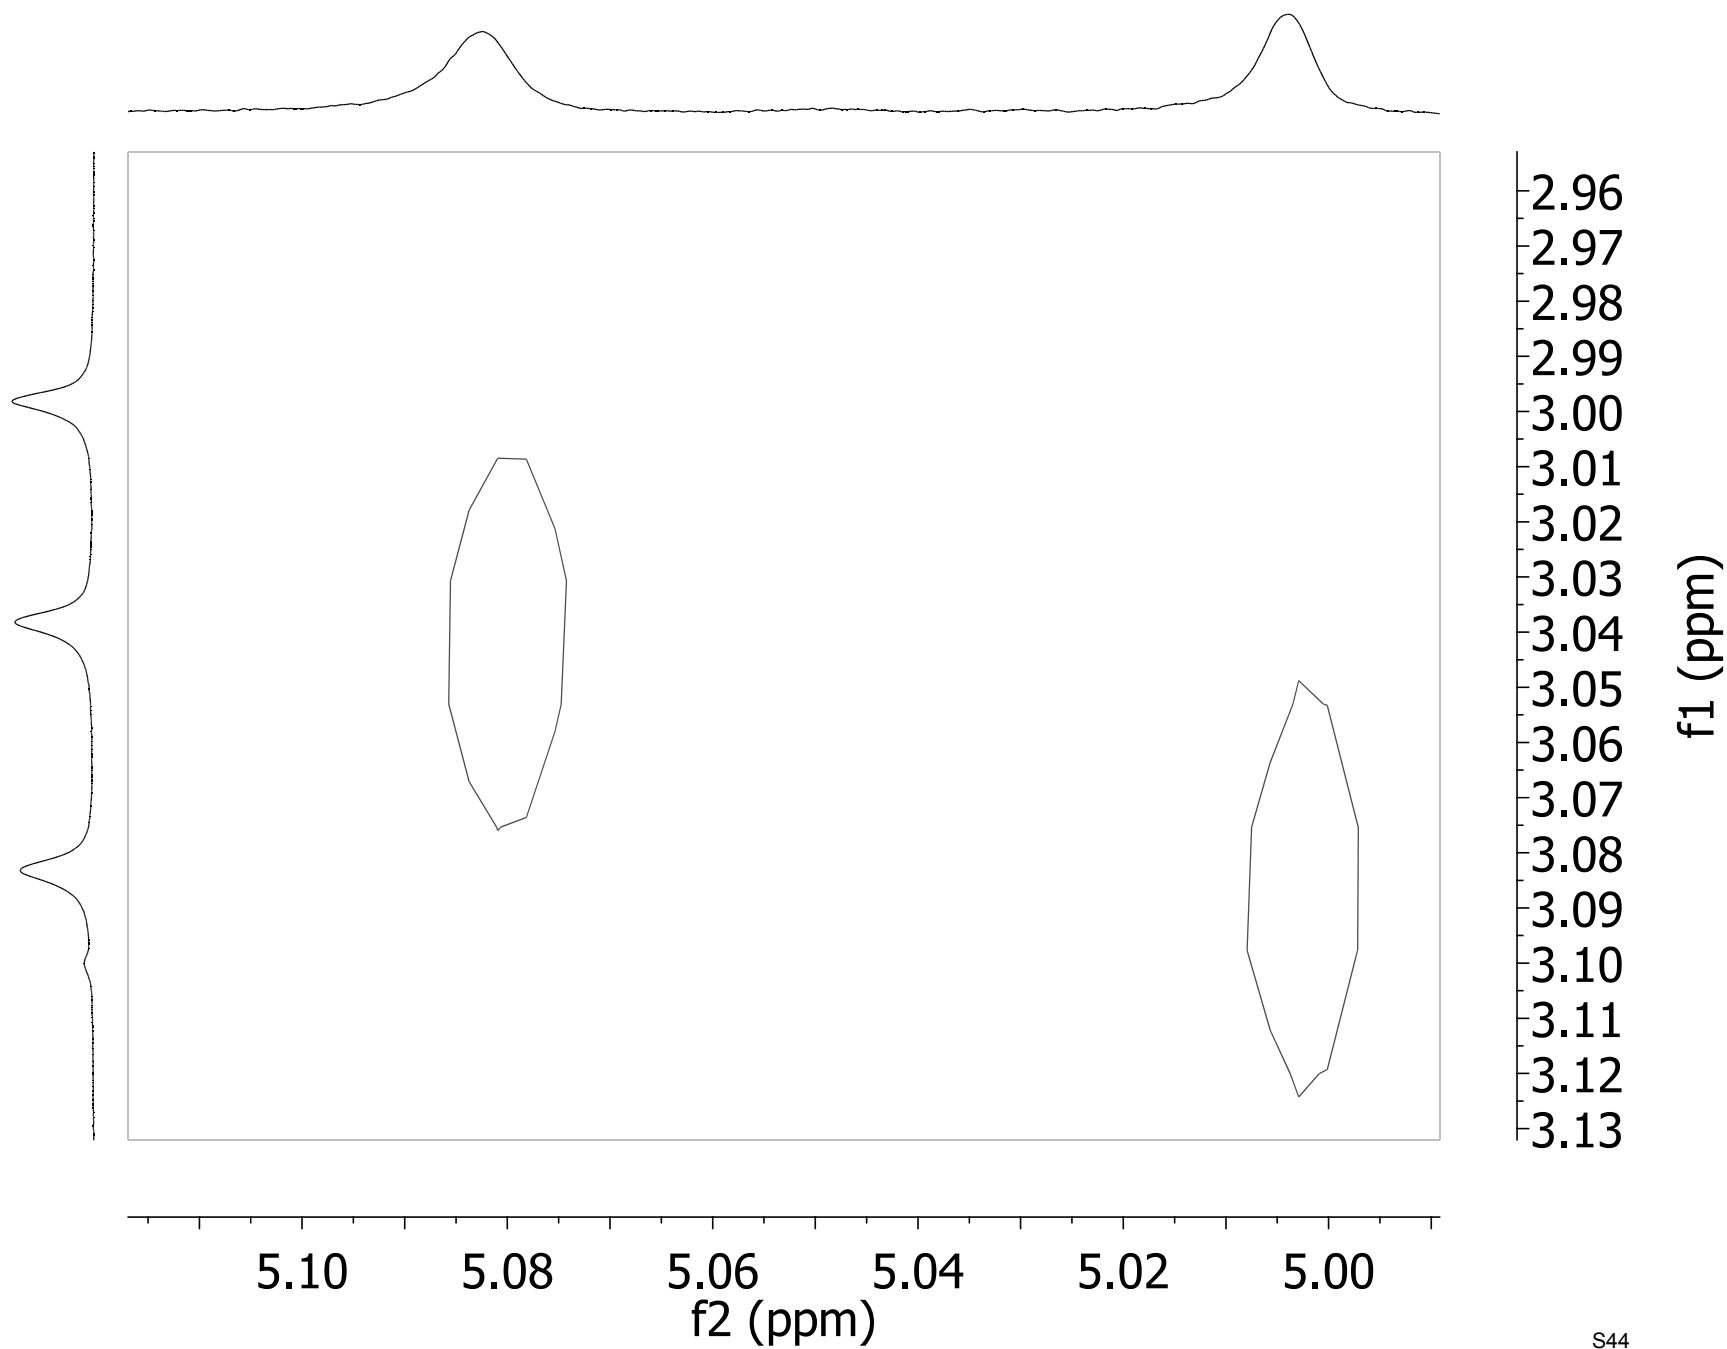

Figure S35. Expansion of NOESY Spectrum at 500 MHz in DMSO- $d_6$  of Dictazole B (2)

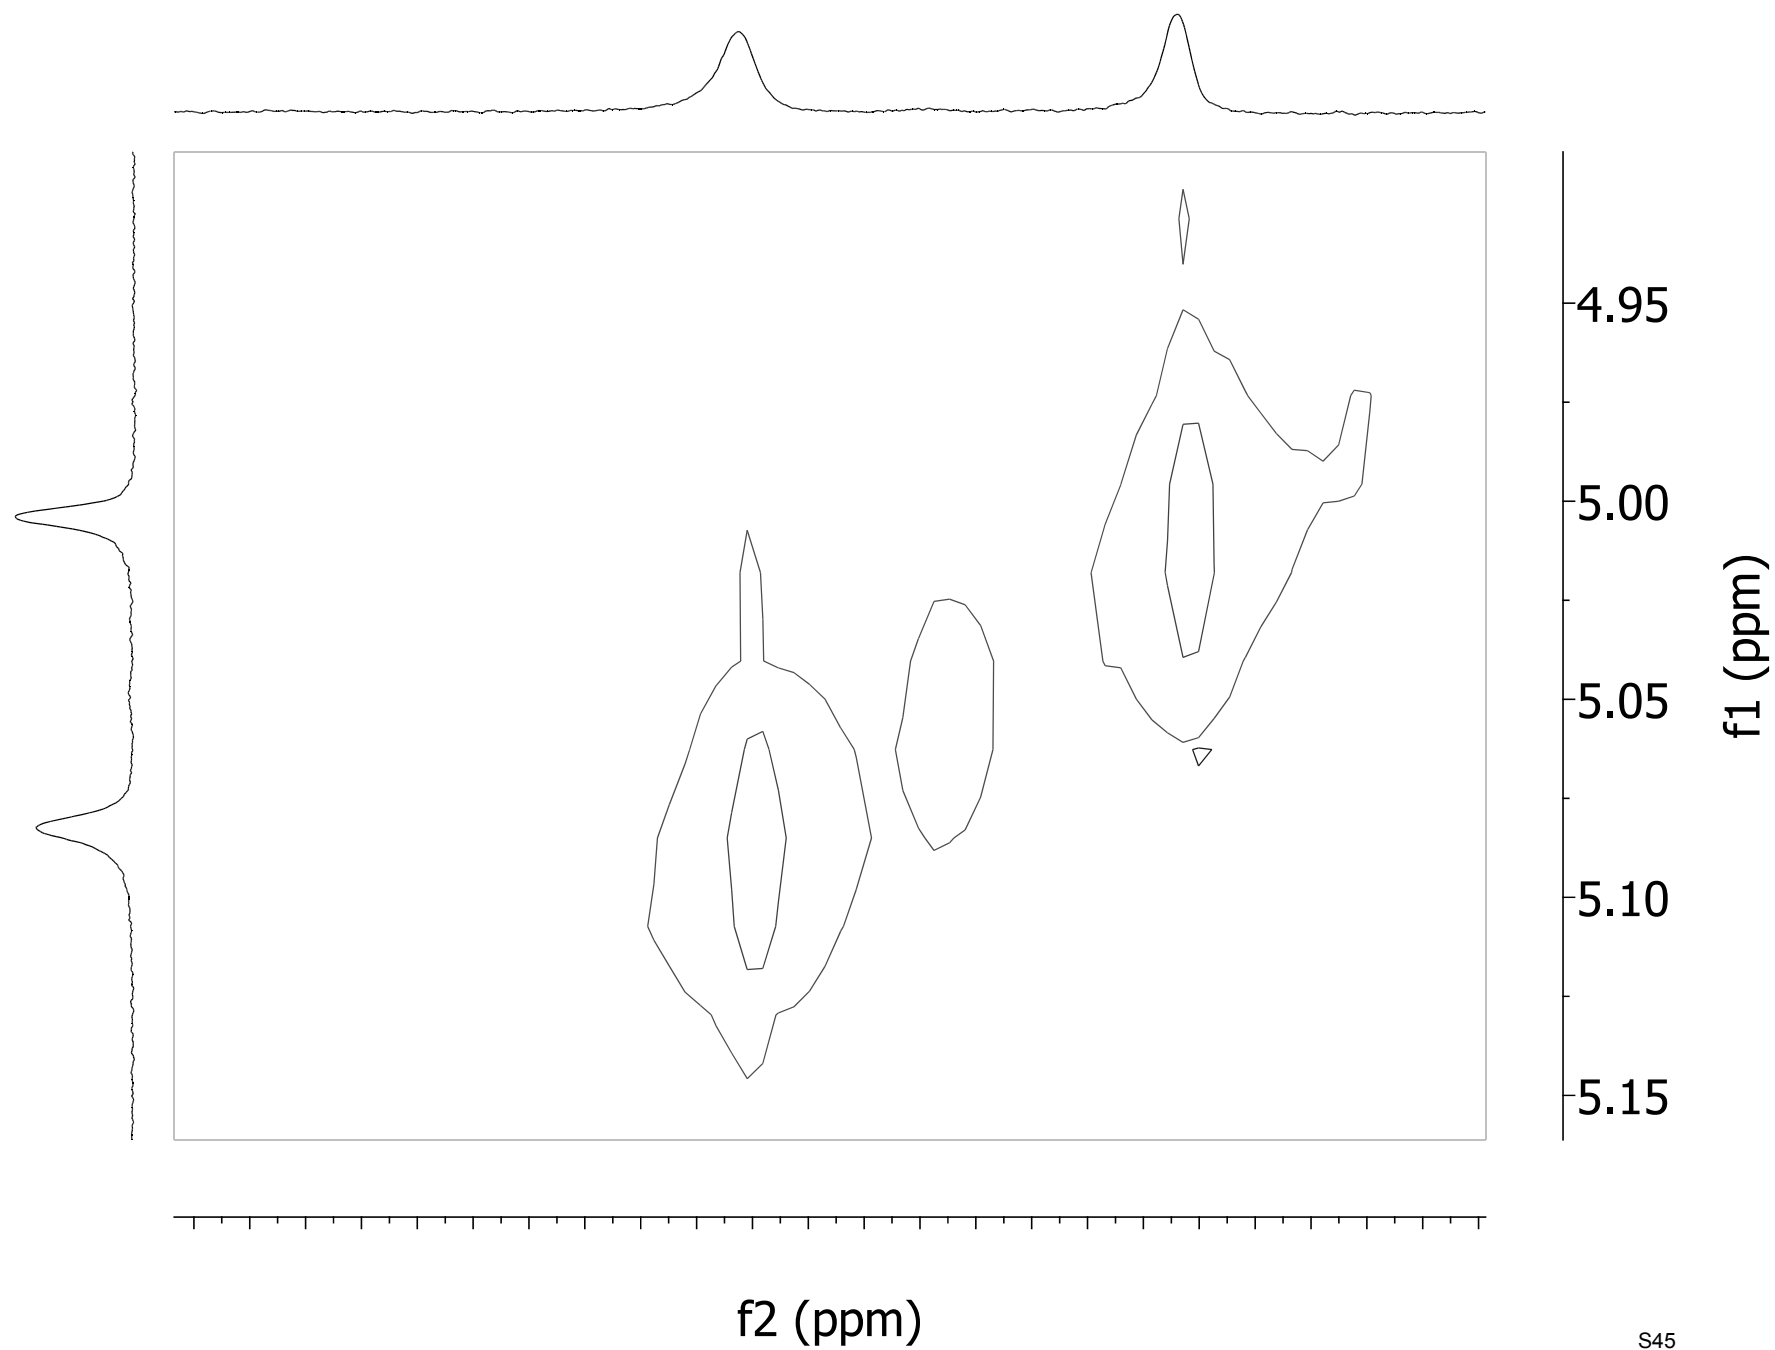

Figure S36. Expansion of NOESY Spectrum at 500 MHz in DMSO-d<sub>6</sub> of Dictazole B (2)

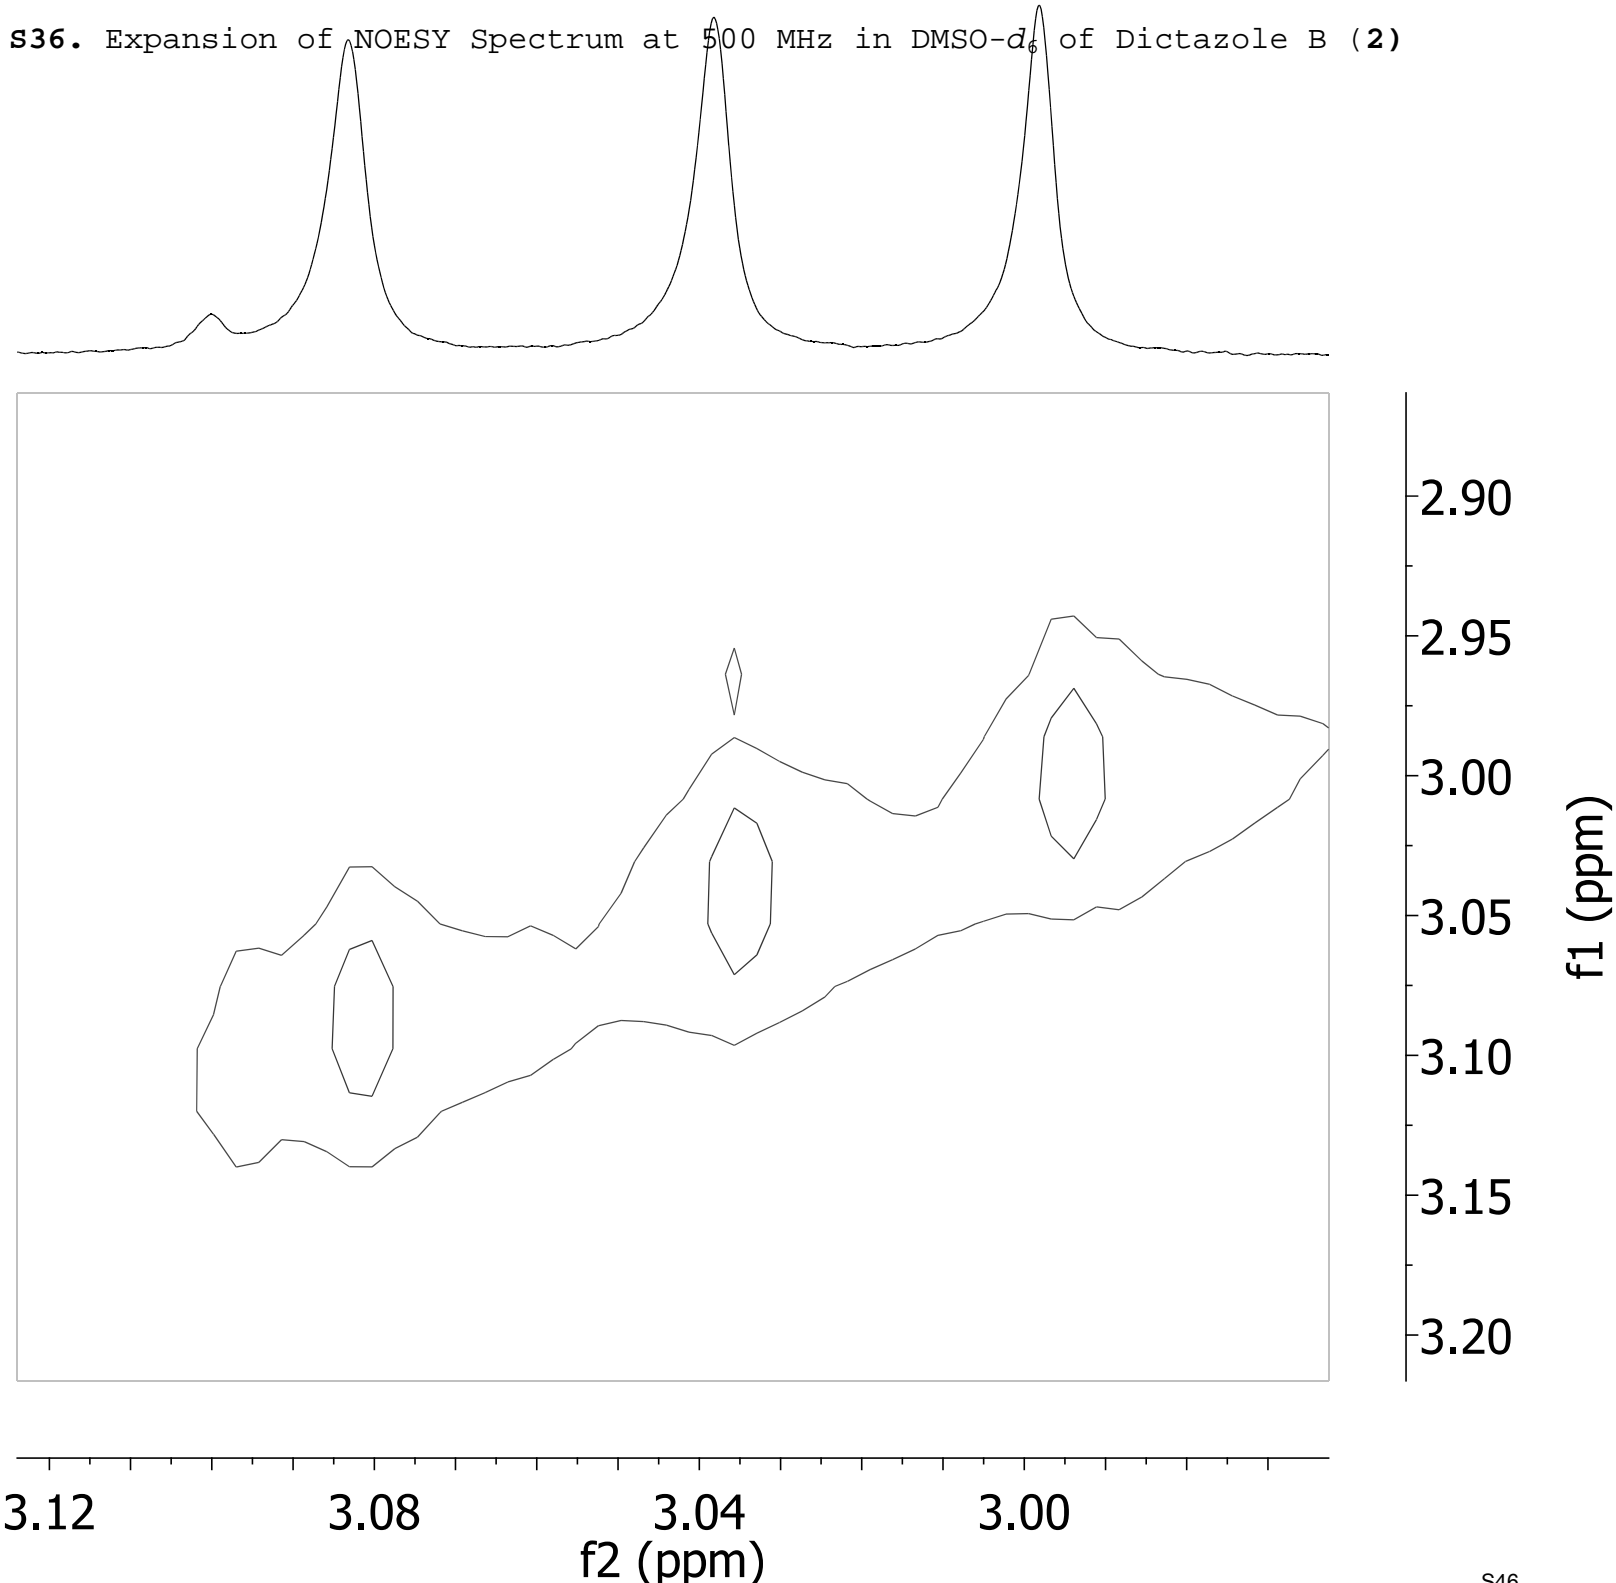

**Figure S37.** DPGSE 1D NOE NMR Spectrum at 500 MHz in DMSO-*d*<sub>6</sub> of Dictazole B (**2**)  
excitation of H-8

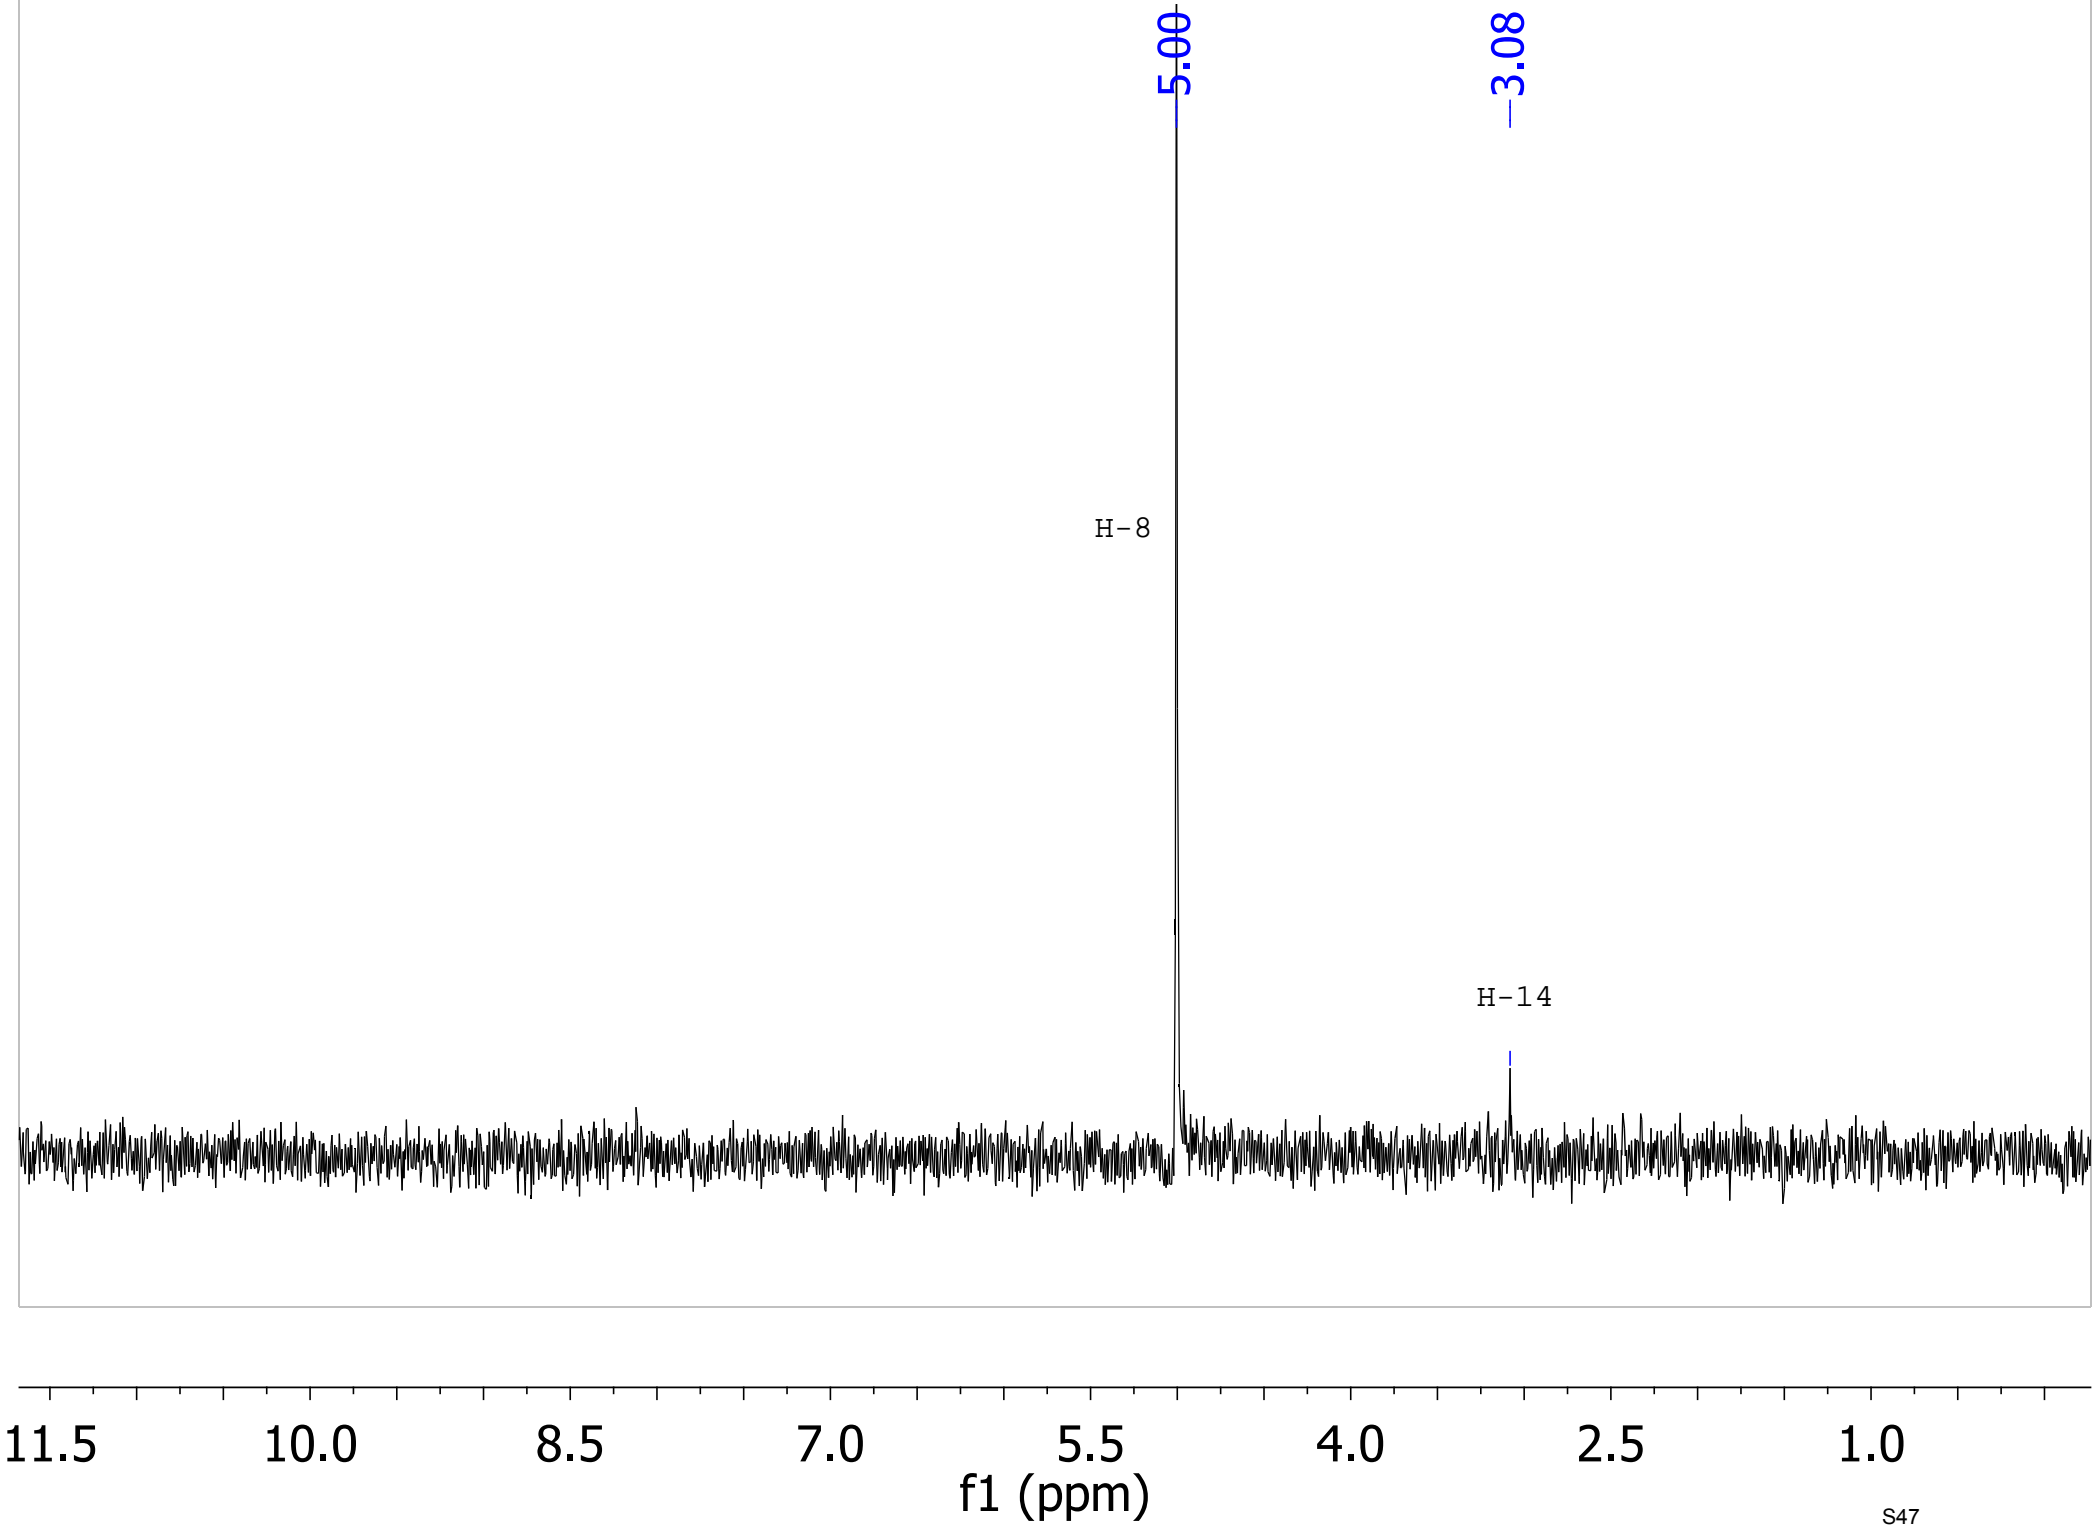

**Figure S38.** DPGSE 1D NOE NMR Spectrum at 500 MHz in DMSO- $d_6$  of Dictazole B (**2**)  
excitation of H-8'

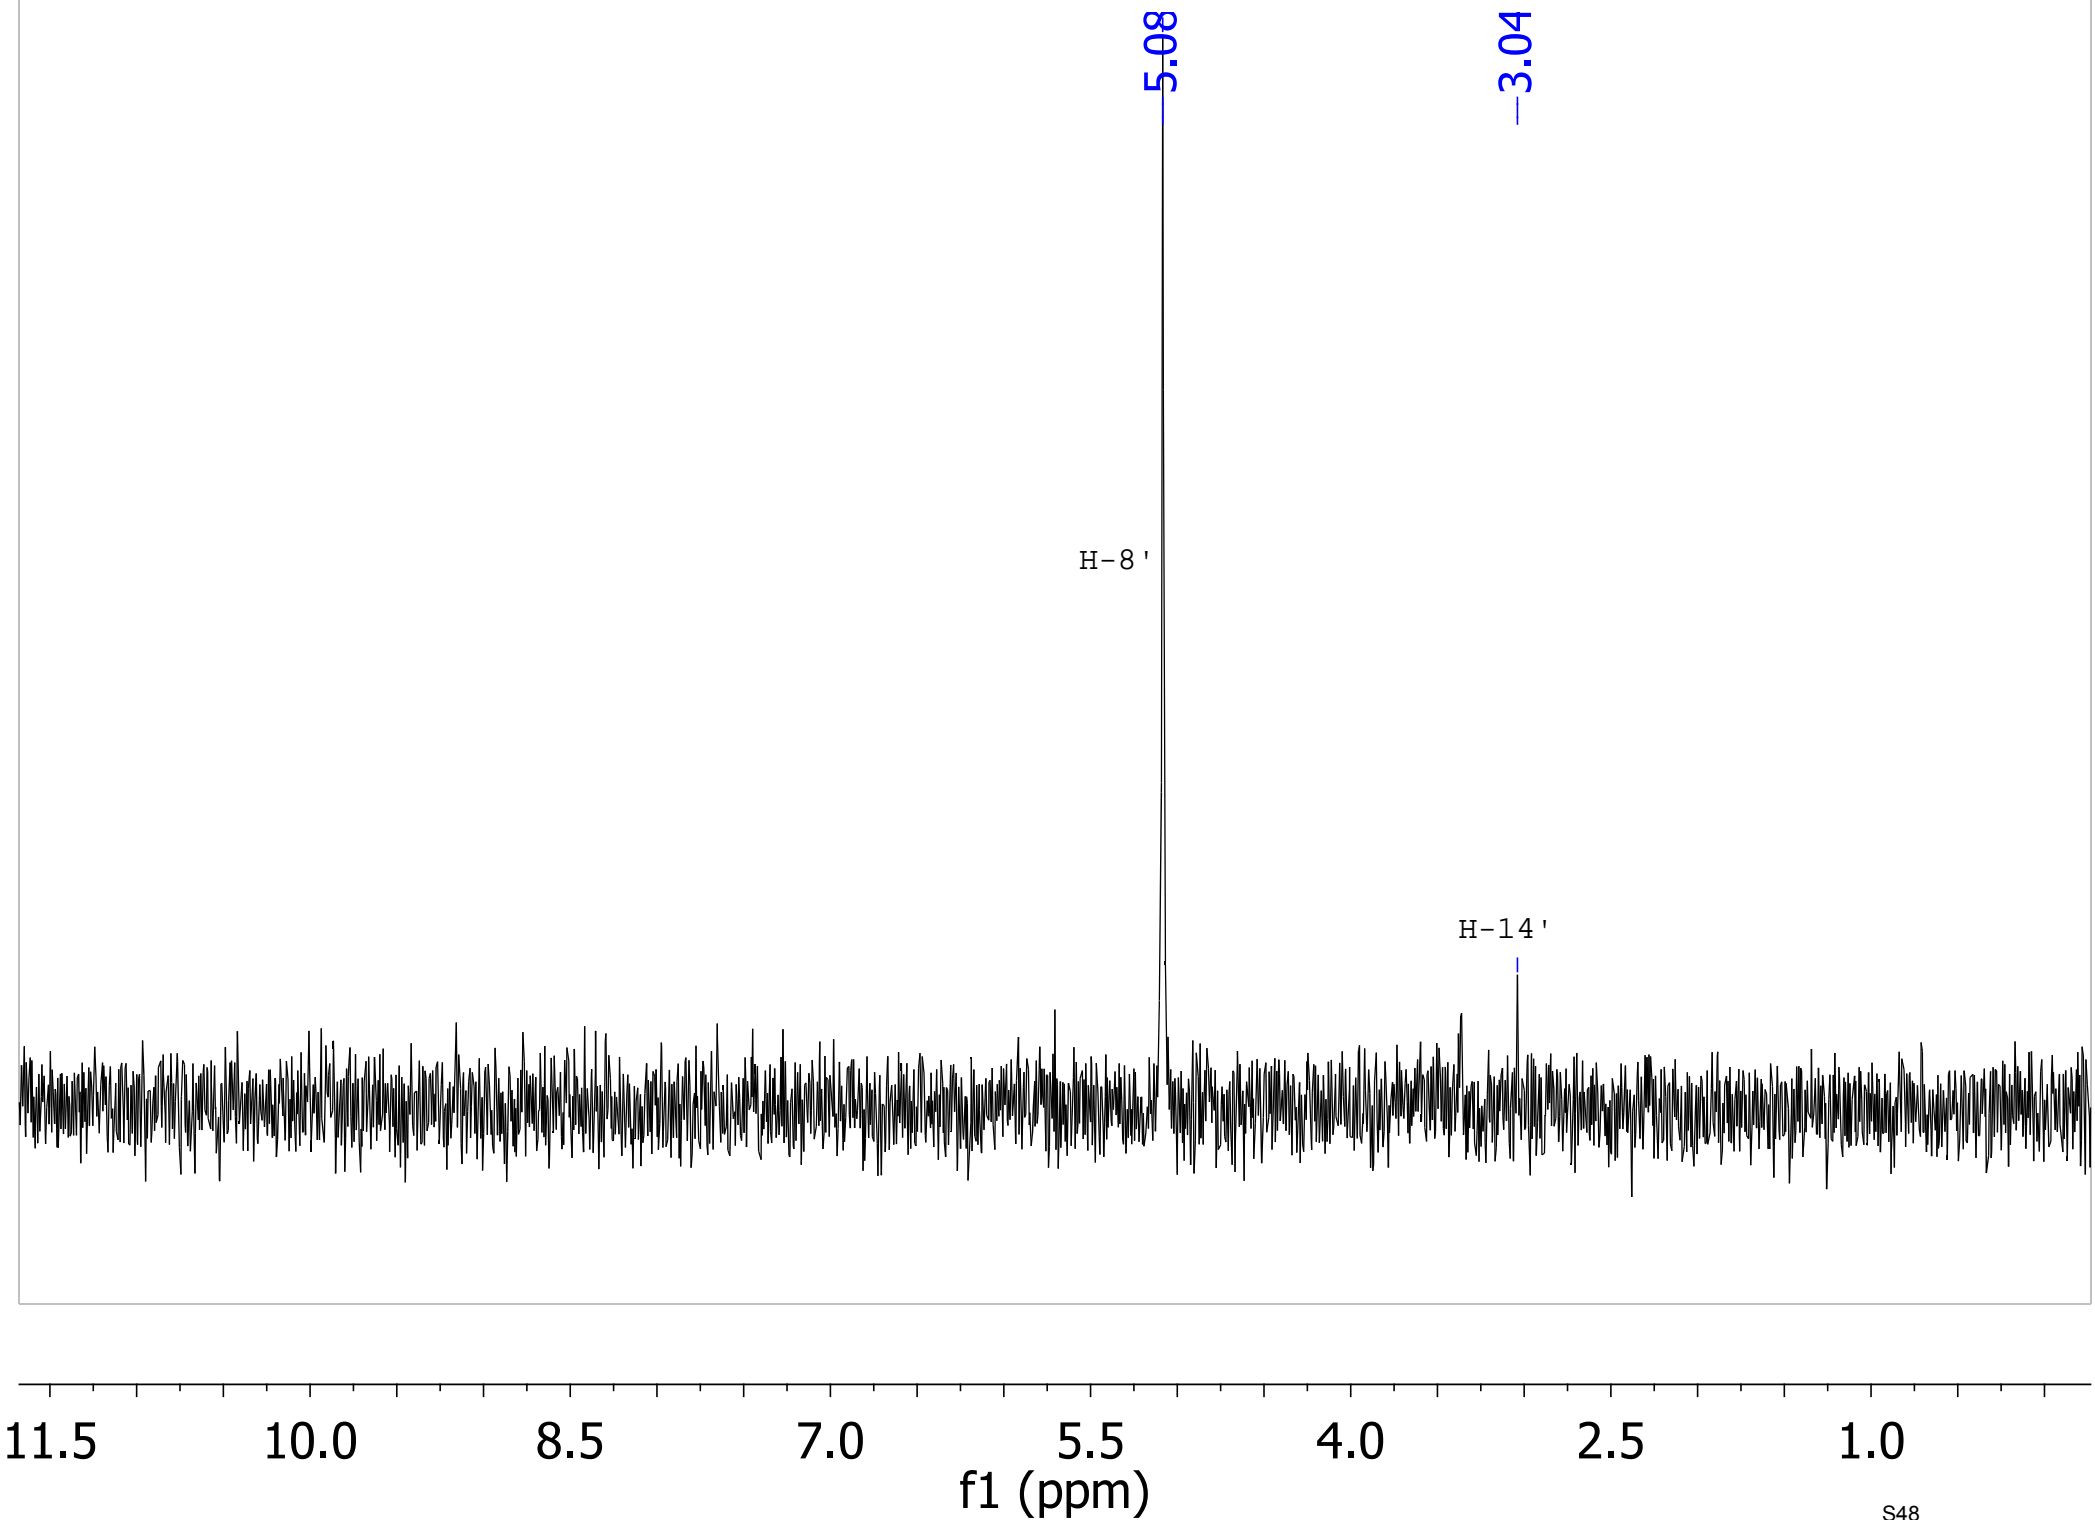



Figure S39.  $^1\text{H}$  NMR Spectrum at 500 MHz in  $\text{MeOH-}d_4$  of Dictazoline C (5) with water suppression

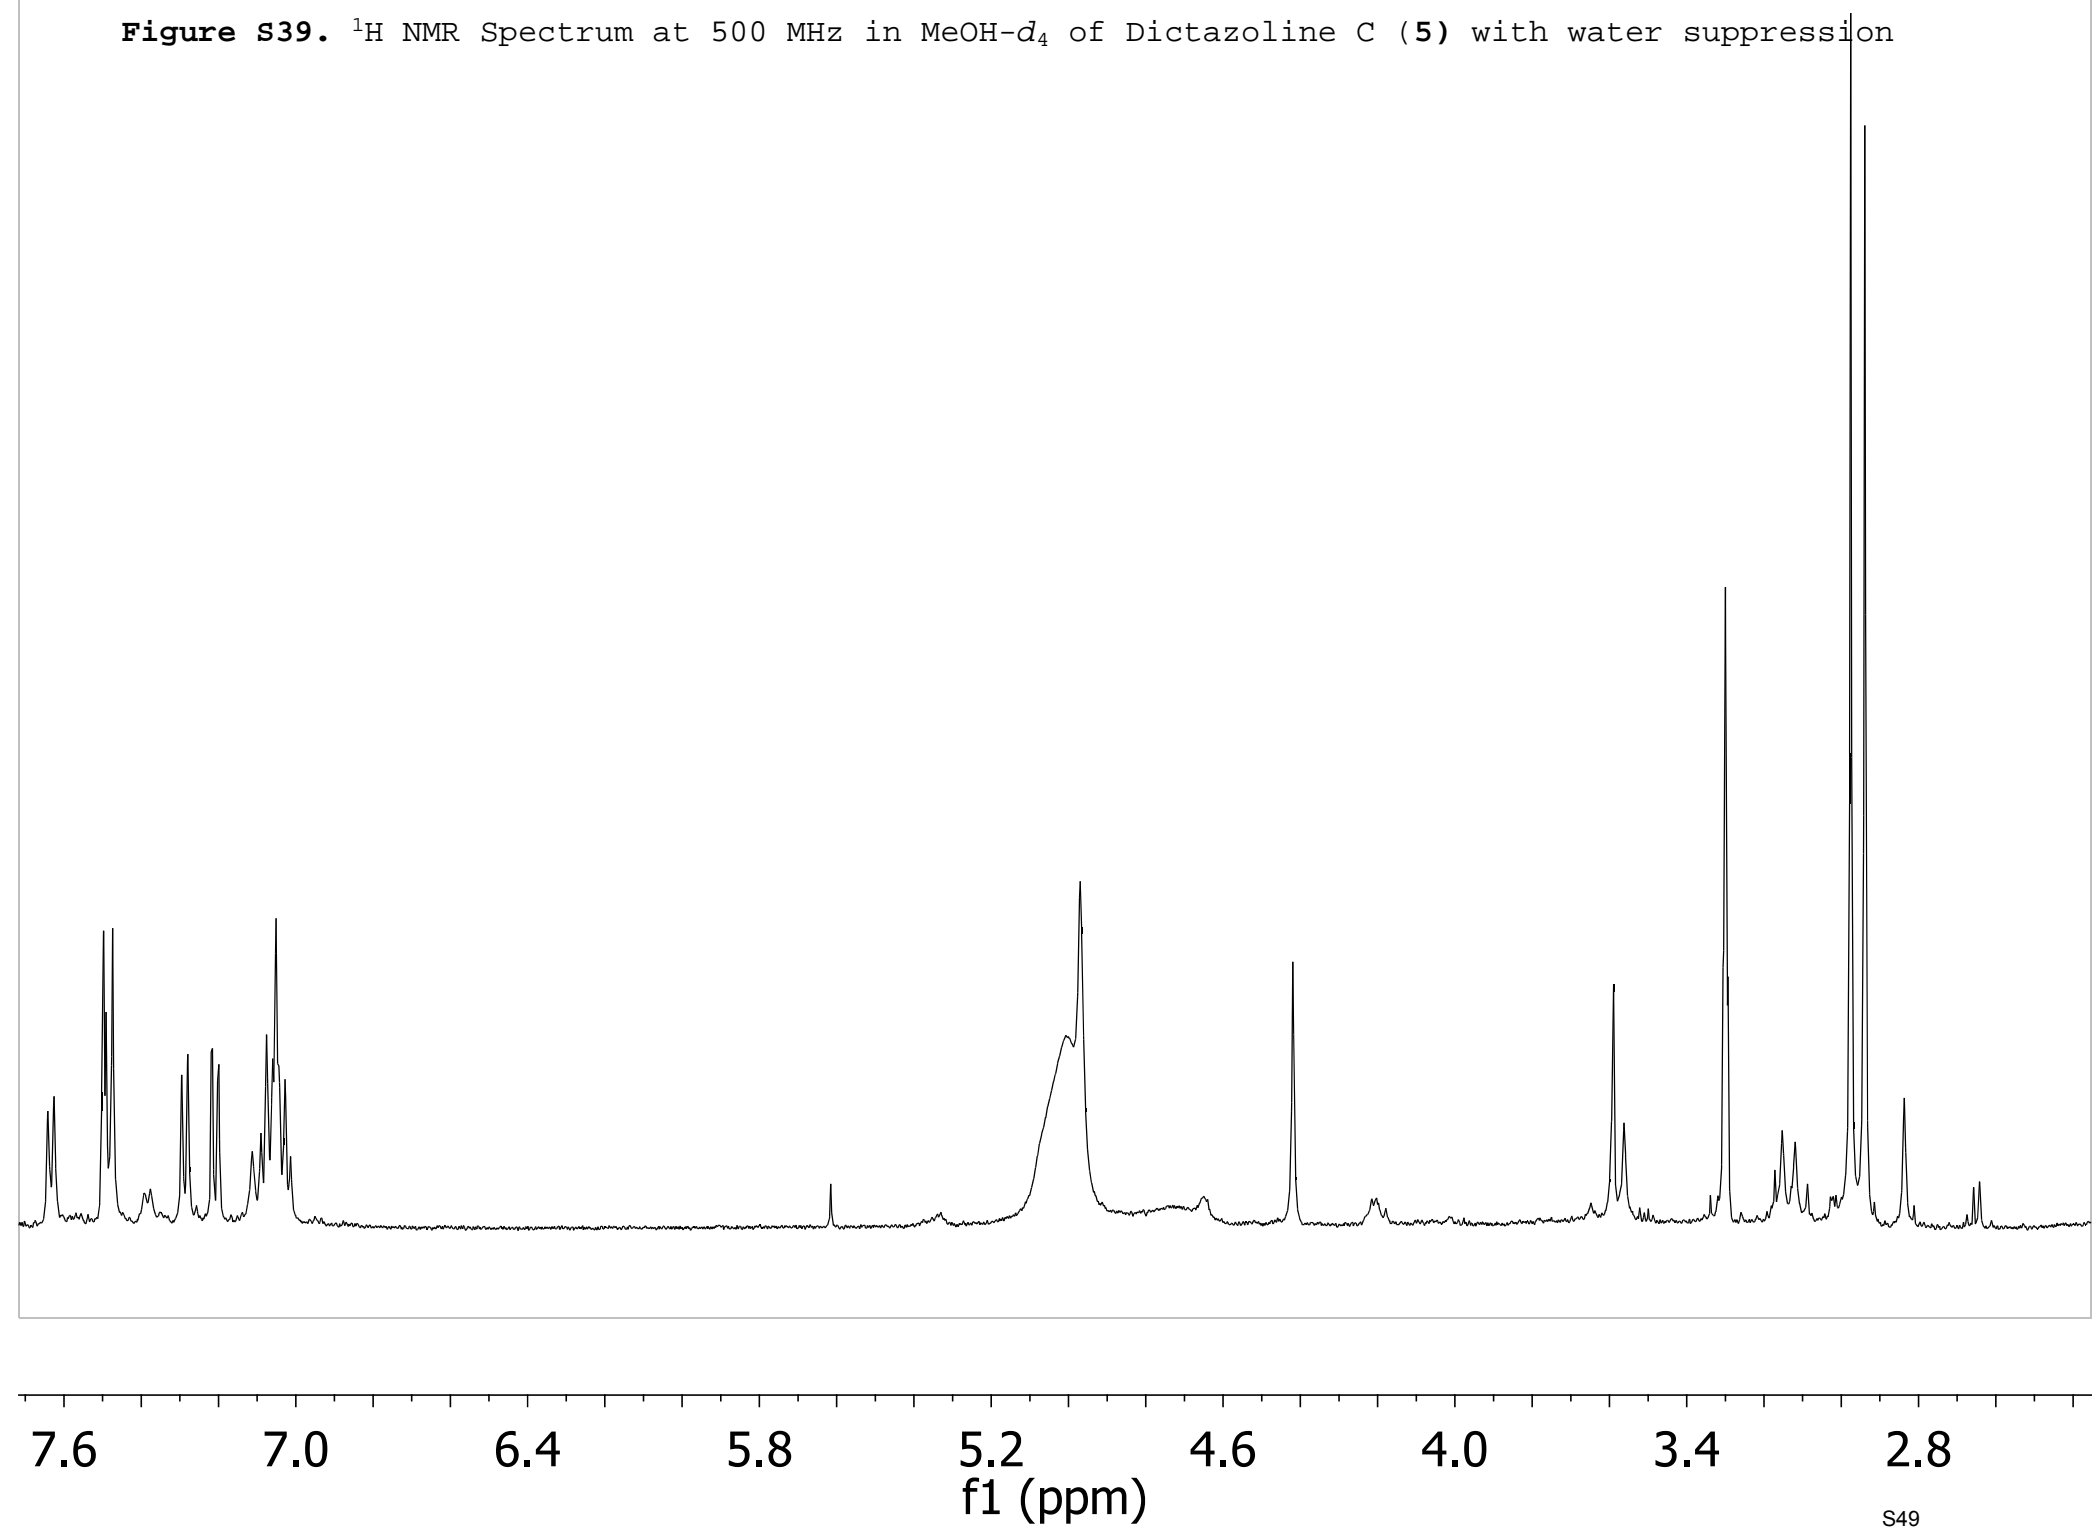

Figure S40.  $^{13}\text{C}$  NMR Spectrum at 125 MHz in  $\text{MeOH-}d_4$  of Dictazoline C (5)

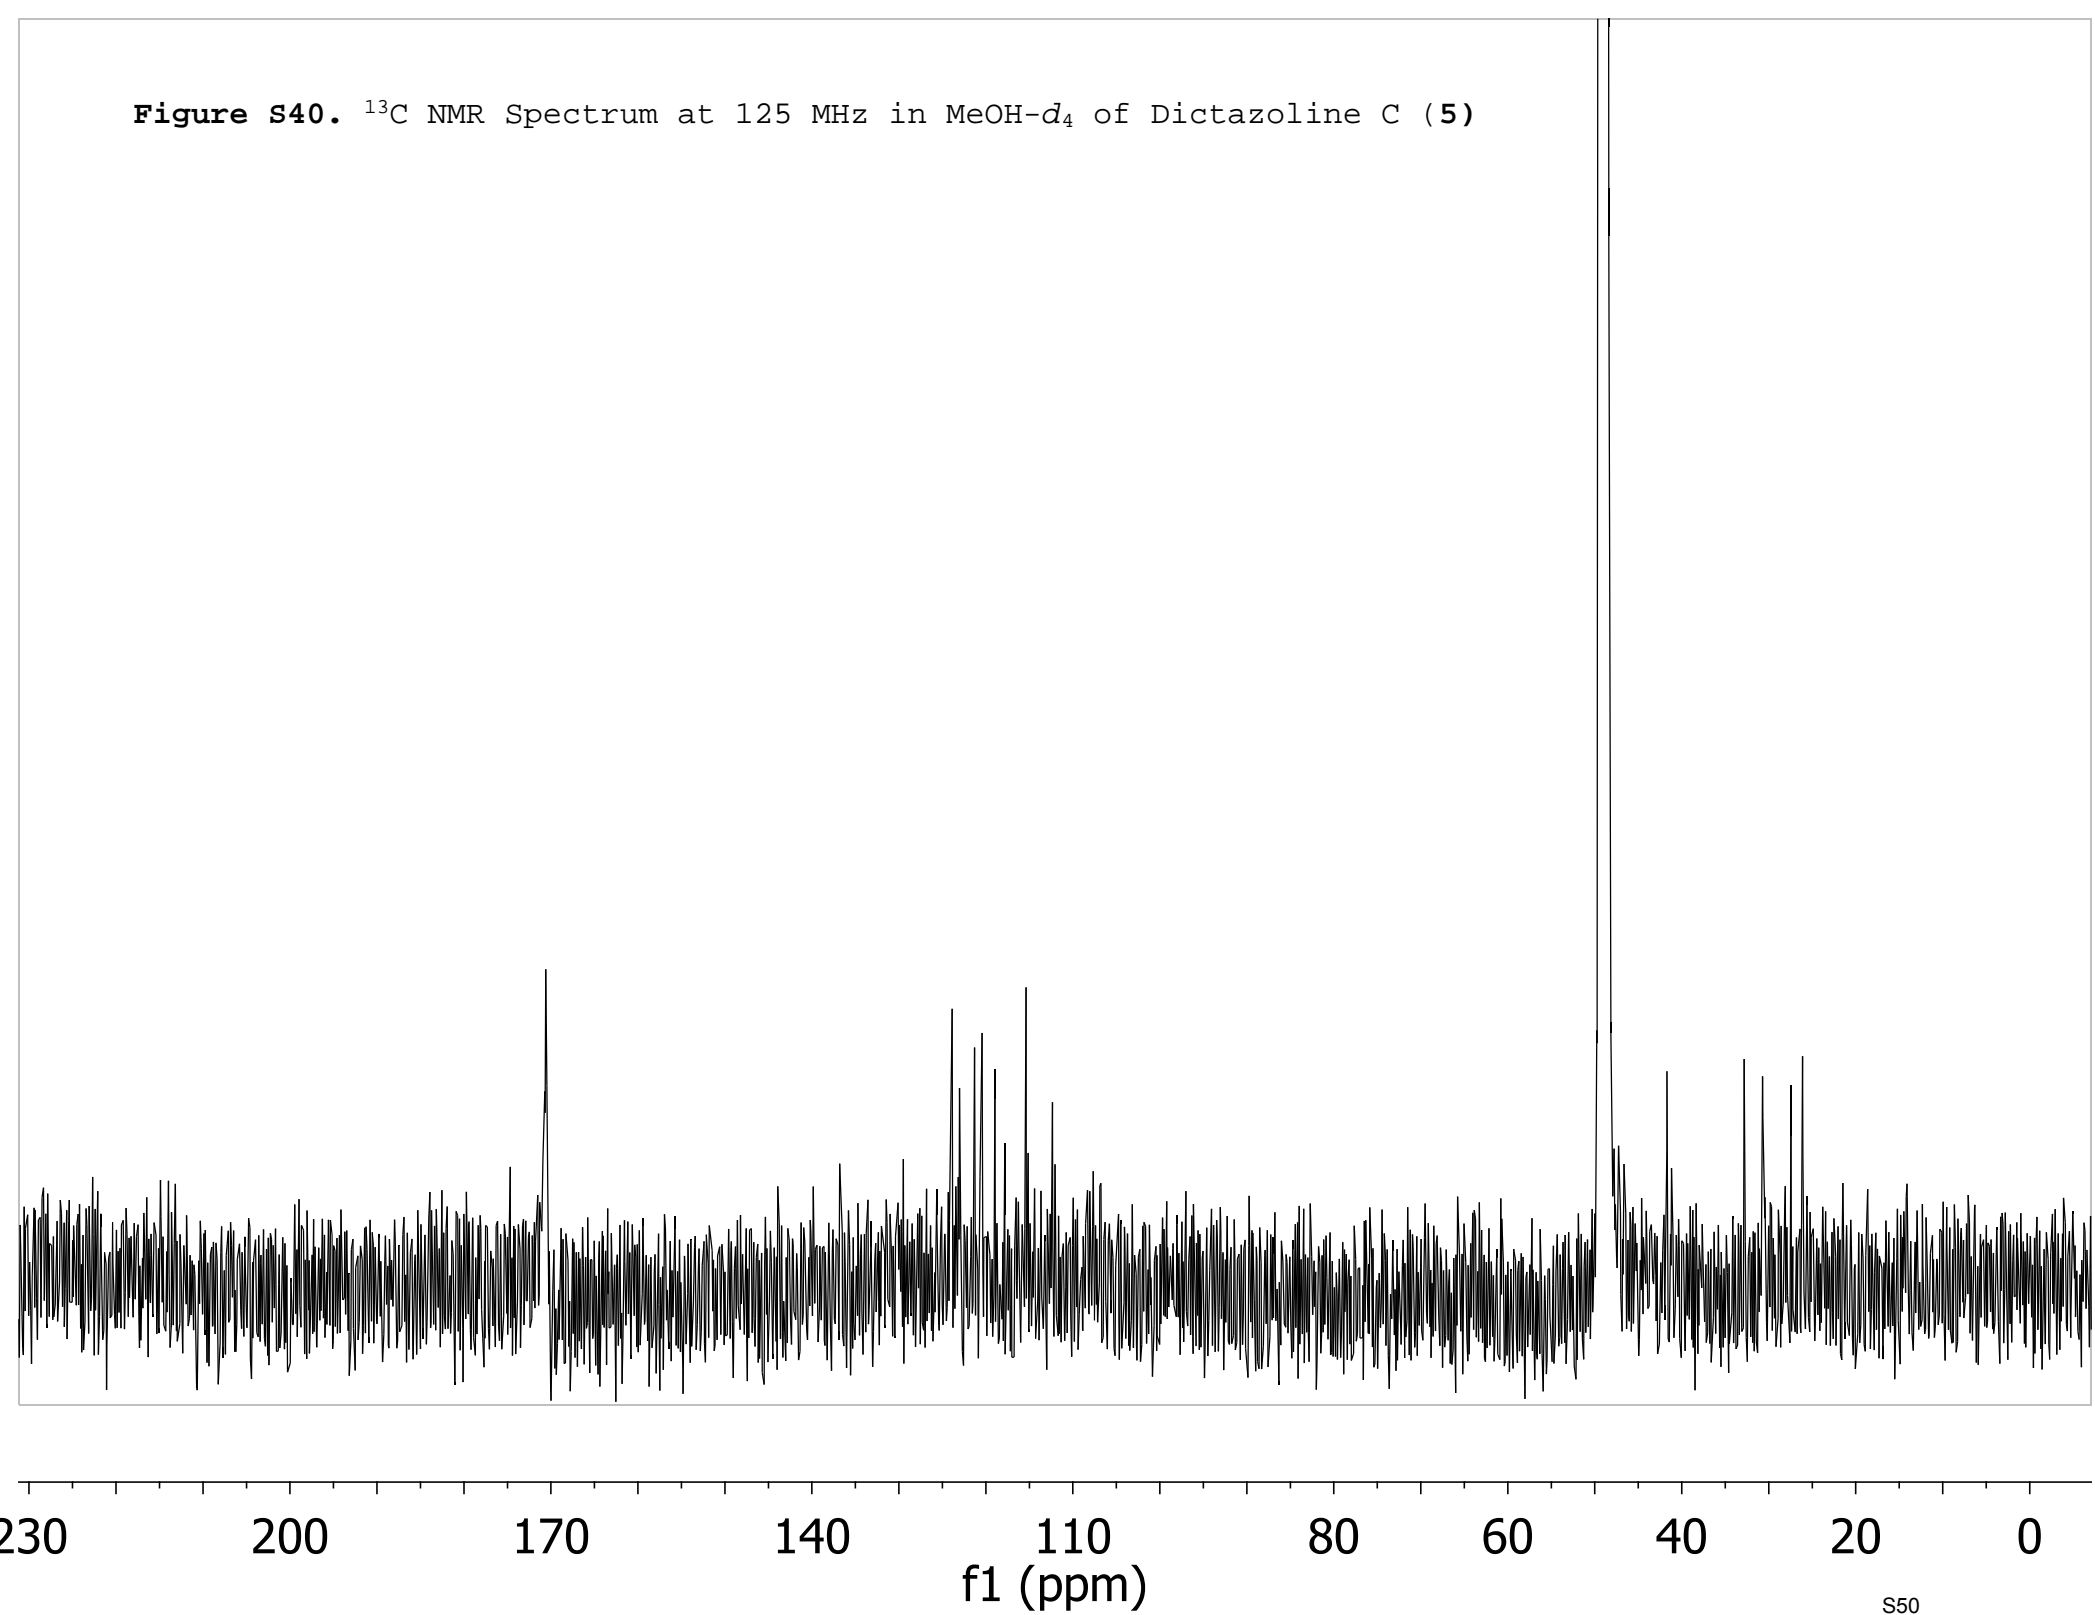

Figure S41. HSQC NMR Spectrum at 500 MHz in MeOH- $d_4$  of Dictazoline C (5)

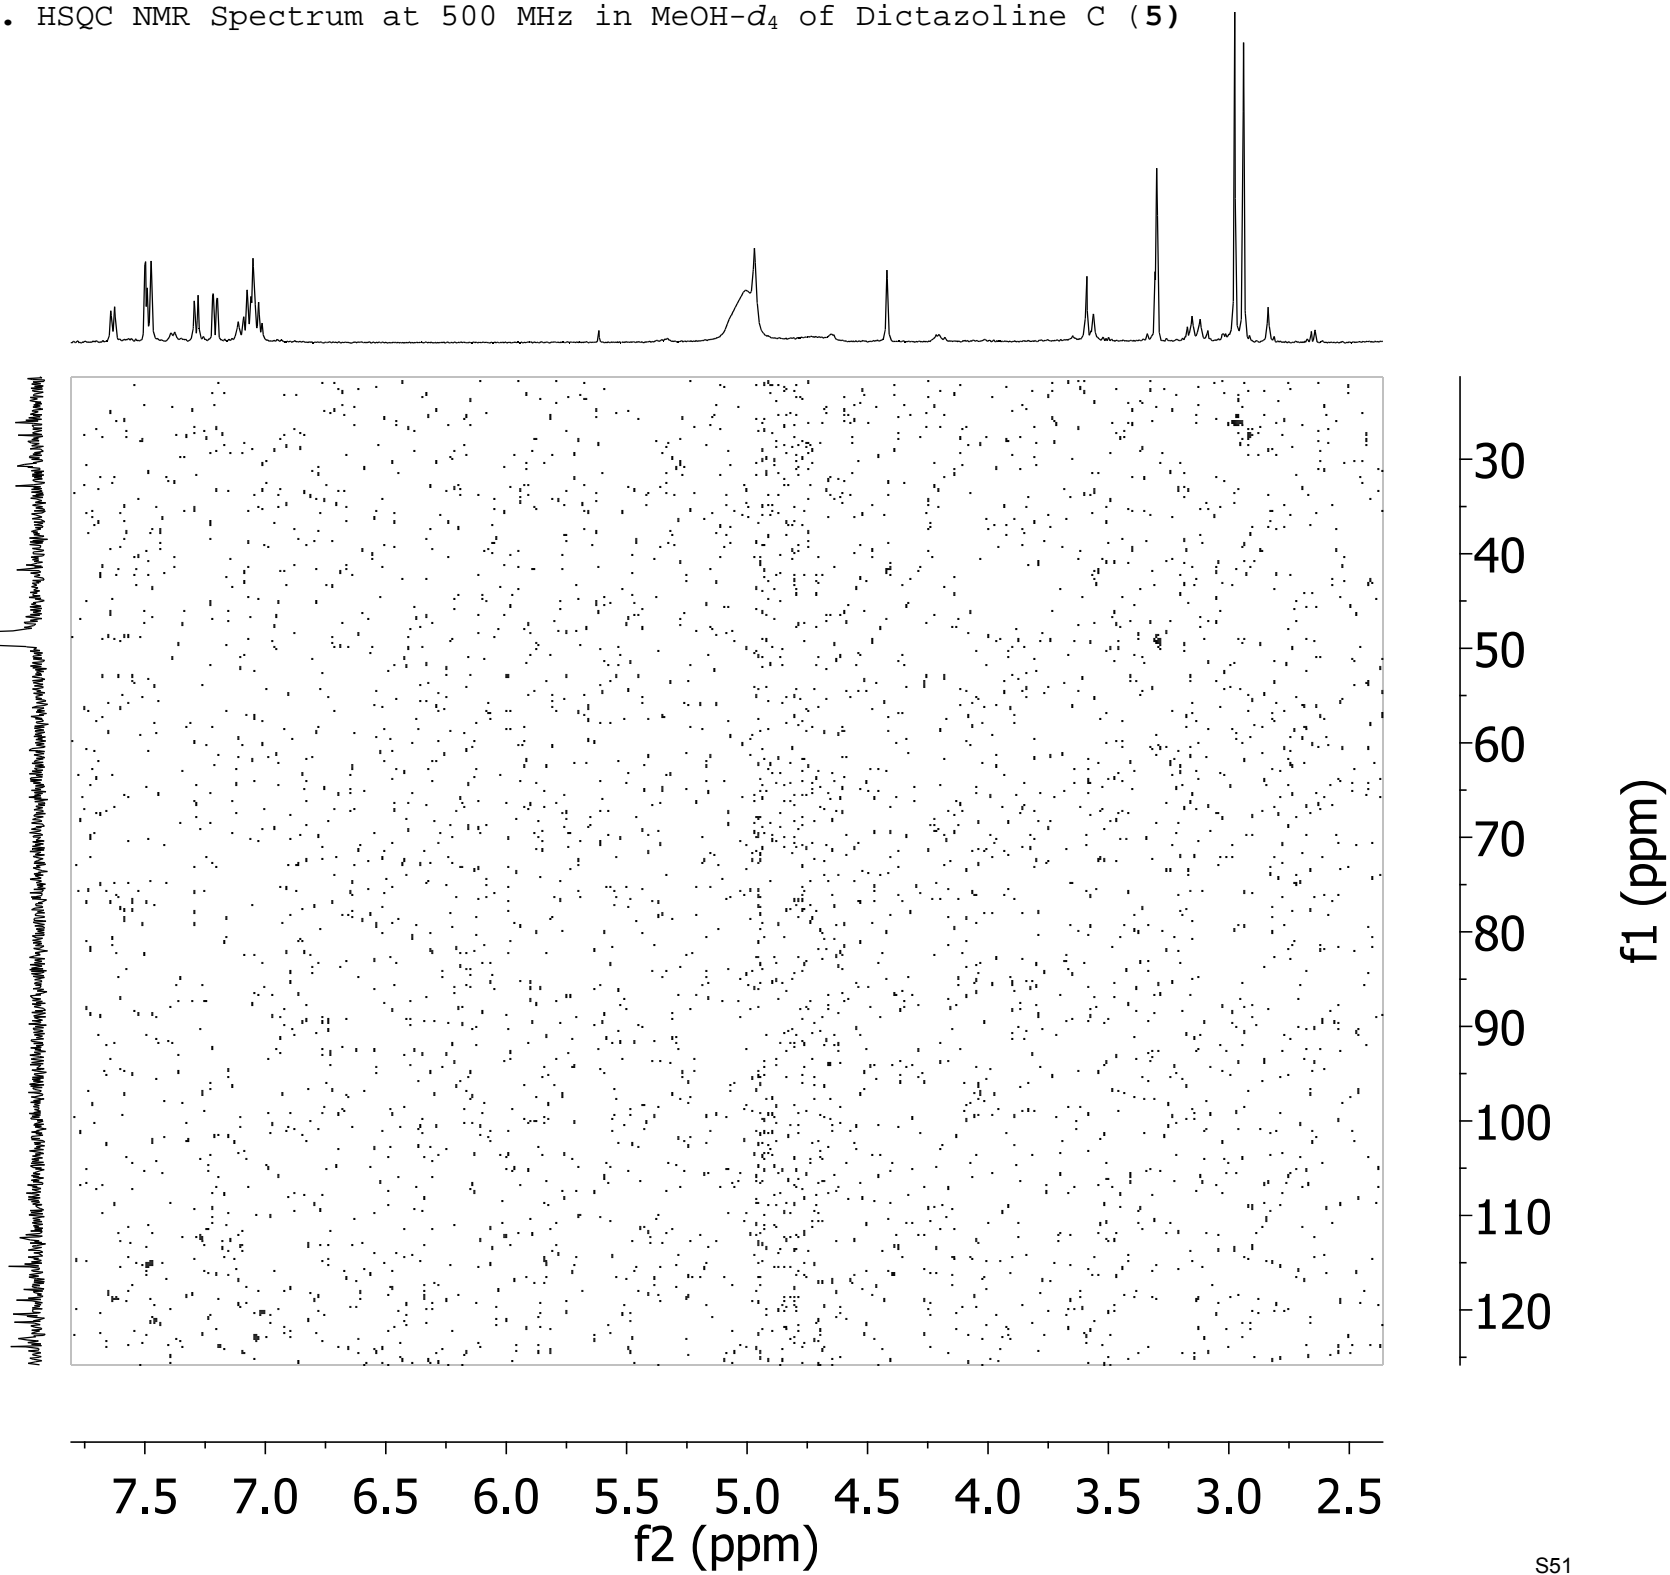

Figure S42. Expansion of HSQC NMR Spectrum at 500 MHz in MeOH- $d_4$  of Dictazoline C (5)

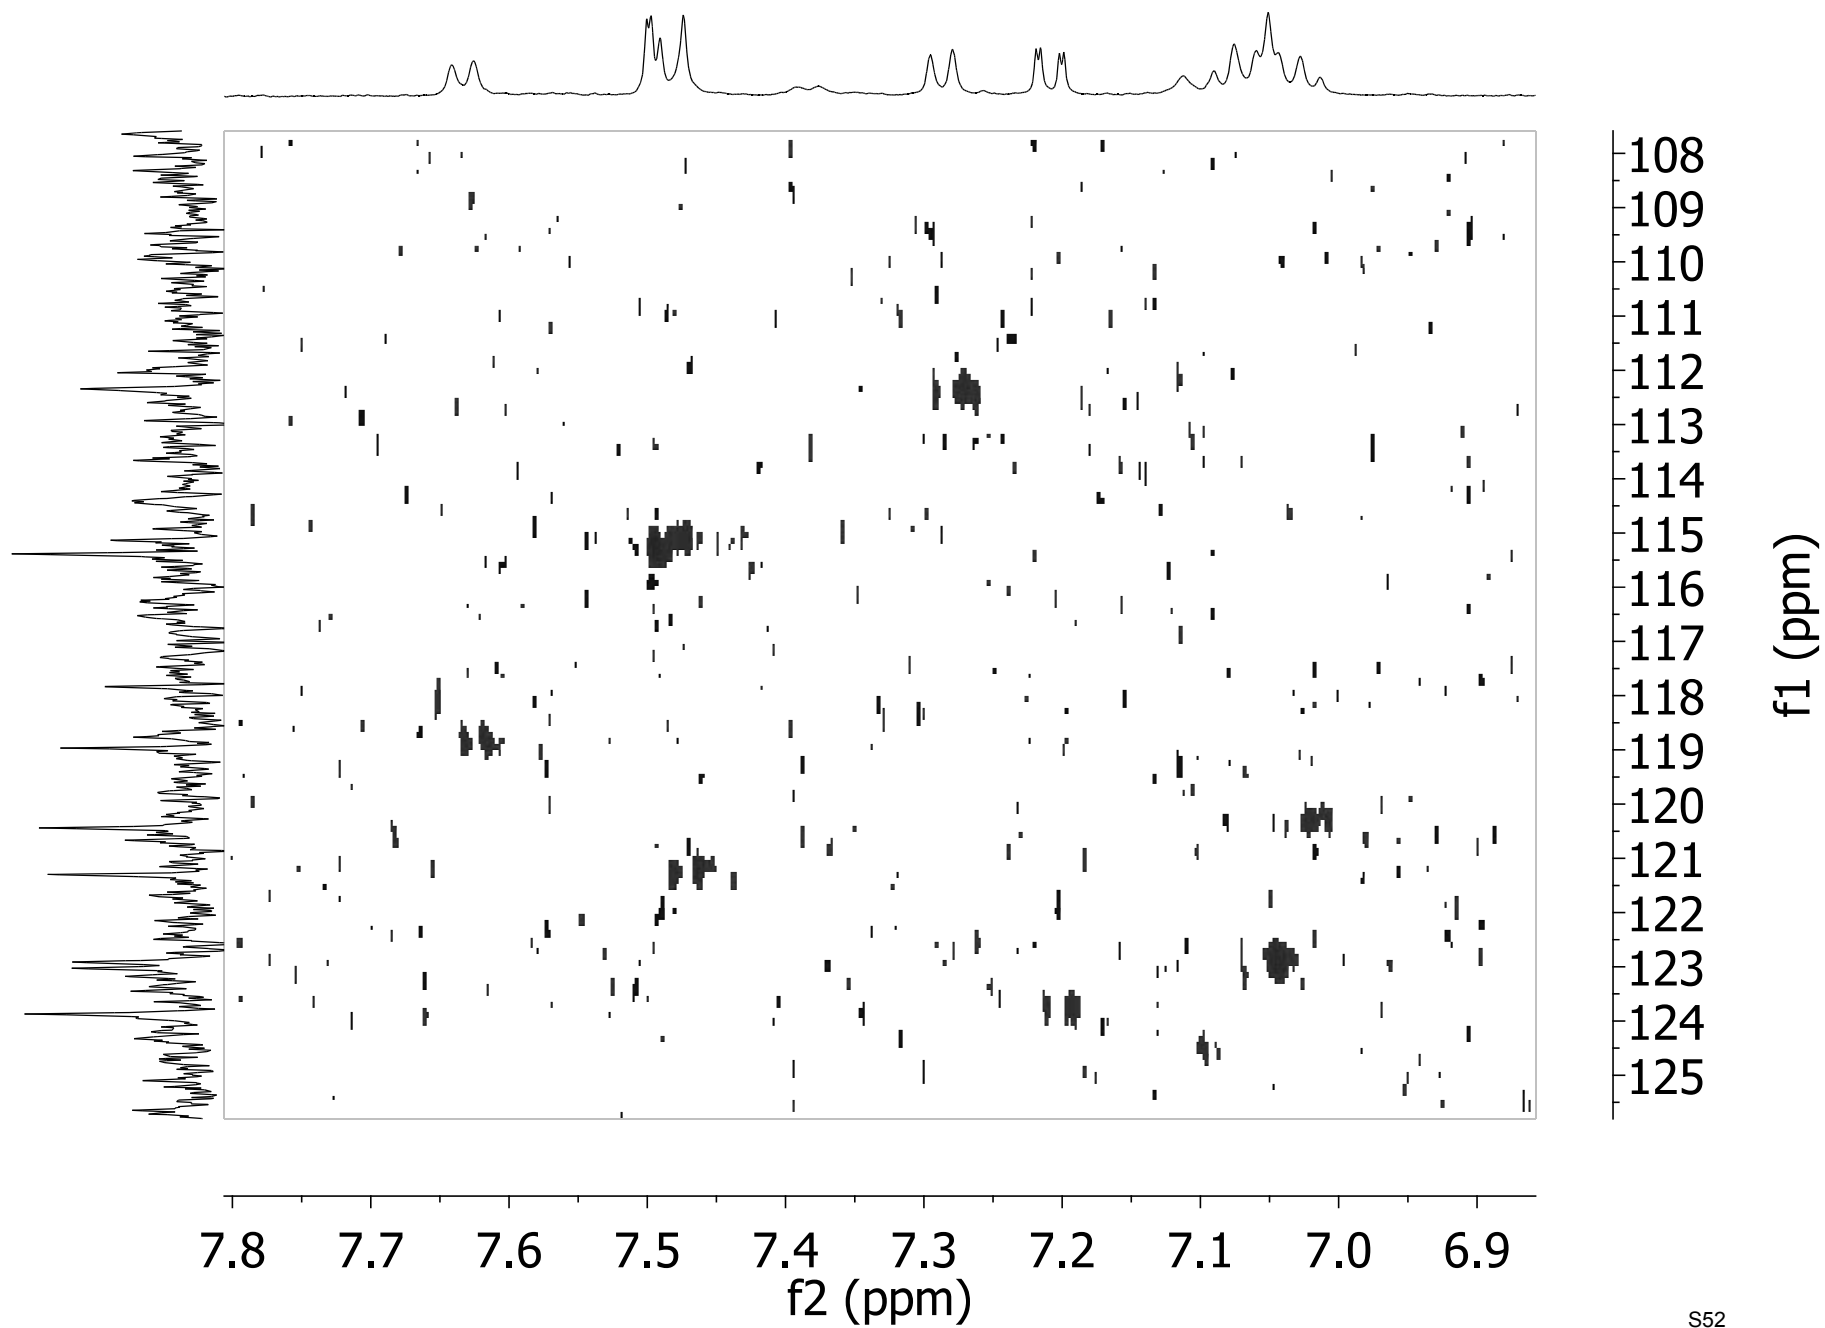

Figure S43. Expansion of HSQC NMR Spectrum at 500 MHz in MeOH-d<sub>4</sub> of Dictazoline C (5)

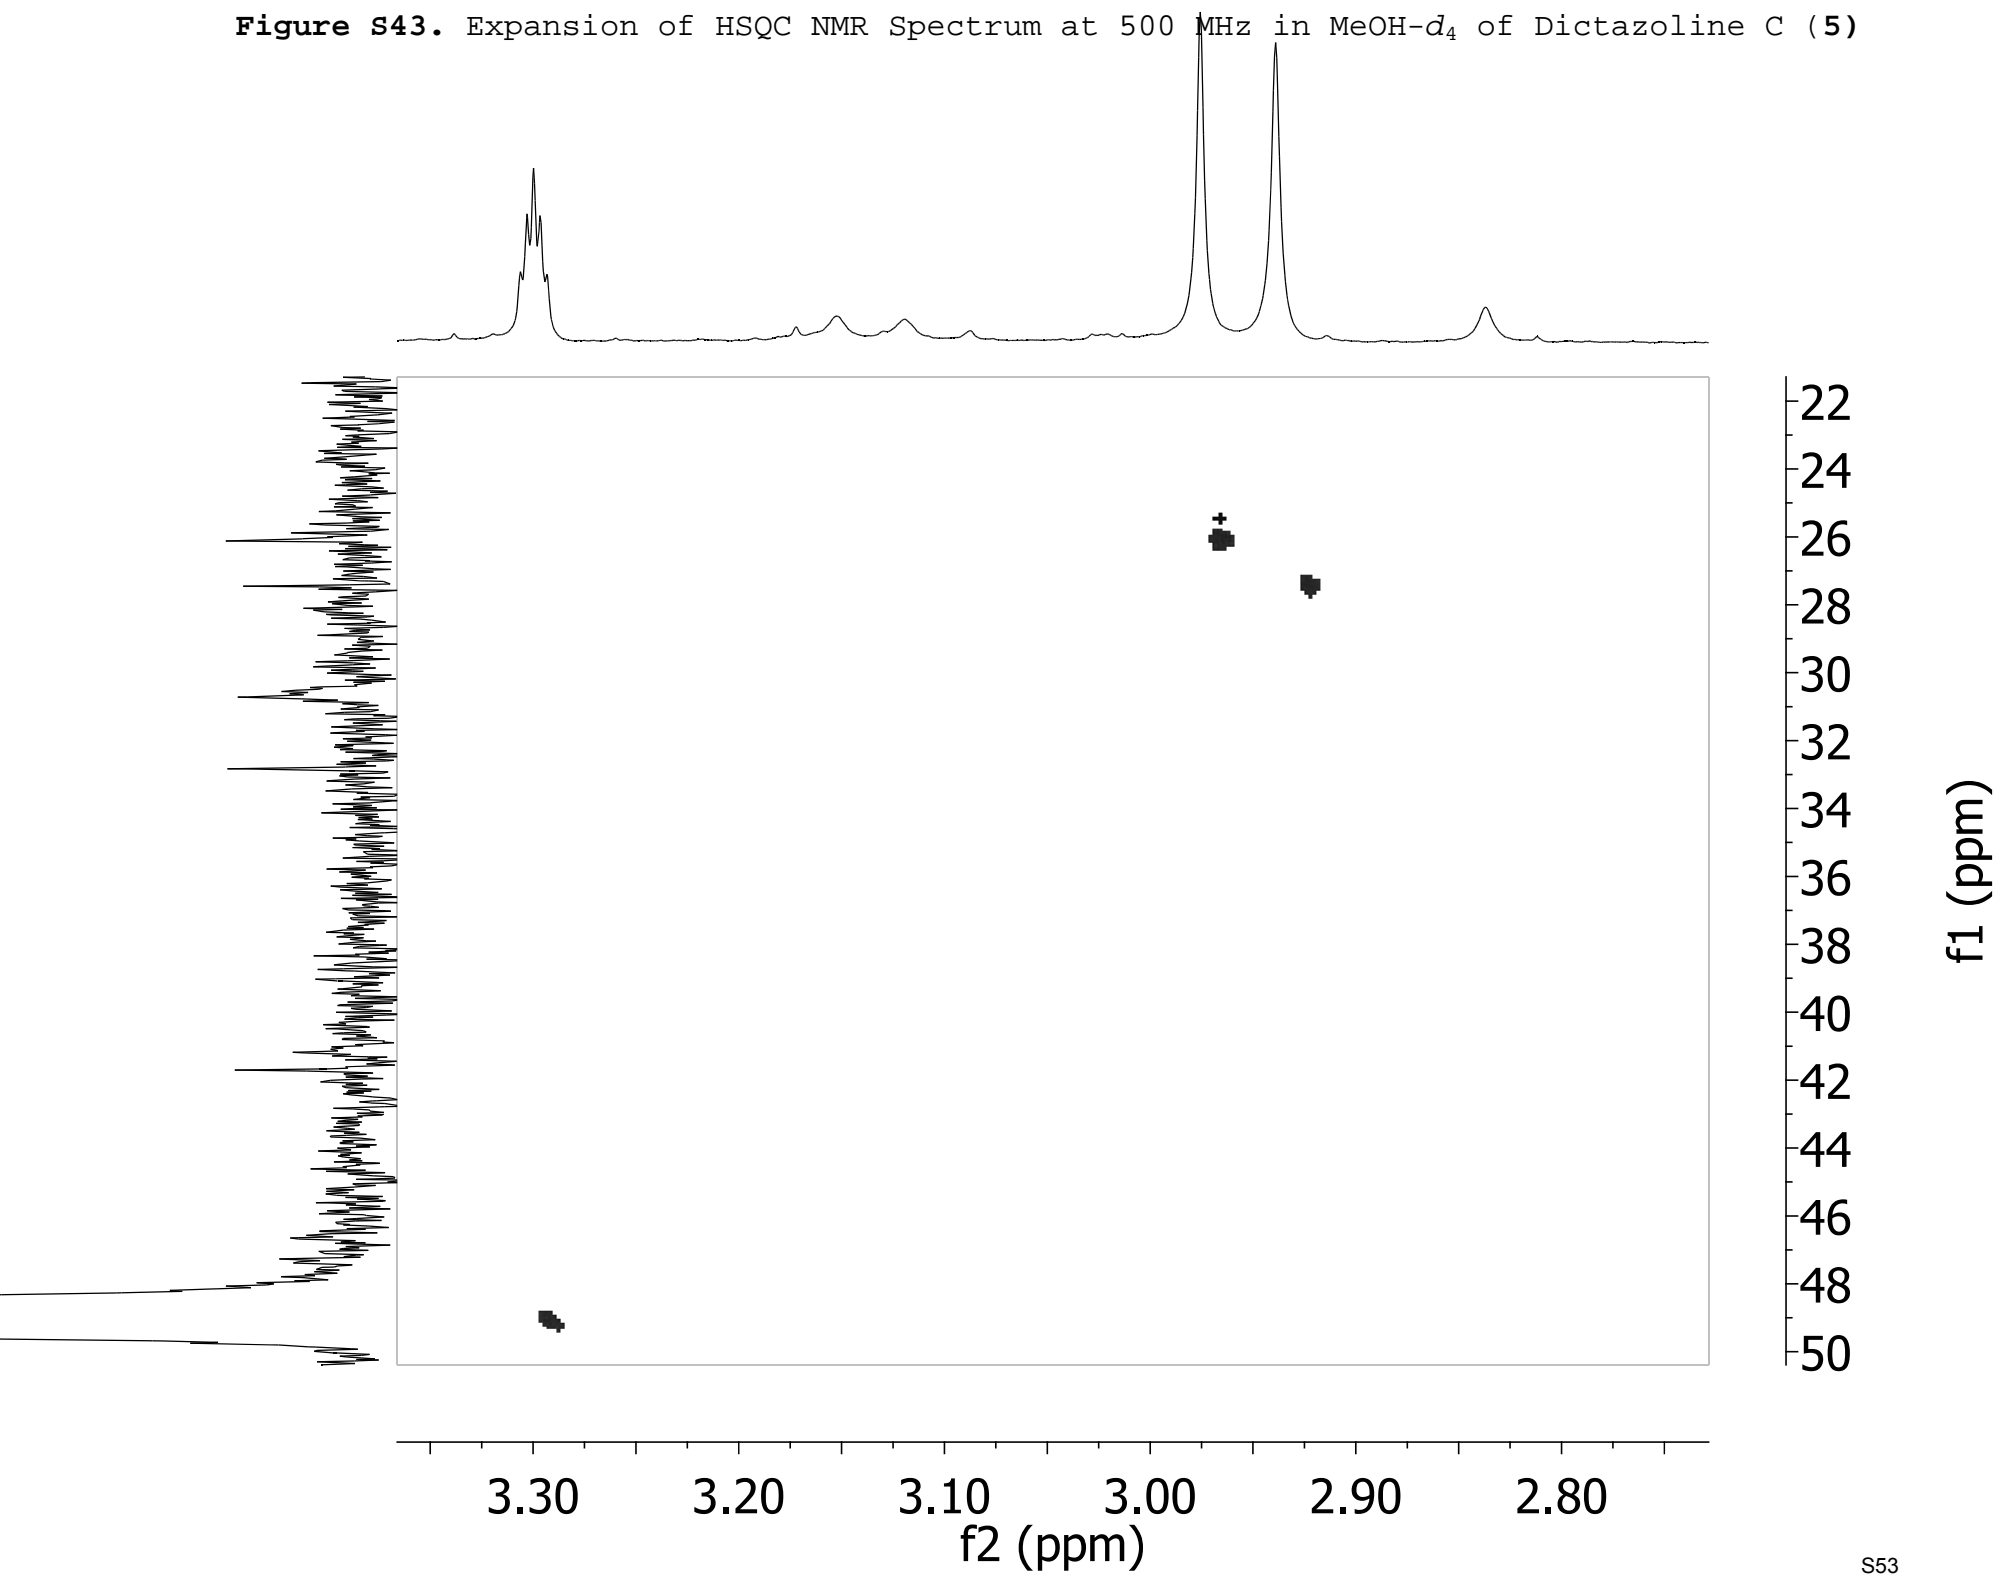

Figure S44. COSY NMR Spectrum at 500 MHz in MeOH-d<sub>4</sub> of Dictazoline C (5)

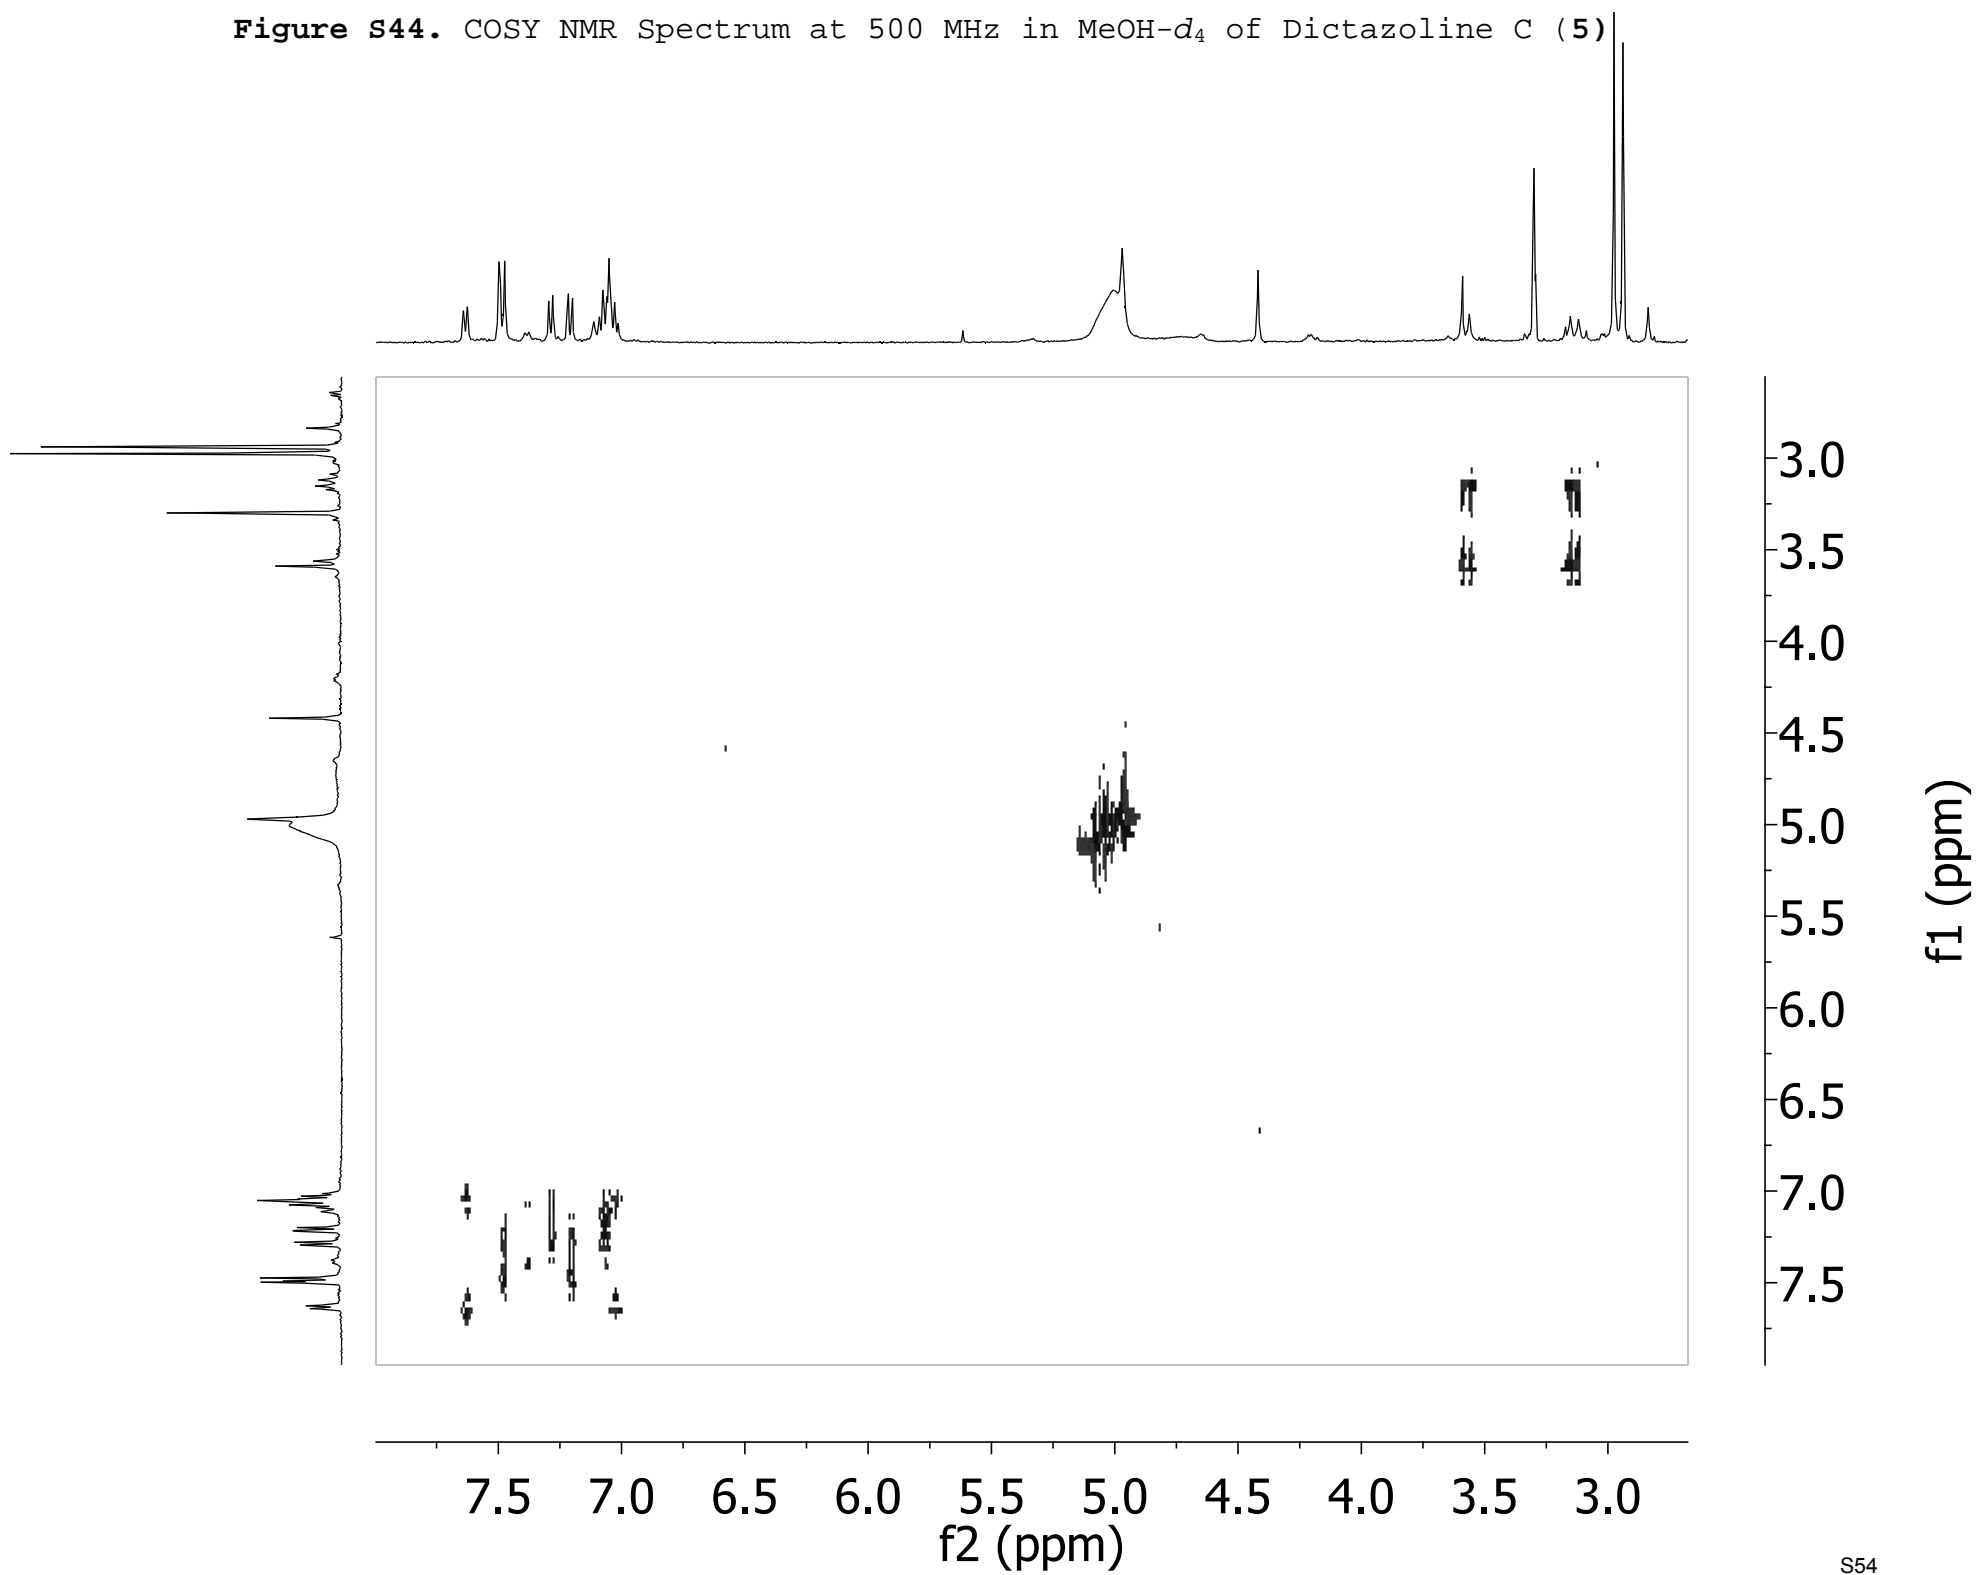

Figure S45. HMBC NMR Spectrum at 500 MHz in MeOH- $d_4$  of Dictazoline C (5)

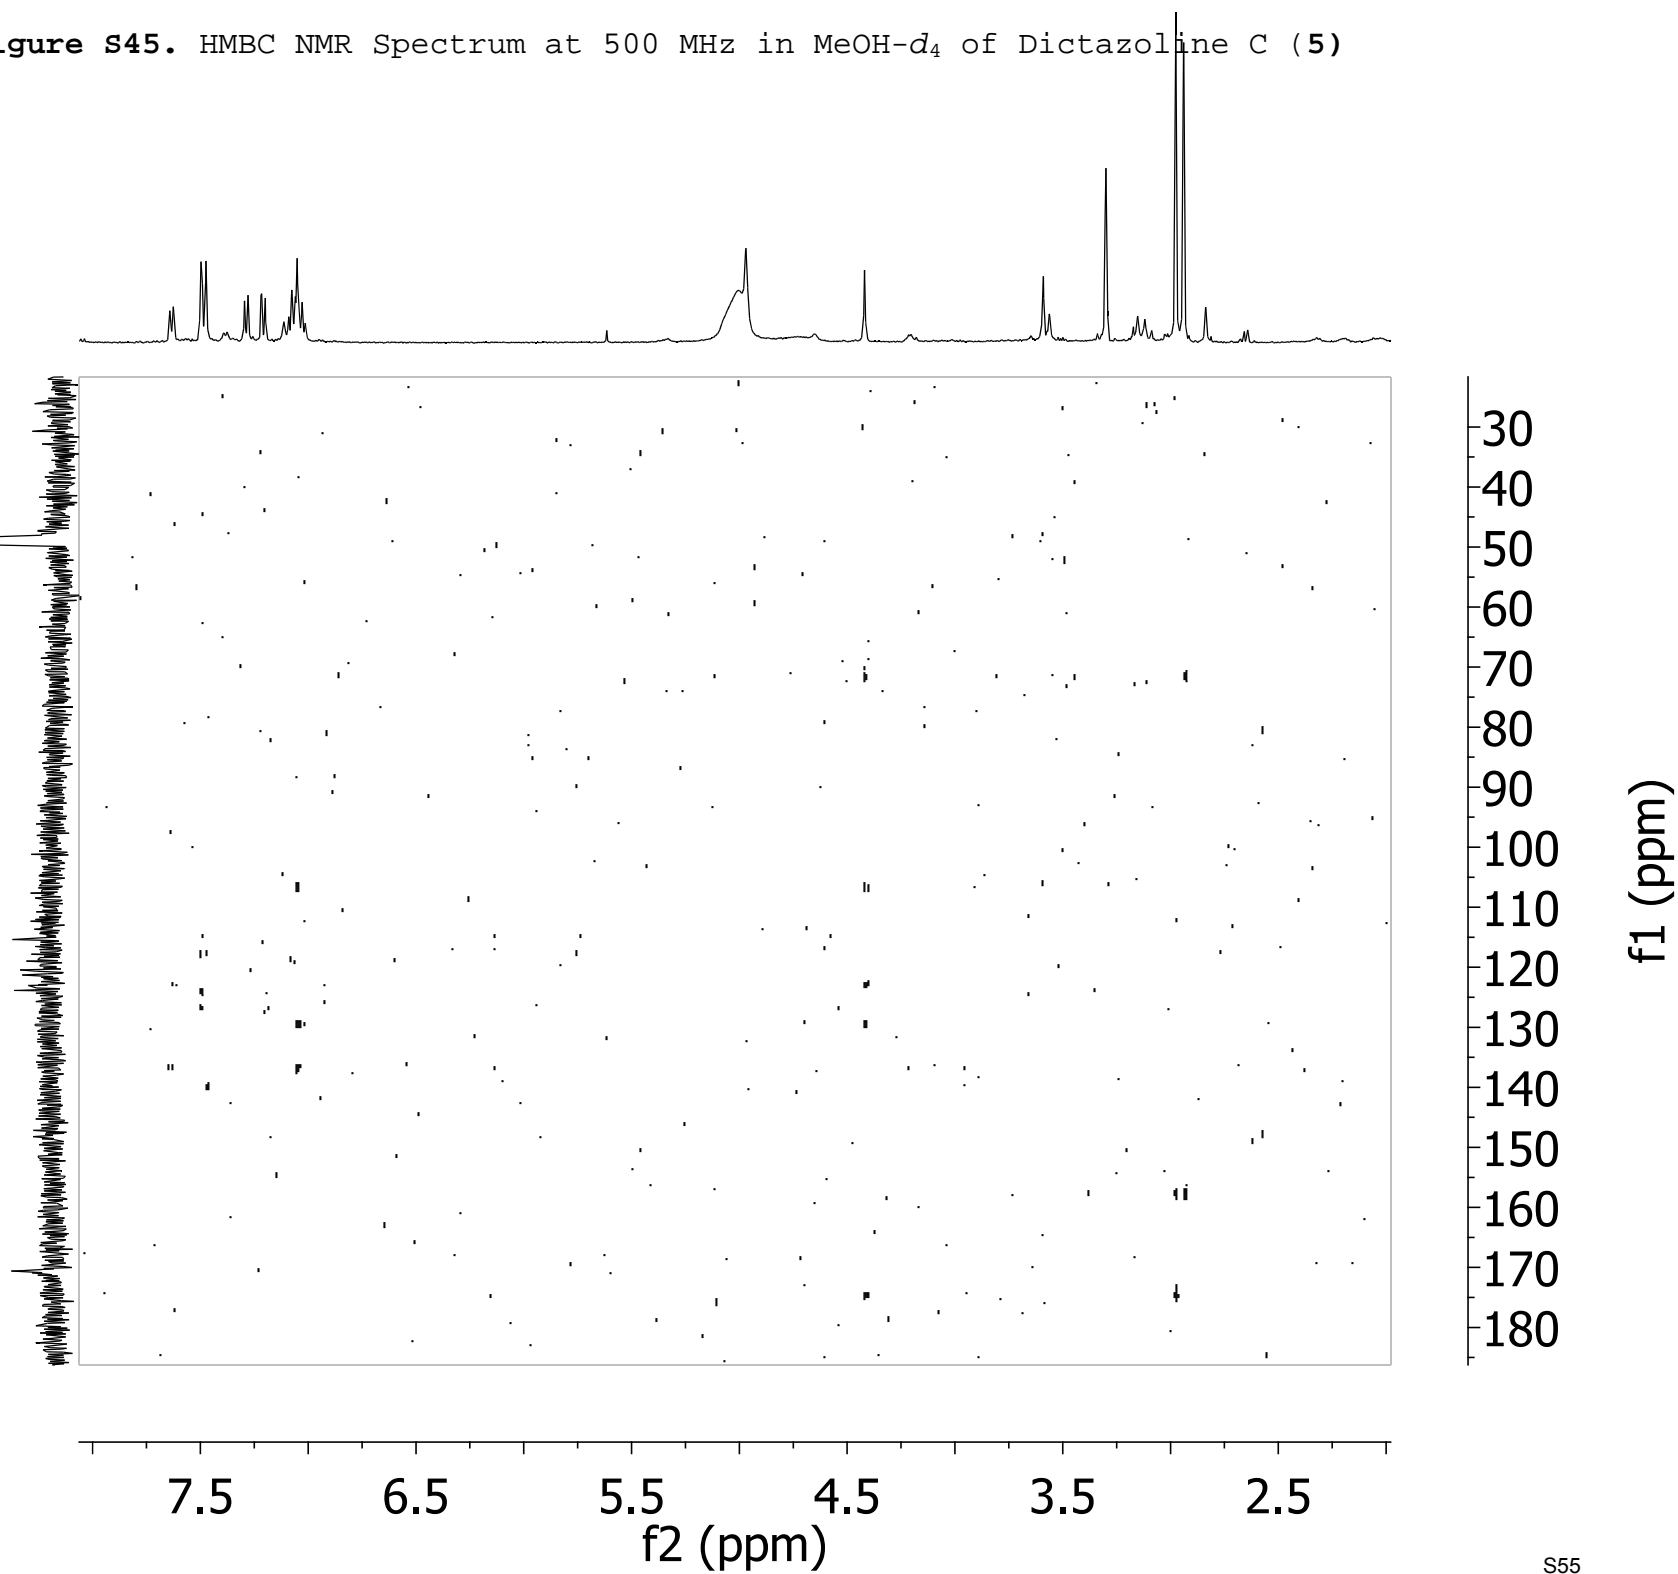

Figure S46. Expansion of HMBC NMR Spectrum at 500 MHz in MeOH- $d_4$  of Dictazoline C (5)

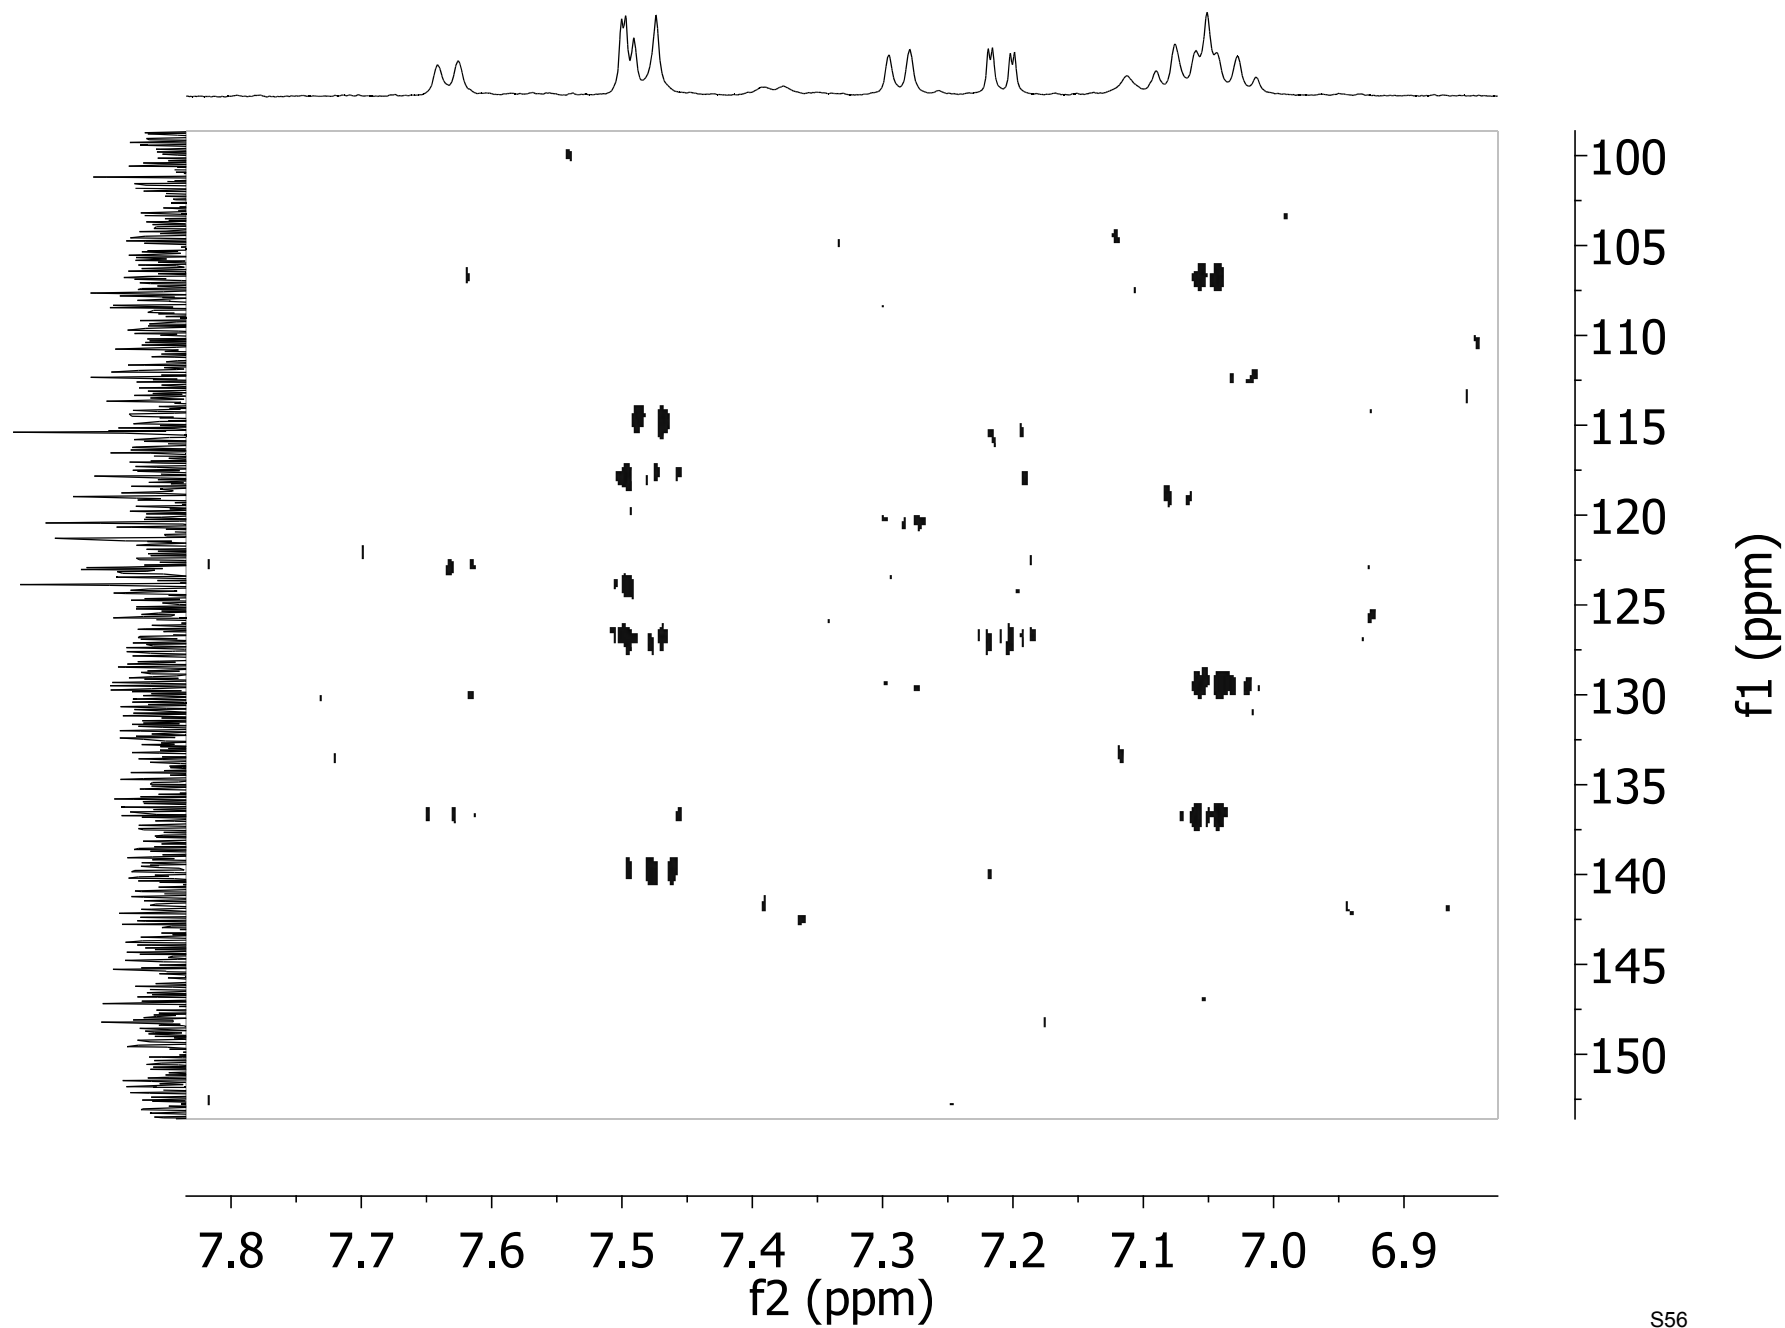



Figure S47. Expansion of HMBC NMR Spectrum at 500 MHz in MeOH- $d_4$  of Dictazoline C (5)

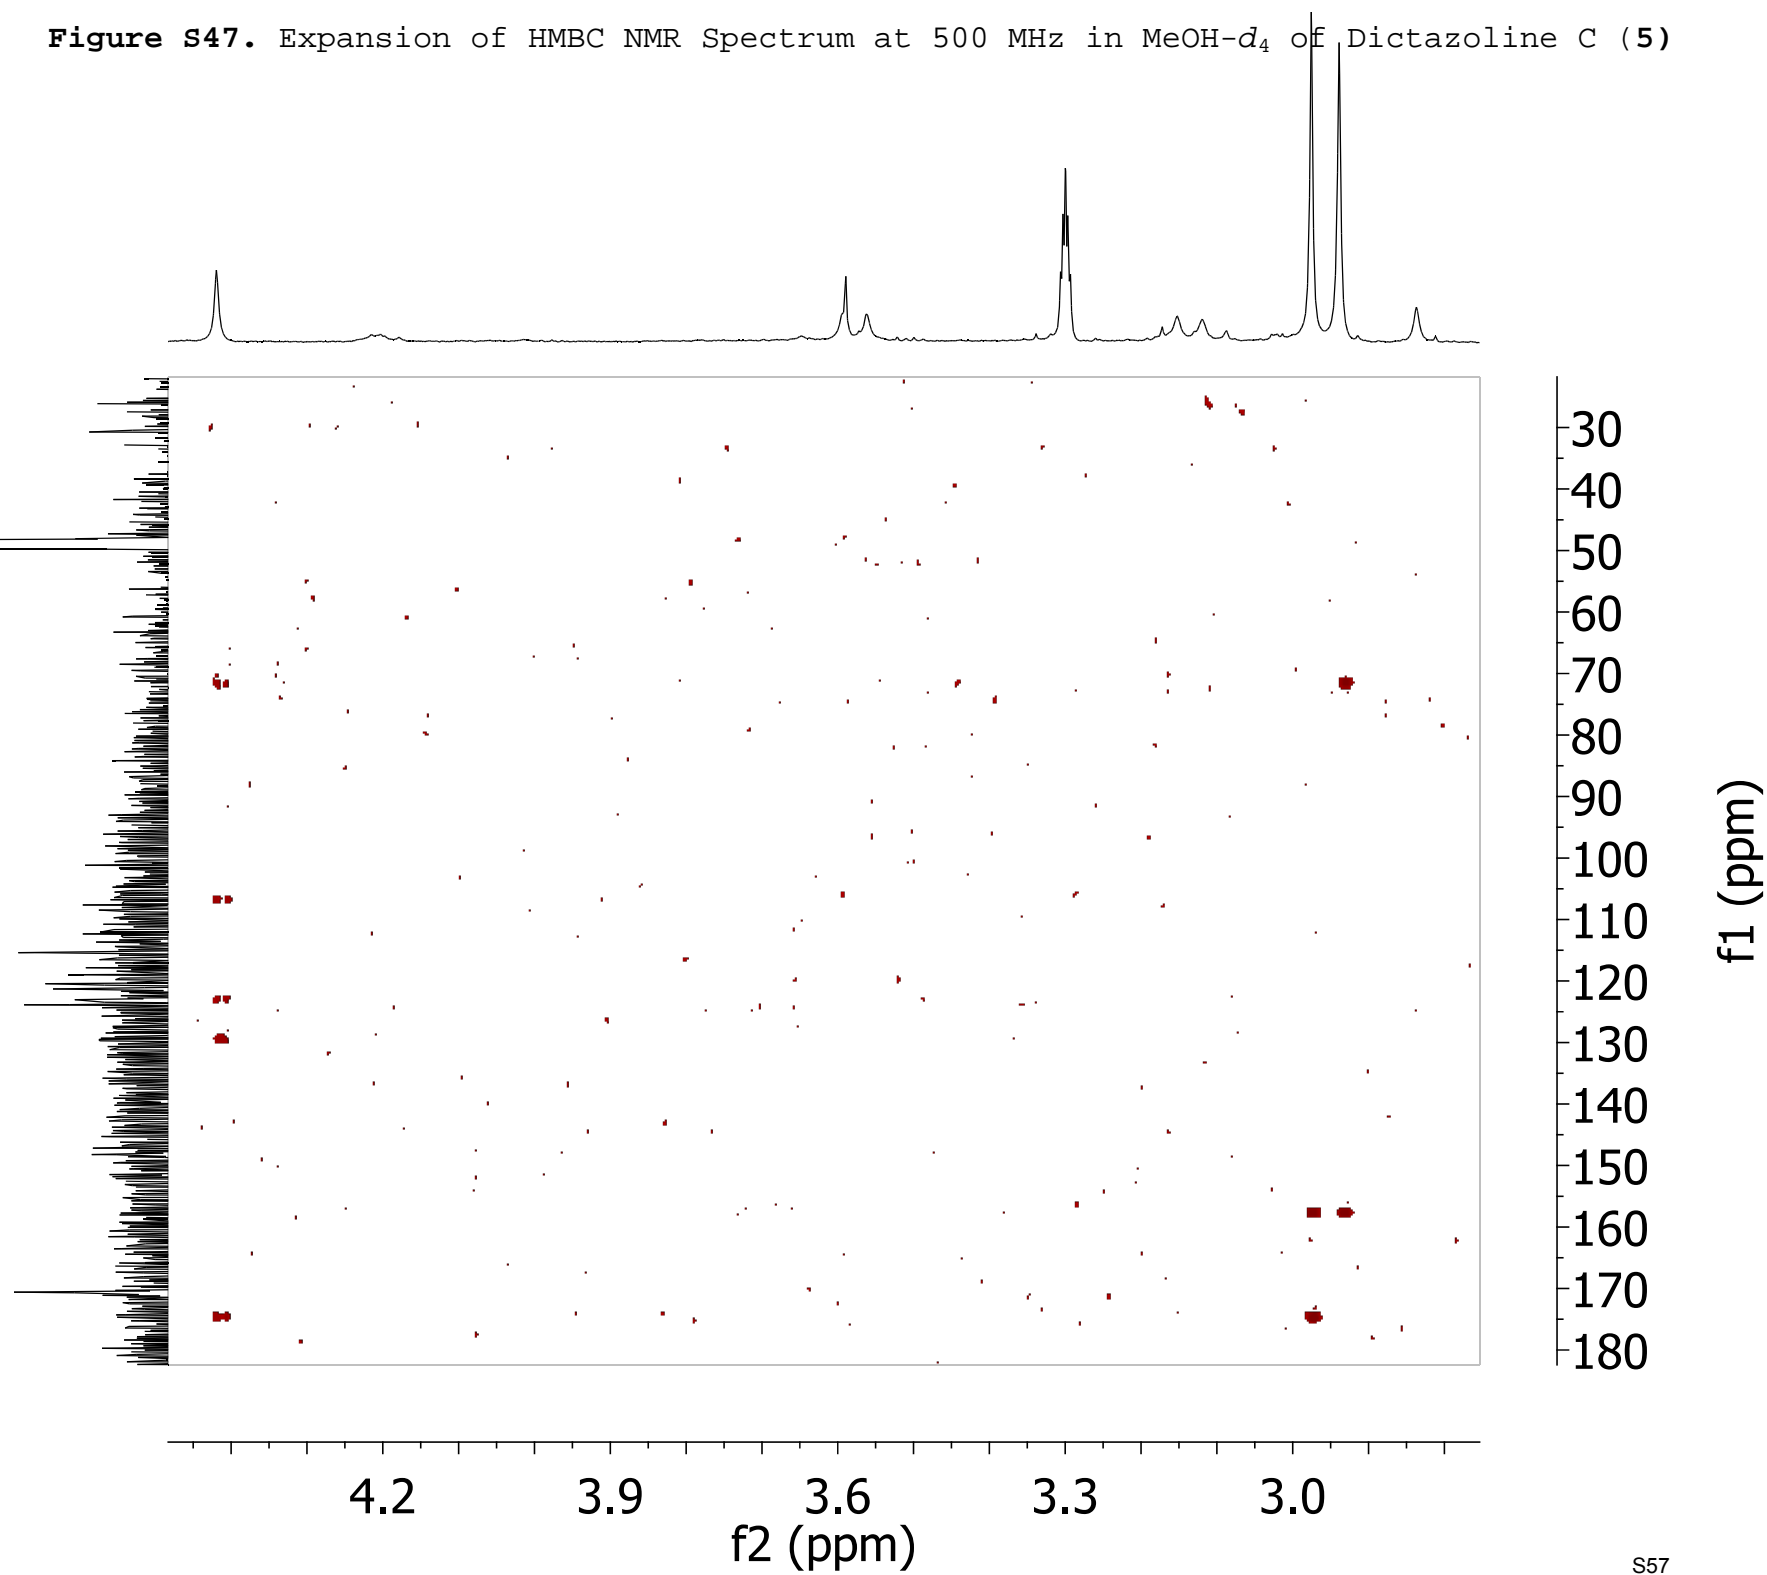

Figure S48. NOESY NMR Spectrum at 500 MHz in MeOH- $d_4$  of Dictazoline C (5)

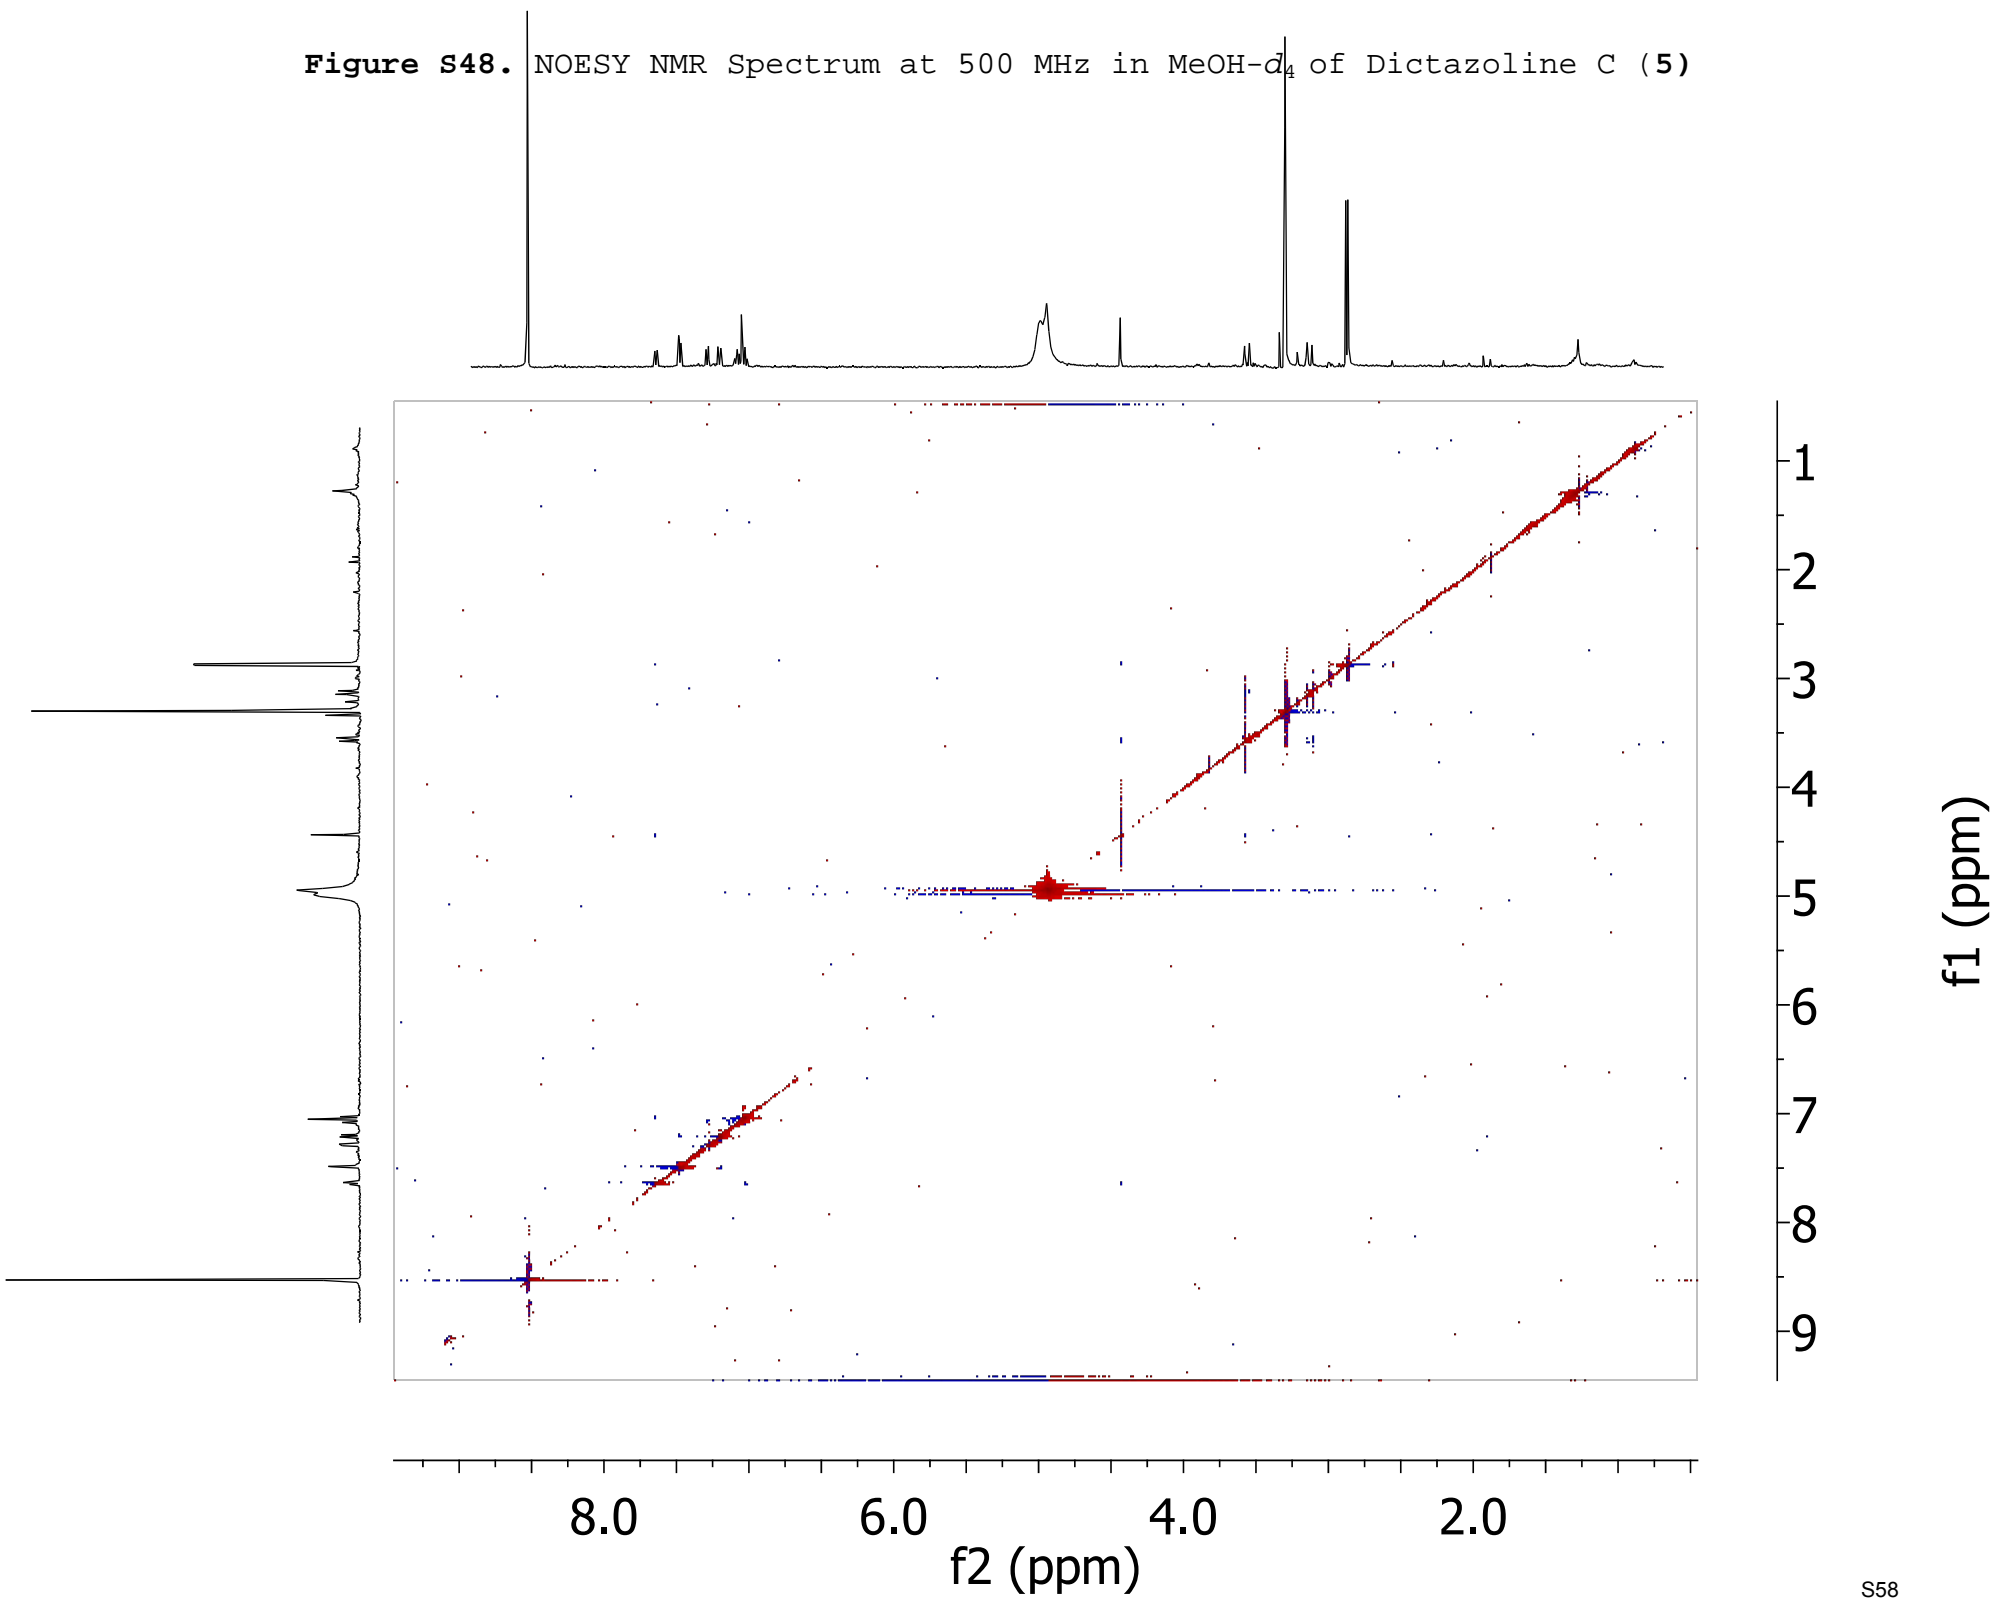

**Figure S49.** Expansion of NOESY NMR Spectrum at 500 MHz in MeOH- $d_4$  of Dictazoline C (5)

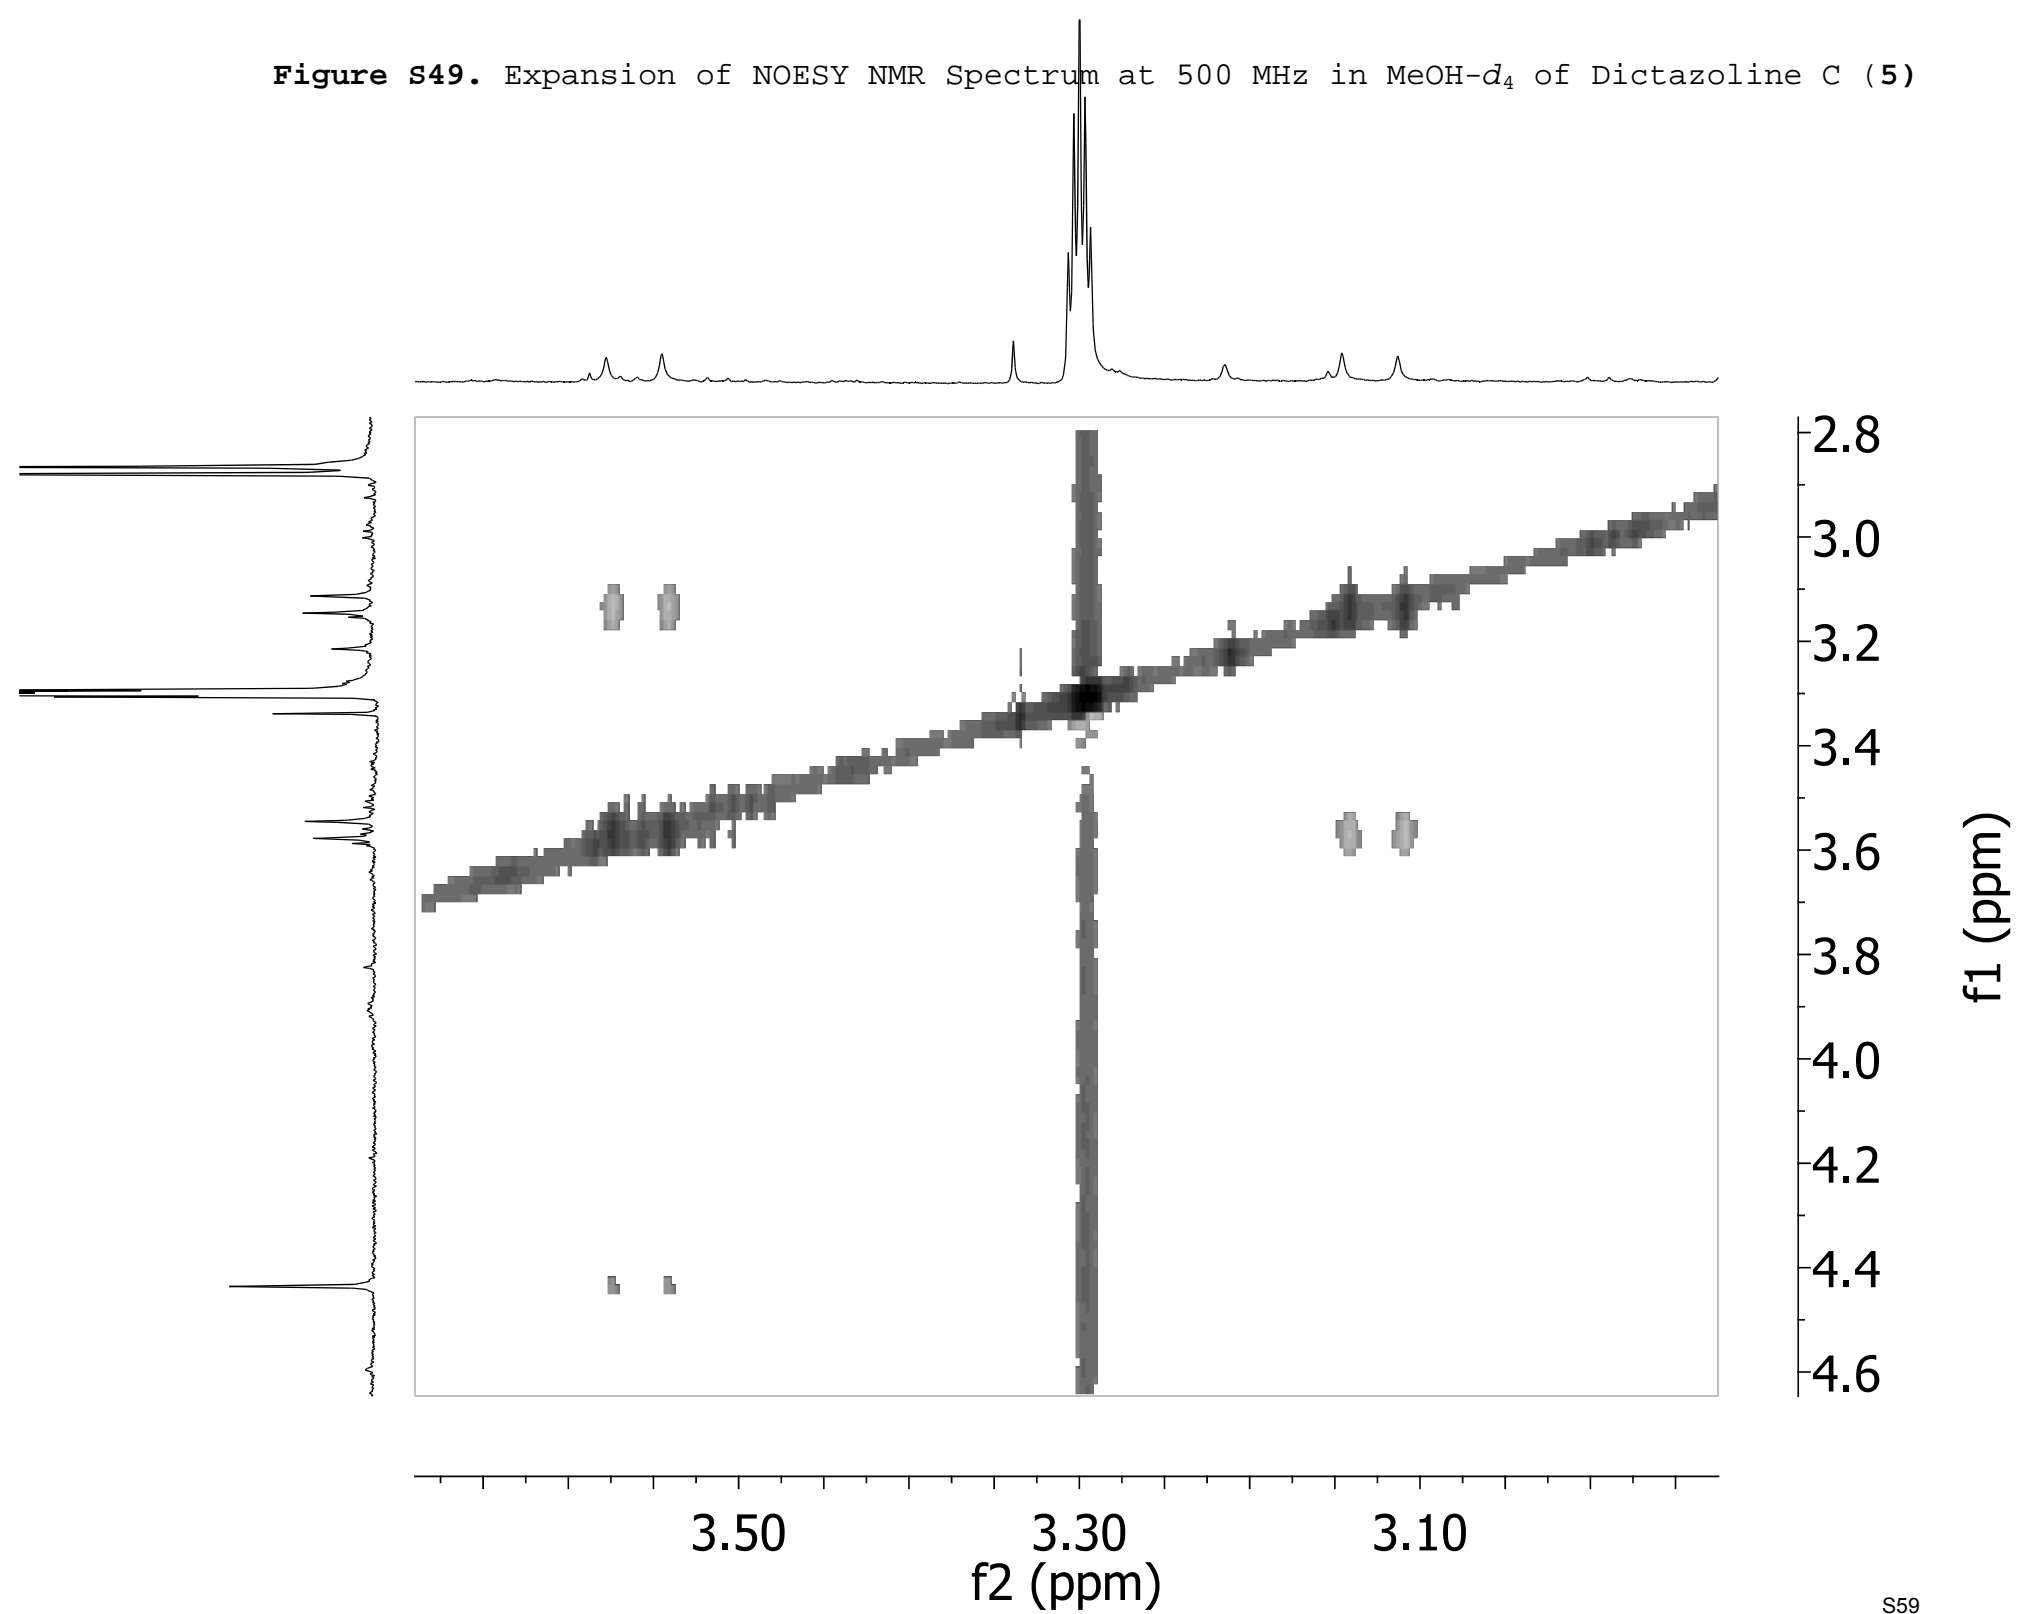

**Figure S50.** Expansion of NOESY NMR Spectrum at 500 MHz in MeOH- $d_4$  of Dictazoline C (5)

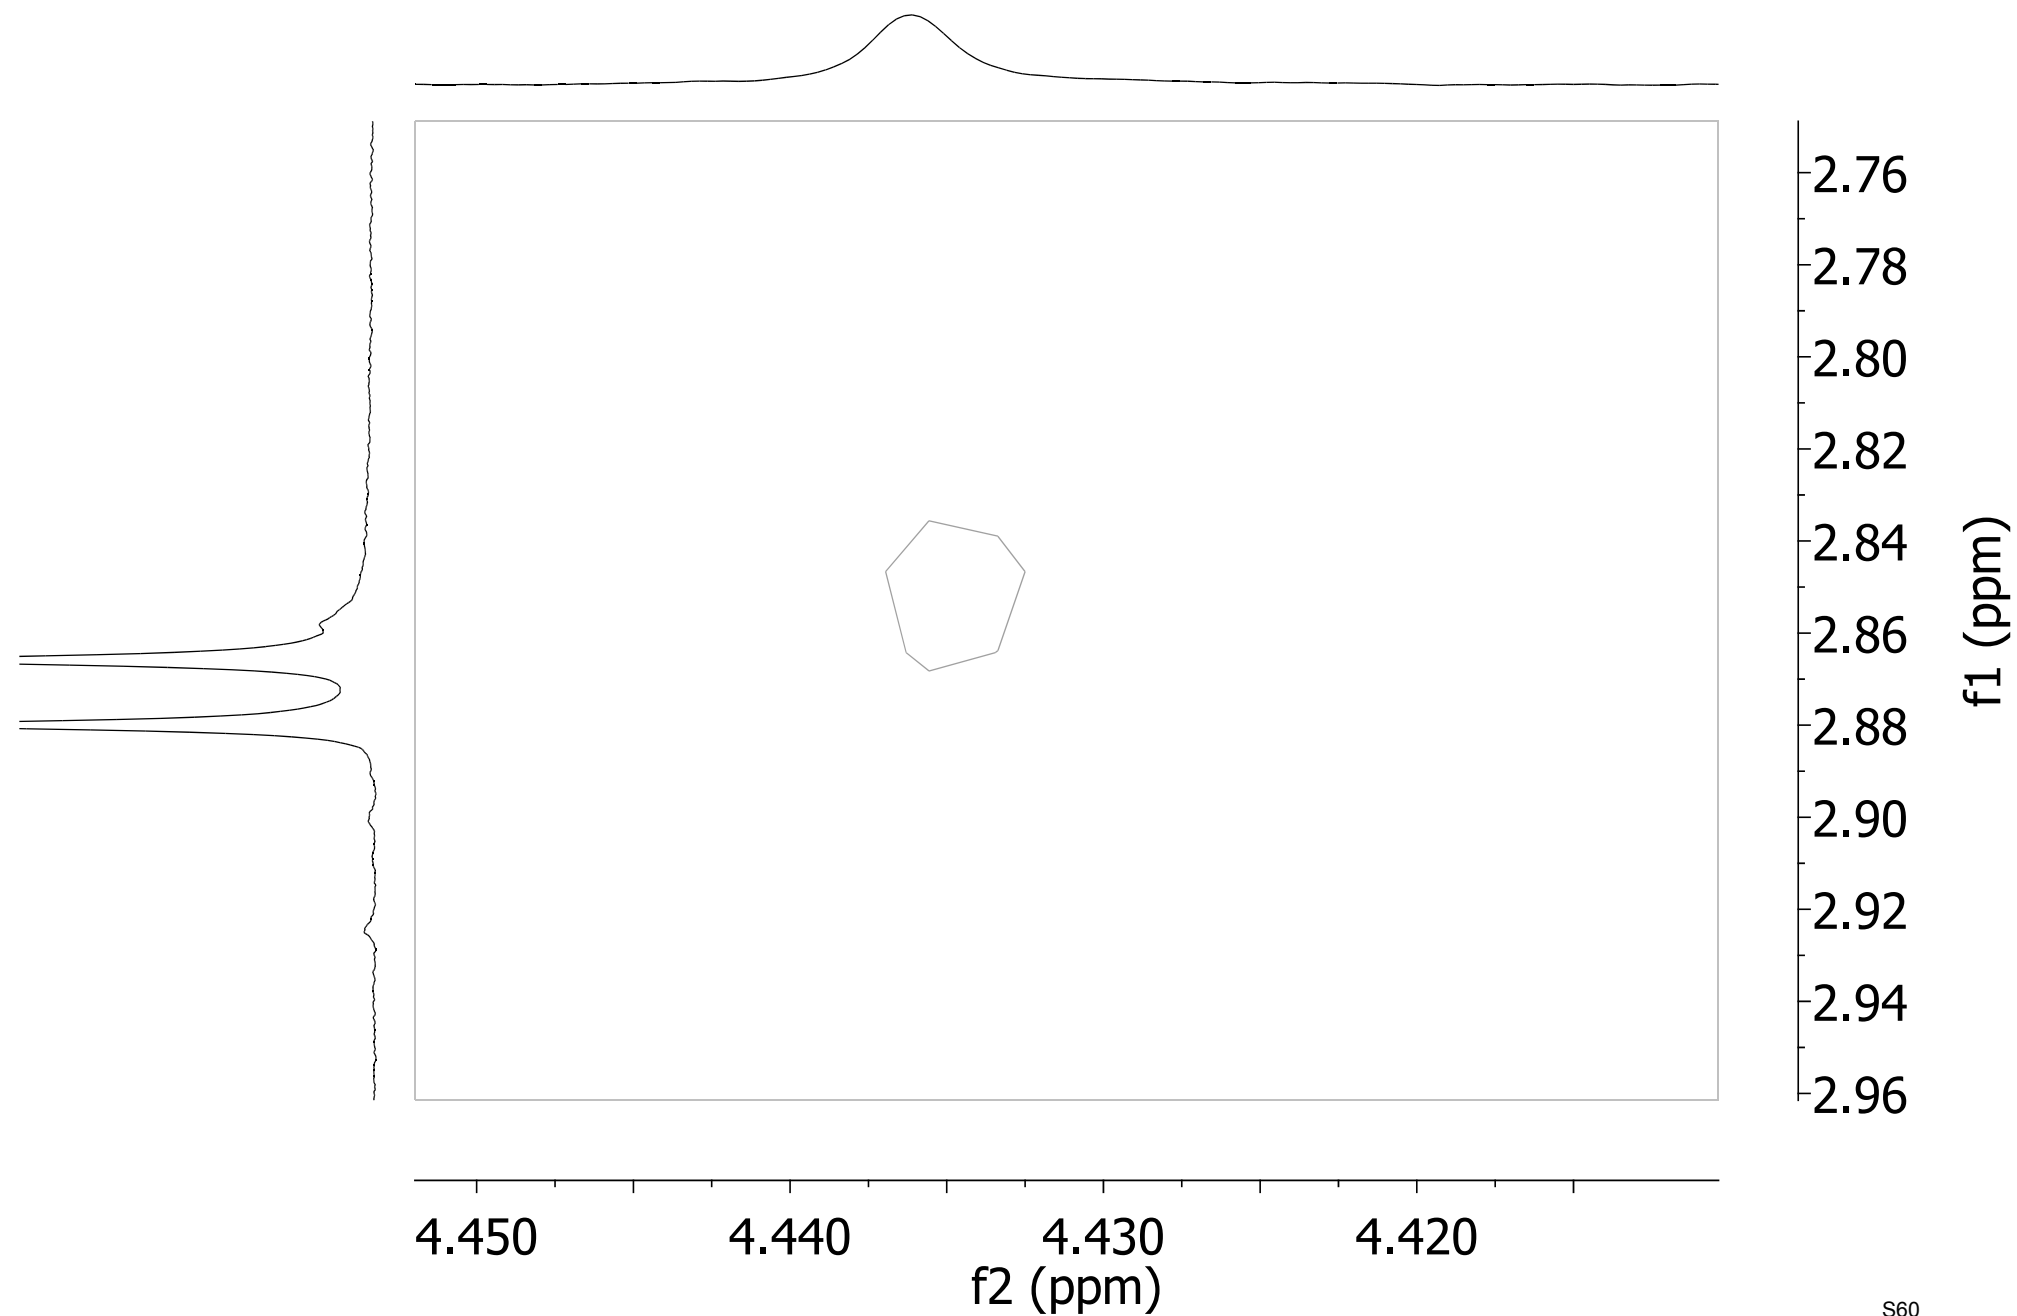

Figure S51.  $^1\text{H}$  NMR Spectrum at 500 MHz in  $\text{MeOH-}d_4$  of Dictazoline D (**6**) with water suppression

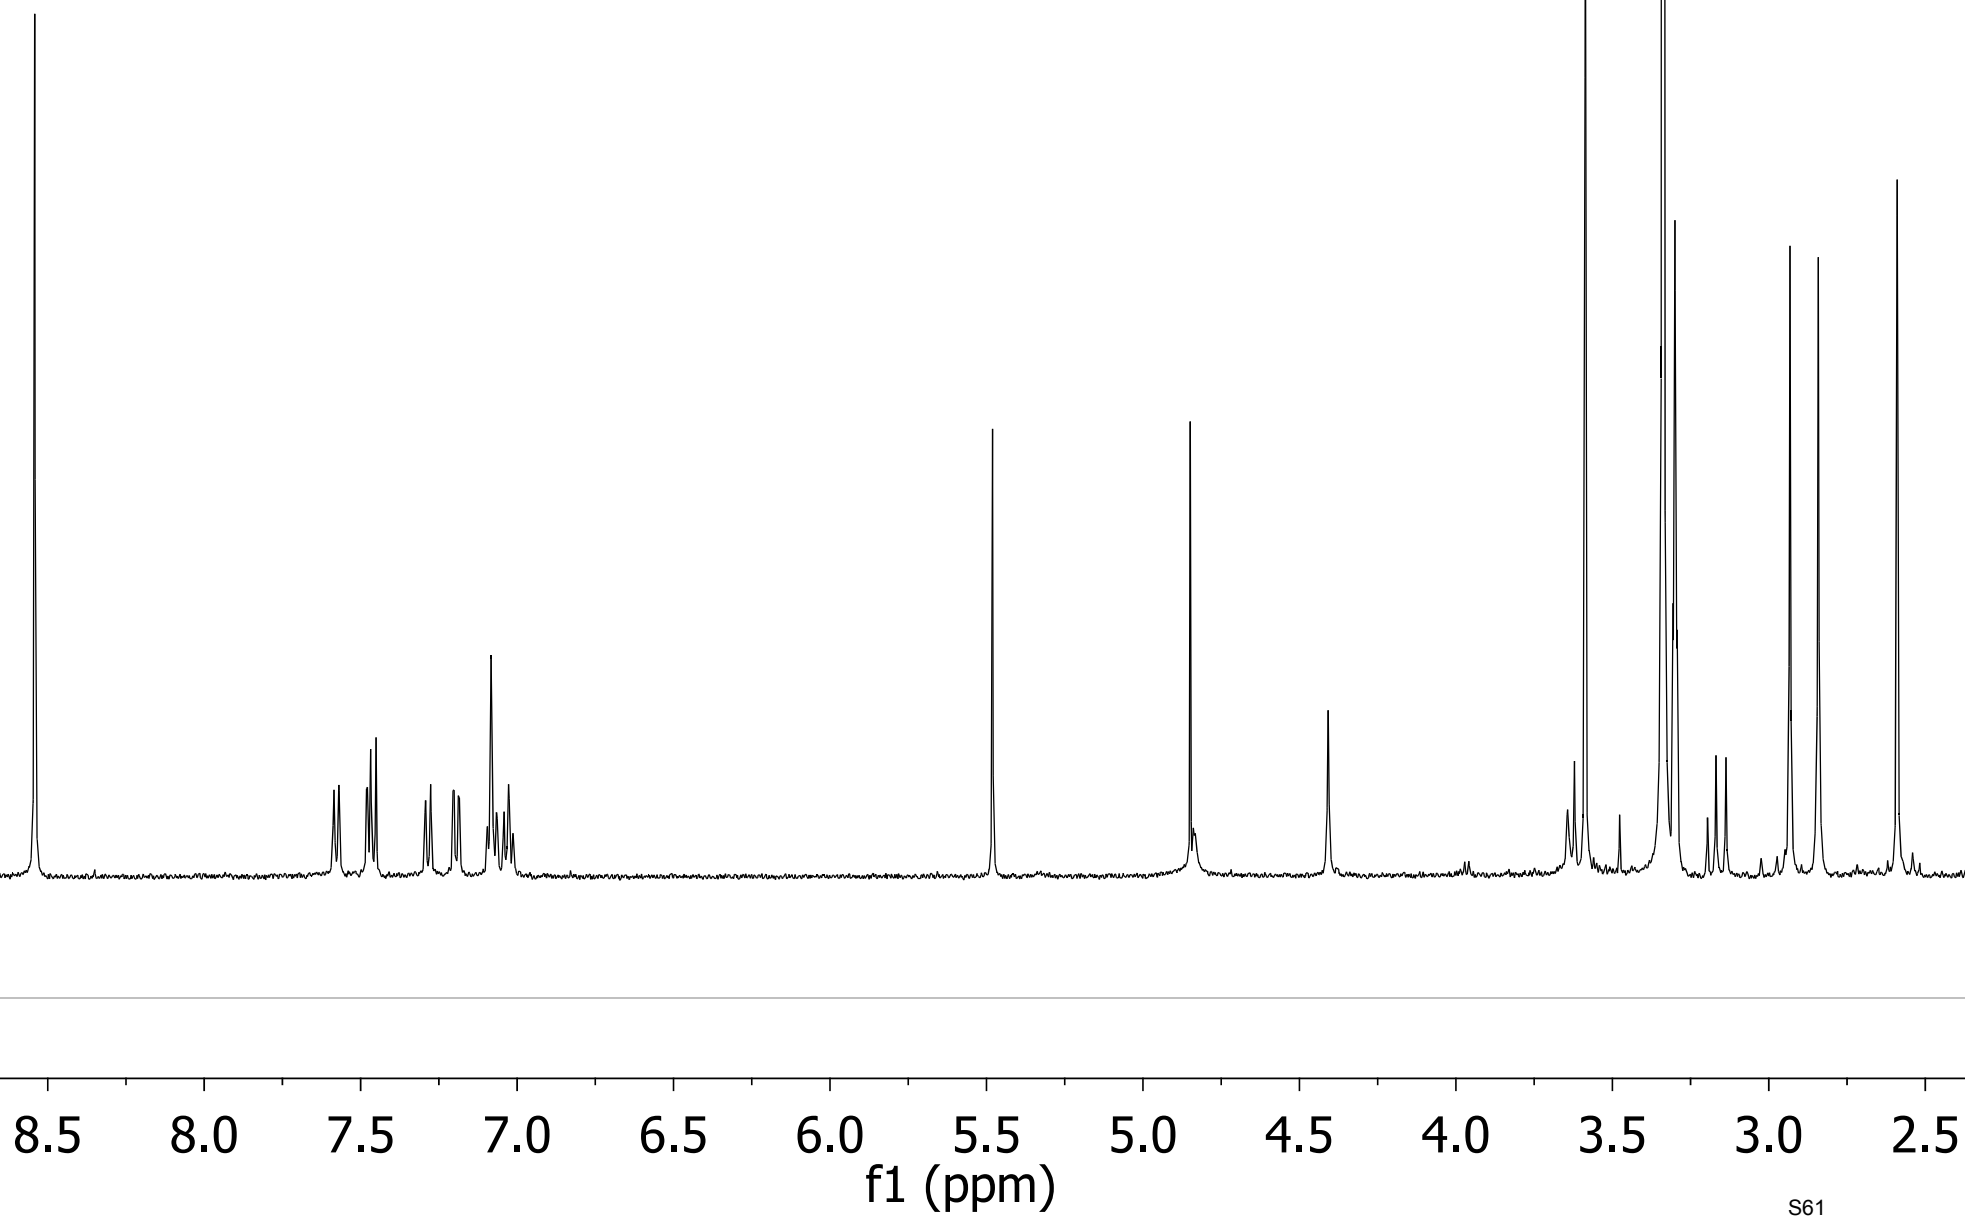

Figure S52. HSQC Spectrum at 500 MHz in DMSO- $d_6$  of Dictazoline D (6)

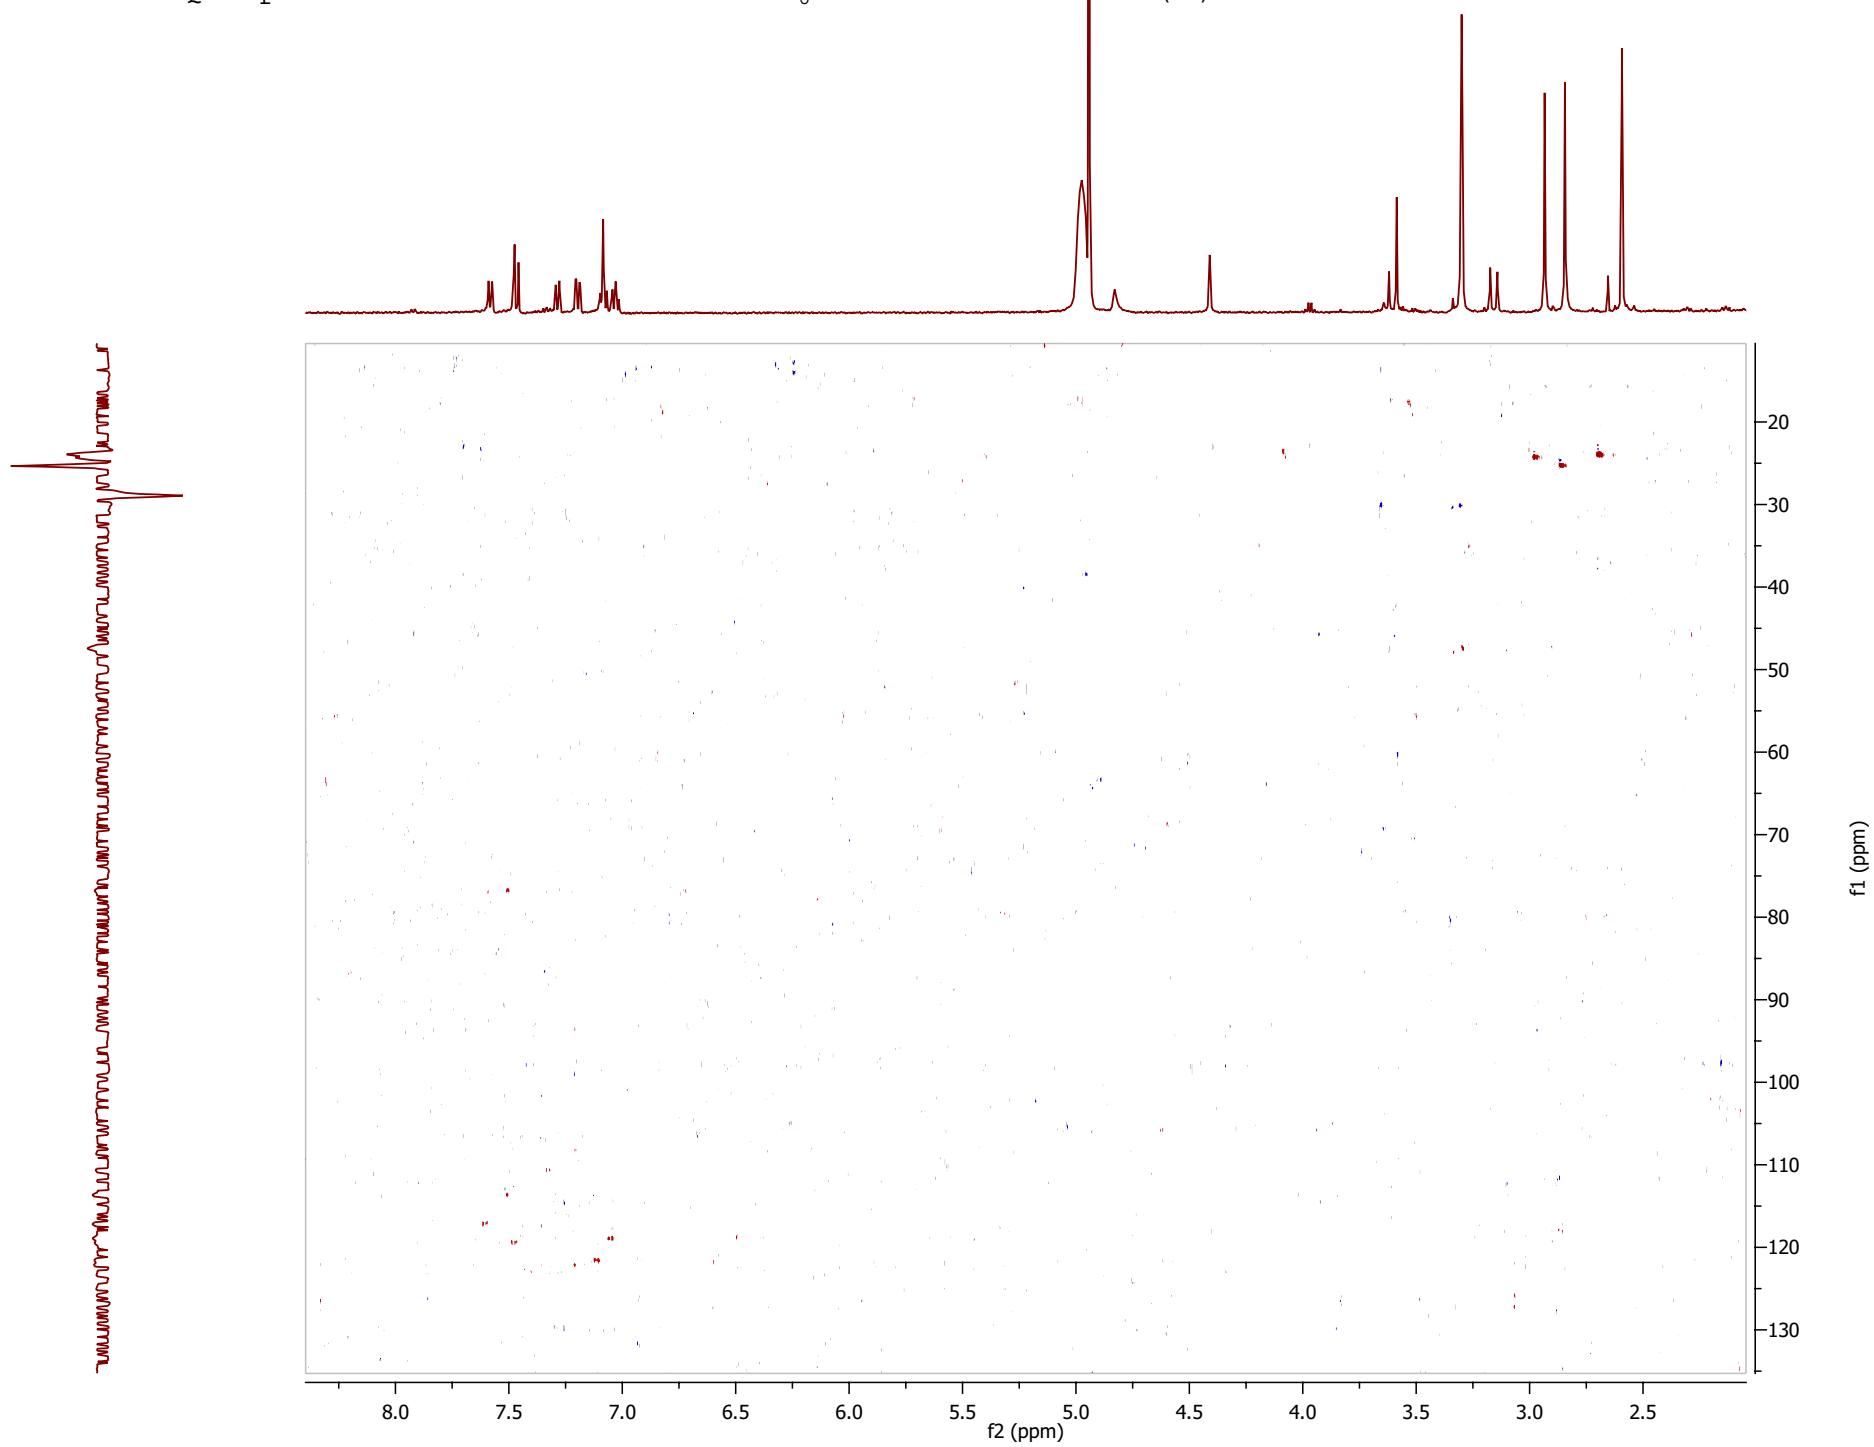

**Figure S53.** Expansion of HSQC Spectrum at 500 MHz in DMSO- $d_6$  of Dictazoline D (**6**)

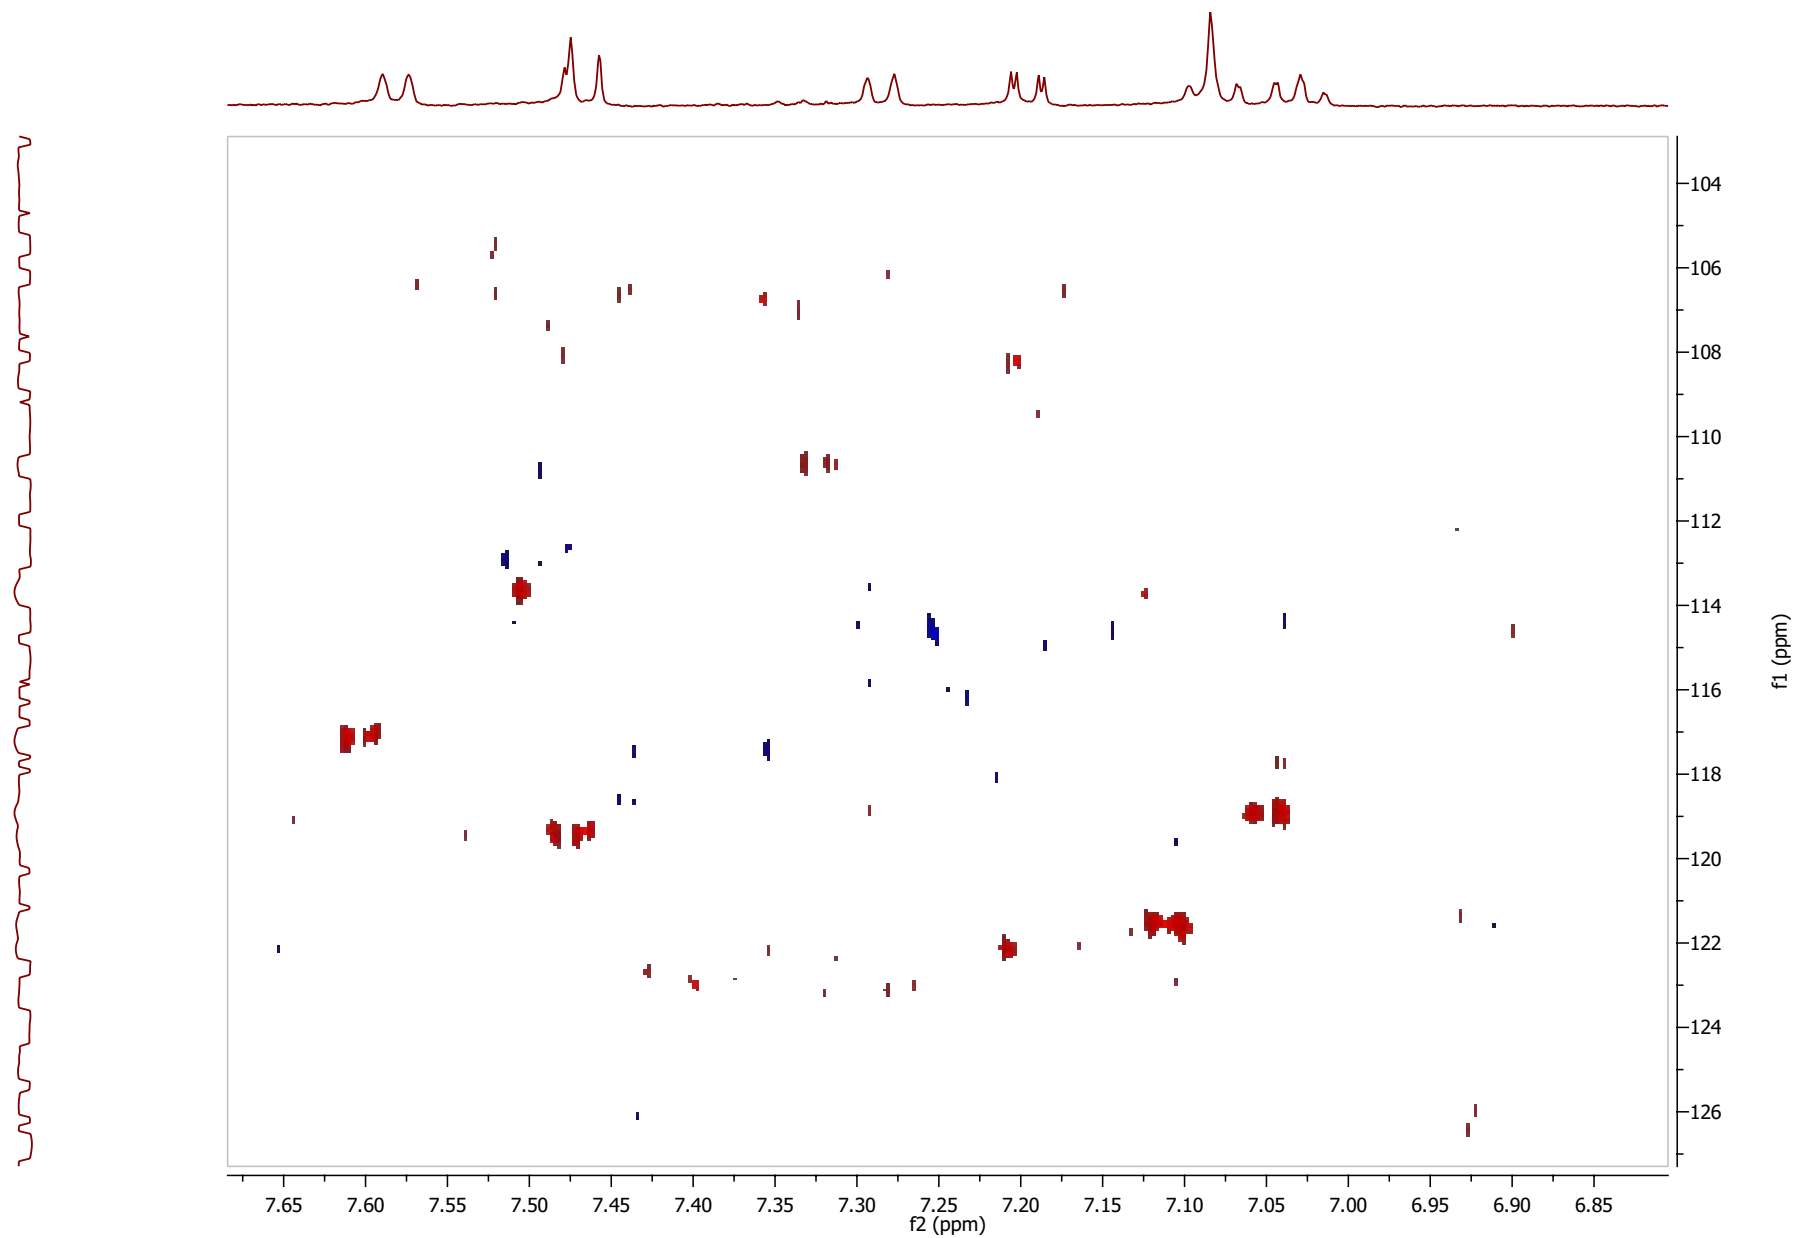

**Figure S54.** Expansion of HSQC Spectrum at 500 MHz in DMSO- $d_6$  of Dictazoline D (**6**)

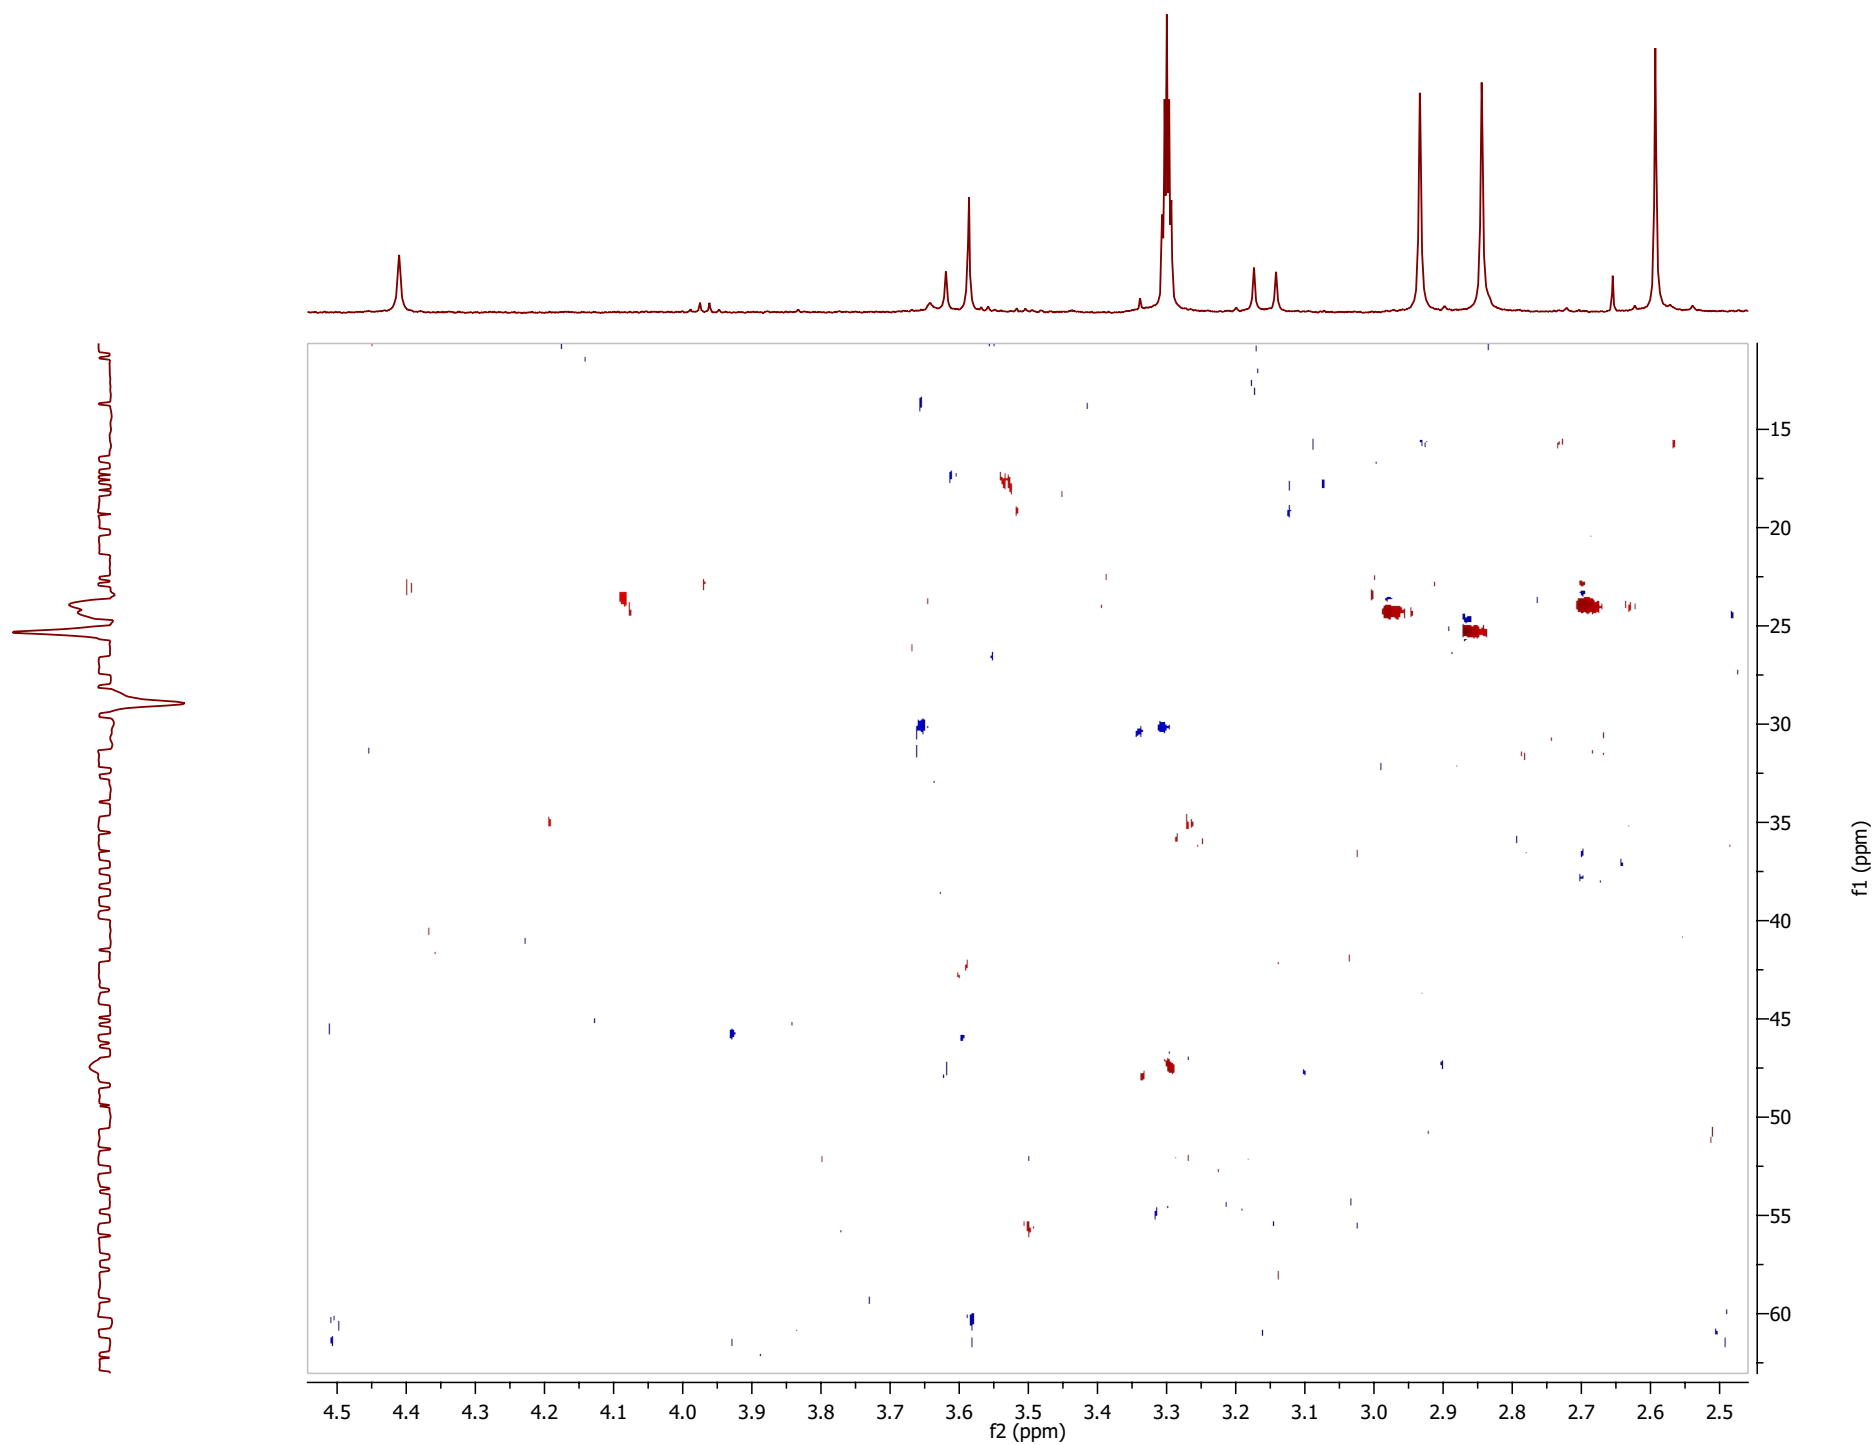



Figure S55. HMBC Spectrum at 500 MHz in DMSO- $d_6$  of Dictazoline D (**6**)

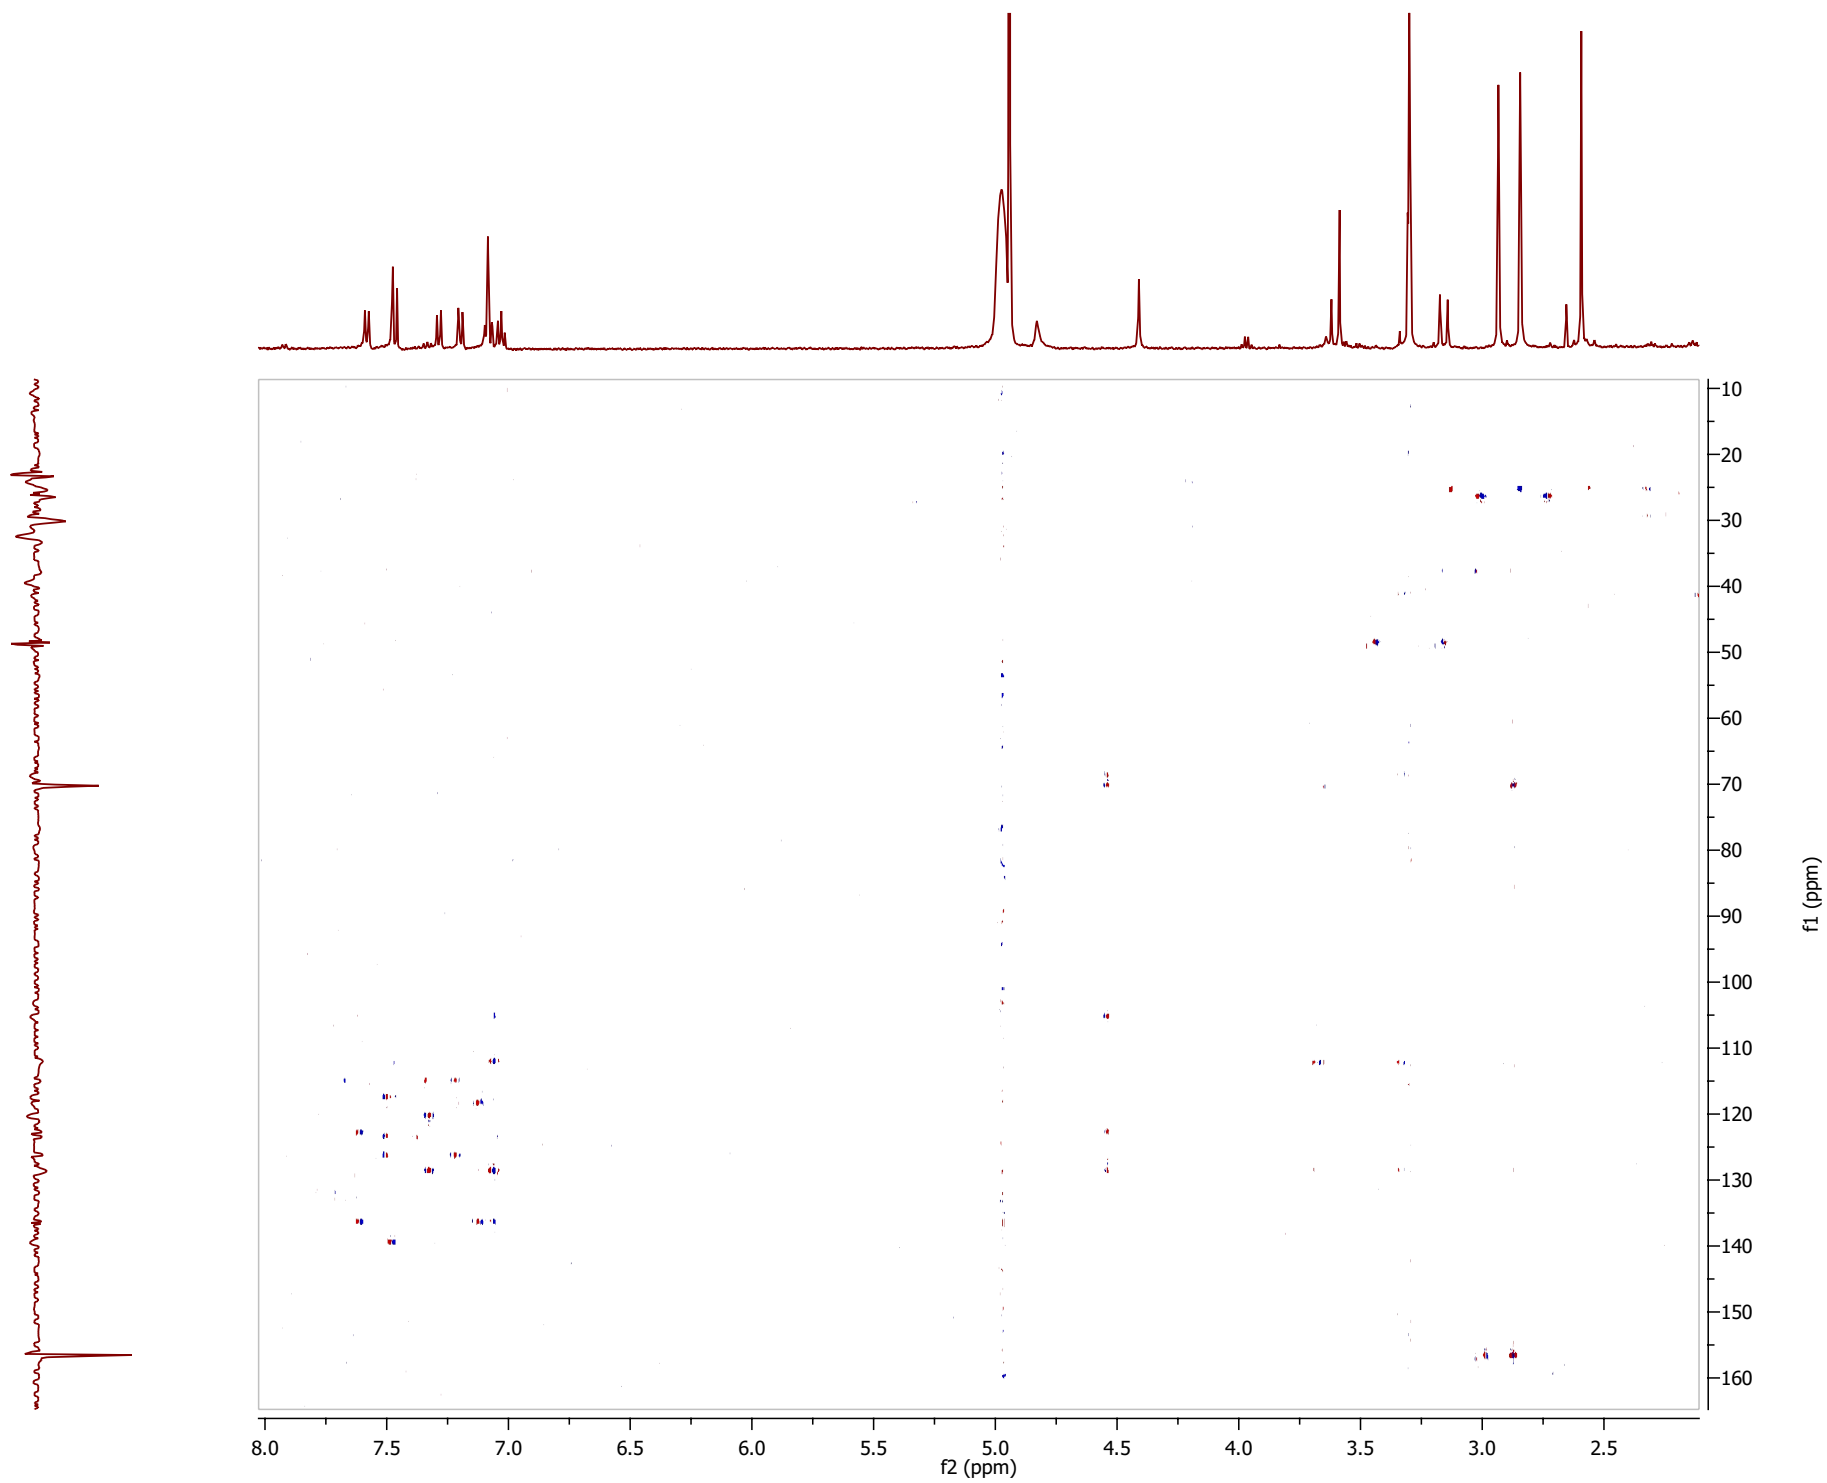

**Figure S56.** Expansion of HMBC Spectrum at 500 MHz in DMSO- $d_6$  of Dictazole B (**2**)

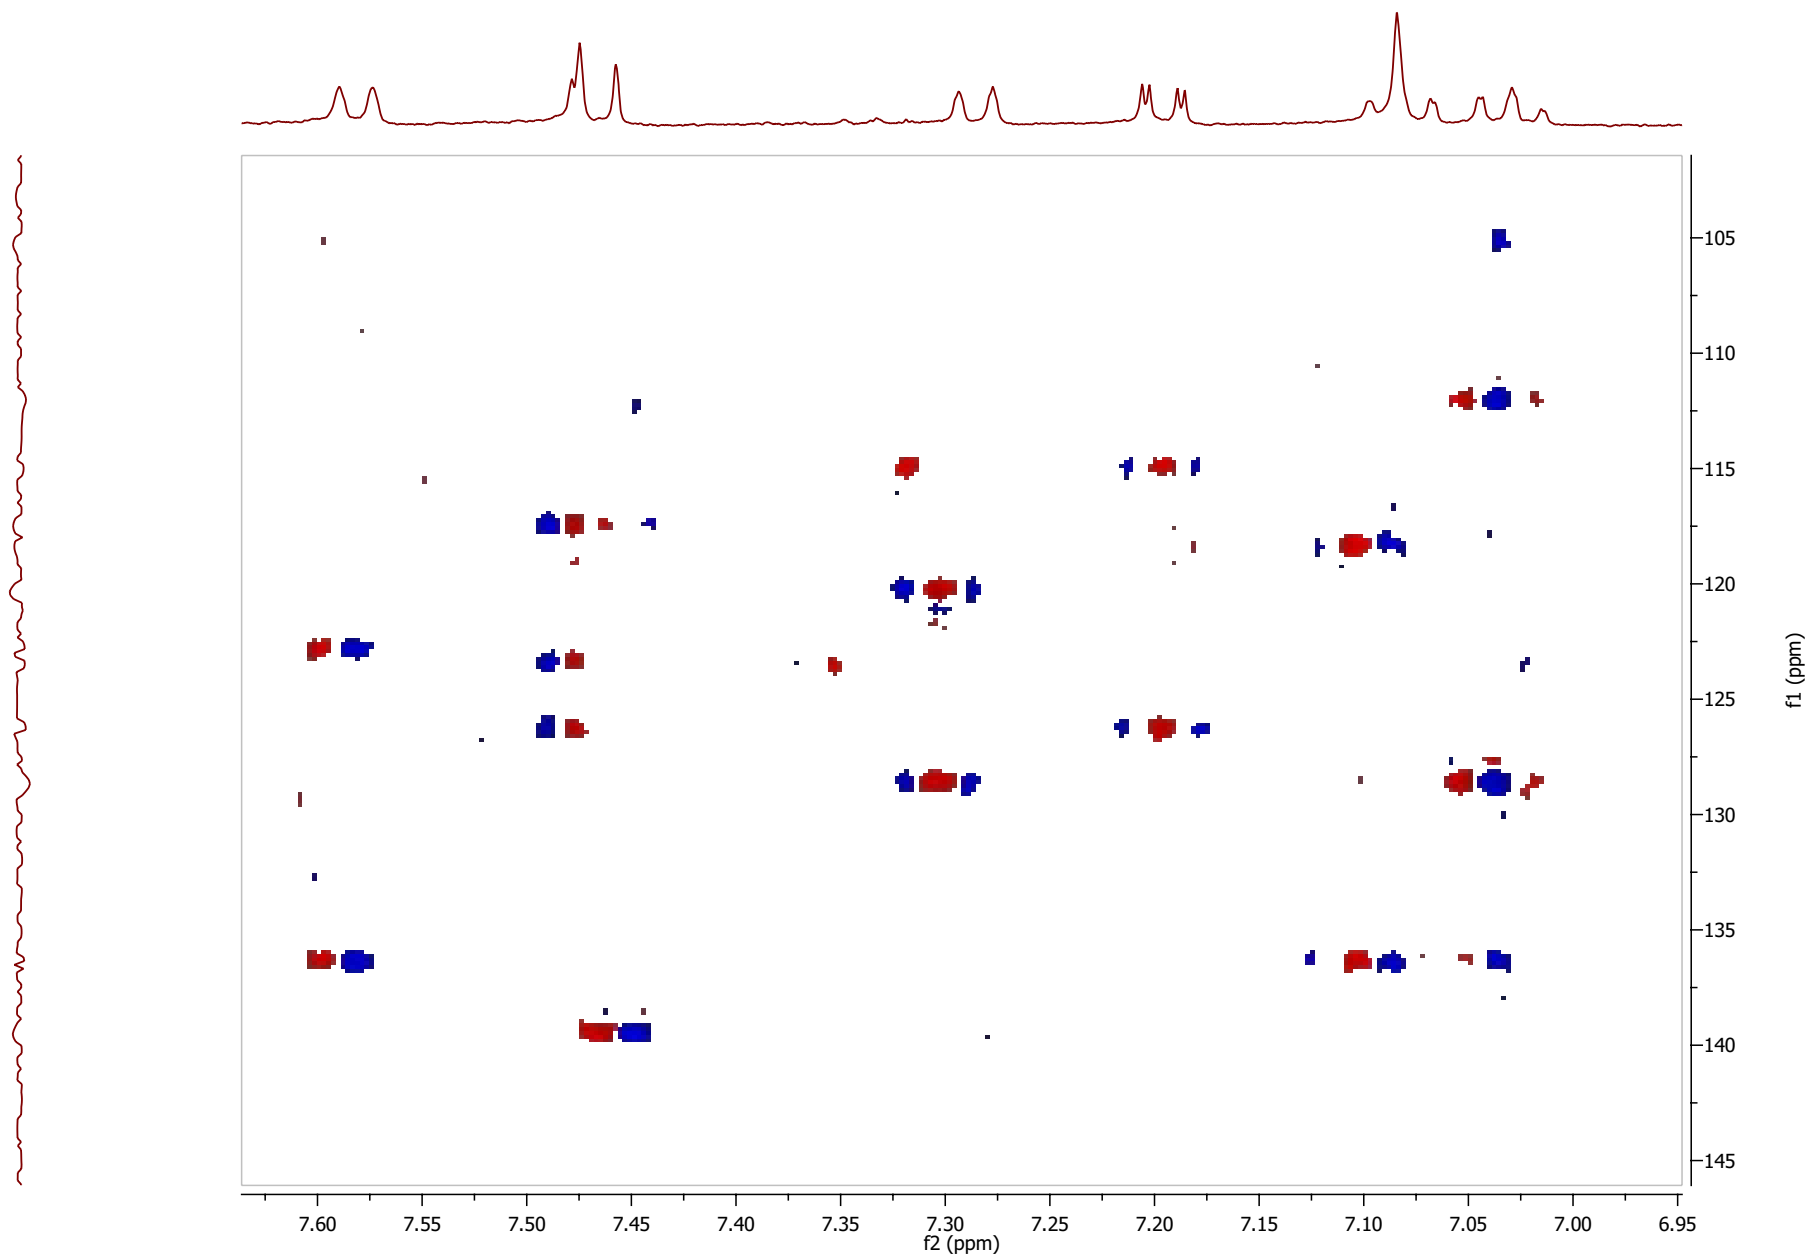

Figure S57. Expansion of HMBC Spectrum at 500 MHz in DMSO- $d_6$  of Dictazole B (2)

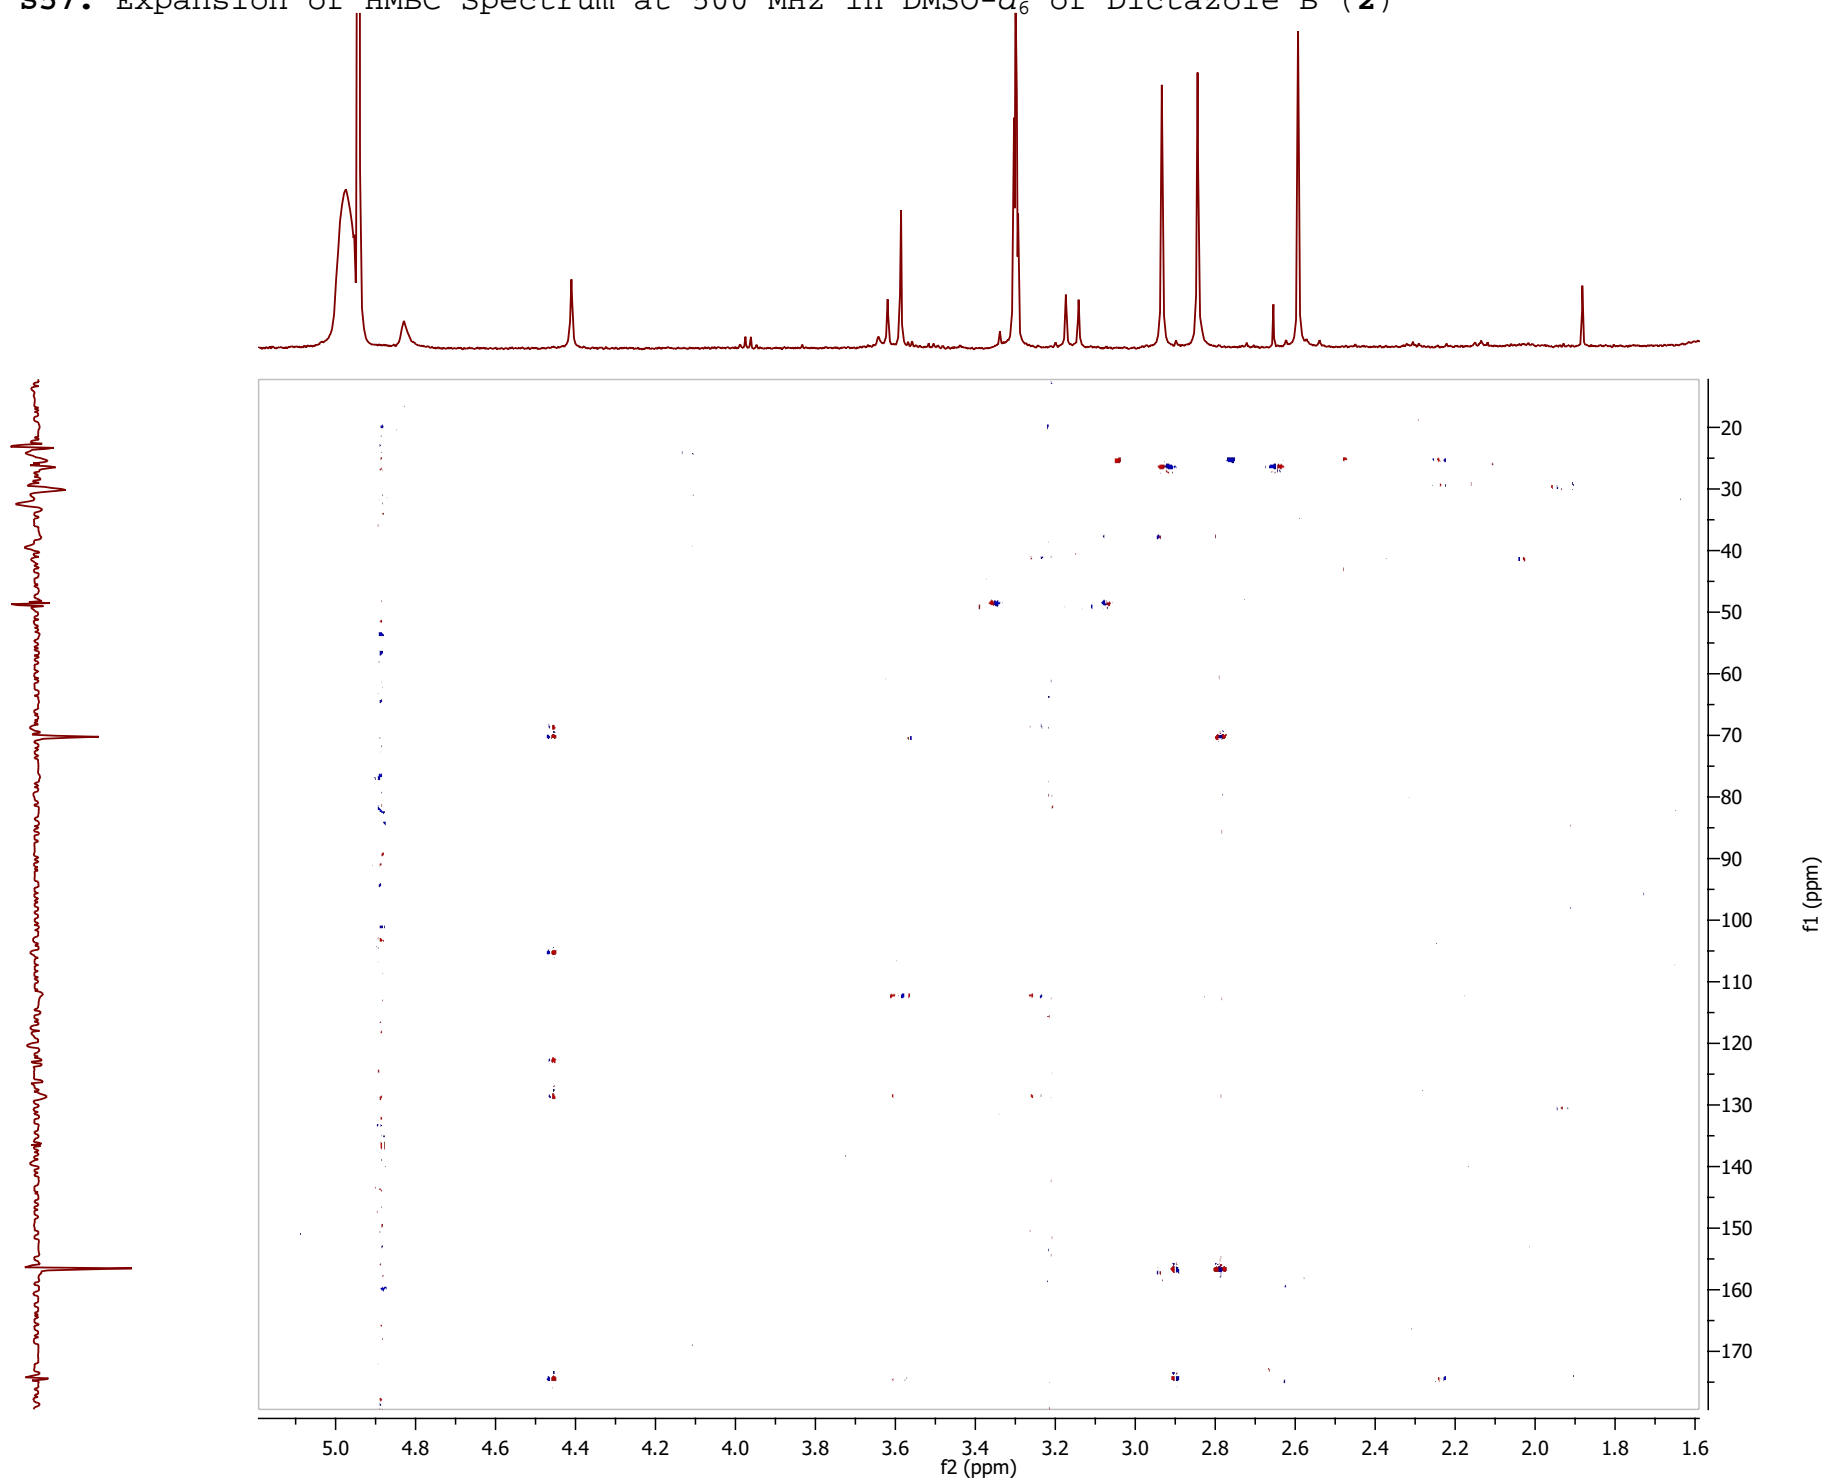

Figure S58. Expansion of HMBC Spectrum at 500 MHz in DMSO- $d_6$  of Dictazole B (2)

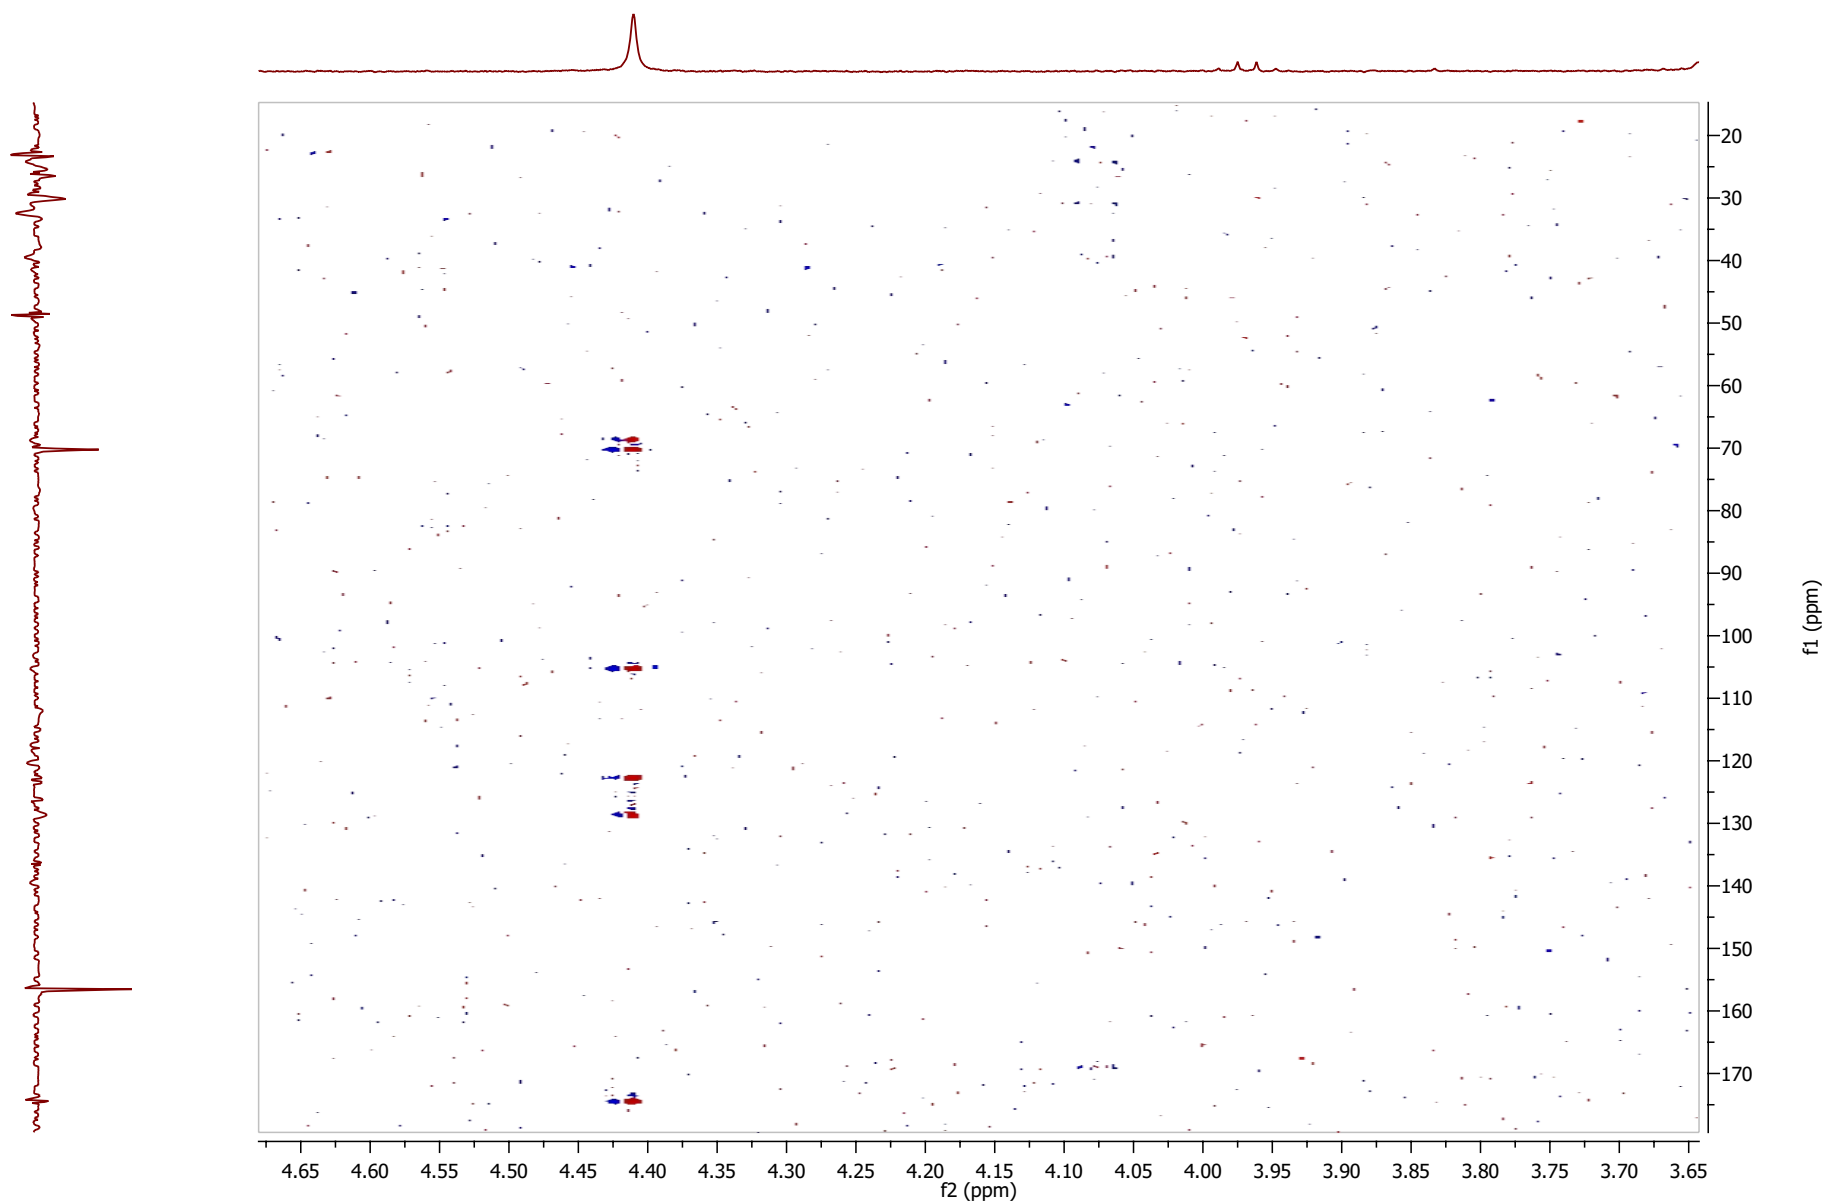

Figure S59. Expansion of HMBC Spectrum at 500 MHz in DMSO- $d_6$  of Dictazole B (2)

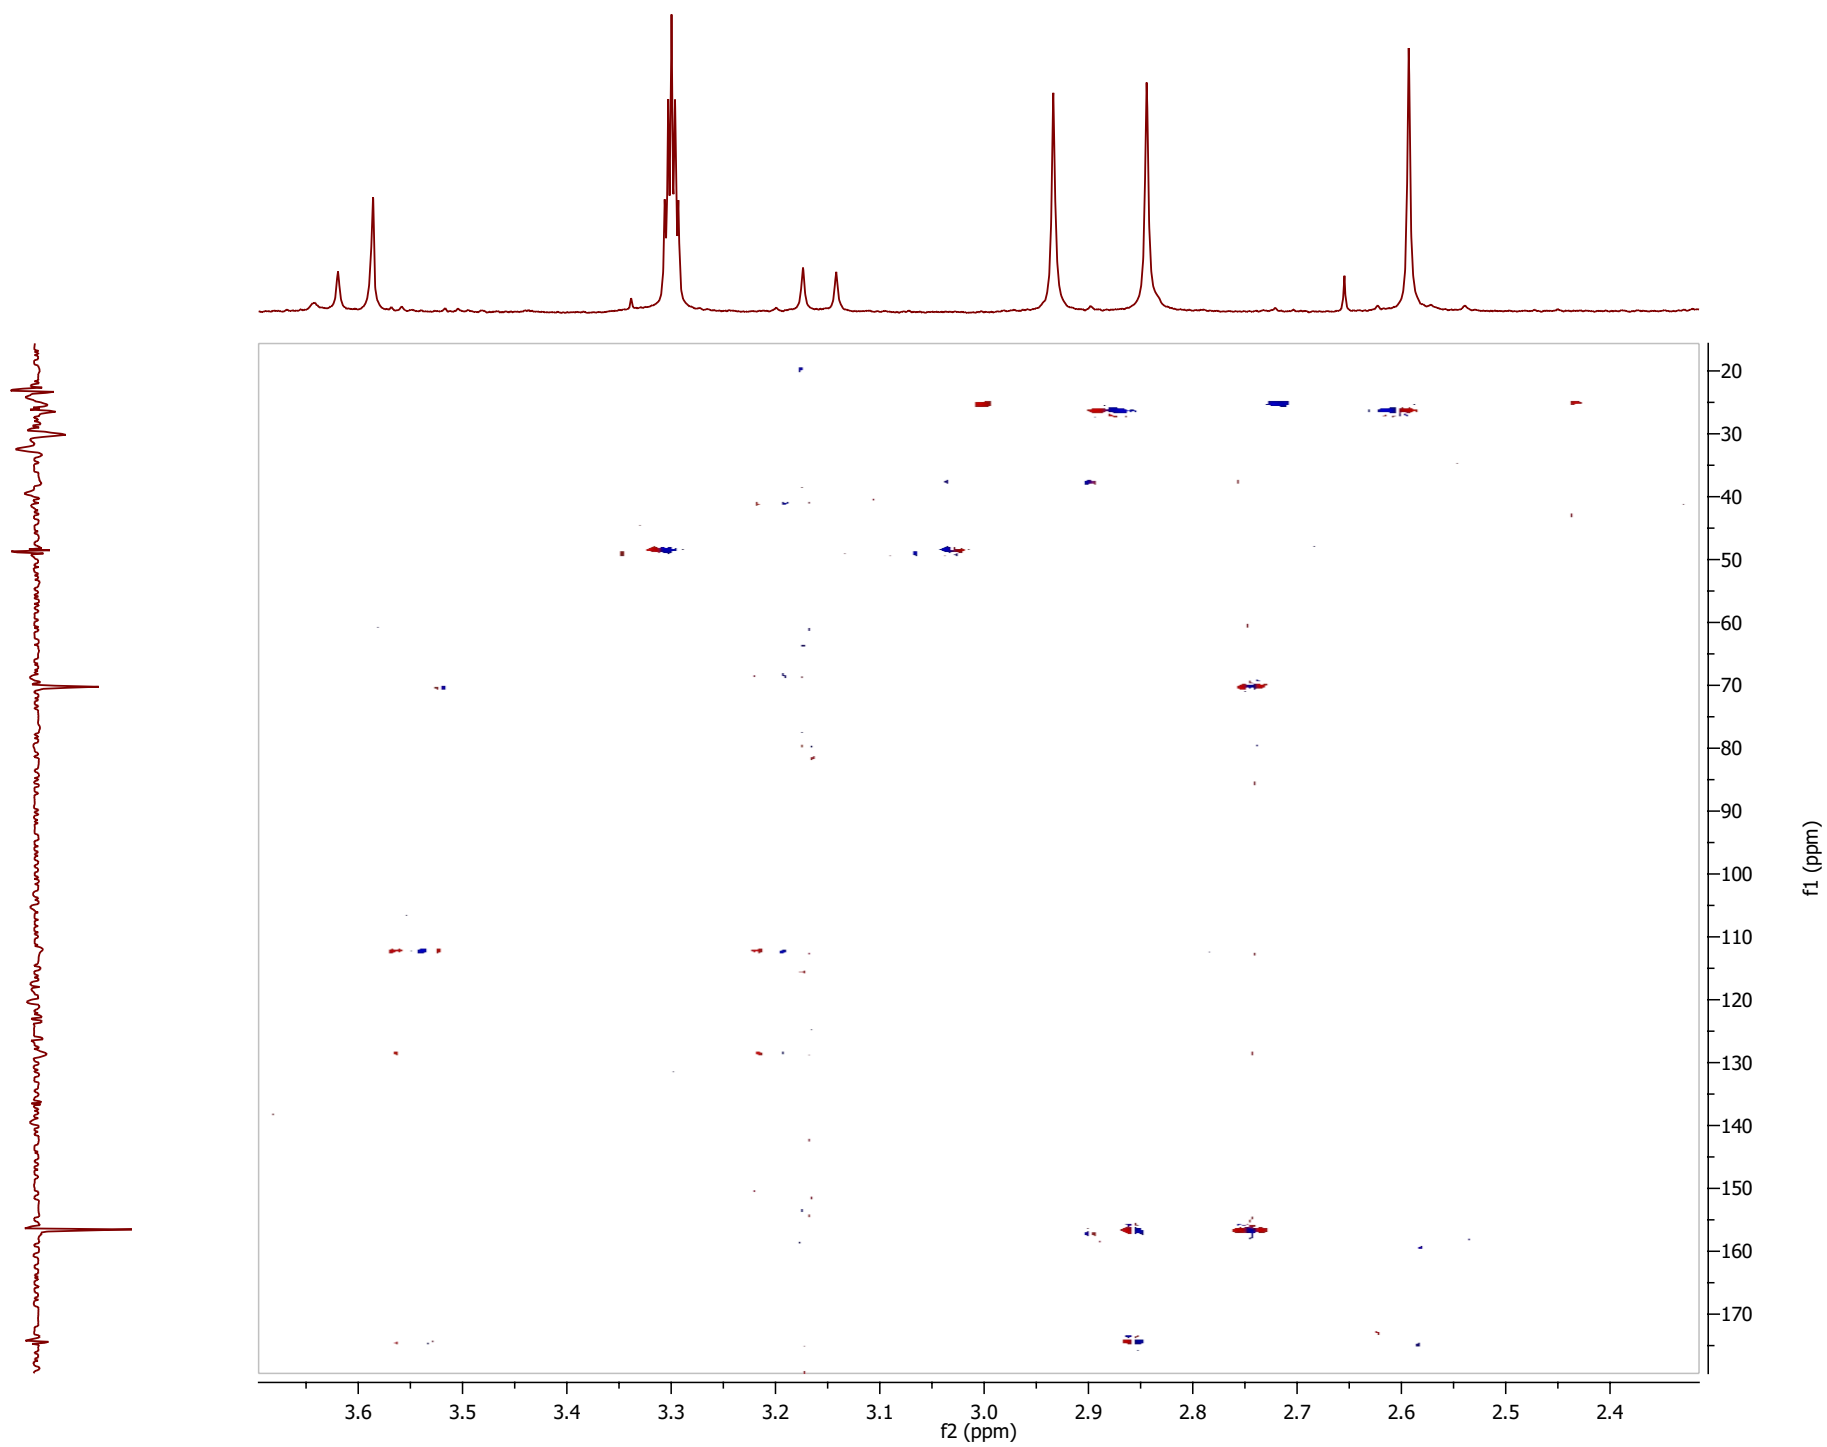

Figure S60. NOESY NMR Spectrum at 500 MHz in MeOH- $d_4$  of Dictazoline D (6)

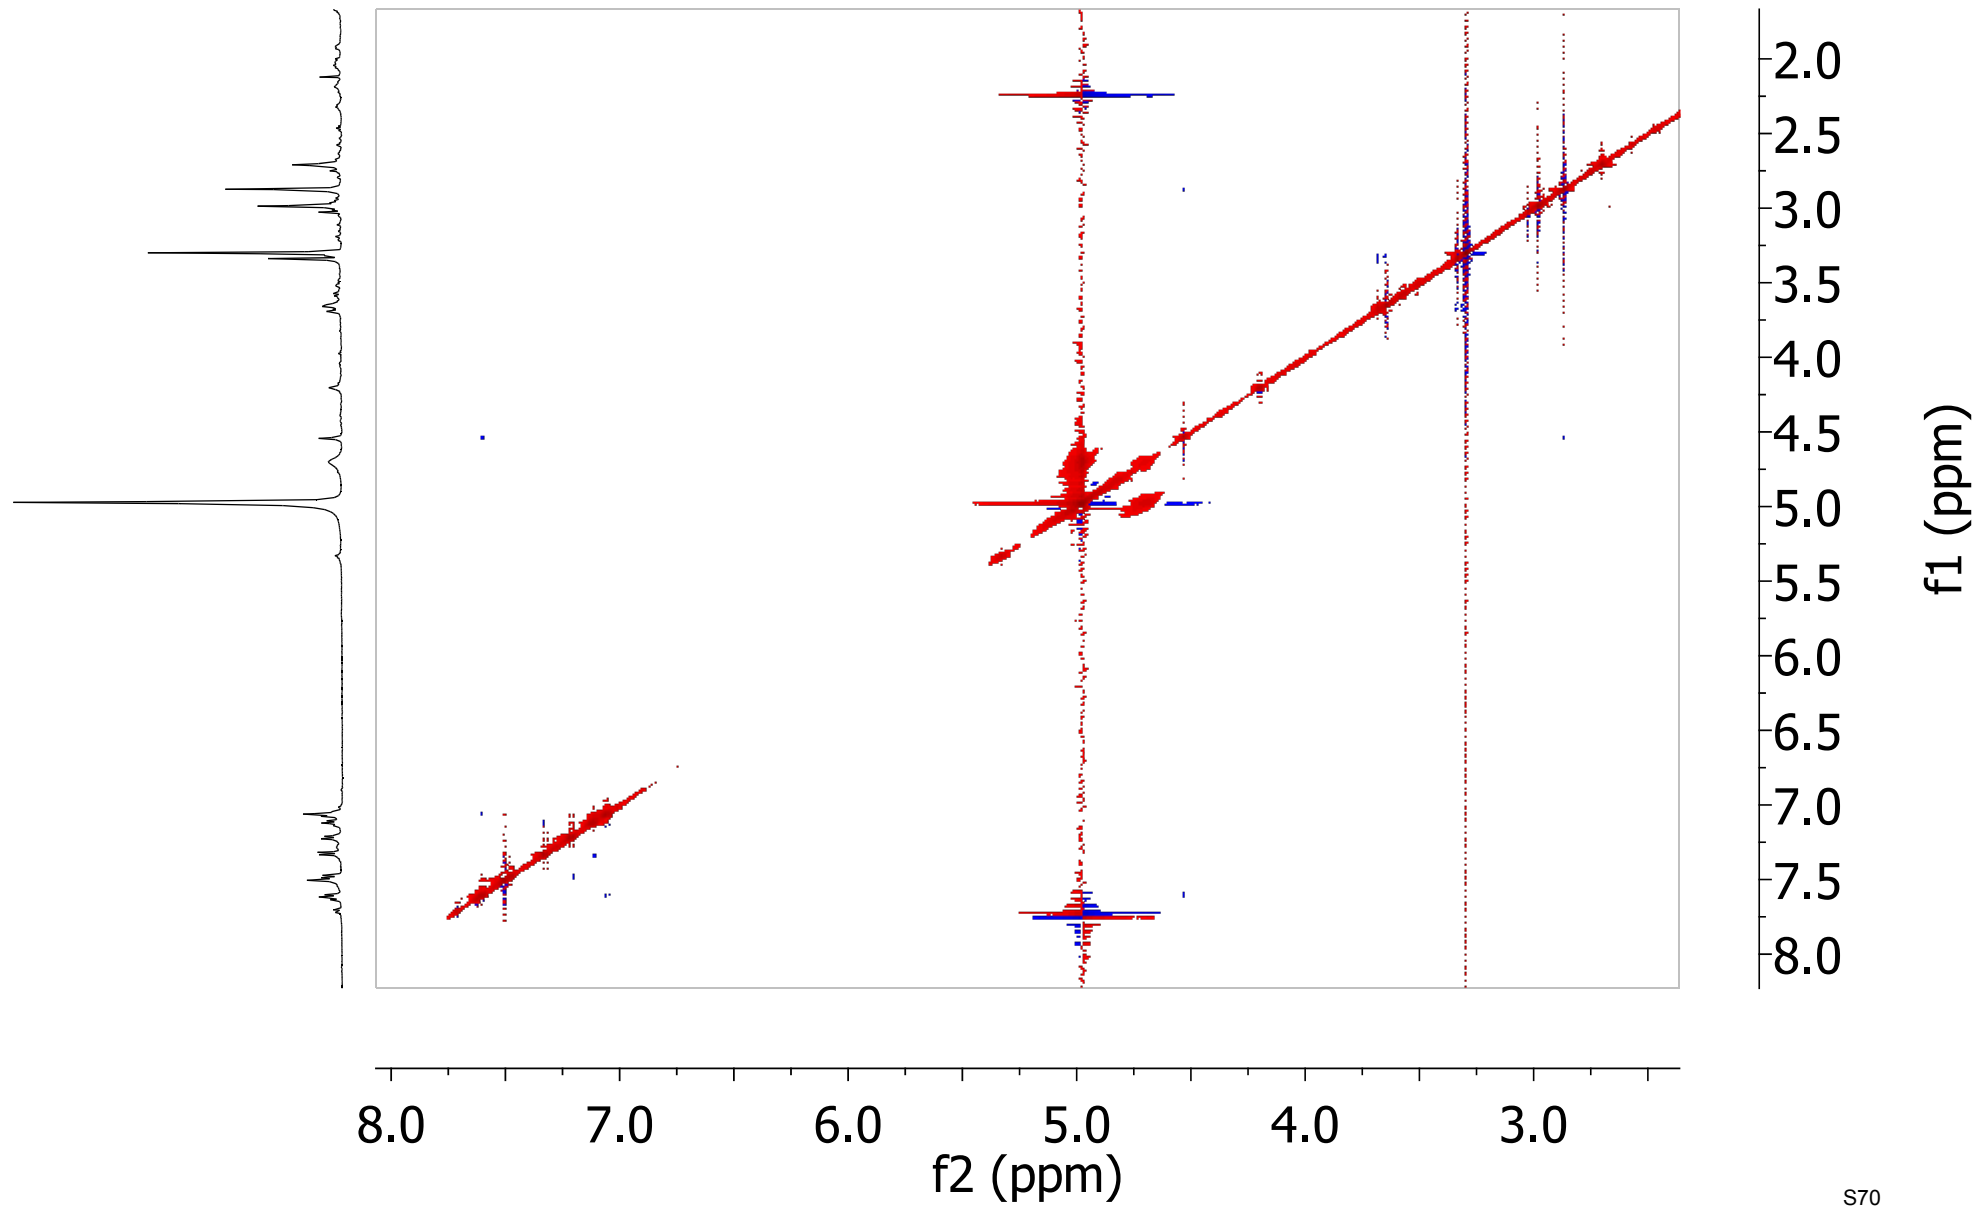

Figure S61. Expansion NOESY NMR Spectrum at 500 MHz in MeOH- $d_4$  of Dictazoline D (6)

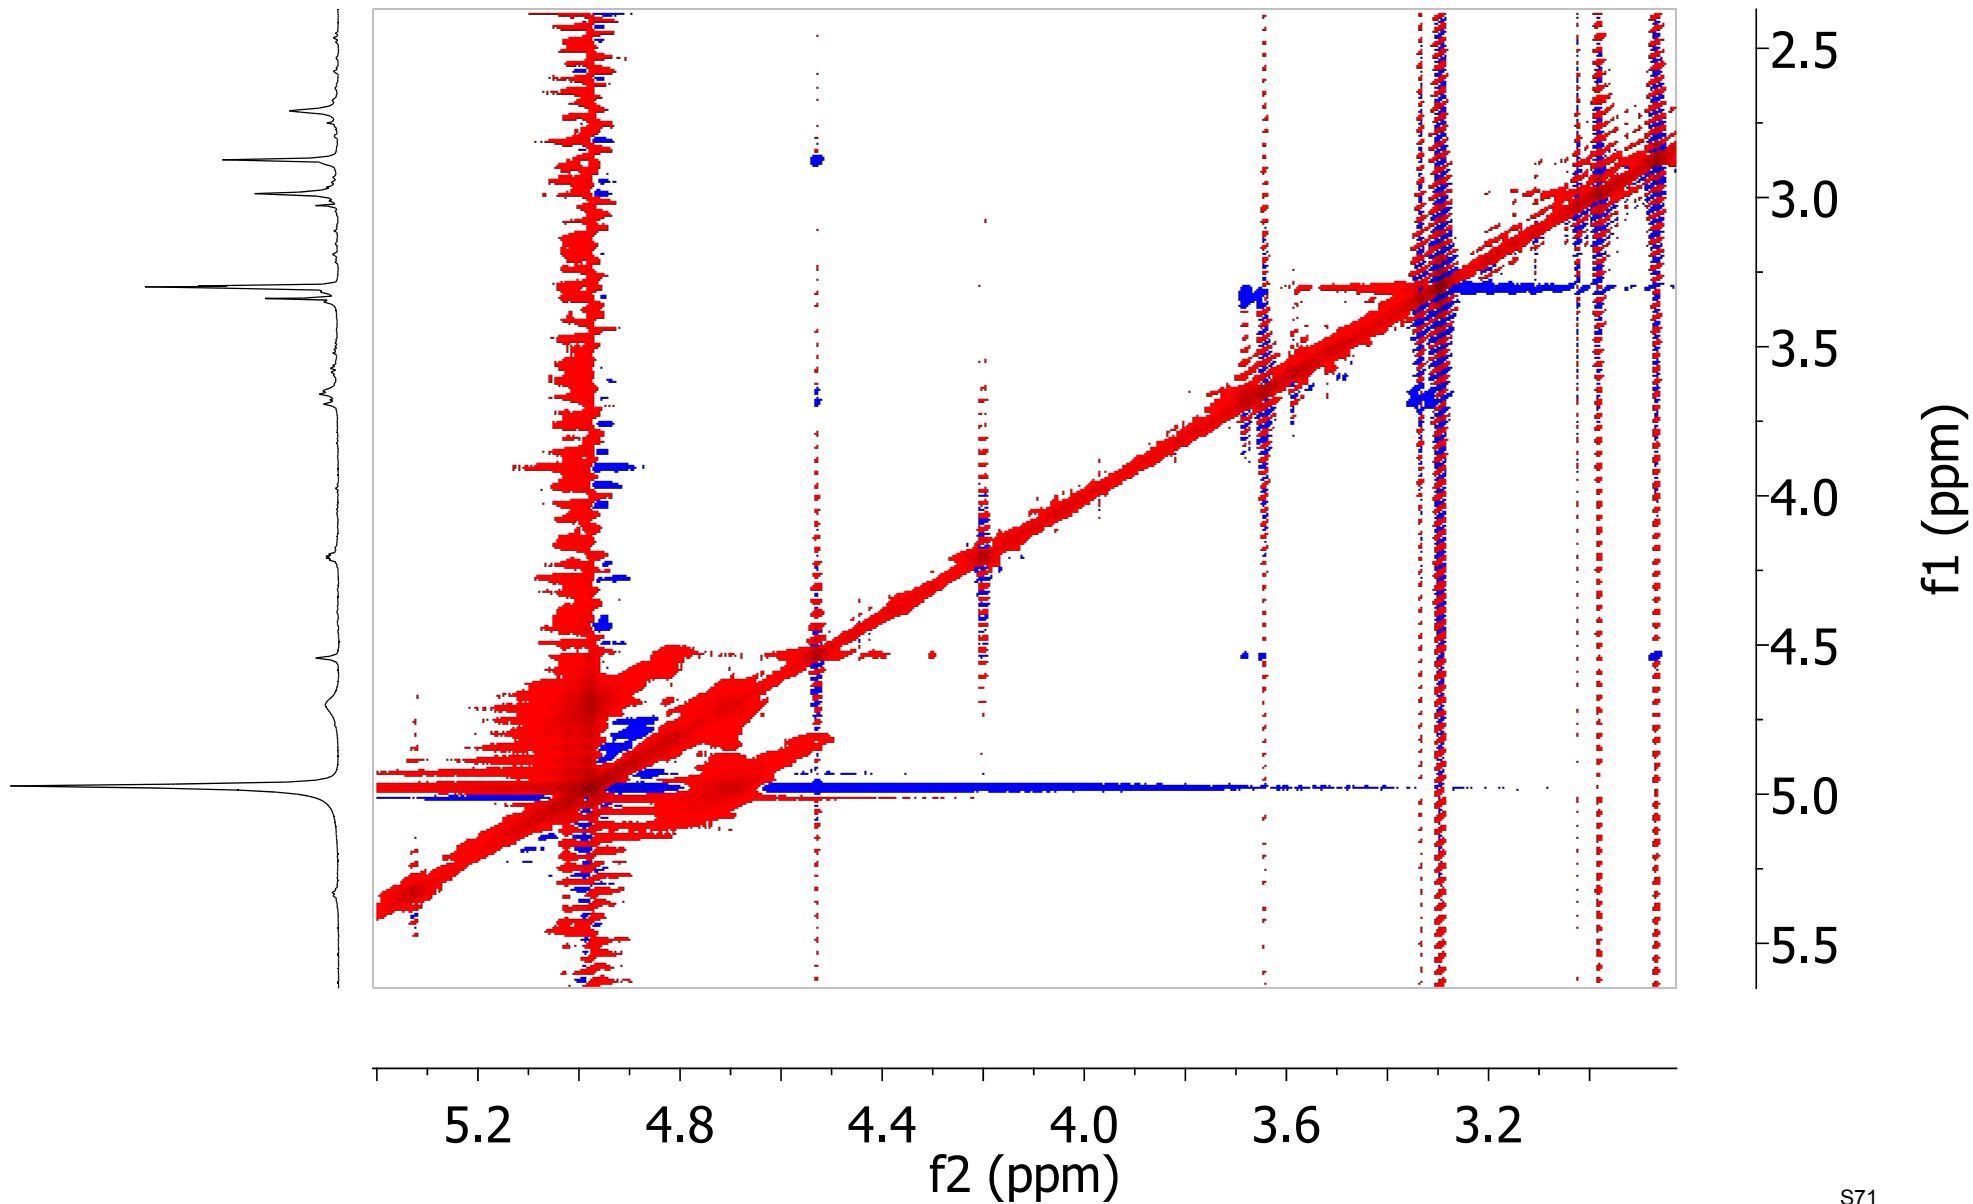

Figure S62.  $^1\text{H}$  NMR Spectrum at 500 MHz in  $\text{MeOH-d}_4$  of Dictazoline E (7) with water suppression

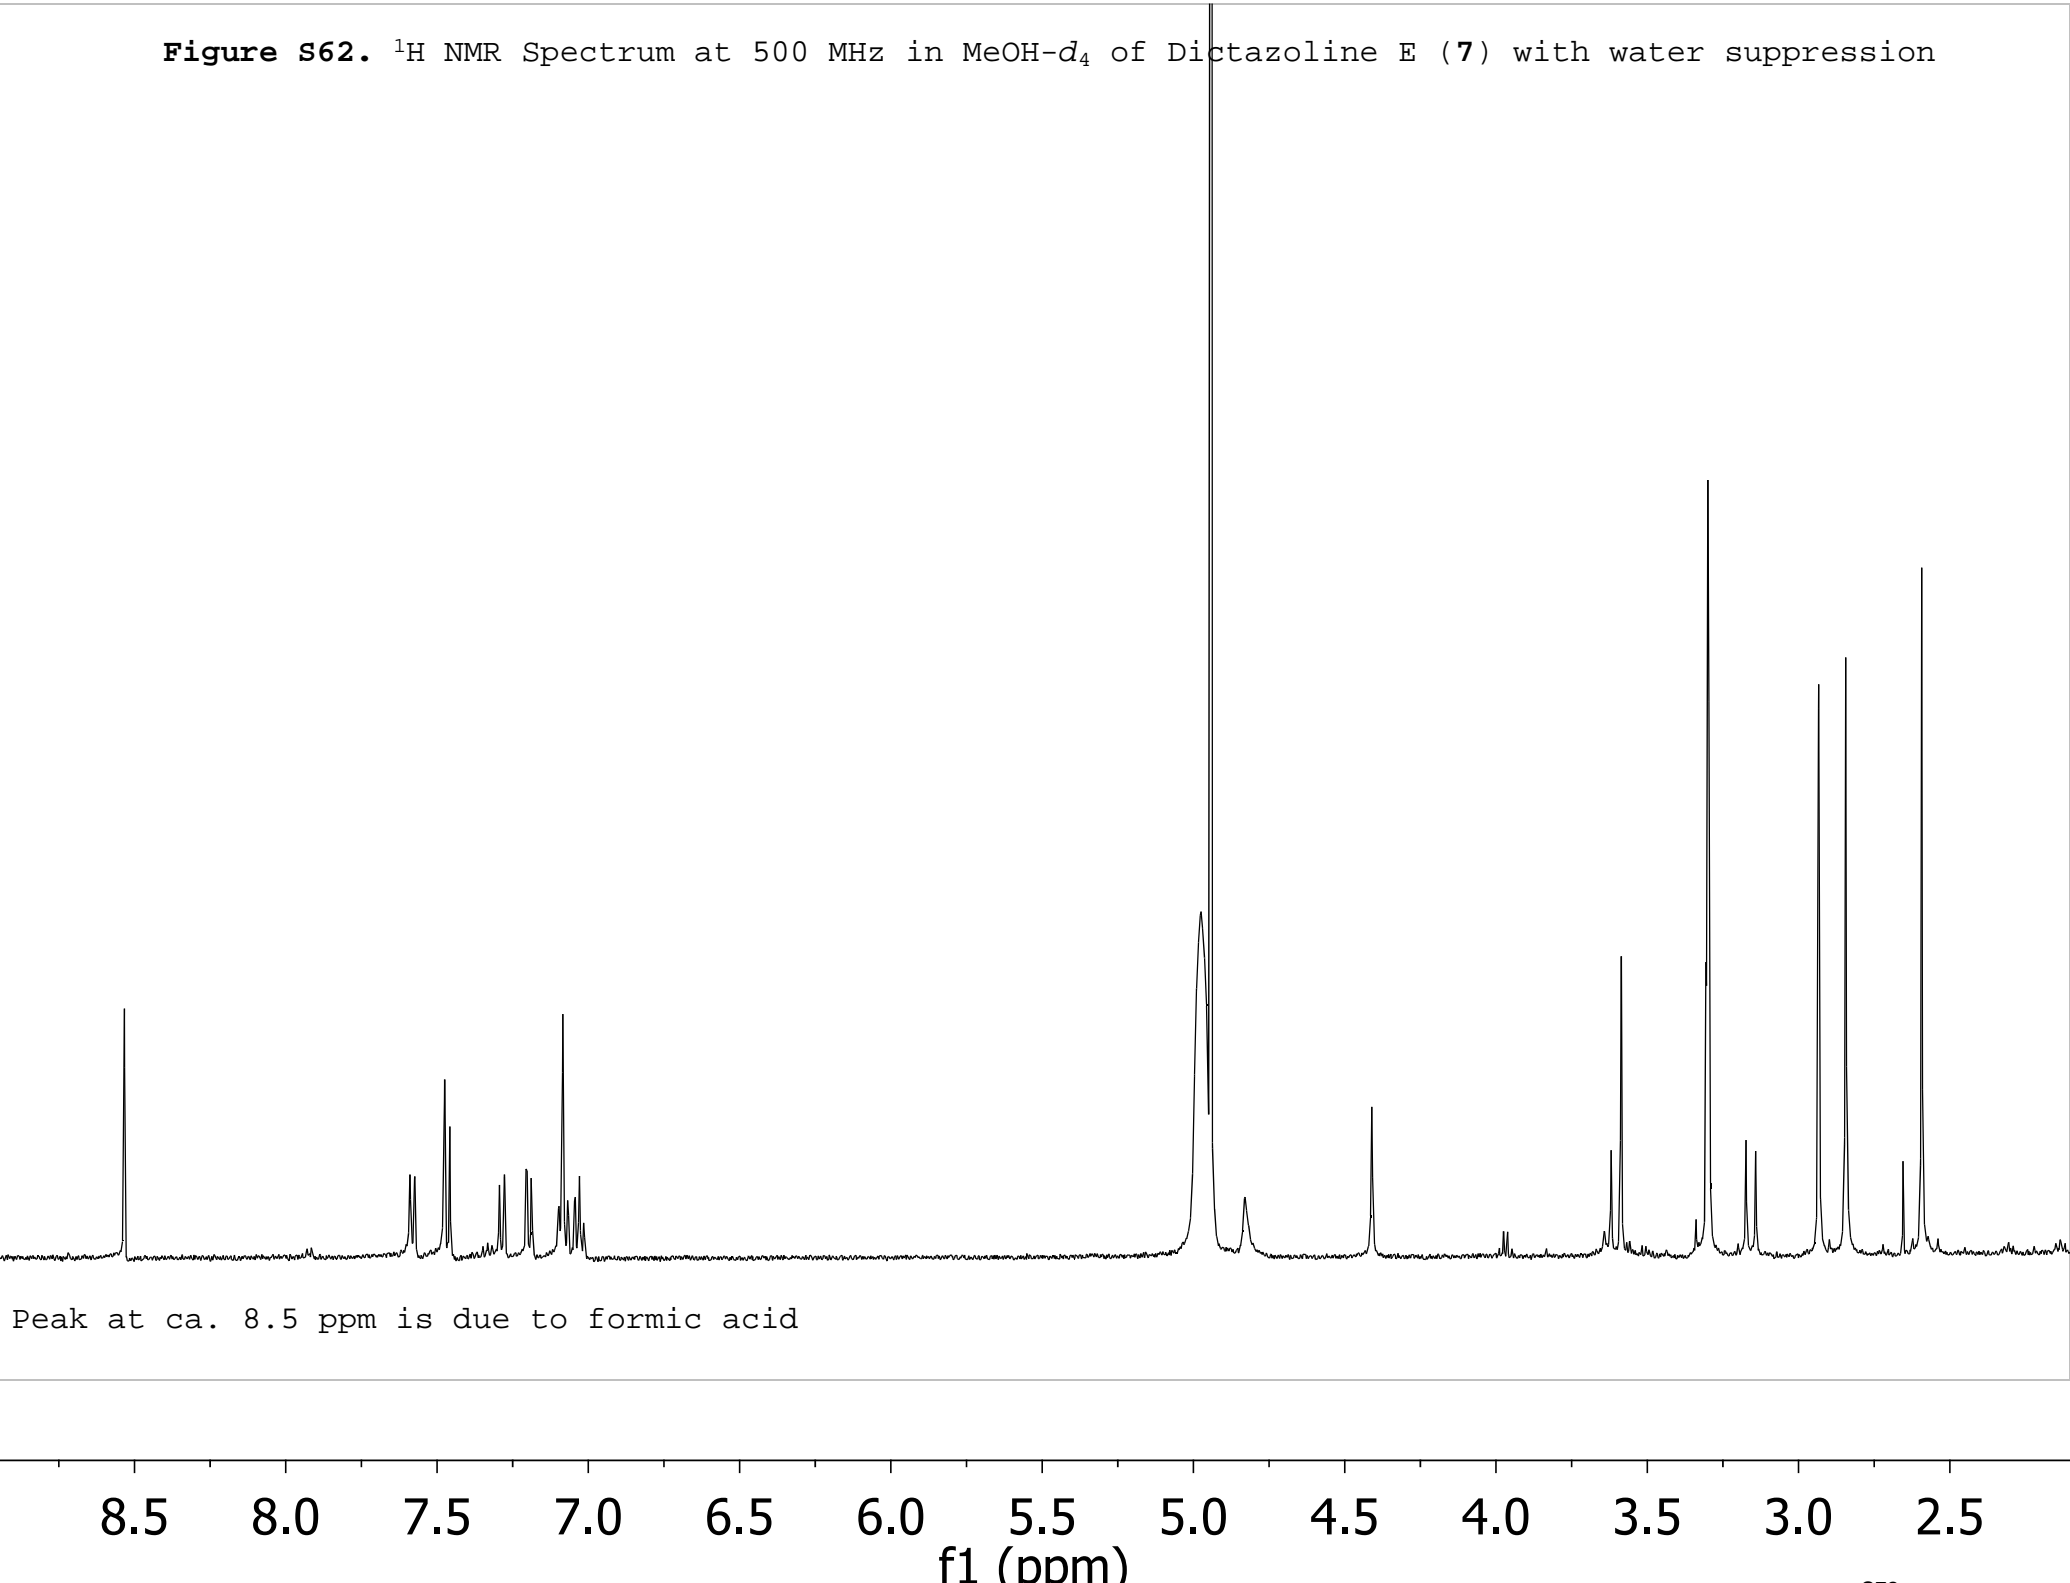

Peak at ca. 8.5 ppm is due to formic acid



Figure S63.  $^{13}\text{C}$  NMR Spectrum at 500 MHz in  $\text{MeOH-}d_4$  of Dictazoline E (7)

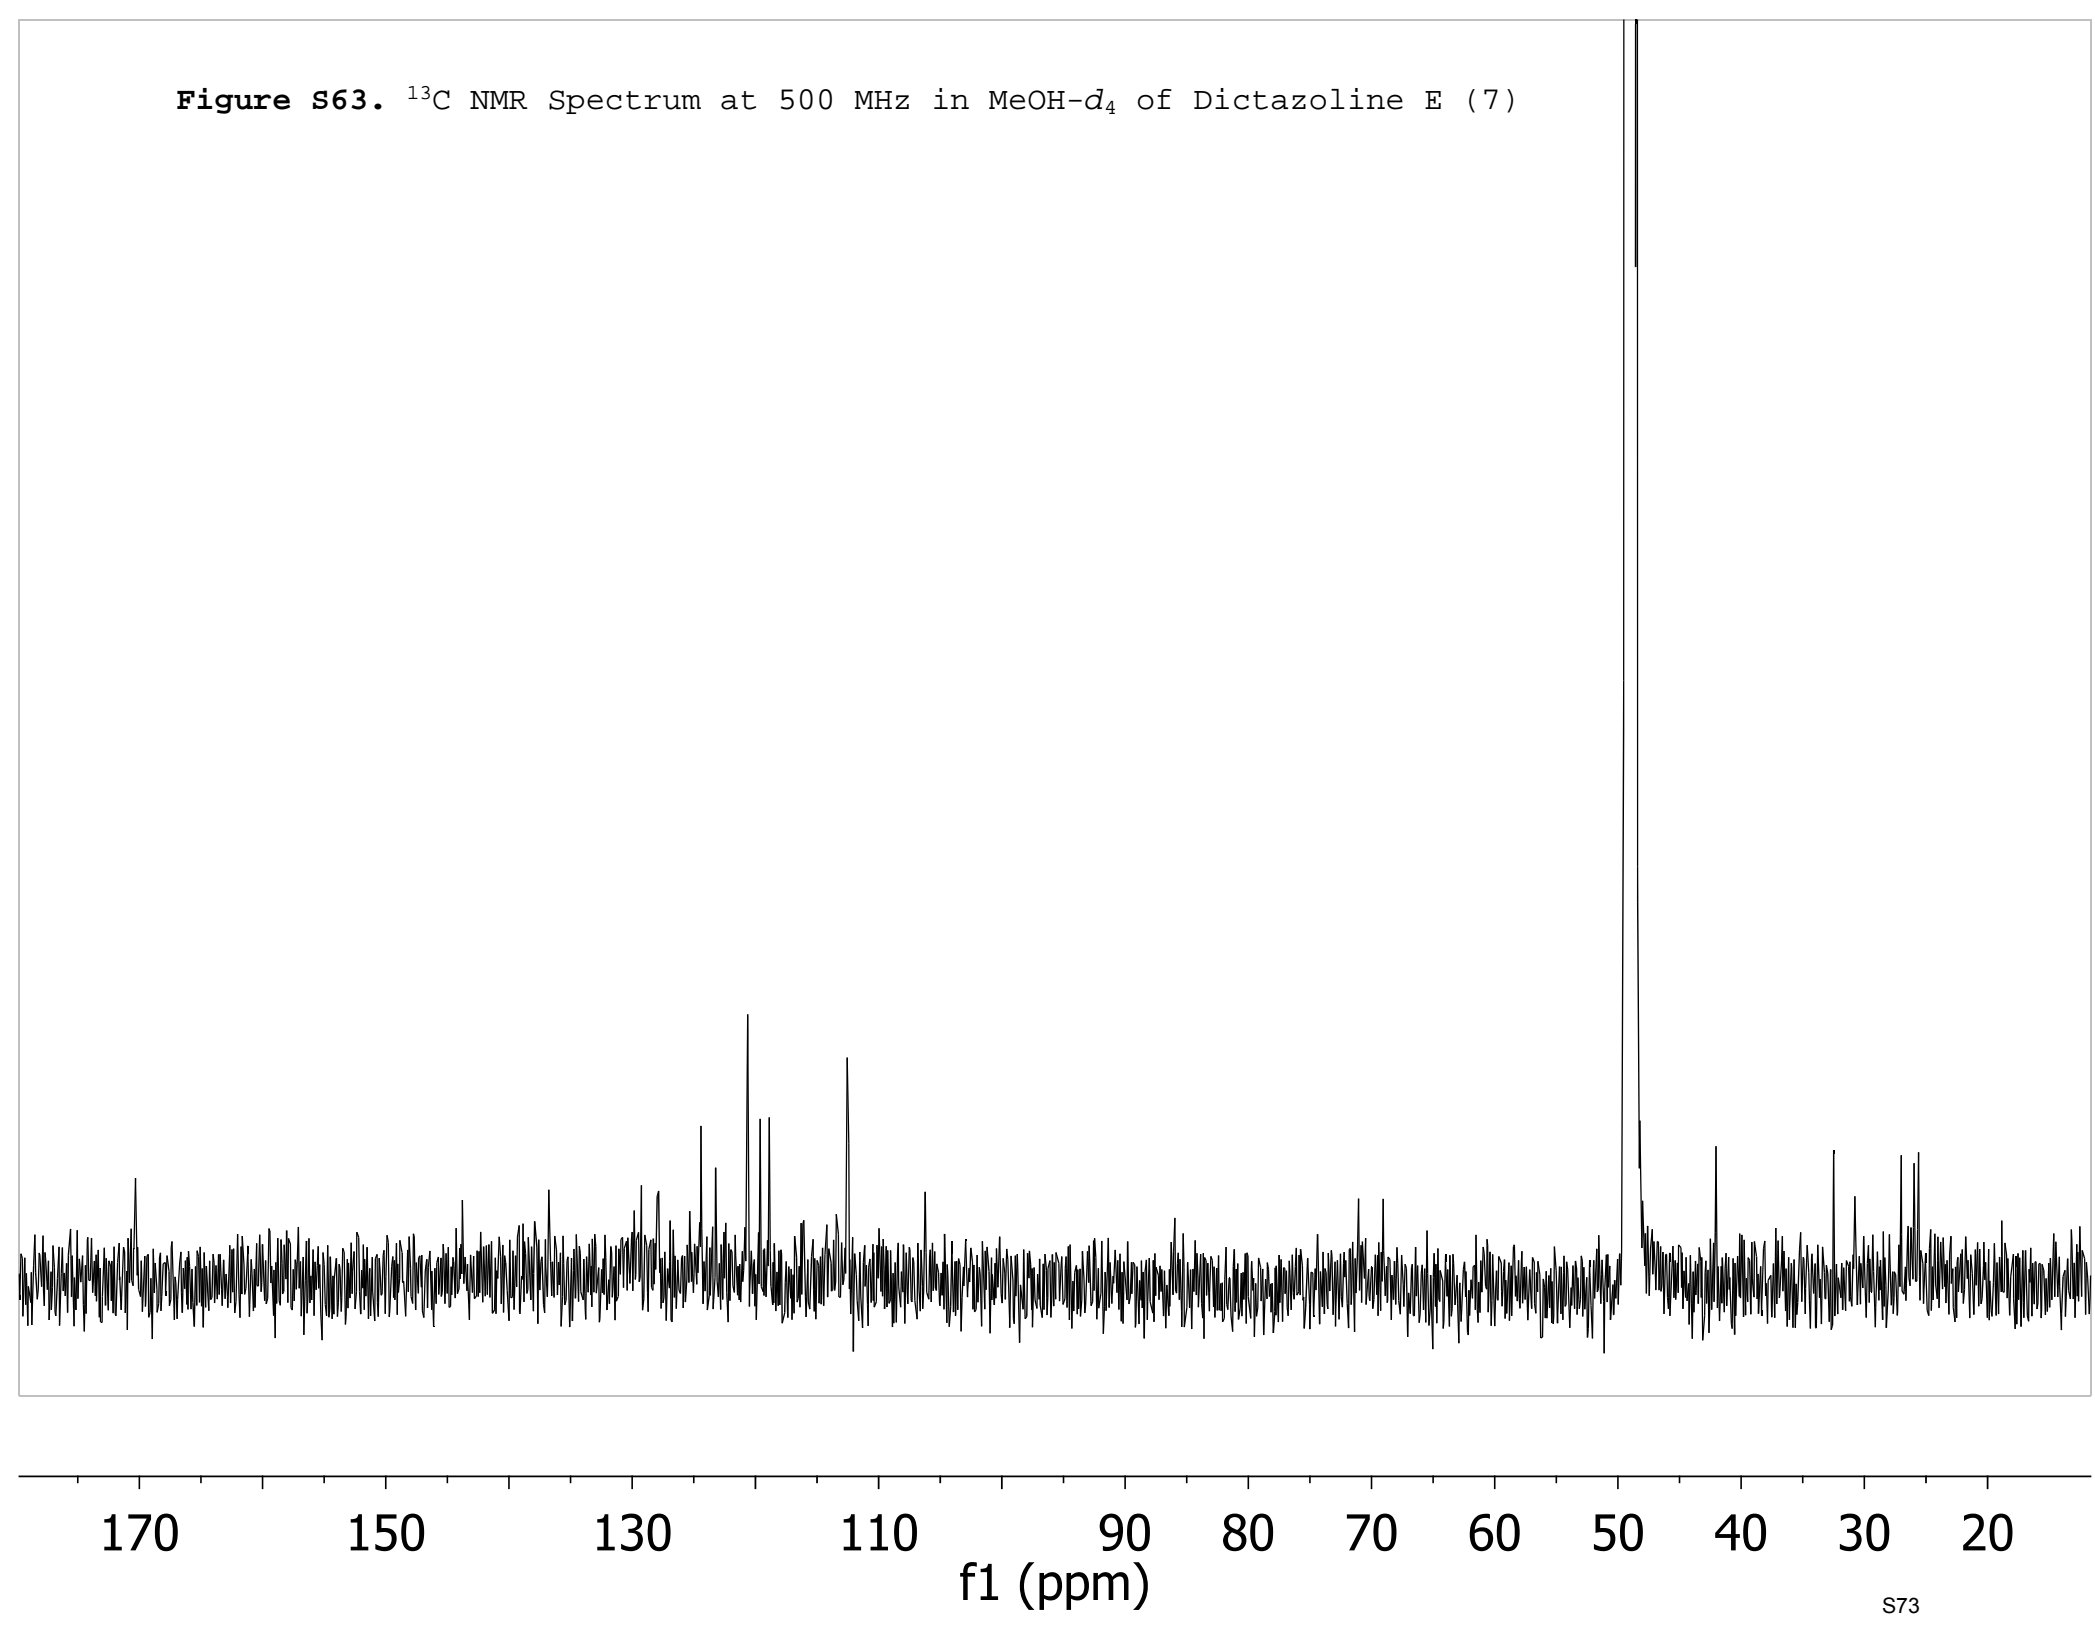

Figure S64. NOESY NMR Spectrum at 500 MHz in MeOH- $d_4$  of Dictazoline E (7)

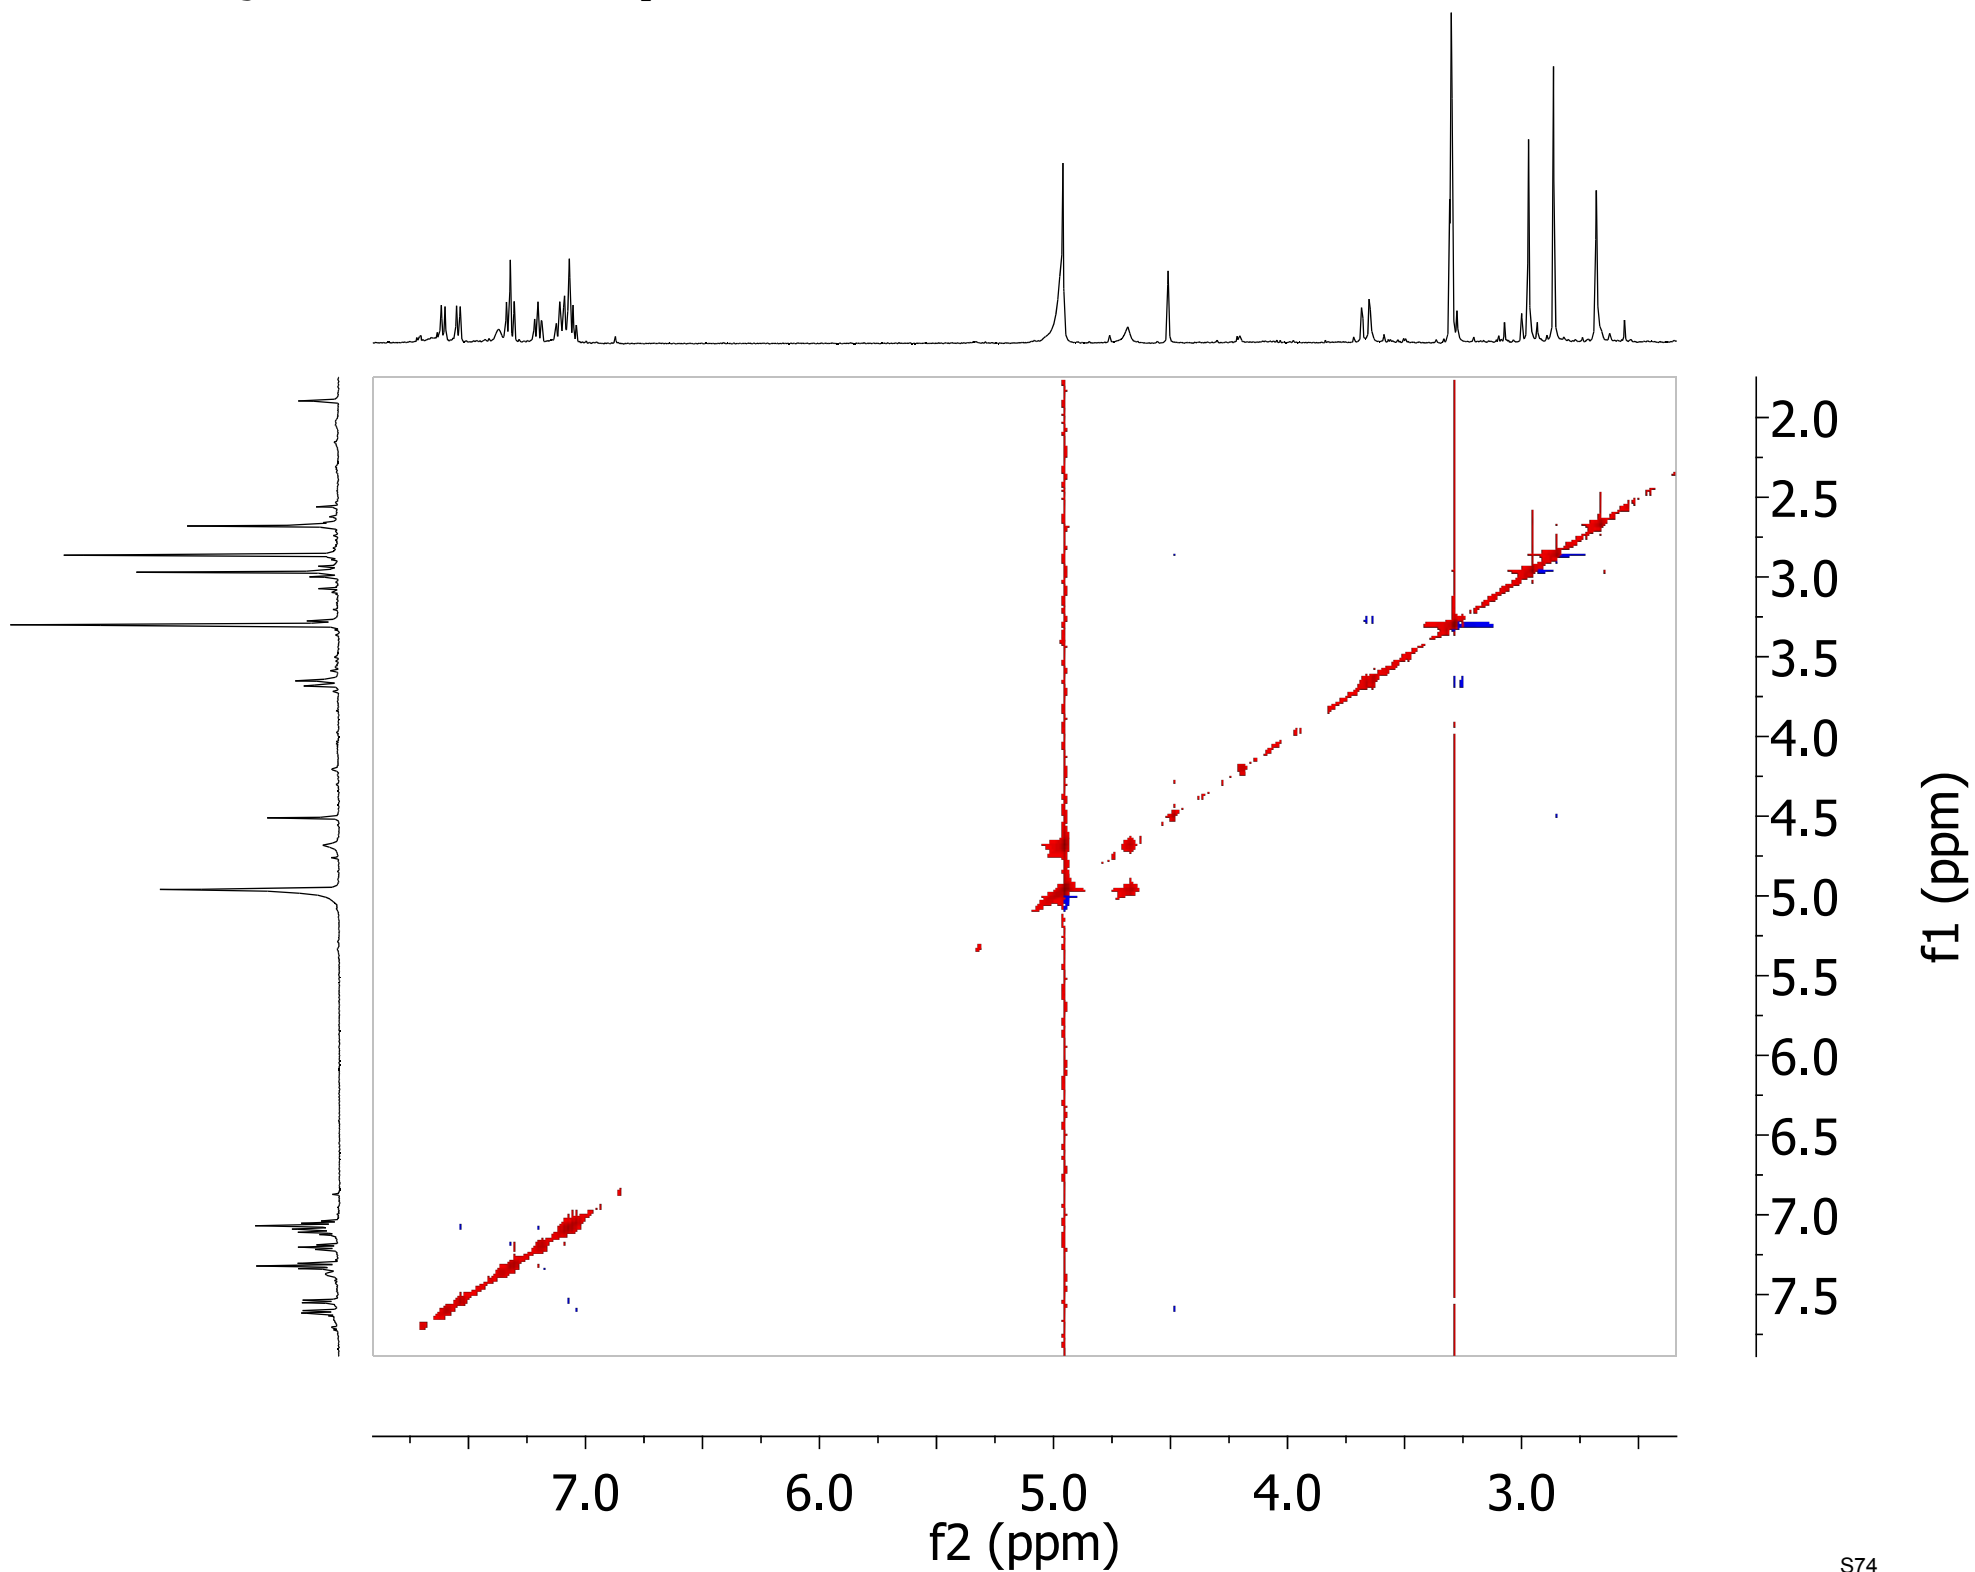

Figure S65. Expansion of NOESY NMR Spectrum at 500 MHz in MeOH- $d_4$  of Dictazoline E (7)

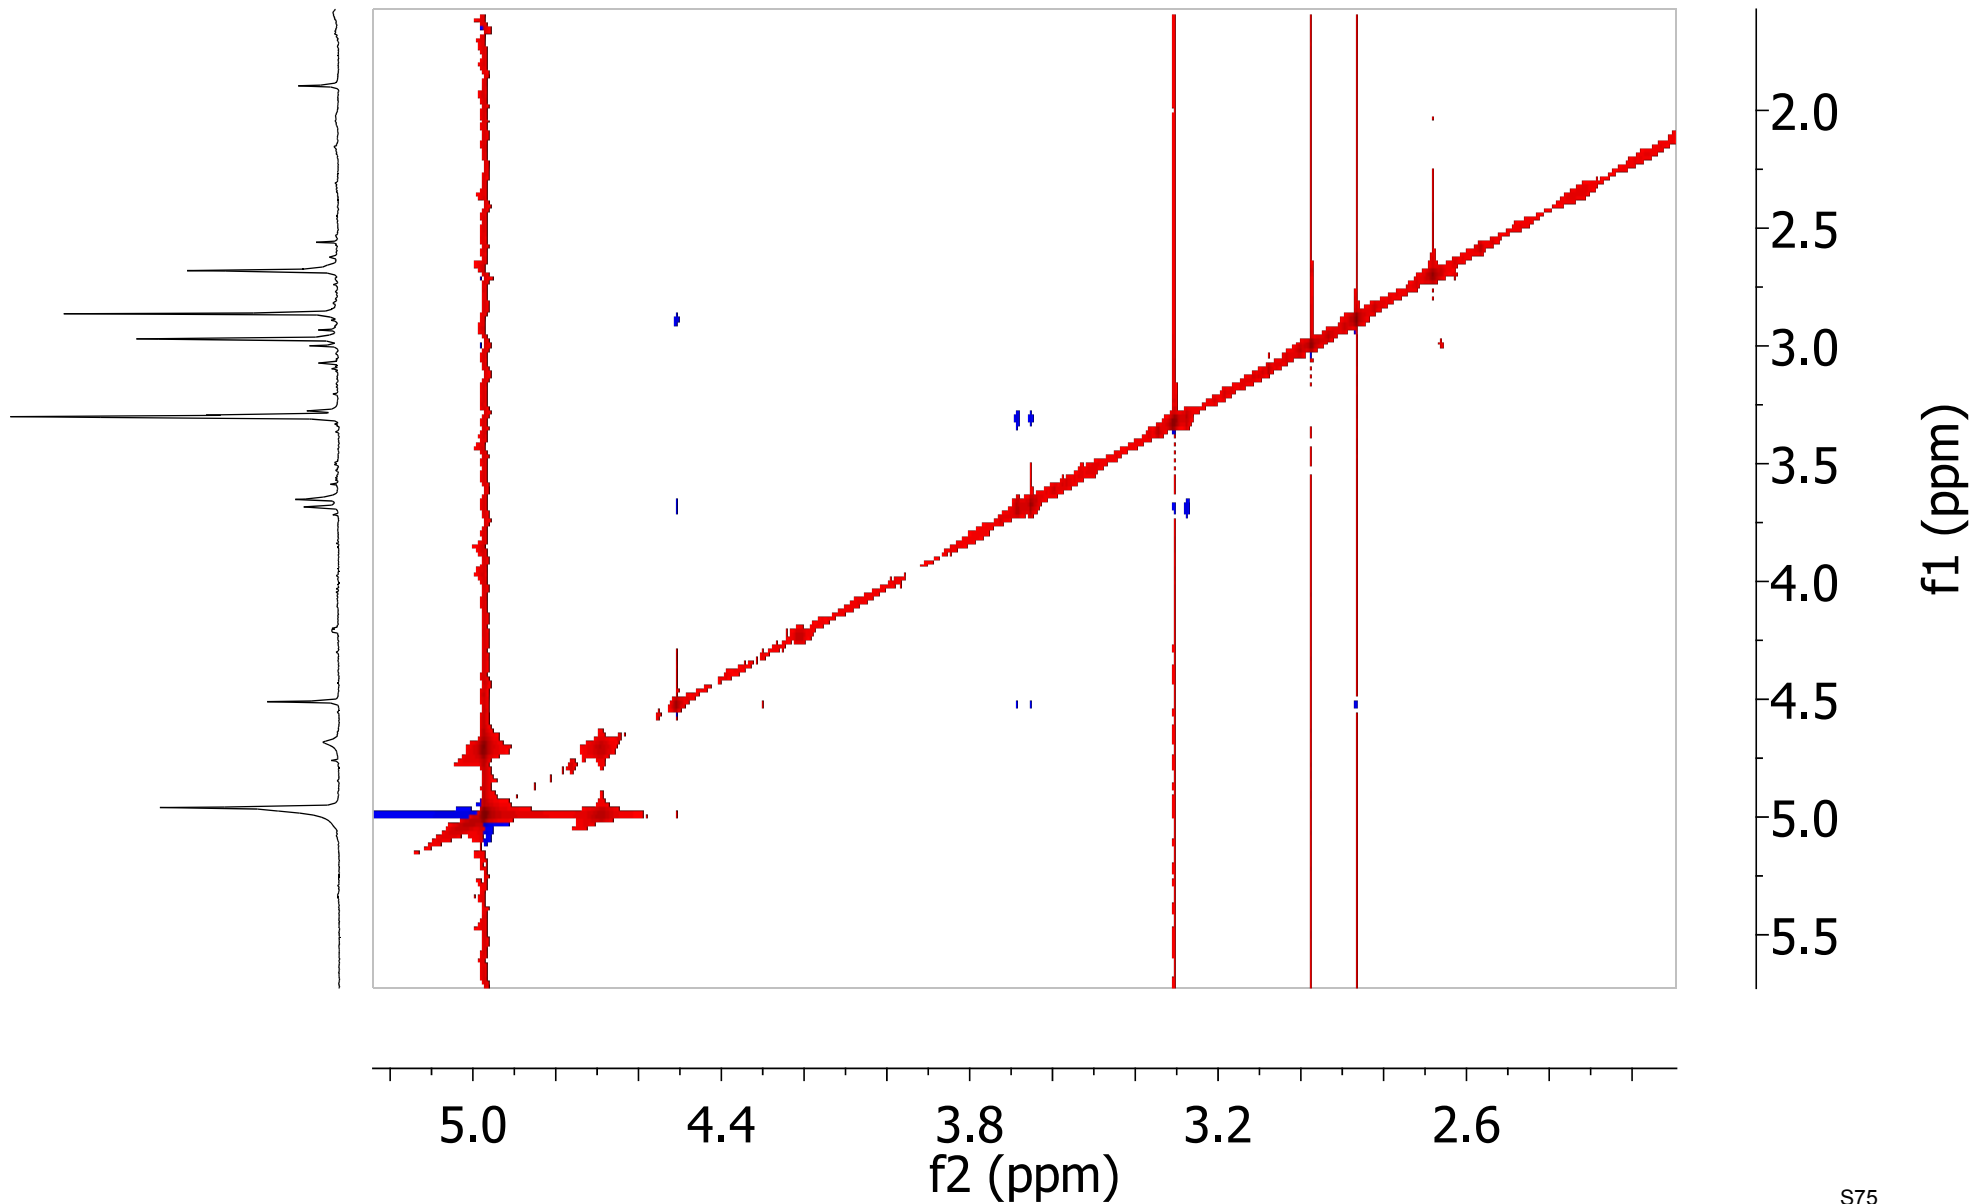

**Figure S66.** LC-MS Chromatogram of Compound **1** prior to microwave irradiation

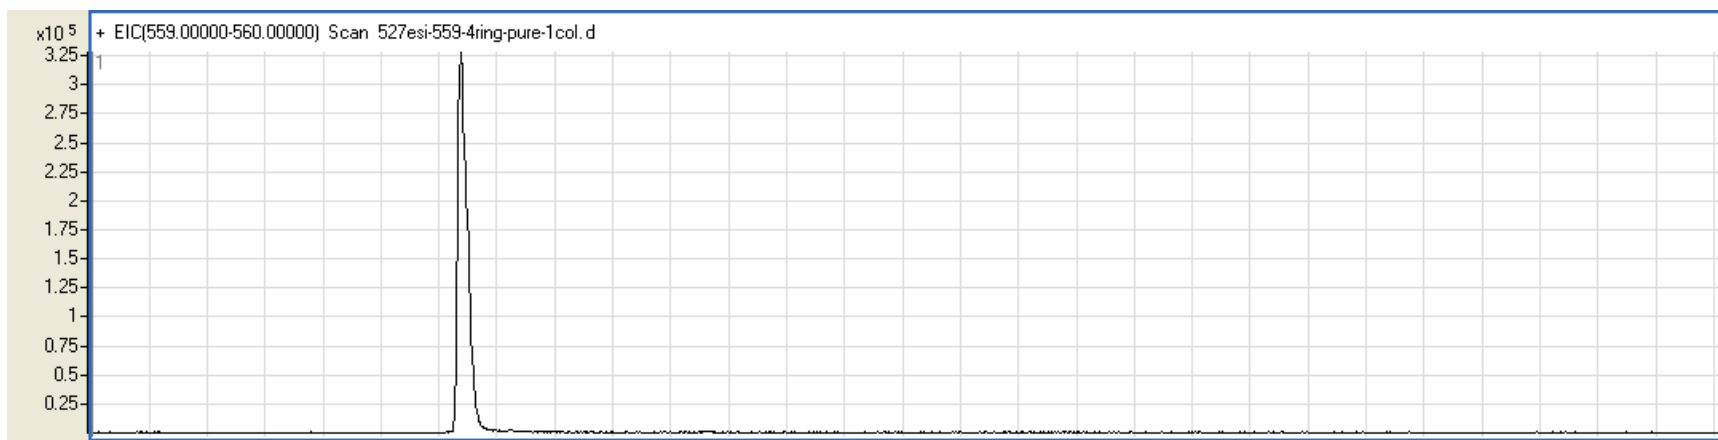

**Figure S67.** Chromatogram of Compound **1** after heating in Methanol

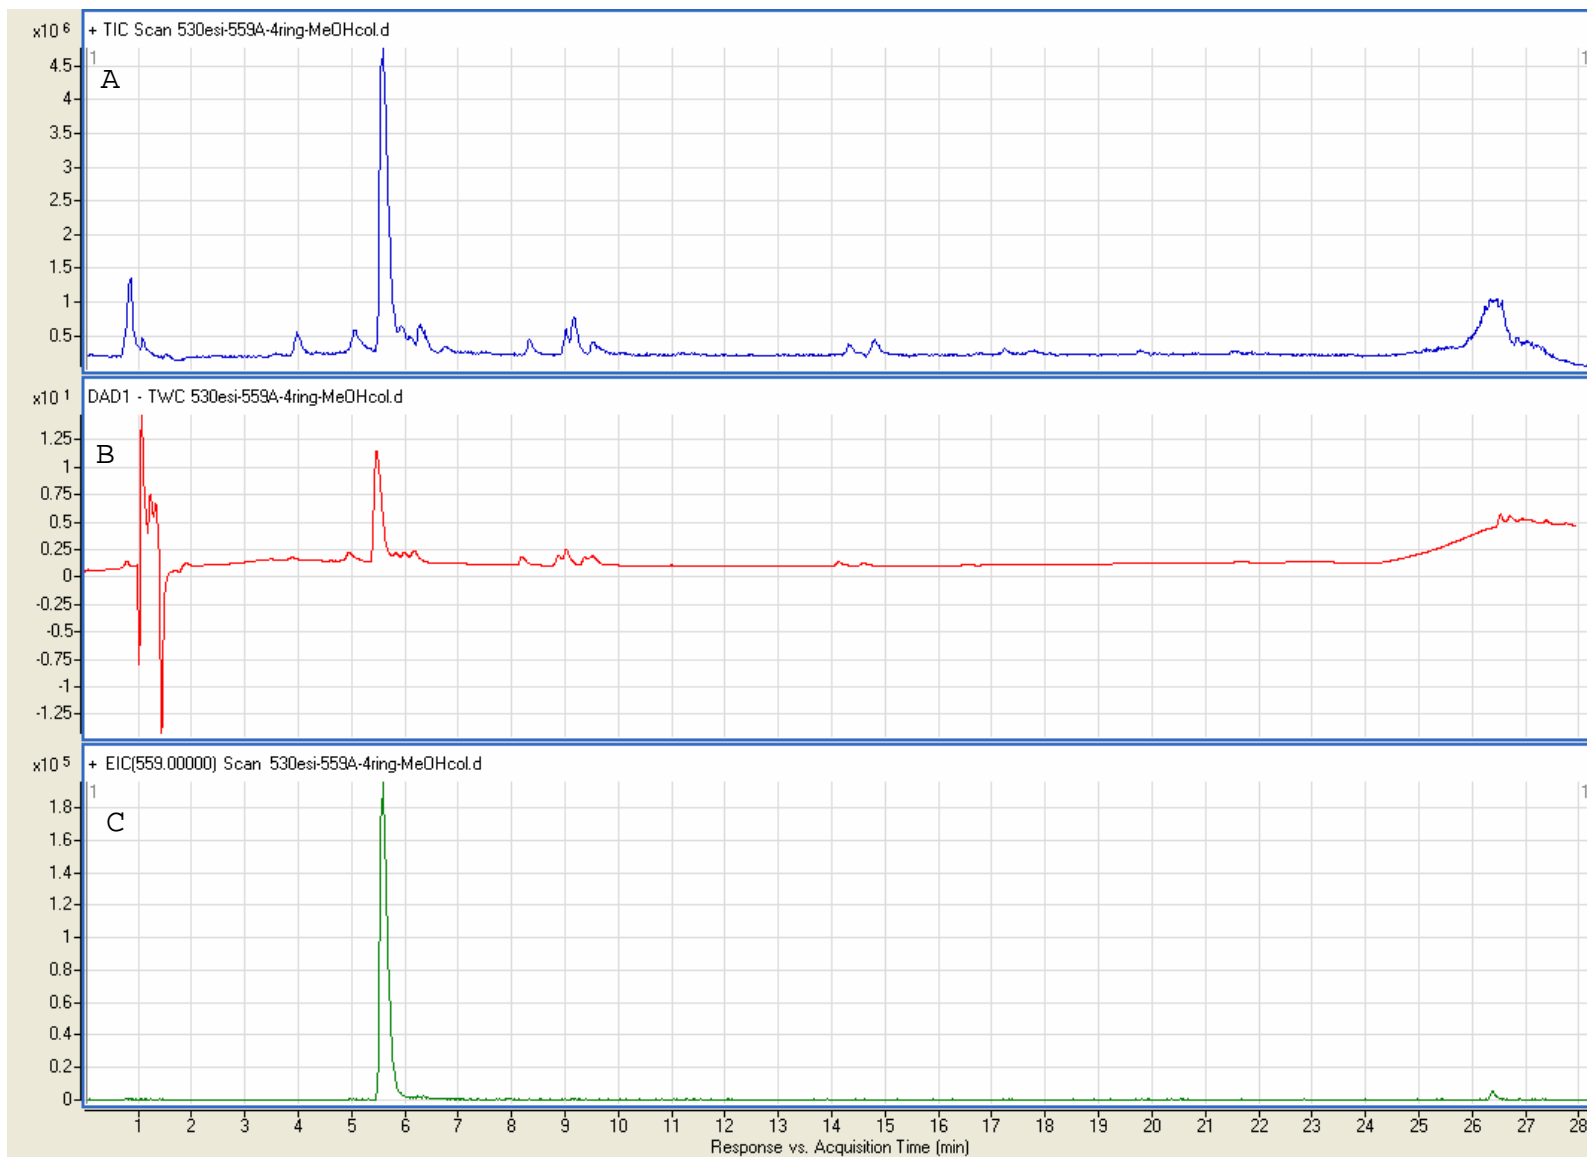

Chromatogram of **1** after microwave irradiation in methanol. A) Total Ion Chromatogram (200–2000  $m/z$ ) B) Diode Array Chromatogram (200–800 nm) C) Extract Ion Chromatogram ( $m/z$  559–560). Column was not overloaded in this initial run. Data from 2nd trial is shown in the paper.

**Figure S68.** Chromatogram of Compound **1** after heating in Water

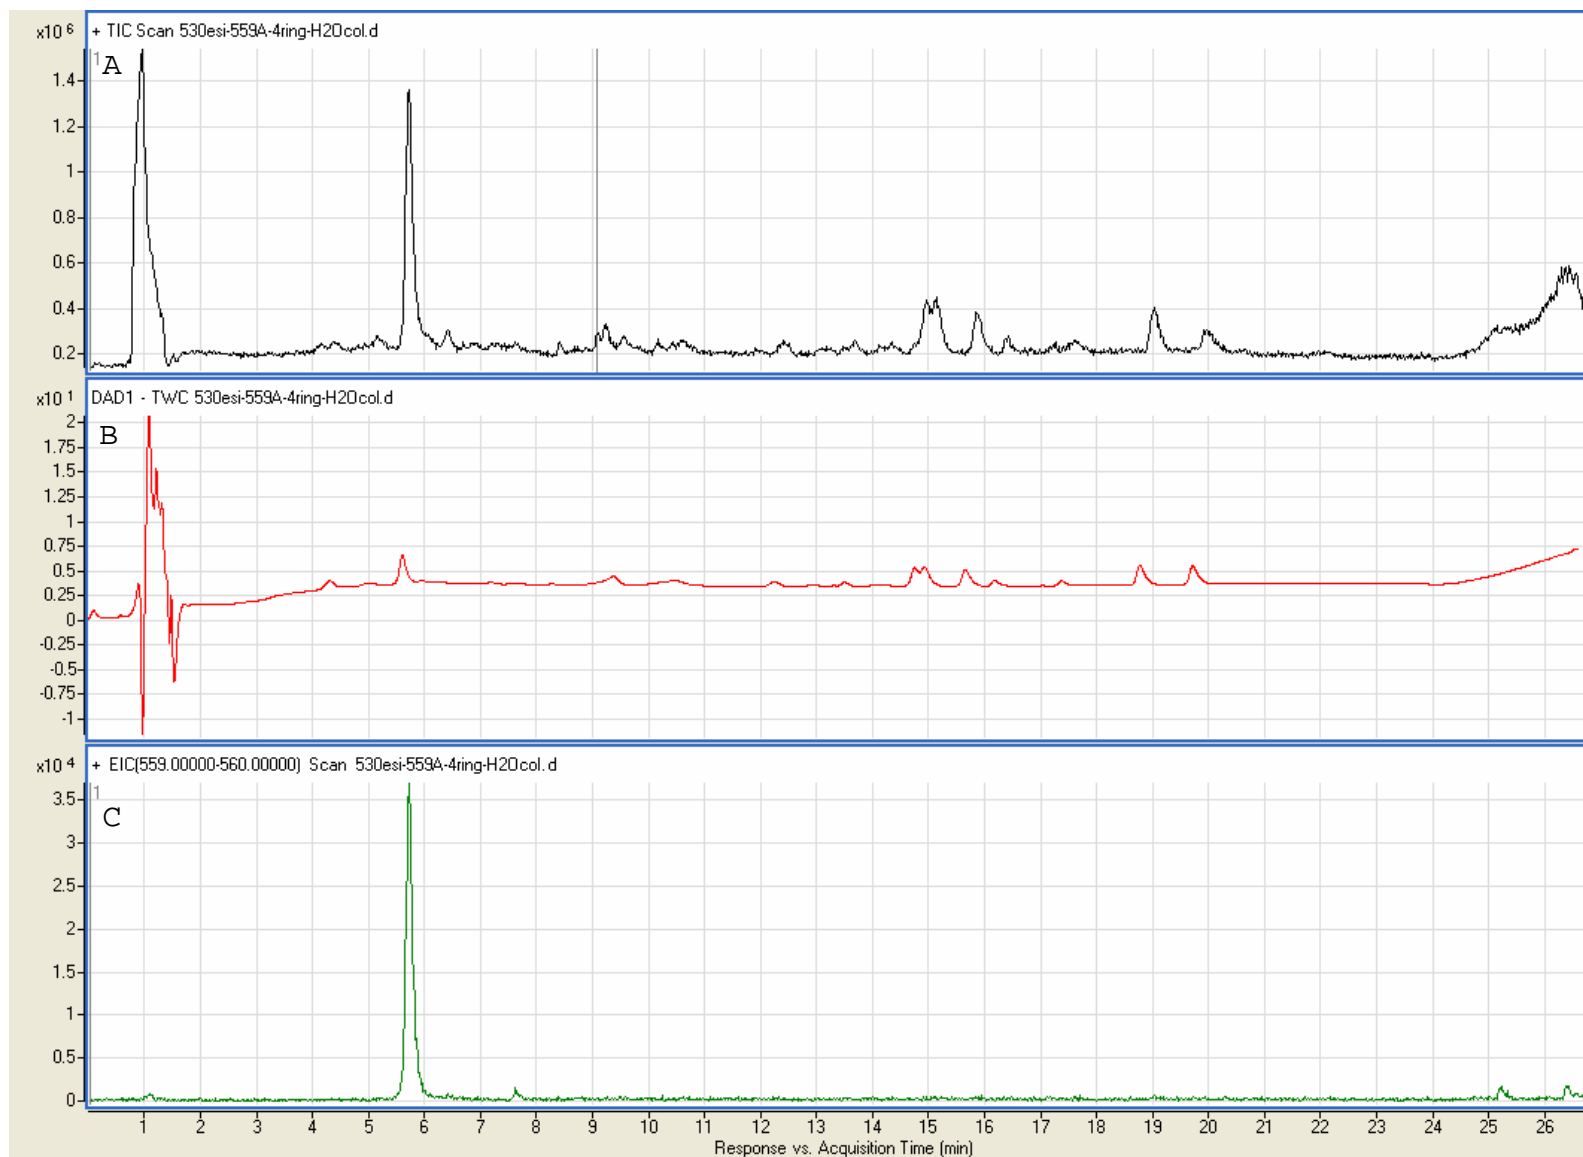

Chromatogram of **1** after microwave irradiation in water. A) Total Ion Chromatogram (200–2000  $m/z$ ) B) Diode Array Chromatogram (200–800 nm) C) Extract Ion Chromatogram ( $m/z$  559–560).

Figure S69. CD spectrum of 1 and 5

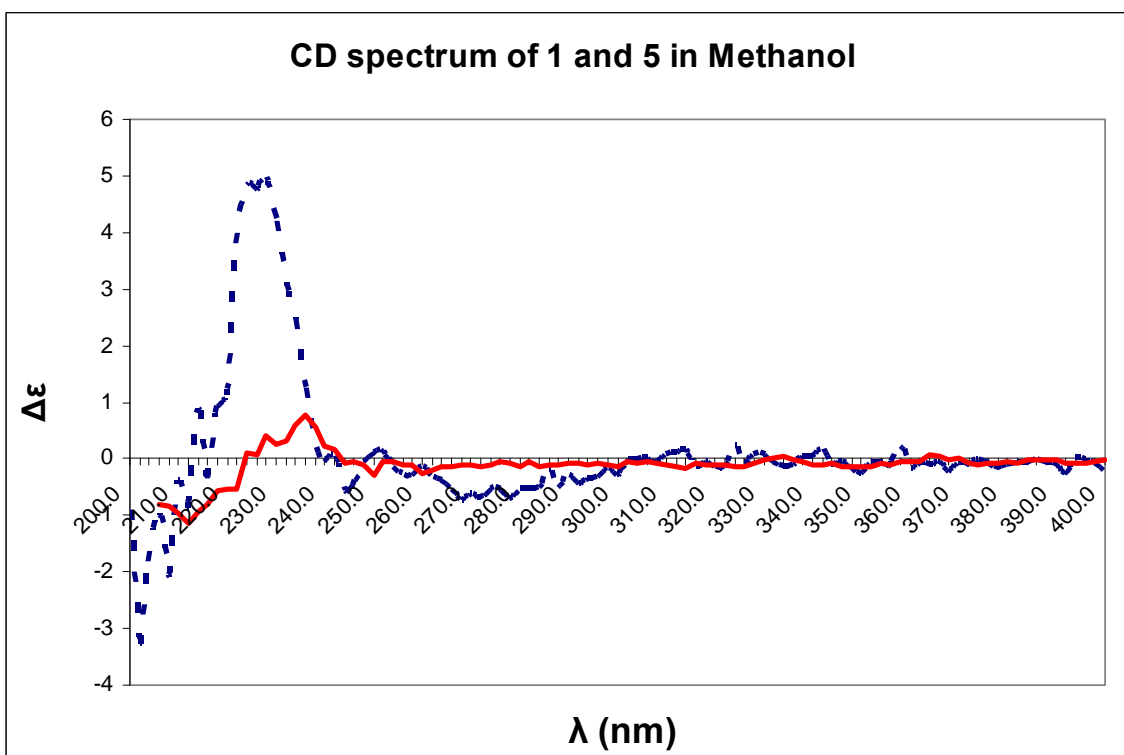

CD spectrum of compound 1 (solid red line) and 5 (dashed blue line)
